# Supplementary material
Source: publisher site journal article supplement (https://www.spandidos-publications.com/4172/downloadSupplementary)
Supplement: Supplementary file 1 [file downloadSupplementary]

## Sheet: GSE106817_diff_logFC1_p0.05
Table SIII. Differentially expressed miRNAs in GSE106817 dataset.
gene_name	logFC	AveExpr	t	P.Value	adj.P.Val	B	UP_DOWN	GSM2851027	GSM2851028	GSM2851029	GSM2851030	GSM2851031	GSM2851032	GSM2851033	GSM2851034	GSM2851035	GSM2851036	GSM2851037	GSM2851038	GSM2851039	GSM2851040	GSM2851041	GSM2851042	GSM2851043	GSM2851044	GSM2851045	GSM2851046	GSM2851047	GSM2851048	GSM2851049	GSM2851050	GSM2851051	GSM2851052	GSM2851053	GSM2851054	GSM2851055	GSM2851056	GSM2851057	GSM2851058	GSM2851059	GSM2851060	GSM2851061	GSM2851062	GSM2851063	GSM2851064	GSM2851065	GSM2851066	GSM2851067	GSM2851068
hsa-let-7a-2-3p	1.62781	0.412692	6.51423	4.52742e-10	1.7542e-09	11.7866	UP	0.867178	3.74788	-1.63331	-1.6019	-0.753	-1.33043	-1.63632	1.1475	-0.361248	-1.49655	-1.08331	-1.53249	-1.59132	-1.37441	-0.79222	-1.15718	-1.12207	-0.742883	3.59039	-1.45183	-1.63778	-0.224824	-1.29147	-1.57603	-0.482824	7.4534	2.5333	2.6889	-1.63472	2.03283	-1.4824	4.59074	-1.61629	-1.41896	-0.7093	0.505543	-0.884943	-1.66156	-1.66329	1.68748	2.60045	-1.14451
hsa-let-7a-5p	-3.02718	1.2445	-9.78902	3.78795e-19	3.12414e-18	32.4212	DOWN	-0.0794565	4.68177	0.441785	5.10709	4.07671	4.87946	3.41062	4.62652	-0.361248	4.80581	-1.08331	2.08485	5.06672	3.7959	-0.79222	4.93023	3.80361	4.7908	5.74203	4.59265	4.82126	4.76406	3.66287	1.45453	-1.66137	4.93596	4.49633	0.91977	-1.63472	3.47604	2.33482	-1.45027	1.39101	4.37763	-0.7093	3.20708	5.19184	-1.66156	2.72349	-1.50963	0.165139	3.70918
hsa-let-7b-3p	2.44213	1.86402	9.29137	1.18211e-17	8.86582e-17	29.0111	UP	3.0857	-1.56057	0.0965826	-1.6019	-0.753	-1.33043	-1.63632	1.40956	-0.361248	2.05973	3.35843	-1.53249	-1.59132	-1.37441	-0.79222	-1.15718	-1.12207	3.17544	-1.63592	-1.45183	8.0583	-0.83653	-1.29147	3.03438	2.84466	2.43653	3.20186	1.61497	0.319241	1.96697	4.02437	2.97973	4.35456	-1.41896	-0.7093	1.57707	-0.884943	4.10893	-1.66329	-1.50963	-1.60817	-1.14451
hsa-let-7b-5p	-2.27259	2.14438	-7.45549	1.79513e-12	8.75384e-12	17.2215	DOWN	-1.64092	5.43427	-1.63331	3.32441	4.44298	5.16117	4.72972	4.02863	-0.361248	3.85207	-1.08331	-1.53249	4.79822	3.91525	-0.79222	4.93422	6.01563	2.97147	4.5869	4.76406	4.85963	5.07821	4.67828	1.06385	-1.66137	4.82505	1.84783	-1.57398	-1.63472	2.70993	-1.4824	4.07671	4.89677	4.37203	-0.7093	3.48906	5.49702	-1.66156	2.9451	-1.50963	0.121378	3.92272
hsa-let-7c-3p	1.40269	0.153729	5.41985	1.4989e-07	4.39894e-07	6.12229	UP	-1.64092	-1.56057	-1.63331	-1.6019	-0.753	-1.33043	-0.0654457	-1.62016	-0.361248	-1.49655	-1.08331	3.14822	-1.59132	-1.37441	-0.79222	-1.15718	-1.12207	-1.24568	1.72152	-1.45183	1.31294	-1.67642	2.10062	-1.57603	3.10945	-0.135574	-1.65392	1.34568	-1.63472	-1.64422	-1.4824	-1.45027	2.68015	-1.41896	-0.7093	-1.66395	-0.884943	0.969209	-0.622743	-1.50963	-1.60817	-1.14451
hsa-let-7c-5p	-2.46556	0.831949	-8.13843	2.48483e-14	1.43549e-13	21.4431	DOWN	-1.64092	5.30684	1.34849	6.06583	-0.753	5.93222	3.86934	4.98447	-0.361248	-1.49655	-1.08331	0.983343	5.32017	3.32812	-0.79222	-1.15718	5.0076	1.86014	4.51463	4.39909	5.20043	4.54526	3.90356	0.505543	1.58722	3.29069	-0.2045	-1.57398	-1.63472	0.536643	-1.4824	-1.45027	-1.61629	3.81167	-0.7093	3.04843	-0.884943	4.71645	-1.66329	-1.50963	-1.60817	4.03615
hsa-let-7d-3p	1.81525	1.31212	6.52428	4.27849e-10	1.66278e-09	11.842	UP	0.267035	-1.56057	-1.63331	-1.6019	-0.753	-1.33043	-1.63632	2.20953	-0.361248	-1.49655	-1.08331	-1.53249	4.8286	-1.37441	-0.79222	2.92981	-1.12207	2.30408	2.49747	3.42183	3.23573	2.63887	-1.29147	2.39171	1.4609	-1.62534	2.59223	0.65172	3.81843	0.731387	-1.4824	4.4578	3.08775	-1.41896	-0.7093	-1.66395	-0.884943	-1.66156	-1.66329	-1.50963	-1.60817	-1.14451
hsa-let-7d-5p	-2.17031	1.02725	-7.04854	2.07392e-11	9.21943e-11	14.8135	DOWN	-1.64092	4.12405	0.805439	4.79251	-0.753	3.45834	3.4933	3.44543	-0.361248	2.40219	-1.08331	-1.53249	-1.59132	-1.37441	-0.79222	3.16847	5.66581	1.03858	3.38417	4.7827	4.35456	4.59265	-1.29147	1.3252	2.76263	2.2162	0.254585	-1.57398	-1.63472	3.4989	-1.4824	2.23731	2.8798	4.00964	-0.7093	1.81941	4.60472	4.46673	-1.66329	-1.50963	-1.60817	-1.14451
hsa-let-7e-5p	-1.67029	0.616731	-5.71694	3.33675e-08	1.05533e-07	7.58374	DOWN	-1.64092	4.43318	-1.63331	-1.6019	3.82233	5.30684	4.37925	1.50246	-0.361248	1.61827	4.90417	2.30652	2.49239	-1.37441	-0.79222	-1.15718	3.43085	0.66013	5.20251	-1.45183	1.4012	1.83473	2.39614	-1.57603	-1.66137	6.74996	0.957539	-1.57398	-1.63472	-0.184354	-1.4824	-1.45027	-1.61629	1.61168	7.27766	0.344304	3.66736	0.156517	-0.269157	-1.50963	4.86777	4.52617
hsa-let-7f-1-3p	1.94989	1.23053	6.99222	2.89087e-11	1.26537e-10	14.487	UP	-1.64092	5.19608	-1.63331	-1.6019	-0.753	4.15517	-1.63632	-1.62016	-0.361248	-1.49655	-1.08331	-1.53249	2.88446	2.36837	-0.79222	-1.15718	-1.12207	3.67369	-1.63592	-1.45183	1.43015	2.75407	-1.29147	0.581676	0.297787	2.80605	5.45106	4.03246	-1.63472	1.95872	1.55887	-1.45027	-1.61629	-1.41896	-0.7093	-0.254783	-0.884943	0.536643	4.83805	-1.50963	-1.60817	-1.14451
hsa-let-7f-5p	-1.33709	0.117249	-4.60364	6.85783e-06	1.65863e-05	2.42701	DOWN	-1.64092	3.63148	1.5818	4.92449	-0.753	-1.33043	3.61566	1.82205	-0.361248	3.02598	-1.08331	4.65245	-1.59132	-1.37441	-0.79222	2.714	3.582	4.1341	3.78421	-1.45183	0.28163	2.24885	-1.29147	1.39869	-1.66137	-1.62534	0.912717	-1.57398	-1.63472	1.8247	-1.4824	-1.45027	-1.61629	-1.41896	6.14787	-0.329378	3.97192	0.0690065	-1.66329	-1.50963	2.2775	4.82126
hsa-miR-100-5p	-2.17936	1.07362	-7.25806	5.94423e-12	2.75216e-11	16.0427	DOWN	-1.64092	3.71302	1.68078	4.96287	-0.753	3.26271	3.33918	3.04843	-0.361248	2.99727	-1.08331	5.04312	2.25116	-1.37441	-0.79222	3.53429	3.91125	1.51353	4.5339	3.75001	4.83999	1.58451	-1.29147	-1.57603	1.56523	-1.62534	-1.65392	0.632791	-1.63472	3.29647	-1.4824	2.33698	-1.61629	-1.41896	-0.7093	3.58824	-0.884943	4.51115	-1.66329	3.11518	-1.60817	3.2808
hsa-miR-101-3p	-2.43291	0.484927	-8.64829	8.95669e-16	5.84578e-15	24.7273	DOWN	-1.64092	0.909596	0.84247	5.47284	-0.753	4.24811	2.3208	1.3279	-0.361248	-1.49655	-1.08331	5.57283	-1.59132	-1.37441	3.67174	3.40579	4.57409	4.5489	3.87447	2.69107	1.20832	2.00561	-1.29147	3.96013	0.603696	3.12178	3.67781	-1.57398	2.51349	2.84269	-1.4824	-1.45027	-1.61629	-1.41896	-0.7093	2.21374	-0.884943	4.0615	1.46401	3.96013	-1.60817	3.58418
hsa-miR-103a-3p	-4.8466	2.76628	-18.5788	9.99612e-48	4.20329e-46	97.9254	DOWN	-1.64092	4.41143	3.4713	4.93422	6.45623	6.20723	6.24579	5.96559	5.5109	6.32807	4.42444	6.62489	6.07707	6.98822	4.89123	6.35197	6.34335	5.08391	6.20723	6.89867	7.82565	6.92964	5.03943	5.61405	5.3701	5.5781	5.45856	5.47284	1.54313	5.03343	1.924	4.51661	3.68392	6.09062	6.20004	4.67828	4.66539	2.86657	-0.687724	2.52847	6.31169	6.21475
hsa-miR-107	-4.20002	3.13769	-16.3672	1.75192e-40	4.78049e-39	81.3006	DOWN	-1.64092	6.05458	5.21062	5.11327	5.74847	5.61405	6.06192	5.75423	5.58256	6.68167	4.41486	7.29077	6.66236	6.01915	6.03368	6.5971	4.11671	5.30684	5.30265	6.98822	7.62351	6.78104	4.7827	5.65206	5.67689	5.74847	5.76033	4.71292	4.24049	5.34761	3.42183	4.29223	4.4028	6.75993	5.23644	3.987	4.18132	2.00323	1.35636	4.73896	6.74996	5.07453
hsa-miR-10b-5p	-1.6647	0.615751	-5.61586	5.59861e-08	1.71365e-07	7.07982	DOWN	-1.64092	2.28895	5.03547	3.88579	3.5486	-1.33043	2.19389	1.00713	-0.361248	-1.49655	-1.08331	-1.53249	-1.59132	-1.37441	4.7678	-1.15718	-1.12207	2.80384	-0.424357	3.81843	2.03756	2.46166	2.32777	-1.57603	-1.66137	-1.62534	-0.1893	-1.57398	-1.63472	3.00556	-1.4824	-1.45027	-1.61629	-1.41896	-0.7093	3.99094	-0.884943	1.4215	-1.66329	-1.50963	-1.60817	4.7678
hsa-miR-1180-5p	-1.26386	0.624952	-4.62291	6.29977e-06	1.53602e-05	2.50857	DOWN	-0.627309	1.88247	4.23067	-1.6019	-0.753	-1.33043	3.2753	-1.62016	-0.361248	3.74377	4.8173	-1.53249	-1.59132	-1.37441	-0.79222	-1.15718	3.6424	1.16171	3.52087	3.11312	-1.63778	1.62802	-1.29147	3.81548	3.36727	4.06529	-0.424357	3.4561	3.2277	3.32441	3.48503	-1.45027	2.72349	4.13629	-0.7093	-1.66395	3.26271	0.7507	1.06385	1.4012	4.34713	-1.14451
hsa-miR-1182	1.30736	2.29361	4.61615	6.49034e-06	1.57948e-05	2.47993	UP	-1.64092	-1.56057	-1.63331	3.47832	-0.753	-1.33043	3.96013	3.4989	-0.361248	-1.49655	-1.08331	1.13847	0.969209	-1.37441	-0.79222	-1.15718	-1.12207	-0.20677	3.23165	4.38408	1.21525	1.39101	3.2471	-1.57603	-0.881996	1.4609	4.28507	2.92981	3.98129	3.2734	1.71448	1.93943	4.56186	-1.41896	-0.7093	3.51274	3.69958	2.15987	2.95536	3.87816	3.51672	-1.14451
hsa-miR-1184	1.19015	0.397747	4.76696	3.31165e-06	8.35239e-06	3.12732	UP	0.63003	-1.56057	1.28214	-1.6019	-0.753	3.08775	-1.63632	-1.62016	-0.361248	-1.49655	-1.08331	-1.53249	2.99194	-1.37441	-0.79222	-1.15718	-1.12207	-1.30201	-1.63592	-1.45183	-1.63778	1.5485	-1.29147	-1.57603	2.13374	-0.254783	-0.685709	-1.57398	-1.63472	0.900417	-1.4824	-1.45027	-1.61629	-1.41896	-0.7093	-1.12207	-0.884943	1.71448	-1.66329	-1.50963	-1.60817	3.35443
hsa-miR-1185-1-3p	1.25505	7.1909	11.3541	5.01165e-24	5.73878e-23	43.5739	UP	7.30297	5.52551	6.47862	6.26125	5.85785	6.06973	5.91445	6.20723	6.5971	6.24579	7.62964	3.31154	6.954	5.12123	5.4434	5.65485	5.74203	6.64345	6.37834	6.14787	5.77878	6.42195	6.54426	6.81292	6.70052	7.12574	6.68167	6.82289	7.44033	6.5189	7.17558	6.35197	6.5971	4.62652	7.56479	6.74996	7.62351	8.18226	7.83912	8.34582	5.78671	7.82565
hsa-miR-1185-2-3p	1.66093	6.39218	10.0063	8.24573e-20	7.12132e-19	33.9335	UP	6.26125	4.72785	5.93222	-1.6019	5.69342	4.40978	5.11713	5.2913	5.54611	4.6858	7.07717	-1.53249	5.53518	4.74443	5.22825	5.70775	6.5971	6.22958	5.91445	5.64377	4.54103	5.46811	5.7164	6.26546	6.03368	6.07707	5.91445	5.6742	6.78104	6.05458	6.38641	5.52551	6.40475	2.86436	5.60834	6.49668	6.92964	7.71619	7.75579	7.77076	5.17754	7.64764
hsa-miR-1199-3p	1.61784	2.82493	6.09431	4.56981e-09	1.62124e-08	9.52373	UP	-0.216552	-1.56057	1.21178	1.64125	-0.753	3.70739	4.26586	3.53887	-0.361248	3.4032	-1.08331	-1.53249	-1.59132	5.98584	-0.79222	-1.15718	-1.12207	4.39519	3.33033	3.64725	1.90292	4.14167	4.08442	4.3701	4.70561	0.715843	3.81548	2.54188	2.33266	2.06294	2.17636	-1.45027	1.1475	-1.41896	-0.7093	3.25453	-0.884943	2.87528	3.4961	2.02384	1.80887	4.39909
hsa-miR-1200	1.99044	1.46199	7.99358	6.26572e-14	3.48999e-13	20.5299	UP	-1.64092	-1.56057	-1.63331	3.95435	-0.753	2.14735	2.83653	-1.62016	-0.361248	-1.49655	-1.08331	-1.53249	0.316983	-1.37441	-0.79222	3.30675	-1.12207	0.839361	-1.63592	2.13661	0.793539	1.35242	-1.29147	-1.57603	1.27578	2.75019	-1.65392	2.37976	-1.63472	0.4497	-1.4824	3.60072	-1.61629	2.07064	-0.7093	-1.66395	-0.884943	-1.66156	1.95872	3.13509	3.34105	4.60103
hsa-miR-1203	2.88849	5.34287	14.1492	3.8419e-33	7.19305e-32	64.4593	UP	0.23123	-1.56057	2.79935	2.68237	5.07821	4.70739	4.90608	4.66352	4.435	5.1111	3.80184	-1.53249	4.56371	5.09793	5.3701	5.58256	2.97147	3.64483	5.14478	5.39783	4.5299	5.45856	5.45357	4.83233	4.85201	4.83611	4.74857	2.58937	4.5	5.35867	4.51289	4.7408	1.04186	3.96013	4.45388	4.9728	4.84213	4.77136	5.20672	3.75415	4.14363	-1.14451
hsa-miR-1204	2.04433	1.0647	7.61334	6.80108e-13	3.45441e-12	18.1779	UP	4.20627	-1.56057	-1.63331	-1.6019	-0.753	-1.33043	-0.0322261	-1.62016	-0.361248	-1.49655	-1.08331	3.4337	-1.59132	1.96437	3.35015	-1.15718	-1.12207	3.46469	3.20369	-1.45183	-0.366539	2.15508	-1.29147	-1.57603	1.33398	-1.62534	0.793539	-1.57398	-1.63472	-1.64422	3.17544	-1.45027	-0.133072	3.53658	-0.7093	-0.847313	-0.884943	4.54526	3.41973	-1.50963	-1.60817	-1.14451
hsa-miR-1207-3p	2.09154	1.60702	7.7896	2.26982e-13	1.20291e-12	19.2599	UP	-1.64092	-1.56057	-1.63331	1.34849	-0.753	-1.33043	-1.63632	-1.62016	-0.361248	2.72349	-1.08331	-1.53249	-1.59132	-1.37441	-0.79222	-1.15718	-1.12207	2.18873	-1.63592	1.3739	-1.63778	2.09581	-1.29147	2.52346	-1.66137	2.24655	2.17157	-1.57398	4.01862	0.23123	3.26271	-1.45027	-1.61629	-1.41896	-0.7093	-1.66395	-0.884943	0.703248	4.36646	1.8061	-1.60817	-1.14451
hsa-miR-122-5p	-1.83497	2.64595	-5.62869	5.24441e-08	1.61682e-07	7.14343	DOWN	1.56808	-1.56057	-0.310426	7.9113	4.20982	5.72552	3.84144	5.27307	-0.361248	4.5019	3.56173	2.59759	7.08956	3.82233	4.82682	3.6089	-1.12207	2.2162	2.94675	4.42444	4.75642	4.57222	3.48906	4.90608	6.11798	3.9303	5.87065	-1.57398	4.29763	-0.0322261	5.36518	2.15987	5.9265	5.95214	6.72043	1.60497	3.75616	2.72115	1.27578	-1.50963	9.00229	3.80361
hsa-miR-1226-5p	-1.07181	1.7028	-3.72451	0.000246053	0.000496168	-0.983364	DOWN	-1.64092	-1.56057	4.4578	3.60072	-0.753	-1.33043	4.36646	3.39876	4.78083	4.89853	4.83611	-1.53249	5.54611	5.13694	3.40098	3.89441	3.65738	4.18132	4.91455	3.90711	3.11725	3.84871	3.54362	-1.57603	3.68744	3.97373	4.71469	0.570754	2.62586	-0.248661	1.34011	-1.45027	1.77686	4.65245	3.59647	-1.04748	4.23676	5.00575	3.77044	-1.50963	-1.60817	3.75214
hsa-miR-1227-3p	1.4254	2.00155	5.22763	3.84241e-07	1.07128e-06	5.20888	UP	-1.64092	2.78484	5.69614	4.38248	4.46162	-1.33043	2.2805	3.33033	-0.361248	-1.49655	4.0921	3.46469	3.26789	3.4989	-0.79222	3.10945	3.56606	-1.67499	-1.63592	-1.45183	-1.63778	0.0197087	3.4032	3.84144	0.21502	1.09418	2.31347	3.48503	2.64347	1.90742	3.12864	-1.45027	1.97928	-1.41896	-0.7093	1.02527	-0.884943	0.6918	1.53316	-1.50963	3.16392	-1.14451
hsa-miR-1228-5p	1.41906	11.2688	32.2828	1.55696e-87	1.3312e-84	189.176	UP	10.8541	10.9742	10.7731	10.1812	10.6332	10.5257	11.0203	10.7312	10.7731	10.4908	10.5613	10.2631	10.3849	10.7312	10.7731	10.1812	10.4543	10.9742	10.6977	10.4543	10.3402	10.8541	10.7731	10.6332	10.7312	10.7312	10.9346	10.6487	10.8541	11.0708	10.6642	10.8153	10.6332	10.8153	10.9742	11.0203	11.0203	10.7731	10.8153	10.9742	10.6977	10.8541
hsa-miR-1229-3p	1.08634	4.87888	7.18214	9.37231e-12	4.28571e-11	15.5946	UP	5.07453	4.47817	4.20627	5.07022	5.58763	2.2231	4.70383	5.24986	5.49702	5.3378	3.41062	-1.53249	5.29344	5.31574	5.48829	-1.15718	3.56606	3.91911	5.33351	5.20672	4.9728	5.18151	5.19835	5.19184	5.1152	5.15908	5.393	4.56371	5.37939	5.11713	5.393	5.73613	4.82505	4.88323	-0.7093	5.19381	5.41127	5.85785	3.82233	4.94937	4.74443	4.57768
hsa-miR-1231	1.32768	6.52958	9.69195	7.45335e-19	5.88241e-18	31.7501	UP	6.30348	5.61405	4.84843	5.17754	6.06192	6.23772	5.95541	6.49207	6.26125	5.74203	4.48196	-1.53249	6.9407	6.20004	6.99927	5.85785	-1.12207	5.4634	4.27811	6.12597	6.06973	6.11798	5.8768	5.79527	6.57914	5.97244	5.90816	5.99586	5.67957	6.09062	6.03672	6.01915	5.74847	5.4434	4.88323	5.76033	6.20723	6.24579	6.52722	3.29647	5.88274	5.13343
hsa-miR-1233-5p	-1.18516	11.378	-14.5295	2.11856e-34	4.18008e-33	67.3456	DOWN	10.8938	10.8938	12.1357	11.4732	11.3691	11.2642	12.5117	11.4732	11.2138	11.9209	11.8722	11.0708	11.9209	11.6887	11.1179	12.1357	12.1357	12.6493	12.5838	12.2507	11.9209	11.8006	11.8722	12.375	12.5838	13.1079	13.1669	12.2507	13.3043	12.5117	12.2507	12.5117	13.014	12.375	12.5838	12.2507	12.375	12.4434	11.9209	12.8165	12.2507	12.375
hsa-miR-1236-3p	1.99814	3.94697	8.69946	6.38109e-16	4.22933e-15	25.0626	UP	3.59039	4.94738	4.27126	4.67648	5.11713	4.99592	4.20804	2.89601	-0.361248	4.58883	-1.08331	3.01555	3.91718	5.50835	3.88913	4.25173	-1.12207	4.61993	4.82315	3.8601	4.18306	4.50768	3.91525	4.56	4.40978	4.44104	4.62141	5.24986	4.30392	4.32398	4.81341	3.62258	4.32914	-1.41896	-0.7093	5.17754	-0.884943	3.33253	3.46708	1.90292	5.10149	3.61329
hsa-miR-1236-5p	2.54028	4.24409	9.78325	3.94382e-19	3.24228e-18	32.3812	UP	0.226878	5.11327	1.18783	2.35547	4.36253	2.28895	4.22473	5.18562	-0.361248	3.79798	3.1445	5.61405	2.90043	5.52078	4.34557	2.73246	-1.12207	0.47727	3.49118	1.49141	3.34353	5.44855	4.11671	2.90838	3.24299	4.24616	6.19228	3.50839	2.67792	5.4927	4.38408	4.03246	3.8601	5.11327	4.92449	7.18754	6.69116	4.70739	5.46811	4.93422	3.99436	-1.14451
hsa-miR-1237-3p	1.15638	5.08469	6.50883	4.66715e-10	1.79479e-09	11.7568	UP	6.28217	6.22958	4.81535	2.92444	4.84843	5.36764	5.39783	5.83986	5.36518	5.31109	4.40594	2.78077	4.3112	5.393	5.56246	3.8263	-1.12207	4.92252	4.86379	5.52078	5.44855	5.11327	4.91455	5.74847	5.43913	5.12913	5.56735	5.23223	5.79237	5.58256	5.97244	4.82315	4.60472	2.52847	-0.7093	5.60577	4.64901	4.95715	5.55474	6.19228	5.56246	3.17544
hsa-miR-1238-3p	1.06556	4.69486	6.54755	3.75238e-10	1.48075e-09	11.9706	UP	3.03438	3.68952	4.94345	4.45211	4.96895	4.90225	5.05887	5.74203	-0.361248	5.63523	2.75019	3.67564	5.66864	2.3185	4.66726	3.14822	5.25809	4.55293	5.27977	3.54362	5.14283	5.0314	5.12913	4.63795	3.9831	3.88913	4.15145	3.99993	4.37925	4.64146	4.5019	4.68177	4.70739	1.58722	-0.7093	5.14678	4.93023	5.23433	4.52434	-1.50963	4.5319	4.35456
hsa-miR-1238-5p	-1.05514	6.80479	-12.8183	9.23397e-29	1.3851e-27	54.4166	DOWN	6.56963	7.30297	7.73003	7.99923	6.75993	7.13178	7.37779	7.00951	7.21241	7.40263	7.36533	7.03251	7.70433	7.39062	7.43362	7.53124	7.9113	7.44033	7.70433	7.37779	6.85468	6.99927	7.5187	7.73003	7.35223	7.39062	7.59813	7.5187	7.64764	7.42691	7.54583	7.70433	8.01548	7.18754	6.18432	7.55832	7.78486	7.67375	7.49237	7.95389	7.2303	7.75579
hsa-miR-124-3p	-4.2112	3.28016	-20.4527	9.85416e-54	6.48101e-52	111.711	DOWN	2.24219	4.98447	5.36057	6.25329	6.20004	4.17945	5.20672	4.8173	-0.361248	4.7908	5.59523	6.44735	5.16716	5.46098	5.36057	6.11074	4.56533	6.16939	5.7164	5.33351	5.64377	5.66297	5.16716	5.88274	5.64091	5.393	5.68502	5.70189	6.65388	5.64091	5.51554	5.86461	6.1037	5.64091	5.88576	5.61405	6.08348	5.43913	4.1848	4.67093	4.27126	5.97948
hsa-miR-1245a	-1.68532	0.215288	-6.16842	3.06148e-09	1.10914e-08	9.91531	DOWN	-1.64092	1.39101	-1.63331	4.5489	-0.753	2.70088	0.372383	4.24421	-0.361248	-1.49655	-1.08331	2.16242	4.20627	4.32749	3.52911	5.76033	4.22873	4.10202	-0.351691	-1.45183	2.18873	-1.67642	-1.29147	3.96448	-0.736809	-1.62534	-1.65392	-1.57398	-1.63472	1.57707	-1.4824	1.66324	-1.61629	1.61827	-0.7093	-1.66395	-0.884943	1.87797	-1.66329	4.77721	3.7621	5.32916
hsa-miR-1245b-5p	-1.08997	-0.432238	-4.74421	3.66935e-06	9.19129e-06	3.02854	DOWN	-0.561517	-1.56057	3.69958	2.55161	-0.753	-1.33043	0.0834609	-1.62016	-0.361248	-1.49655	-1.08331	-1.53249	-1.59132	3.07847	-0.79222	-1.15718	-1.12207	1.60157	3.77799	3.02598	-1.63778	-1.55882	-1.29147	-1.57603	2.12477	-1.62534	-0.768404	2.90233	0.2734	-1.64422	2.17636	2.76263	4.55472	4.37203	-0.7093	-0.843939	-0.884943	-1.66156	5.0076	-1.50963	-1.60817	-1.14451
hsa-miR-1246	-7.46283	6.02353	-24.161	3.9264e-65	5.30063e-63	137.865	DOWN	8.24849	9.02374	9.62635	9.53519	9.84625	10.0911	10.6642	9.74785	9.30392	11.1643	8.82378	10.0911	10.136	10.5257	8.8467	10.7312	9.77904	10.136	10.4908	10.5955	10.5955	10.3849	10.1812	10.4543	10.1136	11.3691	10.1812	9.81193	9.77904	10.0911	9.77904	9.74785	10.4227	10.6332	9.59648	10.5955	9.21144	7.77076	7.81216	9.18815	10.8153	8.93129
hsa-miR-1249-5p	1.8415	6.97568	13.9685	1.52006e-32	2.78496e-31	63.0896	UP	5.02757	6.68167	5.21932	2.82907	4.5565	6.11798	5.73613	6.19228	5.41586	6.57914	4.26767	6.04693	6.26125	5.51554	6.22958	5.28468	-1.12207	6.16198	6.77033	7.13781	6.43103	6.15511	6.39588	6.13301	7.36533	6.32807	6.15511	6.34335	6.70052	5.66297	6.35197	6.15149	5.8461	4.20982	5.68502	6.87665	5.20867	7.1997	5.90175	6.56139	6.57914	4.72972
hsa-miR-1250-3p	2.4532	2.12585	9.32852	9.16756e-18	6.91612e-17	29.2629	UP	2.29651	3.2772	4.36057	-1.6019	-0.753	3.4989	-0.261646	2.28895	-0.361248	-1.49655	4.80386	-1.53249	-1.59132	-1.37441	-0.79222	-1.15718	4.10662	-0.124609	-1.63592	-1.45183	2.90043	4.0689	2.80826	2.08149	-1.66137	2.18873	1.3306	4.5319	4.89312	0.271187	2.66273	2.80826	2.42921	1.70152	-0.7093	2.79216	4.8173	-1.66156	2.79935	-1.50963	2.29345	-1.14451
hsa-miR-1251-3p	1.01919	0.451153	3.8017	0.000183963	0.000377794	-0.709045	UP	0.560822	1.0099	2.58325	-1.6019	-0.753	-1.33043	0.615457	5.00389	-0.361248	-1.49655	-1.08331	1.48842	-1.59132	4.54103	-0.79222	3.25453	-1.12207	-1.67499	-1.63592	-1.45183	-1.63778	-1.67642	-1.29147	0.711143	-1.66137	1.90742	1.64125	3.35843	-1.63472	3.30914	3.89261	-1.45027	2.68672	-1.41896	-0.7093	-1.66395	5.03943	-1.66156	-1.66329	-1.50963	-1.60817	-1.14451
hsa-miR-1255b-5p	-1.18825	-0.798553	-5.88663	1.37965e-08	4.60182e-08	8.44477	DOWN	-1.64092	1.50568	2.55954	0.396874	-0.753	5.05061	2.95302	0.962887	-0.361248	-1.49655	-1.08331	-1.53249	-1.59132	-1.37441	-0.79222	-1.15718	-1.12207	-1.67499	2.46166	-1.45183	0.903446	-0.689739	-1.29147	-1.57603	-1.66137	-1.62534	-1.65392	-1.57398	-1.63472	-1.64422	1.15053	-1.45027	-1.61629	-1.41896	-0.7093	-1.66395	-0.884943	-1.66156	-1.15718	-1.50963	-1.60817	5.07022
hsa-miR-125a-3p	3.737	5.06212	15.1741	1.55304e-36	3.40475e-35	72.2427	UP	5.44127	3.2808	2.33482	-1.6019	-0.753	3.94113	4.59265	3.6916	-0.361248	2.2231	3.84871	1.81372	4.09782	4.44634	4.39519	-1.15718	-1.12207	4.01495	3.95251	3.48705	3.29254	3.36525	4.36253	3.02197	5.13343	1.7261	4.89123	4.80767	5.01395	3.67999	5.05061	3.3135	-1.61629	5.27307	4.56371	2.92092	-0.884943	4.66539	4.60103	4.26017	4.24811	5.20672
hsa-miR-125a-5p	1.33871	2.25604	4.85335	2.23612e-06	5.71849e-06	3.50584	UP	4.87741	-1.56057	3.8263	3.01747	-0.753	7.21838	-1.63632	4.26017	-0.361248	4.52617	-1.08331	-1.53249	-1.59132	-1.37441	3.76407	3.21939	4.28507	4.18812	1.34287	-1.45183	2.5443	3.94484	-1.29147	3.02598	3.03649	2.92981	-1.65392	3.35443	1.28821	0.0814	1.74914	2.98375	-1.61629	5.03943	4.62652	-0.37377	-0.884943	3.00556	-0.0504478	-1.50963	-1.60817	3.94113
hsa-miR-125b-1-3p	5.13748	2.13456	18.6091	7.9755e-48	3.40953e-46	98.1505	UP	-1.64092	2.17882	-1.63331	-1.6019	-0.753	-1.33043	-1.63632	2.39917	-0.361248	-1.49655	-1.08331	-1.53249	-1.59132	-1.37441	-0.79222	-1.15718	-1.12207	3.89441	1.59521	-1.45183	-1.63778	-0.8949	-1.29147	2.72795	1.1475	1.86953	2.16496	-1.57398	3.25453	-1.64422	-1.4824	-1.45027	-1.61629	-1.41896	-0.7093	4.20982	-0.884943	4.29223	-1.06941	-1.50963	-1.60817	-1.14451
hsa-miR-125b-5p	1.25589	1.45917	4.35793	1.97716e-05	4.55654e-05	1.41187	UP	-0.141509	4.77896	-1.63331	1.73728	-0.753	4.5299	3.39876	1.36244	-0.361248	-1.49655	-1.08331	-1.53249	2.20483	-1.37441	-0.79222	-1.15718	-1.12207	-1.3453	-1.63592	-1.45183	-1.63778	3.187	4.55293	-1.57603	-1.66137	2.58937	-0.547117	-1.57398	-1.63472	1.86447	-1.4824	2.24219	-1.61629	6.5367	-0.7093	3.9831	-0.884943	-1.66156	-1.66329	-1.50963	4.33486	-1.14451
hsa-miR-126-3p	-2.47682	1.23644	-8.48525	2.62062e-15	1.66796e-14	23.6657	DOWN	3.4933	3.44334	-1.63331	3.26986	3.96828	3.63781	3.14218	3.55759	4.63058	4.35456	-1.08331	4.19573	4.9377	2.84856	5.31574	4.87946	3.85039	4.31472	3.55274	3.66512	5.30684	4.66352	-1.29147	4.02437	0.764248	4.56186	4.87536	0.988487	-1.63472	2.24219	-1.4824	4.1203	2.66971	5.69342	5.18357	0.603696	-0.884943	-1.66156	-1.66329	-1.50963	-1.60817	2.51893
hsa-miR-1260b	-1.48926	8.79268	-18.8362	1.46759e-48	6.49031e-47	99.8378	DOWN	9.18815	9.11859	8.71606	9.18815	9.32848	9.21144	8.0583	9.4523	9.9254	9.18815	10.0911	9.30392	10.3025	9.47975	9.86458	9.74785	9.96219	10.2631	9.28104	9.23446	9.42722	8.47876	9.42722	9.59648	9.30392	9.77904	9.50618	9.77904	9.42722	9.59648	9.18815	8.57424	9.71488	8.80225	10.3849	9.47975	8.7593	9.11859	9.16403	9.04921	9.32848	9.62635
hsa-miR-1266-3p	2.5048	1.7097	9.97044	1.06153e-19	9.137e-19	33.6829	UP	2.97524	0.853713	1.86953	-1.6019	-0.753	-1.33043	3.10723	3.4933	-0.361248	-1.49655	-1.08331	-1.53249	1.3252	-1.37441	-0.79222	-1.15718	-1.12207	-1.02051	0.458239	-1.45183	2.03073	-1.55341	3.59254	3.08982	0.0197087	2.99194	2.6084	2.2775	4.03246	0.926826	-1.4824	-1.45027	-1.61629	-1.41896	4.02047	-1.66395	-0.884943	-1.66156	-0.59532	2.7302	0.648109	-1.14451
hsa-miR-1266-5p	1.56697	0.999368	5.6999	3.64261e-08	1.14501e-07	7.49831	UP	4.85963	-1.56057	-1.63331	-1.6019	-0.753	-1.33043	-0.254783	-1.62016	-0.361248	-1.49655	-1.08331	1.60497	0.825113	-1.37441	-0.79222	-1.15718	-1.12207	3.64483	4.03968	-1.45183	1.77187	0.619265	-1.29147	3.31545	0.0249217	2.80605	2.98971	-1.57398	-1.63472	-1.64422	3.41764	-1.45027	-1.61629	3.4623	-0.7093	-0.579943	-0.884943	2.88802	-1.05672	-1.50963	1.31948	-1.14451
hsa-miR-1267	1.93312	0.604024	7.48304	1.51665e-12	7.42404e-12	17.3876	UP	-1.64092	-1.56057	-1.63331	7.68892	4.70739	-1.33043	0.7507	-1.62016	-0.361248	-1.49655	-1.08331	-1.53249	-1.59132	-1.37441	4.32584	-1.15718	-1.12207	-1.67499	-0.419443	-1.45183	-0.443174	-1.4346	-1.29147	-1.57603	4.0921	0.134702	-1.65392	-1.57398	0.22193	-1.64422	3.4713	5.2413	-1.61629	-1.41896	-0.7093	-1.66395	-0.884943	-1.66156	2.89601	-1.50963	-1.60817	-1.14451
hsa-miR-1268a	1.05172	10.8214	24.0022	1.16801e-64	1.49797e-62	136.779	UP	10.2631	10.1812	9.6535	9.81193	10.4908	10.4543	9.9254	10.3025	10.3402	10.3214	10.5955	9.96219	10.5257	10.4908	10.4543	10.2631	10.0451	10.1812	10.0911	9.96219	10.3849	10.3402	10.2185	10.5257	10.4543	10.3402	10.6642	10.2185	10.2185	10.5257	10.4227	10.4227	9.84625	10.4227	10.8938	10.4908	10.7312	10.6332	10.5613	10.3849	10.2408	10.4543
hsa-miR-1268b	1.08303	9.64529	29.1556	2.50897e-79	9.19357e-77	170.396	UP	9.02374	8.93129	8.65844	8.62172	9.18815	9.23446	8.80225	9.21144	9.37804	9.09504	8.92087	9.07314	9.04921	9.09504	8.86813	8.82378	8.80225	9.07314	8.86813	8.86813	9.16403	9.00229	8.82378	9.23446	9.18815	9.13985	9.13985	9.21144	9.18815	9.42722	9.22295	9.11859	8.88919	9.42722	9.09504	9.38982	9.36516	9.24566	9.21144	8.88919	8.95476	8.95476
hsa-miR-1273a	1.8108	2.2863	6.3448	1.16491e-09	4.343e-09	10.8608	UP	-1.64092	3.70739	-1.63331	0.358346	-0.753	-1.33043	-0.124609	4.50575	-0.361248	3.0386	-1.08331	-1.53249	-1.59132	-1.37441	-0.79222	-1.15718	-1.12207	3.4806	3.99094	3.84144	2.84856	1.8873	-1.29147	3.61329	3.45834	-1.62534	5.64663	5.09793	4.13629	3.66108	-1.4824	-1.45027	3.14822	-1.41896	5.5649	2.6536	-0.884943	4.47159	1.62158	3.23573	4.5	-1.14451
hsa-miR-1273c	3.13226	2.37067	11.66	5.26421e-25	6.42986e-24	45.8138	UP	2.36632	-1.56057	-1.63331	3.16151	-0.753	-1.33043	-1.63632	-1.62016	-0.361248	-1.49655	-1.08331	-1.53249	0.447037	3.73966	-0.79222	-1.15718	10.7312	1.08436	-1.63592	-1.45183	1.00076	-0.0025	-1.29147	-1.57603	-1.66137	-1.62534	-1.65392	-1.57398	-0.158965	-1.64422	1.3252	2.39614	-1.61629	2.82176	4.05054	-1.66395	-0.884943	4.93023	-1.66329	3.96013	2.90838	4.4028
hsa-miR-1273g-3p	-1.00028	7.74957	-11.7087	3.67307e-25	4.52953e-24	46.1717	DOWN	8.18226	7.44033	7.88185	8.07172	8.28178	8.10339	8.07172	8.47876	8.37758	9.88292	8.11801	7.82565	8.47876	8.32963	7.92593	8.80225	6.76513	7.49237	8.0894	8.39614	8.44524	7.8526	7.73003	8.2142	7.87493	8.24849	9.18815	9.06118	7.868	7.60428	8.16719	7.79728	7.91862	7.27766	10.5257	8.2649	7.46683	7.36533	7.27766	7.34033	9.53519	7.06565
hsa-miR-1273h-3p	1.96561	1.92323	7.51854	1.21992e-12	6.06411e-12	17.6021	UP	5.03343	-1.56057	-1.63331	-1.6019	-0.753	-1.33043	1.38479	2.98375	-0.361248	2.09333	-1.08331	-1.53249	-1.59132	4.5319	-0.79222	-1.15718	-1.12207	-1.67499	1.97666	2.91739	1.95392	3.6916	3.68744	2.73631	0.979689	4.11309	-0.520574	3.2753	3.56173	-1.64422	-1.4824	-1.45027	2.55954	-1.41896	4.27467	-0.566961	4.54103	3.95618	5.54611	5.32442	1.89233	3.28883
hsa-miR-1273h-5p	2.34202	2.51354	8.9528	1.17465e-16	8.40089e-16	26.7373	UP	0.937652	-1.56057	3.2945	-1.6019	-0.753	4.5565	-1.63632	-1.62016	-0.361248	3.032	-1.08331	1.90973	4.05054	-1.37441	-0.79222	-1.15718	-1.12207	3.35643	-1.63592	1.3594	2.26082	-1.0117	2.10772	-1.57603	-1.66137	0.988487	5.3378	2.32311	1.22297	3.75001	2.58	3.32812	2.49493	3.56816	4.03968	-1.66395	3.54362	4.12966	0.0720478	-1.50963	4.80581	-1.14451
hsa-miR-128-1-5p	1.35191	6.78854	11.3124	6.8035e-24	7.65394e-23	43.2701	UP	6.89867	5.74847	6.03021	5.44855	6.52722	6.16198	6.70994	5.93531	5.12513	6.32009	5.40466	6.66236	6.05458	6.43899	7.28422	6.43103	6.43103	6.11074	5.80161	6.5529	6.74996	6.8879	6.57914	6.38641	5.70189	6.16198	5.79527	6.26966	6.08348	6.07707	6.48333	5.91763	5.52078	6.77033	4.6858	5.62992	5.82705	5.95214	6.66236	4.85785	6.77033	4.92252
hsa-miR-128-3p	-1.00572	0.3856	-3.63606	0.000341397	0.000672052	-1.29154	DOWN	-1.64092	2.99194	1.0872	4.49081	4.435	-1.33043	-1.63632	3.36727	-0.361248	-1.49655	-1.08331	-1.53249	-1.59132	-1.37441	-0.79222	3.38779	-1.12207	0.867178	-1.63592	1.89658	-1.63778	0.455752	-1.29147	-1.57603	-0.524798	0.860504	2.88802	-1.57398	-1.63472	2.31599	-1.4824	-1.45027	-1.61629	2.97524	-0.7093	4.15708	-0.884943	-1.66156	2.15987	3.47604	4.01495	-1.14451
hsa-miR-1281	1.04754	5.09516	6.86638	6.03564e-11	2.57167e-10	13.7638	UP	5.3701	3.90356	3.26986	-1.6019	5.66864	5.33351	4.86777	5.11327	5.16531	5.64663	5.66297	4.84635	4.64146	4.29952	4.86969	2.66273	3.36727	4.32749	5.43913	5.53277	5.48081	5.31574	5.56246	4.90225	4.89502	5.67142	5.65764	5.36057	5.02948	5.52078	5.67957	5.13694	2.80605	2.7052	3.8432	5.42476	5.70189	3.987	5.66297	3.5227	3.46708	3.39876
hsa-miR-1284	1.10947	0.156842	4.48779	1.13603e-05	2.68315e-05	1.94256	UP	3.78204	-1.56057	2.07611	-1.6019	-0.753	-1.33043	-1.63632	-1.62016	-0.361248	2.74543	-1.08331	-1.53249	1.75225	-1.37441	-0.79222	-1.15718	-1.12207	-1.67499	-1.63592	-1.45183	-1.63778	2.68672	-1.29147	-1.57603	0.500352	-0.303317	-1.65392	-1.57398	-1.63472	-1.64422	-1.4824	-1.45027	-1.61629	-1.41896	-0.7093	-1.66395	-0.884943	-1.66156	-1.66329	-1.50963	-1.60817	-1.14451
hsa-miR-1285-5p	1.15544	0.0703029	4.89007	1.88936e-06	4.88036e-06	3.66841	UP	-1.64092	-1.56057	-0.329378	0.433474	-0.753	-1.33043	0.757757	0.183704	-0.361248	2.59759	-1.08331	-1.53249	-1.59132	-1.37441	-0.79222	-1.15718	-1.12207	0.468437	-1.63592	-1.45183	-1.63778	-1.67642	-1.29147	3.84496	-1.66137	-1.62534	-1.65392	3.60677	-1.63472	4.35862	4.03791	3.4806	1.44863	3.28687	-0.7093	1.90742	-0.884943	-1.66156	-1.66329	-1.50963	-1.60817	-1.14451
hsa-miR-1286	-1.12913	1.44922	-3.73874	0.00023329	0.000473409	-0.933167	DOWN	-1.64092	5.42476	2.6536	5.12913	5.77261	3.24133	4.66539	-1.62016	-0.361248	4.17757	3.2277	2.29345	-1.59132	-1.37441	-0.79222	-1.15718	-1.12207	1.01877	4.5869	-1.45183	-0.436817	2.26082	-1.29147	3.36525	1.45453	-0.216552	1.90973	4.34023	2.9451	1.89658	2.86657	-1.45027	-1.61629	2.16924	5.50161	-1.66395	4.59265	2.54939	3.06573	3.18904	2.85817	4.70208
hsa-miR-129-1-3p	1.18984	0.700677	4.30947	2.42358e-05	5.52085e-05	1.21723	UP	1.98383	-1.56057	-1.63331	-1.6019	-0.753	2.42921	-1.63632	2.20483	-0.361248	-1.49655	-1.08331	-1.53249	3.89621	3.58824	-0.79222	-1.15718	-1.12207	3.19786	3.5486	3.0751	1.22297	-1.12207	-1.29147	-1.57603	1.41789	-0.0677913	-1.65392	-1.57398	2.95302	-1.64422	3.8601	-1.45027	-1.61629	-1.41896	-0.7093	-1.66395	-0.884943	4.08063	-1.66329	-1.50963	1.73186	-1.14451
hsa-miR-129-2-3p	1.70196	0.925327	6.61776	2.52129e-10	1.00734e-09	12.3605	UP	3.20369	-1.56057	2.33482	3.60072	-0.753	-1.33043	-1.63632	0.307704	5.32442	3.76407	-1.08331	1.22297	-1.59132	1.86014	-0.79222	-1.15718	-1.12207	-1.67499	2.89822	2.4432	-1.63778	1.27896	-1.29147	-1.57603	-1.66137	3.13509	1.01268	1.72863	-0.449087	-1.64422	-1.4824	-1.45027	-1.61629	-1.41896	-0.7093	-1.19352	-0.884943	3.34105	0.91977	-1.50963	-1.60817	-1.14451
hsa-miR-129-5p	1.3811	1.48934	4.88613	1.92394e-06	4.95472e-06	3.65091	UP	4.24421	3.98505	1.41516	4.06709	-0.753	-1.33043	-1.63632	4.53782	-0.361248	3.80361	4.28507	2.05973	3.55274	3.71929	3.95049	4.05801	-1.12207	2.76909	0.731387	-1.45183	3.2772	-0.0734217	-1.29147	-1.57603	-1.66137	-1.62534	2.74067	-1.57398	4.29763	-1.64422	-1.4824	-1.45027	-1.61629	-1.41896	-0.7093	1.26318	3.66108	4.02437	4.07277	2.09077	3.50427	-1.14451
hsa-miR-1290	-4.96269	7.36295	-17.6889	7.91122e-45	2.77976e-43	91.273	DOWN	8.97867	10.5955	10.4227	11.4216	9.55126	9.46603	9.28104	9.56733	10.3025	10.136	10.4227	11.5336	10.4908	10.0451	10.136	11.1179	11.6381	10.5955	11.1643	10.3849	9.50618	9.81193	9.74785	10.2631	9.62635	10.0451	10.3849	10.6977	10.4908	10.3025	10.1812	10.6977	11.0203	9.21144	8.97867	9.56733	9.74785	8.80225	8.95476	10.0023	9.25687	9.42722
hsa-miR-1293	2.72864	1.47112	11.321	6.38836e-24	7.2505e-23	43.3326	UP	2.09077	-1.56057	1.58722	-1.6019	-0.753	-1.33043	-0.288387	-1.62016	-0.361248	1.4012	-1.08331	-1.53249	2.27166	-1.37441	-0.79222	-1.15718	-1.12207	-1.67499	-1.63592	3.16151	-1.63778	5.01212	-1.29147	-1.57603	-1.66137	-1.62534	-1.65392	-1.57398	2.68455	0.108926	-1.4824	1.61827	-1.61629	3.67174	5.55209	1.94437	-0.884943	0.271187	1.55372	-1.50963	-1.60817	-1.14451
hsa-miR-1295b-5p	-1.22737	0.632967	-4.4441	1.37074e-05	3.21679e-05	1.76255	DOWN	4.4578	1.42511	5.86461	3.91525	-0.753	-1.33043	-1.63632	1.53316	-0.361248	4.1203	4.138	-1.53249	-1.59132	4.84843	3.31545	-1.15718	-1.12207	2.20206	2.54939	-1.45183	1.86014	1.9939	3.13987	4.16242	2.69107	3.23165	-1.65392	3.4561	1.9939	1.38479	-1.4824	2.37976	-1.61629	2.91739	-0.7093	1.98883	3.14822	3.12178	3.42855	-1.50963	-1.60817	4.12966
hsa-miR-1296-5p	1.81514	1.88428	6.66063	1.97509e-10	8.00333e-10	12.6	UP	-1.64092	-1.56057	-1.63331	5.09153	4.04306	-1.33043	-1.63632	1.28214	-0.361248	-1.49655	-1.08331	-1.53249	2.77628	-1.37441	-0.79222	-1.15718	-1.12207	4.81535	1.73948	2.04498	1.12166	-0.564239	3.9303	-1.57603	4.77342	0.609483	0.839361	-1.57398	3.38417	3.2471	2.71882	3.97947	-1.61629	2.63375	-0.7093	2.11964	-0.884943	-1.66156	1.6607	2.13949	0.722352	-1.14451
hsa-miR-1303	3.01432	1.95894	10.5237	2.08081e-21	1.99152e-20	37.5851	UP	-1.64092	4.68938	-1.63331	-1.6019	-0.753	-1.33043	-1.63632	3.16633	-0.361248	-1.49655	3.29254	-1.53249	0.311709	-1.37441	-0.79222	-1.15718	-1.12207	1.54065	2.96003	-1.45183	3.41764	1.13847	-1.29147	3.73546	0.00522609	0.291774	9.53519	6.65388	-1.63472	2.50615	-1.4824	4.68938	-1.61629	-1.41896	6.954	-1.66395	-0.884943	4.20255	4.02437	-1.50963	-1.60817	-1.14451
hsa-miR-1304-3p	2.42463	2.31802	9.73208	5.63611e-19	4.56045e-18	32.0272	UP	2.3751	1.57093	-1.63331	-1.6019	-0.753	3.36727	2.09077	0.889785	-0.361248	-1.49655	-1.08331	3.26986	-1.59132	-1.37441	5.11918	-1.15718	2.61326	-1.36061	2.90422	-1.45183	3.83797	2.20953	-1.29147	1.28821	2.60586	2.43653	1.96155	3.95435	2.15227	4.20441	2.57046	-1.45027	4.27467	2.78077	-0.7093	1.93943	4.49633	0.886648	1.2698	-1.50963	2.91367	-1.14451
hsa-miR-1304-5p	1.25815	-0.343373	5.19971	4.3963e-07	1.21514e-06	5.07839	UP	-1.64092	-1.56057	-1.63331	-1.6019	-0.753	-1.33043	-1.63632	-1.62016	-0.361248	-1.49655	-1.08331	-1.53249	-1.59132	-1.37441	-0.79222	4.45388	-1.12207	-0.526717	-1.63592	-1.45183	-1.63778	-1.61404	-1.29147	-1.57603	-1.66137	-1.62534	-1.65392	-1.57398	-1.63472	0.722352	-1.4824	-1.45027	-1.61629	-1.41896	-0.7093	-1.66395	-0.884943	1.06997	2.37042	-1.50963	-1.60817	-1.14451
hsa-miR-1305	-1.8172	0.463883	-6.2363	2.11528e-09	7.76207e-09	10.2769	DOWN	-1.64092	3.43085	-1.63331	4.20255	-0.753	2.92444	2.73631	0.495617	-0.361248	3.92829	-1.08331	2.9946	1.72152	-1.37441	-0.79222	-1.15718	4.88323	2.87528	4.13629	3.79383	0.731387	1.1749	-1.29147	1.4449	-1.66137	-1.62534	-1.65392	-1.57398	1.6249	1.58722	2.07611	3.19339	1.55372	-1.41896	-0.7093	-1.66395	-0.884943	-1.66156	-1.66329	-1.50963	4.39171	6.1407
hsa-miR-1306-5p	1.27651	4.22066	5.61673	5.57374e-08	1.70808e-07	7.08415	UP	3.81548	1.69478	3.5486	3.66287	-0.753	5.07453	5.50161	4.93023	-0.361248	4.87946	5.6742	3.90166	2.92444	5.03547	4.46673	2.86657	-1.12207	2.5212	5.61951	3.25058	5.01968	4.7408	4.05463	5.31574	4.85785	4.94153	4.57409	3.82987	4.59265	3.8601	4.94738	5.44127	4.97087	2.05673	-0.7093	3.05715	4.42771	3.51672	4.84843	4.91886	3.80973	4.66352
hsa-miR-1307-3p	-2.55846	7.37888	-26.7776	9.7317e-73	2.26926e-70	155.303	DOWN	8.54948	9.37804	7.59813	7.50615	8.95476	8.63905	9.53519	9.88292	8.15064	7.92593	8.49513	8.67584	8.51401	8.63905	8.97867	6.19228	7.88939	8.74867	8.73805	9.07314	8.60238	9.35229	9.47975	9.09504	8.38686	7.83912	7.50615	9.09504	9.28104	9.00229	9.16403	9.18815	9.11859	9.84625	7.2493	9.07314	8.53094	7.62351	9.74785	9.56733	9.07314	8.62172
hsa-miR-130a-3p	-3.50849	1.53147	-12.6116	4.37013e-28	6.51709e-27	52.8697	DOWN	4.03615	5.02152	5.23024	4.82682	5.27523	5.66864	4.74857	4.1341	4.66352	5.13343	4.99216	5.48305	5.64663	4.19375	4.87946	5.03745	-1.12207	4.50381	-1.63592	5.36057	5.9208	5.53037	-1.29147	3.70551	5.15252	4.47159	4.76047	2.96661	0.0143087	3.9831	3.3373	-1.45027	-1.61629	5.37939	6.58349	4.83611	-0.884943	1.47925	0.195567	-1.50963	2.06614	4.63058
hsa-miR-130b-3p	-1.02767	0.286172	-3.49815	0.000561972	0.00107172	-1.75889	DOWN	-1.64092	3.1957	-1.63331	-1.6019	-0.753	-1.33043	-0.381243	0.983343	-0.361248	2.69107	-1.08331	3.56816	3.61566	3.50839	4.85607	4.42444	5.54611	4.22873	-1.63592	-1.45183	4.78681	3.65176	2.51893	2.35081	0.041887	0.2734	0.615457	-1.57398	0.332413	-1.64422	3.96448	-1.45027	-1.61629	5.9265	7.36533	-1.66395	-0.884943	1.16773	1.517	-1.50963	1.78267	4.93596
hsa-miR-132-5p	-1.42517	-0.542463	-6.63188	2.32681e-10	9.32543e-10	12.4393	DOWN	-1.64092	2.02864	-1.63331	-1.6019	-0.753	3.55759	1.40669	2.47993	-0.361248	-1.49655	2.82617	-1.53249	1.14459	-1.37441	-0.79222	-1.15718	-1.12207	-1.67499	1.94678	-1.45183	-0.454004	-0.589017	-1.29147	-1.57603	1.86447	-1.62534	-0.345561	-1.57398	-1.63472	0.66013	-1.4824	-1.45027	2.17882	-1.41896	-0.7093	-1.66395	-0.884943	-0.184354	-1.66329	-1.50963	-1.60817	5.3378
hsa-miR-133a-5p	-1.17436	-0.00923113	-4.25417	3.05089e-05	6.85249e-05	0.997375	DOWN	1.52047	2.98174	2.59759	7.95389	-0.753	-1.33043	0.309707	-1.62016	-0.361248	3.56173	-1.08331	4.57768	3.75214	-1.37441	-0.79222	3.46708	3.02962	-1.67499	0.923298	-1.45183	3.96013	1.15763	-1.29147	-1.57603	2.10772	-0.161563	4.53943	-1.57398	-1.63472	-1.64422	-1.4824	-1.45027	2.94675	6.14787	-0.7093	-1.10382	-0.884943	-1.66156	-1.66329	-1.50963	3.57552	-1.14451
hsa-miR-133b	1.84526	3.11766	7.75795	2.76704e-13	1.45738e-12	19.0645	UP	-1.64092	2.97147	4.18132	2.06839	5.14478	3.13289	3.36727	-1.62016	-0.361248	4.68938	-1.08331	1.94437	1.9939	4.38248	-0.79222	5.39542	4.0343	-1.14451	4.86969	2.07064	3.07272	2.24219	4.5186	-1.57603	4.42771	1.63882	4.04506	0.66013	0.226878	3.86757	1.31948	-1.45027	-1.61629	5.46811	5.80852	3.04843	4.08063	4.82126	0.314346	4.33486	2.36632	4.9728
hsa-miR-134-3p	2.91455	2.48677	11.1987	1.56431e-23	1.72208e-22	42.4427	UP	2.52596	-1.56057	3.82987	-1.6019	4.52056	-1.33043	2.69633	-1.62016	-0.361248	2.37976	-1.08331	4.0689	-1.59132	3.02598	3.93933	-1.15718	-1.12207	-0.53753	0.203074	-1.45183	-1.63778	0.0392891	4.65073	3.39241	0.6671	-1.62534	3.42183	-1.57398	2.56199	0.169196	4.04706	3.79006	3.96013	3.84871	-0.7093	-0.0450891	-0.884943	1.72357	-0.679843	-1.50963	2.97524	-1.14451
hsa-miR-1343-3p	-2.95264	7.83045	-50.6107	6.42419e-127	1.6478e-123	278.79	DOWN	8.51401	9.30392	9.84625	9.11859	9.35229	8.79195	8.86813	8.95476	9.56733	9.32848	9.56733	9.88292	9.56733	9.35229	9.11859	9.84625	10.3025	9.77904	9.9254	9.4016	8.93129	8.95476	9.16403	9.25687	8.8467	9.35229	9.16403	9.37804	9.21144	9.4523	8.82378	9.88292	9.53519	9.32848	8.8467	10.0023	9.6861	8.7593	8.39614	9.50618	8.93129	9.02374
hsa-miR-135a-3p	1.78433	6.2819	11.8346	1.44565e-25	1.84482e-24	47.0988	UP	3.60072	3.74377	1.39618	6.32009	4.74262	6.70052	5.16324	5.89215	4.34713	5.68502	4.86777	4.99997	6.03977	6.97687	6.26125	5.24986	4.25805	4.72599	5.48305	6.02673	5.62477	6.00897	5.96559	5.55209	6.38641	5.42027	5.86461	5.40013	4.09973	5.74847	5.58256	5.35209	5.55209	4.05801	4.42444	5.13694	5.13891	5.88274	5.80852	4.5869	4.09591	6.72043
hsa-miR-135b-3p	-1.599	-0.412731	-6.67268	1.84387e-10	7.49528e-10	12.6675	DOWN	-1.64092	1.58722	-1.63331	-1.6019	-0.753	3.83572	3.0919	2.34264	-0.361248	1.55372	-1.08331	-1.53249	-1.59132	-1.37441	-0.79222	3.04843	-1.12207	-1.67499	0.264561	-1.45183	-0.21117	-0.742883	-1.29147	-1.57603	-1.66137	-1.62534	-1.65392	-1.57398	0.533398	-1.64422	-1.4824	-1.45027	2.30895	-1.41896	-0.7093	2.21867	-0.884943	-1.66156	1.61168	-1.50963	2.65845	5.41586
hsa-miR-138-1-3p	1.34997	2.03019	4.83358	2.44751e-06	6.24663e-06	3.41873	UP	4.38408	-1.56057	2.32311	-1.6019	-0.753	4.50768	3.41062	-1.62016	-0.361248	2.49493	-1.08331	-1.53249	-1.59132	1.90973	-0.79222	-1.15718	4.3701	3.3901	1.74602	-1.45183	1.63377	3.6089	2.91739	2.37743	-0.388713	2.52847	2.14523	-1.57398	4.98635	-1.64422	2.714	4.31472	-1.61629	-1.41896	-0.7093	-1.66395	3.4806	2.96235	3.30914	-1.50963	3.64483	2.76633
hsa-miR-138-5p	2.05924	1.22548	7.98091	6.79084e-14	3.77024e-13	20.4505	UP	4.05463	-1.56057	-1.63331	2.15508	-0.753	-1.33043	-1.63632	3.58824	-0.361248	3.25453	4.18132	3.11312	3.10723	-1.37441	-0.79222	4.8716	3.34353	1.85002	-1.63592	-1.45183	1.28214	-1.67642	3.16151	-1.57603	1.69934	-1.62534	-1.65392	1.08436	-1.63472	-1.64422	-1.4824	-1.45027	-1.61629	-1.41896	4.51289	-0.890978	4.80954	-1.66156	-1.66329	-1.50963	4.4578	-1.14451
hsa-miR-139-3p	1.78738	4.12855	7.7767	2.46082e-13	1.30144e-12	19.1802	UP	1.00076	3.94665	4.7678	-1.6019	5.19381	-1.33043	4.76406	3.37149	-0.361248	-1.49655	-1.08331	-1.53249	4.68003	4.51115	4.1848	-1.15718	6.91907	5.35209	4.80581	4.0689	5.04686	4.66726	5.30265	4.75268	2.77406	4.77896	5.53037	4.98038	5.38365	4.71821	5.01773	4.78681	5.07238	-1.41896	-0.7093	4.52056	3.62031	4.61023	4.23067	4.9728	3.51056	-1.14451
hsa-miR-140-3p	-2.35279	0.831472	-8.0203	5.28638e-14	2.9606e-13	20.6977	DOWN	-0.666774	-1.56057	5.19835	3.22967	4.79251	-1.33043	3.75415	1.2698	-0.361248	3.4933	-1.08331	2.54188	4.50768	-1.37441	-0.79222	4.23067	4.25805	-1.2736	4.49254	4.62652	5.45856	-1.36906	3.63465	2.06614	3.22325	3.11518	4.3112	3.01747	-1.63472	-1.64422	-1.4824	1.89446	3.77428	-1.41896	-0.7093	2.64585	4.56371	2.76448	0.00791739	-1.50963	3.67564	-1.14451
hsa-miR-142-3p	-1.6215	0.473206	-5.45075	1.28551e-07	3.81195e-07	6.27149	DOWN	-1.64092	-1.56057	1.35636	5.34761	-0.753	-1.33043	0.682498	3.48282	-0.361248	1.91243	-1.08331	-1.53249	-1.59132	-1.37441	-0.79222	-1.15718	-1.12207	4.08783	3.84871	-1.45183	-1.63778	-0.0631	2.90838	2.40806	-1.66137	2.78484	-1.65392	5.37229	-1.63472	2.18604	-1.4824	-1.45027	2.48753	-1.41896	-0.7093	3.10502	-0.884943	-1.66156	-1.66329	1.10068	-1.60817	5.49702
hsa-miR-143-3p	-2.4089	0.959084	-8.1317	2.59438e-14	1.49541e-13	21.4005	DOWN	-1.64092	-1.56057	-1.63331	5.13891	4.30392	3.92628	2.17882	2.42541	-0.361248	-1.49655	-1.08331	2.13949	5.24986	3.89261	-0.79222	4.87536	4.50768	3.48705	-1.63592	4.15899	-1.63778	2.76448	3.68392	3.14636	-1.66137	1.517	1.64125	3.78836	-1.63472	3.12659	-1.4824	-1.45027	-1.61629	-1.41896	-0.7093	4.96502	4.12405	2.09581	-0.687724	-1.50963	0.63003	4.28898
hsa-miR-144-3p	-1.44222	0.129611	-4.98126	1.23825e-06	3.25088e-06	4.07642	DOWN	-1.64092	-1.56057	2.36632	2.30895	-0.753	-1.33043	-0.462139	6.13301	-0.361248	3.91525	4.18994	-1.53249	3.99804	-1.37441	-1.76377	-1.15718	-1.12207	1.75743	-1.63592	2.52346	-1.63778	-0.407778	-1.29147	0.458239	-1.66137	-1.62534	-0.2045	2.18109	-1.63472	0.392174	-1.4824	-1.45027	-1.61629	-1.41896	-0.7093	2.28623	-0.884943	0.165139	1.54065	4.65073	5.45606	-1.14451
hsa-miR-145-5p	-1.45148	1.95666	-4.7725	3.22982e-06	8.15402e-06	3.15142	DOWN	-0.381243	3.26592	2.7052	6.30348	-0.753	3.95251	4.09782	4.55293	-0.361248	4.5299	4.20255	-1.53249	3.45387	3.51274	4.19177	-1.15718	-1.12207	3.13987	4.37925	2.00323	4.28183	4.37763	3.87447	3.07847	1.76657	0.821593	4.48744	-1.57398	-1.63472	1.8407	-1.4824	-1.45027	2.78281	-1.41896	-0.7093	1.88247	-0.884943	-0.0140261	1.18783	2.46679	5.73362	-1.14451
hsa-miR-1468-3p	-1.54371	-0.397287	-6.50917	4.65818e-10	1.79403e-09	11.7587	DOWN	0.615457	-1.56057	1.93943	-1.6019	-0.753	-1.33043	-1.63632	-0.248661	-0.361248	2.66273	-1.08331	-1.53249	3.3135	-1.37441	4.09973	-1.15718	2.80826	-1.67499	-1.63592	-1.45183	2.46441	-1.67642	-1.29147	-1.57603	1.87797	-1.62534	2.6536	1.36244	3.73358	-1.64422	2.75824	5.11713	-1.61629	-1.41896	-0.7093	0.402804	5.08603	-1.66156	-1.66329	2.74067	0.23627	-1.14451
hsa-miR-1468-5p	1.26004	0.397772	5.05353	8.82278e-07	2.35979e-06	4.40408	UP	2.95071	-1.56057	-0.269157	-1.6019	-0.753	-1.33043	-1.63632	-1.62016	-0.361248	1.75225	-1.08331	2.60332	3.99436	-1.37441	-0.79222	-1.15718	-1.12207	-1.67499	-1.63592	-1.45183	-1.63778	-1.2736	-1.29147	0.912717	0.3215	-1.62534	2.23731	1.24412	2.21867	-1.64422	-1.4824	-1.45027	-1.61629	-1.41896	-0.7093	-1.66395	-0.884943	-1.66156	-0.67113	4.42953	2.96235	-1.14451
hsa-miR-147a	-1.18818	1.40613	-3.7541	0.000220215	0.000447939	-0.878786	DOWN	-1.64092	3.11952	-1.63331	3.38779	4.16242	5.14087	1.2698	4.14363	-0.361248	1.96437	-1.08331	1.92998	-1.59132	2.00561	-0.79222	3.50427	4.54315	2.04744	-0.361248	-1.45183	1.68748	3.48503	3.88746	-1.57603	-1.66137	2.14523	1.36851	-1.57398	-1.63472	4.06529	-1.4824	-1.45027	4.16242	-1.41896	-0.7093	2.85313	4.02863	3.29254	-1.66329	4.17568	-1.60817	6.35197
hsa-miR-148a-5p	-1.08411	-0.510296	-4.65582	5.44617e-06	1.33935e-05	2.64854	DOWN	-1.64092	-1.56057	-1.63331	-1.6019	-0.753	-1.33043	-1.63632	-1.62016	-0.361248	4.76047	-1.08331	4.88323	3.20917	-1.37441	-0.79222	-1.15718	-1.12207	-1.03863	4.49817	-1.45183	-1.63778	0.0910522	-1.29147	-1.57603	-1.66137	1.85752	-1.65392	-1.57398	-1.63472	2.47774	-1.4824	-1.45027	-1.61629	-1.41896	-0.7093	0.355809	-0.884943	-1.66156	1.66883	-1.50963	-1.60817	4.91886
hsa-miR-148b-5p	-1.39244	-0.350724	-5.41842	1.50959e-07	4.42527e-07	6.11538	DOWN	-1.64092	-1.56057	2.86657	2.09077	-0.753	4.62289	1.5818	-1.62016	-0.361248	-1.49655	3.51672	1.63113	0.495617	-1.37441	-0.79222	-1.15718	5.71065	-1.67499	2.21374	-1.45183	4.68938	-0.0950304	-1.29147	-1.57603	-0.283539	1.36547	-1.65392	-1.57398	2.5088	-1.64422	-1.4824	-1.45027	-1.61629	-1.41896	-0.7093	-0.186735	-0.884943	-0.292543	-0.768404	-1.50963	5.21062	-1.14451
hsa-miR-151a-5p	-3.19362	0.561759	-11.5488	1.19648e-24	1.42742e-23	44.9976	DOWN	-1.64092	5.37939	3.60464	-1.6019	-0.753	5.40013	4.58149	4.59074	-0.361248	-1.49655	-1.08331	3.75001	4.91455	-1.37441	-0.79222	-1.15718	-1.12207	4.49817	4.99216	5.4634	5.5109	5.54351	2.79216	3.74788	1.9939	1.15053	2.55161	2.62847	3.99804	1.36547	-1.4824	2.84856	1.61827	-1.41896	-0.7093	3.07033	4.07474	-1.66156	-0.813957	3.56173	3.13289	5.99264
hsa-miR-151b	-2.80781	1.04633	-8.95266	1.1758e-16	8.40089e-16	26.7363	DOWN	-1.64092	3.95435	4.38248	-1.6019	4.75642	-1.33043	5.02547	3.34105	5.393	3.75616	4.39714	3.9321	2.73438	-1.37441	4.71292	5.90175	6.84282	2.97749	2.03283	5.77878	5.53518	4.68003	3.92272	3.43656	2.81257	4.54708	2.42312	0.9441	-0.29677	-1.64422	-1.4824	3.4623	6.61624	-1.41896	-0.7093	2.82397	-0.884943	-1.66156	-1.66329	-1.50963	5.24779	-1.14451
hsa-miR-152-3p	-1.55878	0.189784	-5.93904	1.0465e-08	3.55061e-08	8.71448	DOWN	1.72863	4.80581	-1.63331	3.82808	-0.753	-1.33043	2.65603	3.62031	-0.361248	-1.49655	3.87447	1.83204	0.635552	-1.37441	-0.79222	-1.15718	-1.12207	-0.764935	1.8247	1.79793	1.60497	-0.726943	-1.29147	0.570754	1.81656	2.29345	3.78628	1.91243	-1.63472	2.87528	-1.4824	3.07847	-1.61629	4.5	5.66581	-1.66395	4.61198	1.64663	-1.66329	-1.50963	-1.60817	4.67828
hsa-miR-152-5p	1.09786	0.411716	4.32202	2.29947e-05	5.25212e-05	1.26747	UP	5.04128	-1.56057	2.32777	0.23627	-0.753	-1.33043	0.38017	-1.62016	-0.361248	-1.49655	-1.08331	3.72995	-1.59132	-1.37441	-0.79222	-1.15718	-1.12207	-1.67499	-0.0322261	2.46441	0.591513	-1.67642	-1.29147	-1.57603	1.64394	2.98375	-1.65392	0.790176	2.60586	-1.64422	-1.4824	-1.45027	-1.61629	4.24049	3.77244	-1.08977	-0.884943	-0.361248	-1.66329	5.33133	-1.60817	3.3373
hsa-miR-153-3p	-1.22662	0.131542	-4.56887	7.98766e-06	1.91659e-05	2.28053	DOWN	-1.64092	3.75214	1.88022	1.574	4.60288	2.74781	-1.63632	0.439196	-0.361248	-1.49655	-1.08331	-1.53249	2.9451	3.20369	-0.79222	-1.15718	-1.12207	2.39393	3.53658	-1.45183	1.93491	-1.62186	-1.29147	2.8798	-0.0105043	-1.62534	0.591513	0.640874	5.48567	-1.64422	-1.4824	-1.45027	-1.61629	-1.41896	-0.7093	-1.66395	3.39558	-1.66156	-0.19415	-1.50963	3.24299	4.26405
hsa-miR-1537-3p	-1.52827	0.303779	-5.17977	4.83868e-07	1.32598e-06	4.9855	DOWN	-1.64092	0.771743	-1.63331	4.35079	-0.753	2.42082	1.924	4.0689	4.73369	3.62258	-1.08331	-1.53249	1.87381	-1.37441	-0.79222	-1.15718	-1.12207	-0.658565	-1.63592	2.14523	-1.63778	-1.67642	-1.29147	-1.57603	0.0565565	-1.62534	3.49118	-1.57398	-1.63472	-1.64422	-1.4824	-1.45027	2.89395	-1.41896	-0.7093	-1.00659	-0.884943	-1.66156	-1.66329	5.23887	-1.60817	5.52794
hsa-miR-1537-5p	-1.35008	-0.75351	-6.64475	2.16228e-10	8.69317e-10	12.5112	DOWN	-1.64092	-1.56057	-1.63331	-1.6019	-0.753	5.0076	2.39171	3.00098	-0.361248	-1.49655	3.07847	-1.53249	1.21525	-1.37441	-0.79222	-1.15718	-1.12207	2.75616	-0.5573	-1.45183	-1.63778	2.72349	-1.29147	1.8549	1.47333	1.55111	-1.65392	-1.57398	3.13289	-0.656109	-1.4824	-1.45027	1.14168	-1.41896	-0.7093	-1.66395	3.92272	-1.66156	-1.66329	3.93754	-1.60817	4.1397
hsa-miR-154-3p	-1.09323	-0.258692	-4.42616	1.48e-05	3.45737e-05	1.68909	DOWN	1.80332	3.80973	5.92365	-1.6019	-0.753	-1.33043	2.80384	-1.62016	-0.361248	-1.49655	-1.08331	-1.53249	1.85246	-1.37441	-0.79222	-1.15718	-1.12207	1.35636	1.10068	-1.45183	-1.63778	-1.67642	-1.29147	-1.57603	-1.66137	-1.62534	-0.804109	2.39614	-1.63472	-1.64422	-1.4824	-1.45027	4.52803	3.63465	-0.7093	4.86777	-0.884943	-1.66156	1.6787	-1.50963	3.2471	3.18369
hsa-miR-1587	2.8159	4.28062	12.0632	2.6435e-26	3.58761e-25	48.7885	UP	3.35015	0.957539	1.96956	3.37748	-0.753	3.37506	4.49817	2.4112	-0.361248	3.25058	-1.08331	1.8549	4.84843	4.22473	-0.79222	-1.15718	-1.12207	3.79006	5.23644	2.02384	4.26017	3.93754	4.05801	0.615457	4.24049	4.7408	5.1152	5.51322	4.22114	4.73713	4.5186	2.73246	4.10662	3.92272	-0.7093	2.75824	5.06672	4.64509	4.1397	2.99194	4.07277	-1.14451
hsa-miR-15a-5p	-1.62369	0.639911	-5.2995	2.71009e-07	7.66415e-07	5.5474	DOWN	-1.64092	-1.56057	4.49633	4.094	-0.753	4.94738	4.45584	2.55669	4.31856	-1.49655	-1.08331	-1.53249	3.84496	3.6297	-0.79222	-1.15718	6.12949	0.548735	3.96448	3.89261	4.98447	4.45211	-1.29147	4.23676	3.97947	-1.62534	0.465687	3.346	3.55274	-1.64422	4.34557	-1.45027	-1.61629	6.44735	4.48579	-0.605322	4.63795	-1.66156	-1.66329	-1.50963	-1.60817	2.91739
hsa-miR-15b-5p	-2.21432	2.55722	-7.50072	1.36092e-12	6.7182e-12	17.4943	DOWN	-1.64092	5.67957	1.79003	6.72043	-0.753	4.5186	5.12913	5.24572	-0.361248	3.67999	3.39241	1.0872	4.7408	5.17543	4.02437	4.51115	3.34353	3.4032	4.47494	5.45856	5.20867	4.21556	3.53887	-1.57603	2.70088	5.10149	5.0076	6.4877	-1.63472	3.1445	-1.4824	2.71882	4.87536	1.69717	-0.7093	-1.66395	4.72972	2.00799	1.80887	4.8286	3.07033	5.46811
hsa-miR-16-5p	-1.63248	1.43744	-5.01332	1.06582e-06	2.8213e-06	4.22134	DOWN	1.93491	4.86777	3.2772	4.30568	4.59673	4.94738	4.67093	2.37743	-0.361248	2.39171	-1.08331	3.04843	4.13191	5.37447	-0.79222	-1.15718	6.28646	5.0314	4.25173	3.87447	5.29344	4.7678	3.55274	1.90073	-1.66137	2.12962	3.24504	-1.57398	-1.63472	3.23967	-1.4824	-1.45027	-1.61629	6.26966	-0.7093	-0.651309	-0.884943	3.2734	-1.66329	1.88247	-1.60817	3.88579
hsa-miR-17-3p	-3.20909	4.2782	-16.054	1.8986e-39	4.8217e-38	78.9257	DOWN	2.63375	6.80126	6.16198	7.82565	5.56246	6.10722	5.61951	5.25809	5.90175	6.1037	6.5971	7.12574	6.72043	5.0314	6.43899	6.75993	7.59813	6.3698	6.36099	6.85468	5.17332	5.88878	5.99264	6.14787	5.86461	5.61119	5.9384	6.44735	6.45623	6.26125	6.22958	5.62992	6.0121	5.60834	6.40032	5.35209	6.11798	5.60834	5.58256	5.65485	5.17332	6.22219
hsa-miR-17-5p	-1.59255	1.10153	-5.23835	3.6483e-07	1.02049e-06	5.25913	DOWN	-1.64092	-1.56057	-1.63331	5.24572	-0.753	4.23262	0.799961	0.793539	-0.361248	-1.49655	4.00182	5.01578	0.703248	4.35079	5.55739	4.56	4.70383	2.74067	4.11309	-1.45183	3.84496	4.17201	-1.29147	3.13289	-1.66137	1.89865	-1.65392	2.95302	-0.0272174	4.61624	-1.4824	-1.45027	-1.61629	5.04686	5.95214	1.35636	3.13509	1.22297	2.9382	-1.50963	3.07679	5.78394
hsa-miR-181a-5p	-1.75998	1.87879	-6.04764	5.8713e-09	2.05455e-08	9.27886	DOWN	-0.351691	3.8263	3.50839	2.9484	-0.753	4.43136	4.61809	4.08252	-0.361248	1.03858	3.65549	1.8247	1.81941	4.40437	-0.79222	5.32017	4.2137	-0.00698261	4.00557	3.5486	4.86379	4.1274	4.06529	3.43085	1.31294	2.51893	4.18646	3.40838	3.15953	-0.146817	-1.4824	3.32441	-1.61629	-1.41896	5.4927	4.82505	3.91125	2.20483	3.2753	3.582	2.79935	6.82289
hsa-miR-181b-2-3p	-1.20207	0.0785091	-4.22231	3.47991e-05	7.72811e-05	0.871823	DOWN	-1.64092	-1.56057	2.10062	4.90417	-0.753	-1.33043	1.75743	-0.0587957	4.98038	-1.49655	-1.08331	4.1274	3.64725	-1.37441	-0.79222	2.69107	4.76047	-1.67499	-1.63592	-1.45183	-1.63778	-0.146817	-1.29147	-1.57603	-0.995235	-1.62534	-1.65392	-1.57398	-1.63472	4.09591	4.29223	-1.45027	4.38813	-1.41896	-0.7093	0.976035	-0.884943	-1.66156	0.460726	-1.50963	2.82617	-1.14451
hsa-miR-1825	2.18648	3.63404	9.07697	5.08279e-17	3.72496e-16	27.5666	UP	5.10337	-1.56057	4.34023	2.21867	3.41764	-1.33043	4.24235	3.25896	4.94738	4.96699	-1.08331	2.79452	-1.59132	2.90422	-0.79222	5.10893	-1.12207	3.0857	0.779735	2.89189	3.1706	4.94937	3.80973	3.63148	4.91455	4.59673	4.77136	3.03438	4.87536	3.4989	4.2137	4.50768	5.18562	-1.41896	-0.7093	3.79176	-0.884943	3.55759	3.4623	-1.50963	4.30745	-1.14451
hsa-miR-183-3p	2.66965	1.07524	8.89937	1.68168e-16	1.17856e-15	26.3821	UP	-1.64092	-1.56057	1.96437	11.1179	-0.753	-1.33043	-1.63632	-1.62016	-0.361248	-1.49655	-1.08331	4.98038	-1.59132	8.78166	-0.79222	5.02336	3.61566	-0.553113	-1.63592	-1.45183	-0.462139	-1.60797	-1.29147	-1.57603	-1.66137	-1.62534	-1.65392	-1.57398	2.42541	-1.64422	-1.4824	2.12477	-1.61629	-1.41896	-0.7093	3.85807	3.83347	3.07033	-1.66329	-1.50963	3.36525	-1.14451
hsa-miR-184	-1.25554	2.42971	-4.43265	1.43953e-05	3.37204e-05	1.71564	DOWN	-1.64092	2.13949	-1.63331	3.987	4.89123	-1.33043	5.18357	3.22325	4.3112	3.69958	4.89123	4.78681	4.17023	1.89658	-0.79222	-1.15718	-1.12207	3.89441	-1.63592	-1.45183	2.62847	2.5212	4.46508	4.1848	1.91512	3.87447	3.86757	5.18357	3.987	4.41309	3.90534	5.21062	3.57552	2.01998	-0.7093	2.83197	-0.884943	3.26592	4.72214	5.05512	1.61827	-1.14451
hsa-miR-186-5p	-1.01001	0.396812	-3.36004	0.000911805	0.00168865	-2.21057	DOWN	-1.64092	3.45834	1.8407	5.46098	5.53518	-1.33043	0.11543	-1.62016	-0.361248	-1.49655	4.05801	-1.53249	-1.59132	-1.37441	-0.79222	-1.15718	-1.12207	-1.67499	-1.63592	-1.45183	-1.63778	1.71219	-1.29147	2.09829	-0.0677913	3.36525	-1.65392	-1.57398	-1.63472	-0.0478652	-1.4824	-1.45027	-1.61629	3.80361	3.82233	0.805439	4.36057	-0.0530304	-1.66329	-1.50963	-1.60817	4.34023
hsa-miR-187-3p	2.26549	1.4591	8.35396	6.17544e-15	3.78947e-14	22.8184	UP	0.271187	-1.56057	-1.63331	-1.6019	-0.753	3.4933	-1.63632	1.18146	-0.361248	3.72335	-1.08331	4.49633	4.40978	4.07867	-0.79222	-1.15718	-1.12207	-1.67499	-1.63592	1.52724	2.4112	3.6089	3.02962	-1.57603	-0.645922	-1.62534	1.46713	1.77187	-0.0950304	-1.64422	-1.4824	4.14363	-1.61629	1.59224	3.7959	1.15053	-0.884943	-1.66156	2.51621	-1.50963	-1.60817	-1.14451
hsa-miR-188-5p	1.00794	2.93907	3.92779	0.000113271	0.000239325	-0.250328	UP	-1.64092	2.80384	1.86014	0.99473	5.04312	3.99804	3.16847	0.187835	-0.361248	3.23967	3.21939	2.62325	-1.59132	2.35081	-0.79222	-1.15718	-1.12207	5.01212	4.32914	3.28491	1.67337	4.73541	4.35079	-1.57603	2.31347	0.183704	4.96287	-1.57398	3.47604	4.54526	3.64725	4.83233	3.64725	5.06079	-0.7093	4.5565	4.0689	-0.738961	-0.27427	3.36083	4.68938	2.82397
hsa-miR-18a-5p	-1.3607	0.443722	-4.40343	1.63055e-05	3.79524e-05	1.59632	DOWN	2.20206	2.37976	3.35643	5.50161	-0.753	-1.33043	0.4497	0.0281543	4.56	-1.49655	-1.08331	-1.53249	1.28214	5.01578	5.19381	4.14713	5.51816	-1.67499	3.81167	-1.45183	0.960213	0.307704	-1.29147	2.84071	0.951752	2.23493	3.77612	-1.57398	3.13987	-0.694065	-1.4824	-1.45027	-1.61629	4.90608	7.78486	4.10432	-0.884943	-0.22203	-1.66329	3.47604	-1.60817	-1.14451
hsa-miR-191-5p	-5.26835	4.03985	-20.9347	2.9736e-55	2.3113e-53	115.2	DOWN	3.86587	5.24986	6.35197	6.43899	7.08956	5.81821	6.91907	6.45623	6.54858	6.51006	6.41283	5.69069	7.71619	6.86541	6.23772	7.39062	7.28422	7.36533	7.44033	8.02865	8.24849	7.37779	6.68167	7.21241	7.21241	7.24278	7.66746	6.78104	7.06565	6.09699	5.27977	6.22958	7.4793	7.30297	5.59787	7.22434	6.24579	6.01915	6.54426	6.52722	7.55832	6.26125
hsa-miR-1911-5p	-1.24208	0.620007	-4.32254	2.29447e-05	5.24538e-05	1.26955	DOWN	-1.64092	-1.56057	1.42511	-1.6019	-0.753	2.66741	0.962887	-1.62016	-0.361248	-1.49655	-1.08331	0.849646	-1.59132	4.96502	4.17379	-1.15718	3.3373	0.808789	3.98129	-1.45183	0.805439	-0.503957	-1.29147	-1.57603	-1.66137	2.85313	3.97947	2.07064	3.19108	-1.64422	4.0615	-1.45027	0.626552	5.78948	3.66736	-1.66395	3.4989	1.54313	4.40594	4.6985	-1.60817	3.77244
hsa-miR-192-5p	1.10545	2.39254	3.99504	8.70182e-05	0.000186157	-0.000304464	UP	5.5649	-1.56057	2.93589	-1.6019	-0.753	-1.33043	3.17952	4.44634	-0.361248	4.17023	2.78981	4.11671	0.576074	-1.37441	3.73966	5.73111	-1.12207	1.00713	0.695926	2.53088	-1.63778	4.34023	4.75642	2.75407	3.56173	1.49141	3.62031	2.15508	-1.63472	3.15953	2.97147	-1.45027	10.1812	5.2542	5.34761	3.11952	3.23165	1.41243	4.5299	2.68237	3.5486	4.90824
hsa-miR-193a-3p	-1.39945	0.874797	-4.67367	5.03097e-06	1.2432e-05	2.72481	DOWN	-1.64092	5.11918	-1.63331	1.62158	8.88919	4.49444	0.860504	1.97928	-0.361248	4.0921	-1.08331	1.27896	4.80954	-1.37441	3.55759	5.40689	-1.12207	2.49747	1.96956	-1.45183	3.51056	3.59859	-1.29147	3.62258	0.912717	-1.62534	3.06573	4.30392	0.679657	1.9492	-1.4824	2.03073	-1.61629	-1.41896	6.61624	0.426196	-0.884943	0.372383	-1.66329	-1.50963	0.144357	3.95435
hsa-miR-193a-5p	-1.1341	3.78762	-5.44726	1.30801e-07	3.87418e-07	6.25463	DOWN	4.93422	4.04137	3.97947	3.89976	4.52056	3.77244	4.94153	5.2149	4.9728	3.51274	3.95435	4.1397	4.47817	5.15699	4.24811	-1.15718	-1.12207	4.64705	5.02152	4.65639	4.70739	4.95513	5.23223	3.8601	5.03343	3.97373	5.26233	5.01212	3.2734	5.14087	4.91886	-1.45027	4.26017	5.23644	5.46811	4.26767	5.48829	5.05699	5.05061	5.19381	4.83999	5.10337
hsa-miR-194-3p	1.82644	2.34653	6.81893	7.94954e-11	3.34272e-10	13.4933	UP	4.96895	-1.56057	4.00557	-1.6019	3.6916	-1.33043	2.84661	2.11328	-0.361248	2.91553	3.85207	-1.53249	2.15508	2.92981	3.80779	3.7959	-1.12207	3.63781	0.241948	-1.45183	-0.186735	3.31545	2.90233	4.40978	-0.830043	1.0099	2.40806	1.02202	0.609483	4.03246	3.4623	3.05715	0.169196	5.01212	4.18812	0.47727	4.08442	2.68455	-1.66329	4.41854	4.42953	2.84071
hsa-miR-197-3p	1.46046	4.4024	8.17819	1.92477e-14	1.11951e-13	21.6953	UP	4.26405	3.79798	3.48906	1.30059	3.7282	4.14538	3.74377	4.52252	4.81341	4.80192	-1.08331	2.33021	4.07867	-1.37441	4.48196	5.05512	-1.12207	3.44334	2.76633	3.77612	4.77896	4.99592	4.43136	3.93389	4.46508	4.02242	5.08603	4.82315	5.02948	4.95312	4.67093	4.87741	3.63148	5.02547	6.67121	4.88135	-0.884943	4.17945	5.15699	3.36083	5.03745	3.4806
hsa-miR-1972	1.79073	2.76107	6.40233	8.46665e-10	3.18898e-09	11.1732	UP	2.00799	-1.56057	-1.63331	3.69958	-0.753	-1.33043	1.8407	2.87086	-0.361248	4.04706	4.82315	-1.53249	4.39714	2.69107	-0.79222	-1.15718	-1.12207	4.65245	-1.63592	2.18873	3.4713	3.01972	-1.29147	4.70383	0.860504	3.77986	4.65073	4.1149	4.48579	-1.64422	2.90422	5.07453	-1.61629	-1.41896	3.85604	2.27166	-0.884943	-1.66156	-1.66329	-1.50963	4.66726	-1.14451
hsa-miR-1973	-1.19665	1.03793	-3.64275	0.00033312	0.000658283	-1.26847	DOWN	0.153826	-1.56057	5.5109	3.78421	6.26125	3.47604	4.11309	3.17952	-0.361248	4.0689	-1.08331	1.5485	-1.59132	2.81257	-0.79222	-1.15718	-1.12207	-1.67499	4.32584	4.21742	6.28646	5.7697	4.5489	4.54708	3.37748	4.47817	3.92272	-1.57398	4.68378	1.7261	-1.4824	-1.45027	5.2662	3.79176	4.80954	4.47817	5.4927	2.11328	4.21742	1.43831	-1.60817	5.26233
hsa-miR-1976	1.14719	5.06571	7.34695	3.47529e-12	1.63562e-11	16.571	UP	5.6742	1.3739	4.7908	2.81257	5.5409	5.24986	5.07453	4.88679	5.55209	5.8517	4.38813	5.14877	5.14087	4.88323	4.29398	-1.15718	-1.12207	5.34517	4.81341	5.04128	5.4634	5.55739	5.45856	5.169	5.47857	5.05512	4.55472	4.89502	5.71355	5.19184	6.06973	5.20672	5.42924	4.00557	-0.7093	5.27092	5.48305	5.42027	5.37447	4.29061	5.50161	4.58497
hsa-miR-199b-5p	1.6093	1.99468	5.61404	5.65047e-08	1.72747e-07	7.07084	UP	2.58	2.52346	3.57981	-1.6019	-0.753	-1.33043	-1.63632	0.21962	4.60103	3.66736	-1.08331	-1.53249	1.31294	-1.37441	4.70383	4.01862	6.40475	-1.67499	-1.63592	3.19786	3.80007	1.09418	-1.29147	3.75214	-1.08743	3.06354	-1.65392	-1.57398	3.82987	1.86014	-1.4824	-1.45027	-1.61629	4.19923	6.19228	-1.18356	5.38841	4.69666	3.95618	4.19573	3.60072	4.94937
hsa-miR-19a-5p	-1.03892	0.196235	-3.60603	0.00038103	0.000744359	-1.39471	DOWN	-0.618809	1.75484	-0.0025	4.01677	6.33574	-1.33043	0.486559	-1.62016	-0.361248	-1.49655	2.91367	-1.53249	-1.59132	2.82617	-0.79222	3.00098	-1.12207	1.96437	0.711143	-1.45183	-1.63778	1.02527	-1.29147	1.00076	-0.784609	3.86757	0.815107	-1.57398	-1.63472	1.16171	-1.4824	-1.45027	-1.61629	3.16151	4.60848	-1.66395	-0.884943	3.16151	-1.66329	-1.50963	-1.60817	-1.14451
hsa-miR-19b-3p	-2.1057	1.48401	-6.54168	3.87885e-10	1.52362e-09	11.9381	DOWN	2.31347	4.66352	-1.63331	4.56186	5.29344	2.75824	2.03283	2.45378	-0.361248	1.86447	2.81947	4.56533	5.41807	4.85963	4.38408	5.48305	6.03977	3.187	1.47023	2.77184	3.7282	3.11312	-1.29147	1.49436	3.13289	3.4623	4.29061	7.39062	-1.63472	2.99194	-1.4824	-1.45027	-1.61629	4.89502	6.81292	1.67337	3.96828	-1.66156	0.360883	5.25809	2.6536	3.2772
hsa-miR-200a-3p	-1.29715	0.647346	-4.39772	1.67061e-05	3.88497e-05	1.57308	DOWN	-1.64092	3.90356	-1.63331	6.67121	-0.753	2.29957	1.87797	3.63148	-0.361248	-1.49655	-1.08331	3.90711	-1.59132	2.13949	-0.79222	-1.15718	4.19748	4.00761	-1.63592	-1.45183	-1.63778	3.26271	2.86215	-1.57603	-0.20223	3.07033	2.3185	1.25657	-1.63472	-0.503957	-1.4824	-1.45027	-1.61629	-1.41896	5.12913	0.0593174	4.138	2.74305	2.3751	-1.50963	-1.60817	2.99727
hsa-miR-202-3p	-1.7694	1.26458	-5.90249	1.26917e-08	4.25546e-08	8.52621	DOWN	0.149252	4.61624	-1.63331	8.19863	4.48908	-1.33043	-1.63632	4.03615	-0.361248	2.28623	-1.08331	-1.53249	-1.59132	-1.37441	-0.79222	3.38417	-1.12207	4.07671	4.5299	-1.45183	4.16071	3.84496	2.33698	2.45891	0.455752	4.17945	1.69717	-1.57398	-1.63472	3.99804	3.09419	-1.45027	-1.61629	-1.41896	4.27811	-1.66395	3.67999	3.19108	3.57981	1.36244	1.25657	5.60834
hsa-miR-202-5p	-1.67776	0.576582	-5.34617	2.15649e-07	6.19416e-07	5.76911	DOWN	0.187835	3.73171	0.144357	6.60678	6.85468	5.10149	-0.0980609	5.06079	-0.361248	-1.49655	-1.08331	1.48842	1.53817	-1.37441	-0.79222	-1.15718	-1.12207	-1.67499	1.92998	3.71302	3.74377	-0.666774	-1.29147	2.51114	-1.66137	-0.1693	1.52724	-1.57398	-1.63472	2.56445	-1.4824	-1.45027	-1.61629	-1.41896	-0.7093	-1.12746	4.59888	-1.66156	-0.341174	-1.50963	0.203074	5.63523
hsa-miR-204-5p	1.56083	1.80942	5.59188	6.3239e-08	1.93105e-07	6.96127	UP	-1.64092	3.78628	-1.63331	4.8173	-0.753	8.29854	-1.63632	-1.62016	-0.361248	-1.49655	-1.08331	-1.53249	5.08603	2.53946	3.91525	3.75214	4.19748	-1.36061	0.137596	4.33671	2.78733	2.39393	-1.29147	-1.57603	3.92829	-1.62534	-1.65392	-1.57398	2.31121	-0.35723	2.36632	-1.45027	-1.61629	-1.41896	4.02437	2.30895	-0.884943	1.77436	3.9831	1.77187	4.49633	3.85604
hsa-miR-205-5p	1.05344	1.61036	3.49853	0.000561209	0.00107106	-1.75762	UP	-1.64092	5.28468	0.812139	4.75268	5.12123	3.68744	-1.63632	-1.62016	-0.361248	-1.49655	-1.08331	-1.53249	3.29647	4.58883	-0.79222	4.4578	-1.12207	-1.67499	2.69633	-1.45183	1.80887	0.976035	-1.29147	-1.57603	-1.66137	-1.62534	-1.65392	4.19573	1.78763	-1.64422	-1.4824	-1.45027	-1.61629	-1.41896	4.39171	4.05054	-0.884943	3.77244	1.97928	1.8549	4.51115	4.51463
hsa-miR-208a-5p	1.01812	5.1013	4.34416	2.09526e-05	4.82004e-05	1.35638	UP	7.92593	7.74304	6.66236	4.1644	6.8879	6.43899	6.61151	6.54426	4.62652	4.67093	4.89123	5.85785	4.55091	6.954	6.70052	4.18994	-1.12207	5.54611	6.03368	5.89553	7.11318	6.31589	6.64345	5.64663	6.5971	5.79237	5.26856	5.22607	6.5367	6.01915	6.55715	5.77261	5.75423	5.48305	-0.7093	5.22388	3.7959	5.99907	6.92964	2.89189	5.4434	5.21711
hsa-miR-20a-5p	-1.02007	0.191599	-3.35163	0.000938611	0.00173579	-2.23753	DOWN	-1.64092	-1.56057	1.06385	0.21273	-0.753	4.08613	-1.63632	-1.62016	-0.361248	-1.49655	2.76263	5.55209	4.435	3.59254	-0.79222	5.62214	4.7465	1.39101	3.187	-1.45183	1.02202	4.16637	-1.29147	-1.57603	-1.66137	0.344304	5.37939	-1.57398	-1.63472	-1.64422	-1.4824	-1.45027	-1.61629	5.13694	8.0894	-1.66395	4.22873	-0.8949	-1.66329	4.72407	1.33735	3.71929
hsa-miR-20b-5p	-1.80303	0.751427	-5.99803	7.65201e-09	2.6452e-08	9.02013	DOWN	-1.64092	4.40594	-1.63331	5.53804	4.29223	5.13343	3.67999	0.66013	4.08783	5.21932	3.79383	4.48196	2.66273	4.36828	4.65639	3.52452	-1.12207	2.41758	2.14735	2.43383	-1.63778	2.72795	-1.29147	1.06385	-1.66137	4.68003	3.29254	-1.57398	-1.63472	2.10772	-1.4824	1.80887	-1.61629	-1.41896	-0.7093	-1.66395	-0.884943	0.648109	3.38598	-1.50963	3.31979	5.68785
hsa-miR-21-5p	-1.17216	0.824671	-3.84039	0.000158736	0.000329415	-0.569694	DOWN	-1.64092	1.55887	-1.63331	2.61326	4.94153	-1.33043	3.4561	0.291774	4.61993	4.07867	2.99727	-1.53249	2.55384	3.82987	5.14478	4.48579	3.18161	-1.67499	3.22132	4.37925	3.34353	4.47655	-1.29147	3.15323	-0.67113	2.07611	1.61827	-1.57398	3.51056	1.27279	-1.4824	4.40978	2.00561	4.49633	6.97687	-1.66395	-0.884943	3.11725	4.66726	4.14167	1.97404	3.57552
hsa-miR-211-3p	-1.03179	7.06419	-16.8938	3.21901e-42	1.01935e-40	85.284	DOWN	7.68892	7.23627	8.29854	7.40263	7.21241	7.16294	7.39062	7.54583	7.53124	7.73003	7.88185	7.70433	7.23627	7.35223	7.07717	7.17558	7.01953	7.53124	7.63577	7.50615	6.80126	7.34033	7.50615	7.36533	7.31679	7.77781	7.12574	7.67375	7.36533	7.21241	7.59813	7.53124	7.35223	7.1997	7.34033	7.68892	7.03812	7.75579	6.73041	7.4534	7.01953	7.5187
hsa-miR-2113	2.12926	0.544971	8.76746	4.06068e-16	2.73376e-15	25.5098	UP	-0.0322261	-1.56057	4.59673	1.98633	-0.753	-1.33043	-1.63632	-1.62016	-0.361248	-1.49655	-1.08331	-1.53249	4.05463	-1.37441	-0.79222	-1.15718	-1.12207	-1.67499	-1.63592	-1.45183	-1.63778	-1.67642	-1.29147	-1.57603	-0.742883	-0.27427	-1.65392	-1.57398	2.70993	-1.64422	-1.4824	-1.45027	-1.61629	1.76169	-0.7093	-1.66395	-0.884943	-0.662148	-1.66329	-1.50963	-1.60817	-1.14451
hsa-miR-2114-3p	-2.26358	0.833479	-7.79897	2.14036e-13	1.13901e-12	19.3178	DOWN	3.24884	3.9303	5.81821	3.84496	4.24616	-1.33043	1.98383	0.360883	-0.361248	2.31121	-1.08331	4.32034	1.66883	3.39876	-0.79222	3.9303	4.45971	7.41369	2.8798	-1.45183	-1.63778	3.63148	2.42082	2.12962	0.165139	3.26271	4.83611	3.01364	3.67564	-1.64422	-1.4824	1.71947	3.66108	5.48829	5.80161	1.96437	4.98823	5.09793	3.2753	-1.50963	-1.60817	5.02757
hsa-miR-2115-5p	-1.21763	-0.104277	-4.88799	1.90757e-06	4.91752e-06	3.65915	DOWN	-1.64092	-1.56057	4.48196	3.90356	-0.753	-1.33043	1.23051	-1.62016	-0.361248	2.80826	4.20982	4.26767	1.18146	-1.37441	3.97192	4.30745	-1.12207	3.90356	2.78981	-1.45183	-0.103561	-0.762204	-1.29147	1.64125	2.83197	-1.62534	0.533398	1.64125	2.72795	2.35547	-1.4824	2.78281	-1.61629	-1.41896	-0.7093	-1.66395	-0.884943	3.97554	-1.66329	-1.50963	-1.60817	-1.14451
hsa-miR-214-5p	2.19298	0.615096	8.38911	4.91241e-15	3.05833e-14	23.0446	UP	-0.39533	0.812139	-1.63331	2.16924	-0.753	-1.33043	-1.63632	1.05752	-0.361248	-1.49655	-1.08331	-1.53249	0.799961	-1.37441	-0.79222	2.89189	-1.12207	2.33482	-1.63592	2.20953	-1.63778	0.957539	-1.29147	-1.57603	0.536643	-1.62534	-0.633357	2.29345	1.88488	-1.64422	2.83425	-1.45027	-1.61629	-1.41896	-0.7093	-1.66395	-0.884943	4.99997	-1.66329	4.00182	2.13949	-1.14451
hsa-miR-215-3p	-1.72494	0.115676	-6.59782	2.82352e-10	1.12633e-09	12.2495	DOWN	-1.64092	1.14459	-1.63331	4.26017	-0.753	-1.33043	3.11518	3.72995	-0.361248	3.35015	-1.08331	-1.53249	-1.59132	-1.37441	-0.79222	-1.15718	4.85201	-0.386083	3.71718	3.25896	2.00799	-1.42301	-1.29147	-1.57603	0.66013	3.68392	0.271187	2.61326	2.23036	-1.64422	1.80887	2.53946	-1.61629	-1.41896	4.75268	0.553917	3.79176	-1.66156	-1.66329	2.19389	4.70033	3.6089
hsa-miR-217	-1.23089	-0.134202	-4.71209	4.2382e-06	1.05646e-05	2.88979	DOWN	0.0366913	-1.56057	-1.63331	-1.6019	-0.753	2.15508	-1.63632	1.69717	-0.361248	-1.49655	-1.08331	1.64125	1.61497	2.48213	-0.79222	-1.15718	-1.12207	2.76909	-0.566961	2.42082	0.860504	-0.685709	-1.29147	2.60332	1.84564	-1.62534	-1.65392	4.91886	-1.63472	3.35843	5.38152	-1.45027	-1.61629	4.38813	-0.7093	4.29573	4.2137	-1.66156	-1.66329	-1.50963	4.05632	-1.14451
hsa-miR-219a-1-3p	-1.03405	-0.803619	-5.05598	8.72131e-07	2.33509e-06	4.41526	DOWN	-1.64092	-1.56057	0.455752	2.9577	-0.753	-1.33043	0.892922	-1.62016	-0.361248	-1.49655	-1.08331	2.30652	-1.59132	-1.37441	-0.79222	-1.15718	-1.12207	-1.32827	0.465687	-1.45183	-1.63778	-1.67642	-1.29147	-1.57603	-1.66137	-0.0272174	-1.65392	-1.57398	-1.63472	-1.64422	-1.4824	6.61624	-1.61629	-1.41896	-0.7093	-1.14451	-0.884943	-1.66156	-1.66329	2.79452	-1.60817	-1.14451
hsa-miR-219b-3p	-1.67273	-0.183405	-6.0978	4.48469e-09	1.59767e-08	9.5421	DOWN	-1.64092	3.88913	-1.63331	-1.6019	-0.753	4.0615	-1.63632	5.44127	-0.361248	-1.49655	-1.08331	-1.53249	-1.59132	-1.37441	-0.79222	-1.15718	-1.12207	2.61561	-1.63592	-1.45183	-1.63778	-1.67642	-1.29147	4.11671	-0.7469	0.0720478	-1.65392	-1.57398	-1.63472	-1.64422	2.02864	1.79793	0.465687	1.70991	4.87946	-1.66395	-0.884943	-1.66156	-1.66329	-1.50963	-1.60817	3.55274
hsa-miR-219b-5p	1.23847	0.566714	4.39434	1.69472e-05	3.9339e-05	1.55937	UP	-1.64092	6.22219	-1.63331	-1.6019	-0.753	-1.33043	-1.63632	-1.62016	-0.361248	-1.49655	-1.08331	-1.53249	-1.59132	1.8873	-0.79222	-1.15718	-1.12207	4.27467	-0.288387	-1.45183	-1.63778	-1.48667	-1.29147	-1.57603	-0.436817	-1.62534	-1.65392	2.7052	2.49747	-1.64422	-1.4824	-1.45027	5.69069	-1.41896	-0.7093	1.97928	-0.884943	1.70152	3.05715	-1.50963	-1.60817	-1.14451
hsa-miR-22-3p	-4.07682	4.25212	-14.8444	1.91971e-35	4.06947e-34	69.7375	DOWN	3.31762	6.04693	5.88274	5.63807	7.71619	7.05546	6.66236	5.73111	6.61624	7.10043	5.8517	6.49207	8.18226	6.58783	6.5367	7.66116	6.61151	6.39115	6.79086	7.39062	8.01548	6.8179	5.55739	6.80126	7.18754	7.04373	6.99374	6.5367	6.09381	5.61119	4.6325	6.29462	6.81292	6.37834	7.35223	7.10043	5.78394	4.94153	5.30475	5.97244	7.64764	6.1037
hsa-miR-221-3p	-1.66627	2.31771	-5.71664	3.34203e-08	1.0557e-07	7.5822	DOWN	0.402804	4.87946	2.41758	3.88174	5.20867	4.58883	3.48503	4.98038	4.09973	4.39909	5.01773	5.35677	5.56246	3.83347	-0.79222	5.52794	6.02673	-1.38543	3.0278	2.62325	5.59787	5.39783	4.33301	5.47284	3.32441	1.76169	4.00964	3.50427	4.39171	4.07474	-1.4824	-1.45027	-1.61629	6.06192	8.01548	5.02757	-0.884943	4.10432	3.04843	-1.50963	1.85002	5.56246
hsa-miR-222-3p	-2.64577	1.61733	-9.48321	3.16567e-18	2.43842e-17	30.3165	DOWN	3.39241	5.08603	2.85313	5.86461	4.69289	4.64705	-1.63632	2.52346	-0.361248	5.79527	5.44855	4.73369	4.65245	3.28286	4.92252	5.19381	3.31979	0.821593	-1.63592	2.24437	3.60072	2.77628	5.21932	2.65845	2.86215	3.4806	-1.65392	3.81548	1.43281	3.55759	2.09581	-1.45027	3.34353	5.0076	7.13178	3.96828	4.3701	1.59224	-1.66329	2.61796	2.26683	3.2471
hsa-miR-222-5p	1.05421	-0.349337	4.96832	1.3152e-06	3.44233e-06	4.01817	UP	0.786813	5.02757	-1.63331	-1.6019	-0.753	-1.33043	0.0659652	-1.62016	-0.361248	-1.49655	-1.08331	-1.53249	-1.59132	-1.37441	-0.79222	-1.15718	-1.12207	-1.67499	-1.63592	-1.45183	-1.63778	-1.51354	-1.29147	-1.57603	-1.66137	-1.62534	-1.65392	-1.57398	-1.63472	-1.64422	-1.4824	-1.45027	-1.61629	-1.41896	-0.7093	-1.66395	-0.884943	1.14168	-1.66329	-1.50963	1.3252	-1.14451
hsa-miR-223-3p	-1.63912	3.53055	-6.52969	4.15002e-10	1.61775e-09	11.8719	DOWN	0.422937	5.91445	4.05632	5.36518	5.70775	4.97087	4.84427	5.78394	4.72972	5.25809	-1.08331	3.17952	5.41127	6.61624	5.60834	4.15899	-1.12207	5.88274	5.40689	5.18987	6.37834	6.29462	4.18132	5.95868	5.15699	5.78394	4.78681	3.02962	5.2662	5.64663	4.05054	5.59259	2.95536	6.87665	4.81341	5.18774	4.34713	-0.572222	3.987	4.96895	5.2413	2.66741
hsa-miR-224-5p	-1.21092	0.545132	-4.11501	5.39022e-05	0.000117667	0.454885	DOWN	-1.64092	3.81548	-1.63331	4.02047	-0.753	-1.33043	0.812139	3.35843	-0.361248	4.5186	-1.08331	3.97373	3.16633	4.24811	4.70739	5.03745	3.56606	2.90422	1.78515	-1.45183	3.94484	4.36253	-1.29147	3.11128	0.0659652	-1.62534	2.2912	1.60497	-1.63472	1.64125	-1.4824	1.43546	-1.61629	5.27977	4.89853	1.07899	-0.884943	-1.66156	-1.66329	4.40094	-1.60817	3.19339
hsa-miR-2276-3p	1.64346	2.585	6.33612	1.22217e-09	4.54987e-09	10.8138	UP	0.307704	5.45357	-1.63331	-1.6019	-0.753	-1.33043	4.14363	3.31762	-0.361248	-1.49655	-1.08331	-1.53249	-1.59132	-1.37441	3.75214	-1.15718	-1.12207	-0.937509	2.64117	1.90973	3.66108	3.15756	3.94113	3.22967	4.0689	1.95872	3.9831	4.67093	4.31856	0.23627	4.56694	1.53566	2.9405	-1.41896	-0.7093	1.80887	-0.884943	3.9303	5.69069	4.08997	4.35079	-1.14451
hsa-miR-2277-3p	1.00133	2.2103	3.38297	0.000842295	0.00156784	-2.13672	UP	0.542578	-1.56057	-1.63331	3.64483	-0.753	3.66287	3.2277	3.93389	-0.361248	1.71947	-1.08331	-1.53249	-1.59132	-1.37441	-0.79222	-1.15718	-1.12207	3.28491	4.85607	4.47494	3.07847	0.183704	-1.29147	3.77612	4.49633	2.32777	-0.0025	4.47817	2.82176	4.26405	3.65176	-1.45027	1.31948	-1.41896	-0.7093	5.49702	-0.884943	3.97192	5.62992	3.73756	0.127491	-1.14451
hsa-miR-2277-5p	2.56721	2.46678	9.90442	1.68823e-19	1.43388e-18	33.2227	UP	1.41789	1.78763	3.52452	3.67174	-0.753	-1.33043	2.42082	-1.62016	-0.361248	2.03283	4.45388	-1.53249	-1.59132	5.30265	-0.79222	-1.15718	4.55293	-1.67499	4.6985	3.346	-1.63778	2.84856	3.4713	4.38813	2.05373	3.95618	4.1341	3.05715	1.84564	1.10068	4.40594	3.42626	-1.61629	-1.41896	3.82808	4.03791	-0.884943	3.83797	-1.66329	3.71506	-1.60817	-1.14451
hsa-miR-2278	2.37948	2.68667	8.99593	8.78649e-17	6.33072e-16	27.0247	UP	-0.480152	4.24811	-1.63331	-1.6019	-0.753	4.31856	-0.141509	3.97554	-0.361248	-1.49655	-1.08331	5.43913	3.39558	2.6536	-0.79222	-1.15718	-1.12207	5.01968	4.34713	2.32777	4.15145	3.48906	3.60464	2.44836	4.50575	3.9831	3.37327	3.16633	4.08783	3.36322	3.78421	3.1706	-1.61629	-1.41896	-0.7093	4.7888	-0.884943	4.91455	1.3252	-1.50963	4.8716	-1.14451
hsa-miR-2355-5p	1.3794	3.18769	5.53585	8.39384e-08	2.51521e-07	6.68582	UP	4.55091	2.81717	-1.63331	-1.6019	3.81167	2.27166	3.52452	5.2542	4.63795	4.86379	-1.08331	-1.53249	4.03615	2.52346	-0.79222	-1.15718	-1.12207	4.15145	3.88913	3.73546	3.82987	4.5	4.8173	4.32584	4.00182	4.78681	4.24421	4.05975	4.69478	4.85201	5.47284	4.22873	4.41663	4.20255	-0.7093	4.96895	4.77896	3.053	1.98633	4.38813	4.72214	-1.14451
hsa-miR-23a-3p	-3.85474	4.96447	-16.7872	7.21958e-42	2.17861e-40	84.479	DOWN	5.13343	6.81292	7.01953	6.66236	7.985	7.66116	7.89693	7.42691	7.67375	8.15064	5.63523	7.57126	8.37758	7.42691	7.41369	8.34582	7.74304	7.71619	7.58504	8.18226	9.18815	8.16719	6.5529	7.55832	7.64764	8.15064	7.81216	6.38641	6.09381	6.56963	5.37447	6.67121	7.49237	7.39062	7.40263	7.46683	6.32807	4.38088	1.93943	5.96559	7.88185	5.34985
hsa-miR-23b-3p	-4.30091	5.02887	-19.16	1.32409e-49	6.40807e-48	102.236	DOWN	1.61168	7.22434	7.29077	7.63577	8.11801	7.61042	7.59813	7.68892	7.4793	8.16719	3.60464	8.01548	8.28178	7.99923	7.32884	8.44524	7.81216	7.89693	7.82565	8.2142	9.11859	8.44524	7.26368	7.70433	7.07717	7.73003	8.10339	7.62351	6.19228	6.61624	5.8768	7.64764	8.2142	7.29077	5.69614	7.61042	5.80507	4.75268	4.27467	5.24986	8.07172	6.11436
hsa-miR-23c	-1.80378	1.05551	-6.01569	6.96477e-09	2.41088e-08	9.11203	DOWN	-0.13057	1.76413	3.6916	5.77878	3.66736	3.57981	2.68237	3.71718	-0.361248	3.36322	-1.08331	1.80332	3.89976	-1.37441	-0.79222	-1.15718	-1.12207	2.54684	0.530152	4.71469	3.00988	-0.813957	3.57767	3.60072	-1.66137	3.17302	-1.65392	0.736457	1.34287	-1.64422	-1.4824	4.46162	4.93023	-1.41896	-0.7093	2.88624	-0.884943	-1.66156	-0.758561	3.33253	-1.60817	5.16716
hsa-miR-24-1-5p	-3.13465	1.66328	-10.3061	9.85719e-21	9.02989e-20	36.0411	DOWN	1.8247	6.97687	1.59817	0.9295	4.91886	4.60103	4.51463	4.20255	-0.361248	2.42082	3.83971	5.18562	3.22132	-1.37441	-0.79222	4.59673	-1.12207	4.54103	5.07821	5.2413	3.88174	3.58824	3.2772	0.527146	2.97524	3.10945	4.08783	-1.57398	-1.63472	4.91886	-1.4824	-1.45027	3.82808	3.32812	-0.7093	1.6249	-0.884943	1.76657	4.92835	-1.50963	1.13527	4.92646
hsa-miR-24-3p	-2.23431	5.80587	-11.3716	4.40556e-24	5.06739e-23	43.702	DOWN	5.8517	7.55207	7.07717	7.59813	7.35223	6.8179	6.87665	6.92436	6.48333	7.68892	6.3698	7.13781	6.73982	7.27766	6.98822	7.68892	7.63577	7.30297	7.4534	7.2493	6.82289	7.21241	7.77076	7.10043	6.68167	6.51006	7.2493	6.68167	5.97948	6.62948	6.5013	7.37779	7.23627	5.75423	6.05458	6.5529	6.51006	5.52315	5.48829	5.88878	6.35648	7.08956
hsa-miR-2467-3p	-3.09305	8.09829	-18.942	6.67949e-49	3.05945e-47	100.622	DOWN	8.11801	11.6381	11.8722	10.9742	10.3214	9.81193	9.77904	9.71488	10.1812	9.02374	10.3402	11.2642	8.78166	9.62635	8.54948	11.0203	11.0708	10.5257	11.1179	10.6977	10.2185	9.18815	7.8603	9.02374	9.56733	9.71488	9.47975	8.49513	10.1812	9.88292	8.47876	10.2631	8.92087	8.24849	7.42691	9.96219	12.0842	8.6956	9.81193	10.1812	9.28104	10.6642
hsa-miR-2681-5p	-1.67073	1.24688	-5.76673	2.5798e-08	8.2922e-08	7.83444	DOWN	0.711143	0.581676	2.82907	-1.6019	4.59265	2.25342	2.47264	1.56808	-0.361248	-1.49655	-1.08331	-1.53249	3.69958	-1.37441	4.77136	-1.15718	3.78204	-0.682776	0.900417	4.94937	3.81167	-0.279474	3.98129	4.37763	3.9962	3.73171	3.95618	4.69289	1.68748	3.80361	3.57552	-1.45027	5.27523	3.31762	-0.7093	2.53638	4.17757	4.0689	2.80384	5.17543	4.2137	-1.14451
hsa-miR-2682-3p	1.60842	2.71185	6.0906	4.66201e-09	1.65166e-08	9.50421	UP	1.89446	-1.56057	1.68748	-1.6019	4.71469	2.26082	4.08997	2.51349	4.96071	-1.49655	4.77547	-1.53249	1.70152	-1.37441	3.39241	-1.15718	6.00583	3.11312	1.77686	-1.45183	2.58651	3.84144	4.19923	3.87279	-1.66137	2.86436	3.1706	4.98823	4.98038	1.6607	3.81167	4.30568	4.34557	-1.41896	-0.7093	4.35862	-0.884943	-0.771522	5.4634	3.51672	1.95872	-1.14451
hsa-miR-2682-5p	-1.28803	0.642856	-4.77948	3.12946e-06	7.90844e-06	3.18183	DOWN	3.25896	2.47519	3.3135	-1.6019	-0.753	2.96235	-0.470678	3.97947	-0.361248	2.96235	5.27307	6.40475	-1.59132	-1.37441	-0.79222	4.96699	2.79216	1.85002	0.307704	2.44836	2.85313	-1.43986	2.26082	-1.57603	-1.66137	-0.153026	-0.216552	-1.57398	4.03968	2.74543	-1.4824	2.62325	-1.61629	3.95049	4.7888	-1.66395	-0.884943	3.39876	-1.66329	3.55517	-1.60817	4.22673
hsa-miR-26a-2-3p	-1.81166	0.886704	-6.02397	6.66356e-09	2.30973e-08	9.15521	DOWN	-1.64092	2.98174	2.73631	6.11436	4.31856	2.65845	4.57035	1.80332	-0.361248	-1.49655	4.38248	3.56173	3.97947	2.34647	-0.79222	-1.15718	4.68938	-1.20028	5.26856	3.31154	3.37748	-0.433363	-1.29147	-1.57603	-1.66137	-1.62534	2.6084	-1.57398	1.1749	-1.64422	1.62802	-1.45027	4.1149	-1.41896	-0.7093	0.991609	-0.884943	-1.66156	-1.66329	4.67828	-1.60817	3.35015
hsa-miR-26a-5p	-3.43676	1.91245	-11.7136	3.54184e-25	4.3888e-24	46.2078	DOWN	-1.64092	5.44855	3.65549	5.18357	5.06672	4.27467	4.57589	4.15708	-0.361248	4.28898	3.4623	3.69958	2.75019	3.1445	-0.79222	5.35677	5.7668	5.15475	5.55739	5.15252	5.23024	5.21062	3.86934	4.80007	3.93754	5.25809	5.35677	3.63781	0.217309	4.58883	-1.4824	3.85604	2.06294	-1.41896	-0.7093	1.83204	3.2277	4.50768	-0.786957	-1.50963	3.45834	4.26405
hsa-miR-26b-3p	2.54728	2.29991	9.38381	6.27439e-18	4.77561e-17	29.6386	UP	3.97373	1.90973	0.68857	4.05801	4.38611	-1.33043	-1.63632	-1.62016	-0.361248	-1.49655	-1.08331	5.73613	-1.59132	5.69069	-0.79222	3.93389	3.53429	-1.67499	2.32777	3.63781	2.6084	3.89976	-1.29147	-1.57603	-0.244	-1.62534	-1.65392	-1.57398	0.041887	0.521113	-1.4824	-1.45027	-1.61629	4.39345	4.89502	1.03858	4.32914	4.38992	4.37763	1.5485	2.78077	-1.14451
hsa-miR-26b-5p	-2.00988	0.54304	-6.80132	8.80255e-11	3.67729e-10	13.3932	DOWN	0.623074	-1.56057	2.66507	4.99216	-0.753	2.8798	3.97947	3.76843	-0.361248	1.29488	-1.08331	2.79935	-1.59132	-1.37441	-0.79222	2.67792	4.48579	1.79003	-1.63592	-1.45183	-0.22203	0.247109	2.714	-1.57603	-1.66137	2.83653	1.88022	1.6249	2.13168	3.69359	1.25657	-1.45027	-1.61629	-1.41896	-0.7093	4.50381	-0.884943	4.55472	-0.801978	-1.50963	0.422937	3.75616
hsa-miR-27a-3p	-1.81555	0.98778	-5.81821	1.97404e-08	6.43383e-08	8.09534	DOWN	1.93943	4.27811	-1.63331	1.75956	4.6858	4.4578	3.71098	6.73982	4.11309	4.83233	-1.08331	-1.53249	-1.59132	4.59888	-0.79222	4.5565	3.1307	1.88982	4.60848	5.62992	2.98749	3.53887	-1.29147	2.84466	-1.66137	1.39101	-1.65392	-1.57398	-1.63472	2.78981	-1.4824	-1.45027	-1.61629	-1.41896	5.5058	3.40838	4.59888	-1.00322	2.48753	1.78515	4.47655	4.85607
hsa-miR-27b-3p	-1.98765	1.35408	-6.70687	1.51622e-10	6.21263e-10	12.8594	DOWN	1.58722	5.32017	3.04332	6.06583	3.9831	-1.33043	2.15987	3.65176	-0.361248	2.47091	3.75616	1.65816	3.00098	3.28286	-0.79222	-1.15718	-1.12207	1.18783	1.85752	4.64146	4.67828	4.5186	3.74377	2.9428	2.98174	3.55759	1.82936	-1.57398	1.18146	4.05054	3.73546	2.82176	3.53887	-1.41896	-0.7093	-0.96245	-0.884943	2.86215	2.95536	4.96502	2.13374	-1.14451
hsa-miR-28-3p	1.04923	0.630369	3.63006	0.000349001	0.000685442	-1.31224	UP	-1.64092	3.89621	3.55759	-1.6019	-0.753	2.60332	-1.63632	-1.62016	-0.361248	-1.49655	-1.08331	-1.53249	2.88996	4.21556	4.68003	-1.15718	-1.12207	1.33398	2.77628	-1.45183	1.09418	-1.09715	-1.29147	-1.57603	-1.66137	-1.62534	0.224404	-1.57398	-1.63472	0.700052	-1.4824	-1.45027	-1.61629	-1.41896	-0.7093	-0.511787	-0.884943	4.36646	3.90711	-1.50963	-1.60817	3.86417
hsa-miR-28-5p	-1.52981	1.61804	-5.19709	4.45215e-07	1.22925e-06	5.06615	DOWN	-0.51827	5.71355	-1.63331	2.01421	-0.753	4.4028	5.08391	4.84427	-0.361248	3.24299	3.7621	1.59817	-1.59132	-1.37441	-0.79222	5.23644	3.11952	4.27467	2.10296	1.74602	4.80581	4.35079	3.2277	1.79243	0.89667	-1.62534	2.47091	-1.57398	2.02624	3.28491	-1.4824	-1.45027	3.69359	2.36837	6.25329	3.53887	5.12123	2.97524	0.700052	4.57768	5.20251	5.30265
hsa-miR-296-3p	-1.32862	6.79113	-16.5058	6.11093e-41	1.74161e-39	82.3503	DOWN	7.07717	7.40263	7.868	6.98822	7.2493	6.96498	6.75993	7.08956	7.31679	7.2493	7.53124	7.83912	7.35223	7.49237	7.22434	8.49513	7.985	7.67375	7.71619	7.96913	6.77033	7.1997	7.89693	7.64764	7.17558	7.07717	7.64764	7.73003	7.2493	7.35223	7.34033	7.81216	8.13403	7.82565	4.5186	7.37779	7.59813	7.04373	6.63407	7.4793	6.63407	8.07172
hsa-miR-298	-2.13516	1.65165	-7.57006	8.88483e-13	4.45109e-12	17.9145	DOWN	-1.64092	4.19748	2.01998	4.77896	3.67174	3.44543	4.33671	3.48282	-0.361248	5.20672	-1.08331	5.19835	4.44834	4.05463	5.64091	5.00389	4.77547	4.33671	2.36632	2.78077	2.82397	4.40978	-1.29147	4.46998	4.44634	2.75019	3.15323	4.07474	4.72407	-1.64422	-1.4824	-1.45027	-1.61629	4.11671	5.42027	1.79793	3.32812	4.29573	5.59259	1.69934	1.5818	3.67999
hsa-miR-299-3p	-1.40903	1.05814	-4.75696	3.46458e-06	8.72951e-06	3.08384	DOWN	-0.644087	4.85963	2.03756	4.81341	5.04873	-1.33043	2.61326	-1.62016	-0.361248	1.23051	-1.08331	4.69666	3.83971	-1.37441	-0.79222	4.68177	2.61796	-1.67499	0.297787	-1.45183	-0.0677913	3.4961	-1.29147	4.01677	4.30933	1.41789	3.0751	-1.57398	-1.63472	2.25825	-1.4824	3.63148	-1.61629	4.80954	5.393	-1.66395	4.42046	2.72115	-1.66329	4.47655	0.818074	5.18151
hsa-miR-299-5p	1.53711	1.55662	5.55496	7.62284e-08	2.30301e-07	6.77953	UP	-1.64092	1.81372	-0.3013	-1.6019	4.05463	2.07338	3.50839	2.16924	-0.361248	3.10067	-1.08331	4.70739	-1.59132	5.02336	-0.79222	-1.15718	-1.12207	5.17754	4.75268	-1.45183	3.45387	-1.45762	-1.29147	1.98383	1.96956	1.46713	1.50246	-1.57398	-1.63472	2.52847	-1.4824	2.2231	2.92444	-1.41896	-0.7093	-1.66395	-0.884943	3.36727	0.355809	1.92998	3.2772	-1.14451
hsa-miR-29b-1-5p	-4.15166	2.10517	-14.344	8.71229e-34	1.68023e-32	65.9372	DOWN	5.26856	6.20004	3.3135	6.5013	5.04873	5.58256	5.13891	5.44127	5.0076	5.22825	6.0121	7.33459	5.28915	5.42924	5.78394	6.5013	5.62992	5.44855	6.16939	5.79527	5.63523	5.64663	4.19177	5.32916	4.52056	5.61951	5.03547	5.78394	4.93422	5.30684	4.46162	4.56694	5.7668	4.99216	4.30568	3.72577	4.40786	1.57093	4.19573	4.37203	4.5565	4.55293
hsa-miR-29b-2-5p	-1.72393	1.44417	-5.87878	1.43779e-08	4.78016e-08	8.4045	DOWN	3.90166	4.9377	4.61993	3.28687	-0.753	-1.33043	4.25593	4.4578	4.7408	4.83611	2.83197	6.20723	4.59469	4.24049	3.28491	5.8517	5.9265	0.972622	4.96502	4.39171	4.20089	4.62855	-1.29147	4.91886	2.55161	3.58621	4.23262	4.09973	4.56	4.24811	2.19929	4.70383	3.40838	5.18774	5.09332	1.68078	5.88274	2.41435	-0.451546	4.66174	3.94846	-1.14451
hsa-miR-29b-3p	-4.4446	3.44527	-19.6443	3.68984e-51	1.97176e-49	105.804	DOWN	2.98749	6.47862	5.2542	6.18432	5.96902	6.42195	5.47284	5.89215	5.427	6.07707	7.06565	7.39062	6.16939	6.40475	5.84298	6.5367	7.34628	6.24579	6.954	6.8879	5.78948	5.99907	5.82415	6.30348	5.7668	5.89553	6.28646	6.56963	5.99907	5.63523	5.72552	6.00583	6.27788	4.23676	6.34335	4.95715	5.32442	4.43136	4.32034	5.36057	5.59787	6.58783
hsa-miR-29c-3p	-1.28199	0.998023	-4.23992	3.23621e-05	7.22444e-05	0.941094	DOWN	0.105422	3.94665	-1.63331	3.5639	-0.753	2.37042	4.40094	-1.62016	-0.361248	1.5089	-1.08331	4.24049	5.15475	-1.37441	-0.79222	-1.15718	3.89087	3.88174	1.77187	-1.45183	2.11964	0.436335	3.29069	0.839361	0.159209	2.47993	2.01421	3.18369	2.40219	2.82176	-1.4824	-1.45027	-1.61629	-1.41896	-0.7093	0.198104	5.8768	3.91125	0.195567	1.5485	-1.60817	3.13748
hsa-miR-29c-5p	1.05321	0.00855381	4.33694	2.15991e-05	4.96431e-05	1.32733	UP	-1.64092	-1.56057	-1.63331	-1.6019	-0.753	2.37976	-1.63632	0.350061	-0.361248	-1.49655	-1.08331	-1.53249	-1.59132	-1.37441	-0.79222	-1.15718	-1.12207	-1.67499	-1.63592	-1.45183	-1.63778	-0.952257	3.02598	-1.57603	-1.66137	-1.62534	-1.65392	-1.57398	1.81372	-1.64422	-1.4824	3.8263	2.33482	-1.41896	4.16242	-1.66395	-0.884943	2.76448	2.1222	1.22297	-1.60817	-1.14451
hsa-miR-301a-5p	-1.27549	-0.103081	-5.03078	9.8198e-07	2.61284e-06	4.30054	DOWN	3.36727	1.0289	3.87447	-1.6019	-0.753	-1.33043	-1.63632	1.4609	-0.361248	1.39101	3.91525	4.03968	0.900417	3.05072	-0.79222	6.56139	5.80852	1.19403	-1.63592	-1.45183	-0.176439	-0.694065	-1.29147	3.24299	-1.66137	1.97666	-1.65392	3.42855	1.07321	3.63465	1.64125	2.05973	3.35443	-1.41896	-0.7093	1.56205	3.67564	-1.66156	4.46162	1.39101	2.80384	-1.14451
hsa-miR-302b-3p	-1.2319	0.341716	-4.14441	4.78539e-05	0.000105542	0.568191	DOWN	0.262087	-1.56057	-1.63331	3.71718	3.63781	-1.33043	-1.63632	2.86215	-0.361248	3.99436	-1.08331	-1.53249	-1.59132	-1.37441	-0.79222	-1.15718	-1.12207	5.12913	0.302309	4.07277	1.39618	2.85817	-1.29147	-1.57603	-1.66137	-1.62534	0.335133	-1.57398	-1.63472	-1.64422	-1.4824	-1.45027	-1.61629	-1.41896	6.08348	-1.66395	-0.884943	-1.66156	-0.547117	-1.50963	-1.60817	4.80954
hsa-miR-302c-5p	-1.54703	4.2622	-10.1951	2.16991e-20	1.95292e-19	35.258	DOWN	2.38649	4.49633	4.22473	6.64345	4.96502	5.19381	4.54103	5.393	4.77136	5.02547	5.18562	5.83636	4.92252	5.82125	3.6089	5.01578	5.16117	5.77569	5.5109	5.78948	4.66352	5.42924	5.36057	5.20251	4.92252	4.8173	4.99404	5.20462	3.95618	5.82705	3.346	4.85607	2.61326	3.7282	5.02757	3.37149	6.17688	4.75642	4.66352	4.73896	4.48908	6.07707
hsa-miR-3064-3p	1.86596	1.32029	6.51013	4.63312e-10	1.78706e-09	11.7639	UP	1.21525	4.72214	-1.63331	-1.6019	-0.753	-1.33043	-1.63632	2.15508	-0.361248	-1.49655	-1.08331	-1.53249	-1.59132	-1.37441	-0.79222	-1.15718	-1.12207	3.3373	-1.63592	-1.45183	1.34287	1.34287	-1.29147	-1.57603	1.8247	-1.62534	-1.65392	4.27126	-0.501604	0.521113	1.65502	-1.45027	2.44121	-1.41896	-0.7093	2.48753	-0.884943	2.53946	3.57026	-1.50963	3.88376	-1.14451
hsa-miR-3065-3p	1.26364	0.808101	4.36203	1.94322e-05	4.48235e-05	1.42843	UP	-1.64092	3.85807	1.4012	-1.6019	-0.753	-1.33043	0.341078	-1.62016	-0.361248	-1.49655	-1.08331	-1.53249	3.0386	-1.37441	4.78681	-1.15718	-1.12207	-1.67499	-0.57767	4.64509	-1.63778	9.25687	-1.29147	0.805439	-1.66137	-1.62534	-1.65392	3.08366	3.17952	-1.64422	3.1706	2.81257	1.25657	-1.41896	-0.7093	-0.0654457	-0.884943	4.99592	-0.419443	-1.50963	3.41525	-1.14451
hsa-miR-30a-3p	-1.01633	1.24081	-3.53365	0.000495011	0.000951088	-1.64012	DOWN	0.21273	1.3252	1.51353	-1.6019	-0.753	-1.33043	2.97524	3.7621	-0.361248	3.35443	2.70756	5.39783	1.80887	-1.37441	4.39171	3.4989	6.10722	2.48213	1.5089	1.98883	2.96235	2.34264	-1.29147	0.969209	2.80826	0.722352	3.43656	-1.57398	1.5302	4.28507	-1.4824	-1.45027	-1.61629	4.4391	6.26125	0.983343	-0.884943	0.460726	-0.88347	1.76169	3.5486	5.58256
hsa-miR-30b-3p	4.45766	2.71646	19.2432	7.14317e-50	3.5235e-48	102.851	UP	2.39171	-1.56057	-1.63331	3.41062	-0.753	-1.33043	-1.63632	-0.0297217	-0.361248	3.21483	-1.08331	-1.53249	1.6364	-1.37441	-0.79222	-1.15718	-1.12207	1.56205	-1.63592	-1.45183	1.85002	0.79675	2.61796	3.20369	4.48908	1.65816	2.66507	2.65603	2.86215	1.34849	2.77406	-1.45027	2.10296	-1.41896	4.5339	3.73358	-0.884943	1.69717	-0.0980609	1.40669	2.91739	-1.14451
hsa-miR-30c-1-3p	2.14635	4.74994	10.0773	4.99532e-20	4.35817e-19	34.4307	UP	4.85607	0.603696	6.12597	0.839361	5.23024	-1.33043	5.2149	4.83999	5.36057	5.73613	-1.08331	1.75225	5.81517	5.47857	5.61951	4.61993	6.5529	0.0565565	4.94538	4.32914	4.8173	5.14087	4.45971	5.00193	5.18151	4.85963	5.53518	4.23262	5.42476	5.21932	4.33671	5.11327	4.76406	5.43427	5.53037	4.27126	4.69289	4.87536	5.19835	5.49049	0.573509	3.31154
hsa-miR-31-5p	-1.23545	1.07725	-4.14339	4.8052e-05	0.000105888	0.564258	DOWN	-1.64092	1.77976	4.6985	1.80332	-0.753	-1.33043	0.203074	4.4391	-0.361248	3.77612	-1.08331	5.17754	4.14713	4.22873	3.99436	4.44298	4.93223	1.48542	3.8601	4.27997	3.29647	-0.572222	-1.29147	2.14947	2.29345	1.27279	-1.65392	-1.57398	0.159209	1.80332	-1.4824	-1.45027	-1.61629	4.83999	5.45606	-1.66395	-0.884943	2.40806	2.714	2.80384	-1.60817	5.83287
hsa-miR-3119	-1.15875	-0.618643	-5.42645	1.4506e-07	4.27677e-07	6.1541	DOWN	-1.64092	4.83805	-1.63331	2.12962	-0.753	3.21126	1.07321	3.15323	-0.361248	-1.49655	-1.08331	-1.53249	1.77976	-1.37441	-0.79222	-1.15718	-1.12207	1.13527	-1.63592	-1.45183	-1.63778	-1.67642	-1.29147	-1.57603	-0.896493	-1.62534	0.0910522	3.8711	-1.63472	-1.64422	-1.4824	-1.45027	-1.61629	-1.41896	-0.7093	-1.66395	-0.884943	-1.66156	-1.66329	-1.50963	-1.60817	5.66031
hsa-miR-3121-3p	-1.05394	-0.731381	-4.95327	1.41058e-06	3.68071e-06	3.95054	DOWN	-1.64092	-1.56057	7.61042	-1.6019	-0.753	-1.33043	4.01313	-1.62016	-0.361248	-1.49655	-1.08331	4.77896	-1.59132	-1.37441	-0.79222	-1.15718	-1.12207	-1.30647	1.27279	-1.45183	-1.63778	0.0537957	-1.29147	-1.57603	-0.920035	-1.62534	-1.65392	-1.57398	-1.63472	-1.64422	-1.4824	3.39876	1.76413	-1.41896	-0.7093	-1.66395	-0.884943	-1.66156	-1.66329	-1.50963	-1.60817	-1.14451
hsa-miR-3121-5p	-2.5901	0.949564	-9.21914	1.93558e-17	1.44325e-16	28.5227	DOWN	-1.64092	2.39614	-1.63331	5.92365	-0.753	4.57409	3.2808	3.90356	4.41663	4.65245	-1.08331	-1.53249	3.82987	3.2277	-0.79222	2.58	-1.12207	3.30675	1.21911	1.49731	2.99194	1.4012	3.77244	-1.57603	4.138	0.465687	2.11328	-1.57398	4.44466	0.337852	-1.4824	-1.45027	4.8716	-1.41896	-0.7093	-1.66395	-0.884943	3.20369	1.92998	4.90608	-1.60817	4.27126
hsa-miR-3127-5p	1.98002	1.1198	7.68296	4.4162e-13	2.27918e-12	18.6035	UP	4.22873	-1.56057	-1.63331	-1.6019	-0.753	-1.33043	-0.589017	-1.62016	-0.361248	2.58651	-1.08331	2.46441	2.67202	-1.37441	-0.79222	-1.15718	-1.12207	-1.67499	3.21483	-1.45183	2.66741	2.98375	-1.29147	0.489909	4.39519	-1.62534	0.4497	3.6916	0.422937	1.40669	3.20369	-1.45027	1.49141	1.83473	5.0314	-1.66395	-0.884943	-1.66156	1.67337	-1.50963	-1.60817	-1.14451
hsa-miR-3129-3p	1.15744	0.368231	4.68001	4.89104e-06	1.21096e-05	2.75194	UP	3.40838	-1.56057	4.87536	-1.6019	-0.753	-1.33043	2.41435	-1.62016	-0.361248	-1.49655	-1.08331	1.04186	-1.59132	-1.37441	-0.79222	-1.15718	-1.12207	0.89667	2.82617	2.60332	0.153826	-1.67642	-1.29147	-1.57603	0.332413	-1.62534	0.0249217	-1.57398	-1.63472	1.14168	-1.4824	-1.45027	-1.61629	4.34023	-0.7093	-1.66395	4.35079	3.0386	4.1274	-1.50963	-1.60817	-1.14451
hsa-miR-3130-5p	1.52435	3.34559	6.54402	3.82793e-10	1.50593e-09	11.9511	UP	5.08603	-1.56057	1.95632	1.65502	-0.753	-1.33043	4.07277	3.85604	4.71469	-1.49655	4.59265	4.10893	3.00556	3.38598	-0.79222	3.45834	2.75213	2.33482	2.70088	4.83233	1.33735	4.13191	4.37395	3.23573	3.38417	3.50839	4.95715	3.99265	4.344	4.89502	4.92646	4.45388	3.987	4.97087	3.89621	1.92699	-0.884943	5.47284	4.1203	3.02397	3.35443	3.26592
hsa-miR-3132	1.62102	2.52201	5.67408	4.15887e-08	1.29303e-07	7.36922	UP	3.26271	2.76448	3.00988	0.369626	-0.753	-1.33043	3.60464	3.88746	-0.361248	-1.49655	3.4933	-1.53249	-1.59132	2.60586	-0.79222	4.38408	-1.12207	1.01268	0.932174	-1.45183	1.69478	2.14236	3.74788	-1.57603	0.771743	4.23862	3.89441	1.82936	4.47159	3.73171	2.68672	3.3373	5.13694	5.23223	-0.7093	2.43383	-0.884943	4.23262	5.13891	-1.50963	4.15899	-1.14451
hsa-miR-3133	-1.08866	-0.946961	-5.8129	2.02944e-08	6.58925e-08	8.06836	DOWN	-1.64092	-1.56057	-1.63331	-1.6019	4.11671	-1.33043	2.49239	0.207609	-0.361248	1.77187	-1.08331	0.805439	-1.59132	-1.37441	3.90711	-1.15718	-1.12207	-1.67499	-1.63592	-1.45183	-1.63778	-1.62254	-1.29147	-1.57603	-1.66137	-1.62534	-1.65392	-1.57398	-1.63472	-1.64422	-1.4824	-1.45027	-1.61629	-1.41896	-0.7093	3.15323	-0.884943	-1.66156	-1.66329	5.22825	2.12962	-1.14451
hsa-miR-3137	-1.19497	1.87398	-4.32725	2.24955e-05	5.15187e-05	1.28845	DOWN	5.72552	-1.56057	2.44578	3.21126	-0.753	-1.33043	3.06136	0.542578	-0.361248	3.3373	4.61198	-1.53249	2.41758	4.09591	4.59265	5.44855	5.5409	3.04332	4.46838	4.41143	2.80826	2.02384	2.43923	2.29957	2.11328	4.31856	4.01495	4.74857	-1.63472	4.94345	3.44543	3.52911	3.90356	4.87946	-0.7093	-1.66395	-0.884943	3.45174	1.98633	-1.50963	1.54065	3.16633
hsa-miR-3138	1.31403	0.590718	4.89629	1.83603e-06	4.74738e-06	3.69604	UP	-1.64092	2.37042	-1.63331	-1.6019	-0.753	-1.33043	-1.63632	-1.62016	5.18151	3.25896	2.86657	-1.53249	-1.59132	-1.37441	4.35862	-1.15718	-1.12207	4.62652	-0.391343	-1.45183	2.21867	3.0386	-1.29147	-1.57603	-1.66137	-1.62534	1.87167	-1.57398	1.4609	4.46508	3.21126	3.23967	0.940876	-1.41896	-0.7093	-1.66395	-0.884943	-1.66156	-0.713961	-1.50963	-1.60817	-1.14451
hsa-miR-3139	-1.06361	0.278533	-3.51961	0.00052055	0.000996425	-1.68723	DOWN	3.50427	4.71821	-1.63331	4.27639	-0.753	2.88802	-0.117648	-1.62016	-0.361248	-1.49655	-1.08331	6.61624	1.90511	-1.37441	-0.79222	-1.15718	3.5945	2.91739	3.77244	-1.45183	1.79793	-0.495635	-1.29147	4.07277	-1.66137	2.57502	3.8711	-1.57398	-1.63472	-1.64422	2.73631	4.04706	4.8286	-1.41896	4.77896	1.76169	-0.884943	-1.12207	3.8432	1.33735	1.28214	4.49444
hsa-miR-3143	-1.00086	-0.861795	-5.69775	3.68304e-08	1.1563e-07	7.48756	DOWN	-1.64092	-1.56057	-1.63331	3.70918	-0.753	-1.33043	-1.63632	-1.62016	-0.361248	-1.49655	-1.08331	1.19742	1.6787	-1.37441	-0.79222	-1.15718	-1.12207	0.414261	-0.191865	-1.45183	-1.63778	-1.67642	-1.29147	-1.57603	-1.66137	-1.62534	0.603696	-1.57398	-1.63472	-1.64422	-1.4824	1.78267	4.00182	-1.41896	-0.7093	1.13527	-0.884943	-1.66156	1.90073	-1.50963	1.60497	-1.14451
hsa-miR-3145-5p	1.22346	0.517345	4.63344	6.01346e-06	1.469e-05	2.55328	UP	-1.64092	-1.56057	4.01862	3.22967	3.83797	-1.33043	-1.63632	-1.62016	-0.361248	-1.49655	-1.08331	-1.53249	-1.59132	-1.37441	-0.79222	-1.15718	-1.12207	-1.67499	-1.63592	-1.45183	-1.63778	2.35547	2.6084	-1.57603	-1.66137	-1.62534	3.50159	-1.57398	-1.63472	-0.0794565	-1.4824	3.57552	0.61247	3.73171	-0.7093	-0.8949	4.86578	0.957539	-1.66329	3.71506	-1.60817	-1.14451
hsa-miR-3146	-1.65097	0.0941604	-6.3099	1.41237e-09	5.24273e-09	10.6722	DOWN	1.56808	4.82682	4.40594	-1.6019	4.53782	2.73246	-1.63632	-1.62016	4.44634	-1.49655	-1.08331	-1.53249	3.80361	-1.37441	3.4713	-1.15718	3.43085	1.97666	-1.63592	4.04137	-1.63778	1.93245	-1.29147	-1.57603	-0.67113	-1.62534	-0.542591	2.02384	-1.63472	2.11964	2.18335	-1.45027	1.20081	4.60288	5.01212	-1.66395	-0.884943	2.9451	1.63113	-1.50963	-1.60817	3.30675
hsa-miR-3150b-3p	1.62958	1.05066	5.76986	2.53835e-08	8.17949e-08	7.85023	UP	-0.443174	5.87065	0.568	1.89658	-0.753	-1.33043	3.57767	3.55759	-0.361248	-1.49655	-1.08331	-1.53249	-1.59132	-1.37441	-0.79222	-1.15718	-1.12207	3.58824	-1.63592	-1.45183	1.53817	2.42731	2.8798	0.761002	2.61561	-1.62534	-1.65392	2.09077	-1.63472	4.30568	4.49633	-1.45027	0.940876	-1.41896	-0.7093	1.40394	-0.884943	-0.637328	1.16171	1.8407	2.47264	-1.14451
hsa-miR-3152-3p	-1.07911	-0.552802	-4.74102	3.7223e-06	9.31484e-06	3.01474	DOWN	5.75423	-1.56057	4.50768	0.640874	-0.753	-1.33043	-1.63632	8.46354	-0.361248	-1.49655	-1.08331	-1.53249	-1.59132	2.3751	-0.79222	-1.15718	-1.12207	0.937652	3.46919	-1.45183	-1.63778	-1.48801	-1.29147	-1.57603	-1.66137	1.84564	3.18369	0.65172	-1.63472	1.01573	-1.4824	-1.45027	-1.61629	2.80826	3.55274	1.84564	-0.884943	1.73508	-1.66329	2.84466	0.207609	-1.14451
hsa-miR-3152-5p	-1.30968	1.96032	-4.54582	8.83319e-06	2.10568e-05	2.18394	DOWN	5.45856	1.47925	6.1806	4.70383	-0.753	3.2772	5.15252	4.51289	-0.361248	-1.49655	4.7827	5.00575	-1.59132	5.10526	-0.79222	3.78836	3.81167	4.58497	3.70363	3.25453	-1.63778	4.39714	-1.29147	0.91977	-1.66137	5.31574	4.91039	4.30392	-1.63472	5.35209	2.90043	4.86777	2.78981	2.46441	4.19748	2.33266	-0.884943	4.4028	3.59254	-1.50963	-1.60817	4.0921
hsa-miR-3153	-1.16333	3.95824	-6.82854	7.51913e-11	3.17213e-10	13.5479	DOWN	3.85604	5.27977	0.11543	3.08106	5.31574	5.07821	4.28507	5.27977	4.39171	4.55825	3.94484	1.38479	6.58783	4.03615	-0.79222	5.3378	3.55759	4.76593	4.95312	5.32017	4.86969	5.30684	4.5339	5.3378	4.03615	4.99592	5.34274	5.15065	4.80767	4.5339	5.0314	5.13343	5.35209	5.5409	3.88174	5.30684	6.28646	4.67093	3.61803	5.11918	4.26211	3.23967
hsa-miR-3155b	1.12911	0.548967	4.26615	2.90309e-05	6.53769e-05	1.04478	UP	3.13509	-1.56057	-1.63331	-1.6019	-0.753	-1.33043	1.95392	-1.62016	-0.361248	-1.49655	3.96013	-1.53249	2.7052	-1.37441	-0.79222	3.51274	-1.12207	-1.67499	1.14168	-1.45183	2.09077	1.867	-1.29147	3.57767	-0.872741	-1.62534	1.29488	2.36837	0.524139	-0.540061	-1.4824	2.63375	1.16773	3.4337	-0.7093	4.41663	-0.884943	-1.66156	0.195567	4.22873	3.75616	-1.14451
hsa-miR-3156-3p	1.04764	3.84145	5.21777	4.02974e-07	1.11986e-06	5.16275	UP	4.90417	4.0689	3.88174	1.70152	5.28468	4.8286	4.39519	3.59859	-0.361248	4.62289	4.52434	5.09332	4.67468	3.85604	-0.79222	-1.15718	-1.12207	4.41143	4.44634	4.36449	2.50351	4.65639	5.07022	2.47264	3.96828	2.35081	4.1274	4.52252	4.66726	4.18646	4.6858	5.52078	4.22114	5.52551	4.64146	0.740335	3.68744	4.61624	4.94153	3.29647	3.11952	5.28468
hsa-miR-3156-5p	-1.80331	4.57214	-10.5625	1.57534e-21	1.51339e-20	37.8614	DOWN	3.8711	4.96071	5.34985	5.63807	4.54315	5.47284	5.43427	5.23644	5.69069	4.90225	5.86461	4.5186	4.66174	4.95715	3.90356	5.28915	5.19608	5.4434	6.5367	5.68502	5.41127	5.07238	5.95868	5.45856	5.31109	5.12123	5.5781	5.49702	5.04686	5.9208	4.80581	5.5781	5.95868	4.8716	-0.7093	5.5058	5.84298	5.71065	5.42924	6.62489	4.9728	6.41283
hsa-miR-3160-5p	-3.29708	6.98588	-13.8303	4.3449e-32	7.73935e-31	62.0437	DOWN	10.136	8.10339	10.7312	7.985	6.9407	7.95389	7.49237	6.78104	7.2493	10.6332	7.51243	8.53094	11.4732	7.37779	11.2138	7.99923	8.65844	7.79728	7.54583	7.4793	7.61042	6.26966	10.9742	11.5826	6.85468	7.24278	6.20364	11.7445	6.29462	6.87665	10.9742	6.79086	12.0842	6.32408	10.3402	7.11318	9.56733	11.2642	9.6535	11.9209	7.13781	10.0023
hsa-miR-3165	-1.33094	-0.267589	-5.78951	2.29219e-08	7.40486e-08	7.94966	DOWN	-1.64092	-1.56057	-1.63331	-1.6019	-0.753	-1.33043	2.46918	2.74067	-0.361248	-1.49655	-1.08331	-1.53249	1.82936	1.87797	-0.79222	-1.15718	-1.12207	-1.67499	-1.63592	2.714	2.33698	-0.39533	-1.29147	-1.57603	0.91977	-1.62534	-1.65392	-1.57398	0.11543	-1.64422	3.13748	-1.45027	4.10662	-1.41896	-0.7093	2.89601	-0.884943	4.42046	0.21273	-1.50963	2.99727	-1.14451
hsa-miR-3166	-1.41226	0.270878	-5.42336	1.47307e-07	4.33307e-07	6.13917	DOWN	-0.29677	3.40579	0.560822	2.63887	-0.753	-1.33043	4.02863	-1.62016	4.40978	2.59223	3.68392	5.427	-1.59132	4.63058	-0.79222	-1.15718	-1.12207	2.71882	0.36687	-1.45183	2.77406	-0.0272174	4.02863	1.72357	3.2377	3.20539	-1.65392	-1.57398	2.72349	-1.64422	-1.4824	1.68285	1.78763	-1.41896	-0.7093	2.98375	-0.884943	2.42921	3.66512	2.13374	-1.60817	4.67468
hsa-miR-3173-5p	2.85587	2.00194	10.7468	4.17541e-22	4.19997e-21	39.1799	UP	1.28821	2.72349	3.06354	-1.6019	3.50427	-1.33043	0.626552	3.77986	-0.361248	-1.49655	-1.08331	-1.53249	-1.59132	-1.37441	-0.79222	-1.15718	-1.12207	-1.67499	1.06385	1.55372	-1.63778	1.91732	3.1445	2.47774	2.9405	0.360883	0.146804	-1.57398	-1.63472	4.33671	1.39869	3.70363	3.34353	1.924	-0.7093	3.44543	-0.884943	-1.66156	3.12178	-1.50963	2.88996	-1.14451
hsa-miR-3175	2.10026	4.02722	8.47795	2.74918e-15	1.74545e-14	23.6183	UP	-0.227617	3.85207	-1.63331	-1.6019	-0.753	4.24421	2.98971	5.19608	-0.361248	-1.49655	-1.08331	4.01677	1.65189	-1.37441	-0.79222	3.77244	-1.12207	5.32017	3.37506	3.33253	4.1397	3.58418	4.5	4.10662	3.88174	4.72407	4.96287	4.435	4.35862	4.38408	5.03547	3.6424	4.96502	-1.41896	-0.7093	5.37447	-0.884943	4.25593	3.83167	3.58824	4.88135	-1.14451
hsa-miR-3177-5p	2.06333	3.6983	8.31445	7.98194e-15	4.84011e-14	22.5649	UP	4.32398	3.80973	-0.378457	4.69666	-0.753	3.97554	5.65764	3.41062	-0.361248	1.64663	3.4623	2.17882	2.09581	6.04693	5.08975	-1.15718	2.76448	1.53316	4.58149	2.05373	3.00098	4.56371	3.83347	3.48503	3.91125	3.68744	2.89189	-1.57398	-1.63472	3.35443	-1.4824	3.47604	5.3378	-1.41896	-0.7093	2.00799	-0.884943	4.19177	3.8263	5.01773	1.70991	-1.14451
hsa-miR-3179	-1.45295	-0.558471	-6.52987	4.14597e-10	1.61775e-09	11.8728	DOWN	-0.657337	2.57046	-1.63331	-1.6019	-0.753	-1.33043	2.17882	3.47604	-0.361248	-1.49655	4.0265	3.45387	-1.59132	-1.37441	-0.79222	-1.15718	-1.12207	-1.67499	-1.63592	-1.45183	-1.63778	-1.29147	-1.29147	0.825113	2.45891	-1.62534	-1.65392	-1.57398	-1.63472	-0.675896	-1.4824	-1.45027	2.47774	-1.41896	-0.7093	2.9484	3.55274	-1.66156	-0.303317	-1.50963	-1.60817	-1.14451
hsa-miR-3180	1.09644	8.53314	22.0416	1.05638e-58	1.08385e-56	123.115	UP	8.65844	8.32963	7.44033	6.99927	8.04255	8.19863	9.04921	8.34582	8.01548	7.5187	7.868	7.4534	7.92593	8.18226	8.58256	7.27766	7.39662	7.9113	7.68892	8.0583	7.8526	8.67584	8.46354	8.31358	8.15064	7.95389	7.83912	7.71619	8.07172	8.06501	8.18226	7.868	7.46683	8.86813	7.92593	7.78486	7.84586	8.1107	9.32848	7.89693	8.0894	7.77076
hsa-miR-3180-5p	1.64395	3.81159	6.49511	5.04109e-10	1.93279e-09	11.6812	UP	1.29488	3.0751	4.9728	4.47817	4.03615	5.40013	4.68938	5.34274	-0.361248	3.97947	-1.08331	-1.53249	4.24421	4.33671	-0.79222	-1.15718	4.05632	5.30057	0.149252	3.45834	4.59673	4.87946	4.68938	4.30568	4.32213	2.7302	4.99404	4.46508	3.96231	4.08252	4.67093	-1.45027	-1.61629	-1.41896	4.40594	1.0872	-0.884943	4.96502	3.37149	-1.50963	3.10945	3.64011
hsa-miR-3181	1.20963	0.709257	4.23281	3.33257e-05	7.4223e-05	0.913097	UP	-1.64092	0.733922	-1.63331	-1.6019	-0.753	-1.33043	2.3208	3.57026	-0.361248	-1.49655	-1.08331	-1.53249	-1.59132	1.94678	3.92628	-1.15718	-1.12207	0.591513	2.06294	3.69559	0.00253478	-1.18678	2.15987	2.80605	-1.66137	-1.62534	3.35229	-1.57398	-1.63472	0.867178	3.38417	-1.45027	-1.61629	-1.41896	-0.7093	4.74857	-0.884943	-1.66156	1.57093	-1.50963	1.44116	-1.14451
hsa-miR-3184-3p	2.32991	3.35675	9.47609	3.32505e-18	2.55352e-17	30.2679	UP	-1.64092	2.23731	3.65176	3.40098	-0.753	5.4434	4.45584	4.33486	-0.361248	4.07867	2.89822	1.78267	-1.59132	3.26592	-0.79222	-1.15718	-1.12207	4.21928	1.21911	-1.45183	3.76407	0.275613	4.62855	1.64663	4.05463	2.78077	2.55954	2.65603	4.00964	5.07453	4.52803	-1.45027	4.23676	-1.41896	-0.7093	3.87447	-0.884943	2.12719	5.13128	4.50768	3.6089	4.07083
hsa-miR-3184-5p	3.28624	6.61331	20.6898	1.75547e-54	1.32435e-52	113.43	UP	5.41127	3.36525	5.60834	1.3279	5.01578	5.59787	5.38603	5.02336	5.55739	5.90816	3.12864	-1.53249	6.04693	5.07022	5.62992	5.27977	3.1957	5.22825	5.7164	5.49702	5.53518	5.43913	5.39783	5.15252	5.38365	5.41586	5.50835	5.62477	5.89215	5.55209	5.32916	6.21099	5.56246	4.57768	5.2542	5.33351	5.7668	5.55739	4.8173	4.64146	6.16939	4.53586
hsa-miR-3186-5p	1.34803	0.436086	4.92814	1.58493e-06	4.1189e-06	3.838	UP	-1.64092	5.47857	-1.63331	-1.6019	-0.753	-1.33043	-1.63632	-1.62016	-0.361248	-1.49655	-1.08331	4.23469	-1.59132	-1.37441	-0.79222	-1.15718	-1.12207	2.71882	-1.63592	-1.45183	-1.63778	-1.53977	-1.29147	0.988487	1.34849	-1.62534	3.10945	-1.57398	3.92628	2.40806	3.81843	-1.45027	-1.61629	-1.41896	-0.7093	5.09332	-0.884943	-1.66156	-1.66329	4.23862	-1.60817	-1.14451
hsa-miR-3187-3p	1.07175	5.57353	8.77221	3.93416e-16	2.66256e-15	25.5411	UP	5.10337	4.42046	5.10149	5.45357	4.64901	4.70033	4.74262	5.40689	6.13301	4.85963	6.02673	5.3378	5.97948	5.16531	5.39783	5.99907	6.10722	6.14429	5.18774	5.32442	5.77261	4.70927	4.59265	5.56735	5.90816	6.00897	5.78948	2.19659	5.41127	5.20251	5.33351	4.8173	4.31472	-1.41896	4.7678	4.24992	5.23644	5.41586	5.34761	3.89976	5.56735	4.35862
hsa-miR-3188	1.0281	6.232	7.45188	1.83515e-12	8.93198e-12	17.1998	UP	7.54583	5.74203	4.96071	4.344	6.1037	5.71924	7.00951	5.69069	5.77261	5.87065	5.11327	5.05287	5.48305	6.02673	5.76033	3.70739	5.28468	6.10035	5.74847	5.91445	5.62992	6.27788	6.05458	5.9265	6.06583	6.03977	6.1037	5.95868	5.93222	6.33574	6.57914	6.09699	6.28646	6.99927	-0.7093	5.9384	5.6032	6.0121	6.78104	5.82705	6.56963	5.82125
hsa-miR-3189-5p	1.34071	1.70049	5.01535	1.05575e-06	2.80041e-06	4.23052	UP	5.71355	2.14947	-0.0794565	4.21742	4.18132	3.94846	3.09858	2.02384	-0.361248	1.9492	3.21483	-1.53249	-1.59132	3.58418	-0.79222	-1.15718	2.95071	-0.991578	-1.63592	2.27166	1.4609	3.99094	4.3701	-1.57603	-0.990233	3.02197	4.29573	-1.57398	2.19929	2.06294	1.90511	-1.45027	5.16117	2.87086	-0.7093	1.5089	-0.884943	4.65442	-1.66329	0.969209	-1.60817	-1.14451
hsa-miR-3190-3p	1.16573	3.19143	4.56964	7.96094e-06	1.91197e-05	2.28375	UP	4.45035	3.51056	4.68378	3.5317	-0.753	2.52346	2.88624	4.5489	-0.361248	4.88679	4.66174	-1.53249	3.2734	3.66736	-0.79222	-1.15718	-1.12207	4.0689	3.71098	4.85607	4.40437	3.72132	3.81695	3.36525	3.09649	5.09332	3.33253	5.32017	1.59817	5.24986	3.36083	2.43383	1.24412	-1.41896	-0.7093	4.00557	-0.884943	5.13343	4.30568	2.30895	4.17201	-1.14451
hsa-miR-3190-5p	1.42062	0.926777	5.34617	2.15648e-07	6.19416e-07	5.76912	UP	-1.64092	3.62258	-1.63331	-1.6019	-0.753	3.00098	-1.63632	1.48542	-0.361248	4.24616	3.82987	-1.53249	-1.59132	-1.37441	3.86934	-1.15718	-1.12207	-0.334165	4.68378	2.13661	-1.63778	1.93943	-1.29147	4.14363	-1.66137	0.11543	-1.65392	-1.57398	1.70551	-1.64422	-1.4824	-1.45027	-1.61629	-1.41896	4.48908	-1.66395	4.138	2.42921	3.99265	2.42082	-1.60817	-1.14451
hsa-miR-3191-3p	-1.11433	5.4244	-8.36485	5.75309e-15	3.53877e-14	22.8884	DOWN	4.14713	6.35648	5.67957	6.24175	6.36099	6.46485	6.1407	5.82125	6.32807	6.18432	6.03977	6.11074	5.76033	6.26125	5.62477	7.03251	6.70052	5.83986	6.40475	6.26966	6.41283	6.43899	6.13301	6.03368	5.53037	6.34766	6.00583	5.65206	4.03615	6.47391	5.59259	6.84282	6.70052	4.72214	-0.7093	6.26125	6.01915	5.42924	5.39071	5.26856	5.73362	5.56735
hsa-miR-3191-5p	2.66585	2.36172	10.8712	1.69841e-22	1.79276e-21	40.0733	UP	4.70927	-1.56057	0.171615	1.58722	-0.753	2.31347	3.93572	2.56445	-0.361248	1.3252	4.19573	-1.53249	0.465687	-1.37441	-0.79222	-1.15718	-1.12207	3.46469	2.61796	2.75824	3.56173	3.4623	3.3135	-1.57603	3.39876	1.36547	2.72115	3.2808	2.63631	-0.561517	3.30914	1.7261	-1.61629	4.65818	-0.7093	-0.51827	-0.884943	1.96697	0.0720478	2.11646	-1.60817	3.31979
hsa-miR-3192-3p	1.83974	2.98973	7.44486	1.91564e-12	9.28849e-12	17.1575	UP	5.25809	2.91367	2.1739	2.03073	-0.753	-1.33043	3.89261	0.527146	-0.361248	4.63442	4.39171	4.7678	-1.59132	-1.37441	-0.79222	-1.15718	-1.12207	3.05715	4.61198	-1.45183	4.7465	0.805439	4.13629	4.22294	3.55274	-1.62534	-0.158965	3.37506	5.23644	3.17952	2.68237	2.93589	4.6985	3.81695	-0.7093	3.3373	-0.884943	2.80384	4.71469	2.11646	4.82505	5.14678
hsa-miR-3192-5p	-3.07814	1.82927	-10.76	3.79683e-22	3.8342e-21	39.2743	DOWN	3.91325	-1.56057	4.67648	4.05463	-0.753	4.20627	4.68938	4.50575	-0.361248	3.59647	4.7888	-1.53249	4.95312	-1.37441	-0.79222	-1.15718	4.91886	2.88446	5.64663	4.48579	4.9377	4.85963	3.59647	5.10526	5.393	5.05061	5.40908	3.80361	0.99473	4.7827	4.72972	5.27092	1.47629	6.23365	-0.7093	4.22114	3.87995	1.92998	1.80332	4.13191	4.99404	-1.14451
hsa-miR-3194-3p	-4.20314	6.98174	-17.5916	1.64703e-44	5.63283e-43	90.5421	DOWN	7.78486	10.6642	11.2138	10.3025	8.49513	7.92593	10.5257	9.32848	9.53519	7.82565	10.7731	11.9209	8.0583	9.18815	7.70433	8.11801	12.375	9.00229	8.38686	9.00229	10.136	8.73805	6.66236	7.92593	8.2302	10.9742	8.97867	7.78486	7.53124	9.21144	7.74304	9.84625	7.53124	8.28178	5.91445	9.04921	9.88292	8.46354	9.47975	9.6861	7.31679	9.88292
hsa-miR-3194-5p	2.0672	4.64437	9.52066	2.44459e-18	1.89438e-17	30.5727	UP	4.60472	2.73631	6.90836	2.15987	4.93023	4.98447	4.93023	2.9405	-0.361248	4.5019	3.75214	1.75743	5.00193	4.91039	-0.79222	4.00964	4.20804	5.49049	4.48744	5.11327	4.21742	4.65245	4.49254	4.59673	5.07238	4.61993	3.88913	4.70561	4.91039	3.9775	3.73171	2.75019	3.60072	2.90838	-0.7093	5.1111	4.5	5.16716	4.48007	4.60288	3.01364	3.31545
hsa-miR-3198	1.15891	1.28889	3.79192	0.000190917	0.000391448	-0.744079	UP	-1.64092	-1.56057	-1.63331	-1.6019	-0.753	2.81717	4.60103	2.04004	-0.361248	4.05258	-1.08331	4.39171	2.43383	-1.37441	-0.79222	-1.15718	-1.12207	0.319241	4.84213	-1.45183	-1.63778	3.7959	4.27126	-1.57603	-1.66137	1.48234	0.224404	-1.57398	-1.63472	-1.64422	-1.4824	3.94846	-1.61629	-1.41896	-0.7093	-0.146817	-0.884943	-1.66156	-1.66329	3.69758	-1.60817	4.60472
hsa-miR-3199	1.13558	0.416807	4.36777	1.89667e-05	4.38284e-05	1.45163	UP	-1.64092	5.63523	-1.63331	1.68748	-0.753	-1.33043	-1.63632	-1.62016	-0.361248	-1.49655	-1.08331	-1.53249	-1.59132	-1.37441	-0.79222	-1.15718	-1.12207	4.4391	1.60832	1.93491	2.95302	-0.843939	-1.29147	3.33253	4.17023	-0.121128	1.68517	1.23051	-1.63472	-1.64422	-1.4824	2.68015	1.12867	-1.41896	-0.7093	0.433474	-0.884943	-1.66156	-0.7093	1.03858	1.47333	-1.14451
hsa-miR-32-3p	-1.13506	0.588942	-3.72171	0.000248638	0.000500593	-0.993211	DOWN	-1.64092	4.04137	-1.63331	3.15756	-0.753	5.04312	3.76843	-0.17287	-0.361248	4.12405	4.26211	-1.53249	-1.59132	-1.37441	4.20089	-1.15718	-1.12207	3.91525	1.59521	-1.45183	-1.63778	1.68748	-1.29147	-1.57603	2.30183	-1.62534	0.19303	2.06614	-1.63472	3.74377	2.96661	-1.45027	-1.61629	-1.41896	3.95618	-1.66395	3.10285	-0.818426	-0.985274	4.1644	1.04811	6.57914
hsa-miR-32-5p	-1.39007	0.745757	-4.54554	8.84399e-06	2.1063e-05	2.18276	DOWN	-1.64092	3.02598	3.41286	-1.6019	-0.753	-1.33043	-1.63632	3.20917	-0.361248	4.20089	3.23165	5.14087	5.42476	3.07033	4.28183	4.44634	6.5013	3.44334	1.89658	-1.45183	-0.110383	-0.511787	-1.29147	4.20804	-1.66137	4.87348	-0.0609478	2.05373	-1.63472	2.04253	2.3751	-1.45027	-1.61629	-1.41896	6.22219	-1.66395	-0.884943	0.0340391	-1.66329	-1.50963	3.97947	2.73246
hsa-miR-3202	1.12691	1.74975	4.09074	5.94385e-05	0.000129203	0.36186	UP	4.54526	3.23573	2.76448	-1.6019	-0.753	-1.33043	2.25567	2.48753	-0.361248	-1.49655	-1.08331	4.64509	1.54313	2.73246	-0.79222	-1.15718	-1.12207	2.29957	1.53817	3.9775	3.87816	4.22114	2.5088	3.82233	3.00772	1.73728	-0.381243	4.31664	1.76657	2.78077	-1.4824	-1.45027	4.69114	-1.41896	-0.7093	2.95302	-0.884943	2.91103	0.286152	4.26017	-1.60817	3.17952
hsa-miR-320a	-1.22333	5.86676	-14.1194	4.8184e-33	8.95595e-32	64.2338	DOWN	6.06973	5.89553	6.25329	6.9407	7.26368	6.41283	6.32807	5.77878	6.17688	6.98822	6.62489	6.75993	7.10043	6.56139	6.9407	7.62351	6.38237	7.03251	6.84282	6.65388	7.37779	6.87665	5.98584	6.66236	6.84282	6.54426	6.66236	6.61624	7.41369	5.45856	6.39588	6.26125	6.83266	5.72552	7.21241	5.91445	6.89867	6.46485	6.67121	6.79086	7.17558	7.01953
hsa-miR-320b	-1.72167	4.96801	-13.3772	1.35377e-30	2.25481e-29	58.6196	DOWN	6.43103	4.71115	7.03251	5.31574	6.5529	5.31574	5.70189	4.78681	5.88274	6.1407	6.8879	4.7408	6.98822	5.94583	5.10893	5.97948	6.20004	6.00583	6.04693	5.83287	6.96498	6.56963	6.11074	5.9208	6.52722	6.1407	6.57438	6.20364	6.86541	5.42924	5.69069	5.78948	6.11074	6.46054	6.11798	5.4927	6.5189	6.19228	6.44735	5.81517	5.8517	5.80161
hsa-miR-320c	-1.47837	3.80018	-6.26051	1.85274e-09	6.82798e-09	10.4066	DOWN	5.80852	5.88274	5.34985	6.5367	6.02673	5.0818	5.70775	5.04128	5.26233	5.393	5.45856	4.89312	5.63523	5.56735	-0.79222	4.04706	4.85785	5.06672	4.3112	5.36518	6.45179	5.71924	5.08	4.80581	4.83999	5.51554	5.82415	5.33566	5.60834	3.75001	4.15517	5.16531	5.58256	5.20251	5.27977	4.92252	6.03977	6.03977	5.09332	4.26017	4.95312	5.18987
hsa-miR-320d	-2.69945	2.99207	-9.62062	1.2236e-18	9.59796e-18	31.2587	DOWN	5.94583	-1.56057	4.83999	4.85201	4.99216	5.23223	5.31796	4.77136	5.61405	5.14087	5.57009	1.06997	5.37939	3.33253	3.78421	5.07821	5.56246	5.25809	5.95214	5.17332	6.35197	5.50161	4.63618	5.0314	5.18987	5.07821	5.66864	5.16117	5.43913	3.8263	4.01677	4.75844	4.17023	5.42027	4.94937	2.70993	4.58883	4.60103	4.71821	4.79422	5.96559	4.24049
hsa-miR-320e	-3.32253	2.69181	-12.1935	1.00075e-26	1.38007e-25	49.7546	DOWN	3.53887	3.21939	5.8461	4.38248	6.39588	4.93023	5.03745	3.17302	5.4434	4.8286	5.77261	4.22114	5.74203	4.46838	-0.79222	5.71355	6.36099	3.67369	5.21932	5.73613	6.23772	5.38841	4.85201	5.04686	5.12913	5.23024	5.36057	4.25173	4.8716	0.711143	-1.4824	3.95618	5.6742	-1.41896	-0.7093	4.91455	5.31574	4.48579	3.87279	3.11518	4.49254	5.15699
hsa-miR-323a-5p	1.1686	2.81915	4.64782	5.64264e-06	1.38369e-05	2.61446	UP	3.87816	-1.56057	4.344	-1.6019	-0.753	-1.33043	3.70551	3.91325	-0.361248	2.2775	3.12864	-1.53249	5.0076	3.80361	4.5339	4.99997	-1.12207	2.06614	4.34713	3.4713	3.36938	2.8016	3.17952	4.19573	2.28623	3.12864	4.27126	4.12405	3.84144	2.2775	3.47832	4.92835	0.372383	-1.41896	-0.7093	-0.664461	-0.884943	4.73713	4.51289	4.57222	4.45035	-1.14451
hsa-miR-323b-5p	1.51297	0.611468	6.04328	6.00987e-09	2.10018e-08	9.25607	UP	2.42541	4.57959	-1.63331	-1.6019	4.06529	-1.33043	-1.63632	-1.62016	-0.361248	-1.49655	-1.08331	-1.53249	2.5088	-1.37441	-0.79222	-1.15718	-1.12207	-1.05944	3.00988	-1.45183	0.23627	-0.575396	-1.29147	-1.57603	-1.10577	2.20483	-1.65392	1.47333	-1.63472	1.02527	-1.4824	-1.45027	-1.61629	1.66883	-0.7093	-0.288387	-0.884943	3.86757	-0.0706065	3.38779	0.344304	-1.14451
hsa-miR-324-5p	-1.16201	1.189	-3.81445	0.000175256	0.000361525	-0.663255	DOWN	-1.64092	1.9492	-0.405639	4.98635	4.48579	4.45388	3.31154	4.97456	-0.361248	3.65928	-1.08331	2.80384	2.35314	2.70993	3.91125	-1.15718	4.10662	4.16637	-1.63592	3.94484	4.31856	3.9962	-1.29147	-1.57603	-1.66137	4.41663	3.10945	-1.57398	-1.63472	-1.64422	-1.4824	-1.45027	0.326991	1.72357	3.54362	0.19303	-0.884943	4.03246	1.58973	-1.50963	-1.60817	4.17379
hsa-miR-325	1.12429	0.13587	4.39722	1.67412e-05	3.88961e-05	1.57107	UP	-1.64092	-1.56057	-1.63331	-1.6019	-0.753	-1.33043	-1.63632	-1.62016	-0.361248	-1.49655	-1.08331	-1.53249	0.337852	-1.37441	3.67999	2.91739	-1.12207	0.0834609	1.91512	-1.45183	-1.63778	-1.67642	-1.29147	-1.57603	-1.06441	-1.62534	-1.65392	-1.57398	-0.103561	3.95618	-1.4824	-1.45027	-1.61629	4.91039	-0.7093	-0.117648	4.435	-1.66156	1.64926	-1.50963	-1.60817	-1.14451
hsa-miR-326	1.70393	3.50736	7.21793	7.56416e-12	3.47708e-11	15.8055	UP	2.12962	3.79798	-1.63331	-1.6019	4.92252	3.3373	4.57589	4.75455	-0.361248	4.18812	-1.08331	2.39614	4.35862	5.30684	-0.79222	3.12659	-1.12207	4.88679	4.50768	2.81717	4.93023	4.67281	3.05715	4.34023	4.41663	4.29952	3.02962	3.97554	3.59254	4.67828	4.61993	-1.45027	3.0386	-1.41896	-0.7093	3.78421	4.62652	4.24049	-1.66329	4.81535	4.40978	-1.14451
hsa-miR-329-5p	1.26647	0.110148	4.73683	3.79309e-06	9.48273e-06	2.9966	UP	-1.64092	-1.56057	-0.386083	-1.6019	-0.753	-1.33043	-1.63632	-1.62016	-0.361248	4.38408	-1.08331	0.926826	-1.59132	-1.37441	-0.79222	-1.15718	-1.12207	-1.25877	-1.63592	-1.45183	-1.63778	1.18465	-1.29147	-1.57603	3.41286	2.95071	-1.65392	-1.57398	-1.63472	-1.64422	3.83797	-1.45027	2.64585	-1.41896	-0.7093	-1.66395	-0.884943	-1.66156	-0.935604	-1.50963	4.15517	-1.14451
hsa-miR-330-5p	2.54241	1.86266	8.97013	1.04538e-16	7.51093e-16	26.8527	UP	5.43176	-1.56057	4.93596	-1.6019	-0.753	2.66273	1.00076	-1.62016	-0.361248	-1.49655	-1.08331	0.867178	2.62847	4.53782	4.69289	5.22388	6.19228	-1.26763	-0.0858261	2.30895	2.38649	-1.67642	-1.29147	2.70756	-0.454004	-1.62534	-1.65392	-1.57398	4.25383	-1.64422	-1.4824	-1.45027	-1.61629	-1.41896	4.15517	-1.66395	-0.884943	-1.03124	4.30568	-1.50963	3.83347	2.71882
hsa-miR-331-5p	-1.2494	-0.44619	-5.34108	2.21108e-07	6.33678e-07	5.74485	DOWN	-1.64092	-1.56057	-0.414222	-1.6019	3.78421	-1.33043	2.58	-1.62016	-0.361248	-1.49655	2.67202	1.01268	2.05673	2.26683	-0.79222	-1.15718	2.59223	-1.41449	4.38611	-1.45183	3.4623	-1.67642	-1.29147	4.3701	-1.66137	3.47604	-1.65392	-1.57398	-1.63472	-1.64422	-1.4824	-1.45027	3.20708	-1.41896	-0.7093	-1.66395	-0.884943	-1.66156	-1.66329	-1.50963	-1.60817	-1.14451
hsa-miR-337-3p	1.23446	0.654116	4.84546	2.31827e-06	5.92266e-06	3.47105	UP	-0.499252	-1.56057	-1.63331	-1.6019	-0.753	-1.33043	-1.63632	-1.62016	-0.361248	3.37149	-1.08331	2.33698	1.91952	3.48503	5.0314	2.85084	-1.12207	-1.67499	2.04253	-1.45183	3.91525	-1.22398	-1.29147	-1.57603	-0.354461	1.43015	-1.65392	1.58722	2.71641	0.619265	-1.4824	-1.45027	-1.61629	-1.41896	5.78948	2.04004	-0.884943	1.30743	-0.948035	-1.50963	-1.60817	-1.14451
hsa-miR-339-3p	-1.53244	-0.0118221	-6.20227	2.54697e-09	9.27981e-09	10.0952	DOWN	-1.64092	-1.56057	3.00556	-1.6019	4.68938	-1.33043	3.3901	0.452726	-0.361248	1.23723	3.84496	2.10772	0.302309	3.93389	3.84496	-1.15718	5.14283	3.25058	-0.0677913	-1.45183	2.66741	2.23493	-1.29147	2.25116	-1.66137	-1.62534	3.14218	-1.57398	2.87754	-0.7469	-1.4824	-1.45027	3.01747	-1.41896	-0.7093	-1.66395	-0.884943	0.316983	-0.0587957	-1.50963	0.976035	3.23165
hsa-miR-33a-5p	-1.04438	0.616818	-3.5465	0.000472683	0.000912074	-1.59688	DOWN	2.35773	1.80887	2.76448	2.63887	-0.753	-1.33043	-1.63632	-1.62016	-0.361248	4.32749	-1.08331	5.0818	5.07022	3.06136	-0.79222	2.47091	3.71506	-0.216552	-1.63592	-1.45183	2.3185	2.65092	-1.29147	2.01421	2.03756	-1.62534	0.886648	-1.57398	-0.0530304	-1.64422	-1.4824	2.09333	10.3025	4.22873	6.26966	-1.66395	-0.884943	2.66741	-1.66329	2.09829	-1.60817	4.75455
hsa-miR-33b-5p	-1.13176	0.0896896	-4.05779	6.78276e-05	0.000147065	0.236327	DOWN	-1.64092	4.46162	0.131809	5.87065	-0.753	3.84144	-1.63632	-1.62016	-0.361248	-1.49655	-1.08331	6.26125	3.00988	-1.37441	-0.79222	-1.15718	5.42924	0.28163	-1.63592	-1.45183	1.88982	-1.58648	-1.29147	1.47333	3.42855	-1.62534	1.75225	0.722352	-1.63472	-1.64422	-1.4824	3.13509	-1.61629	-1.41896	4.93023	-1.66395	-0.884943	1.89658	0.764248	-1.50963	-1.60817	4.4391
hsa-miR-342-5p	-1.5192	5.7513	-12.8881	5.45402e-29	8.27785e-28	54.9406	DOWN	6.57914	7.4534	6.87665	7.70433	5.87065	5.69069	6.04693	6.5367	6.56139	6.04693	7.1997	7.06565	7.01953	5.96559	6.5013	6.58783	7.62351	6.85468	7.29077	6.99927	6.22219	6.41283	6.41283	6.87665	6.42195	6.91372	6.86541	7.10043	7.30297	7.22434	6.78104	6.954	7.60428	5.81185	6.06192	6.46485	6.53196	6.15511	5.93531	7.1997	5.36518	5.88878
hsa-miR-345-5p	1.48143	1.73566	5.62255	5.4112e-08	1.66424e-07	7.11296	UP	-1.64092	4.14363	-1.63331	2.65845	4.05801	-1.33043	-1.63632	3.69559	-0.361248	-1.49655	-1.08331	-1.53249	3.85207	3.29647	4.22473	4.47494	-1.12207	0.584713	0.786813	4.63618	-0.117648	2.09581	4.03968	-1.57603	-0.771522	3.86417	3.17748	0.857109	0.18577	-1.64422	-1.4824	1.80332	-1.61629	4.61624	4.22473	4.2137	4.99997	-0.920035	3.34105	4.15331	1.54065	-1.14451
hsa-miR-34c-3p	2.13673	1.19255	8.217	1.49911e-14	8.83958e-14	21.9422	UP	-0.657337	1.62802	2.57502	2.84269	4.56371	-1.33043	-1.63632	3.85207	-0.361248	-1.49655	-1.08331	-1.53249	2.77184	-1.37441	-0.79222	-1.15718	-1.12207	-1.67499	-1.63592	-1.45183	-1.63778	1.51353	-1.29147	-1.57603	3.33033	-1.62534	1.5485	-1.57398	0.731387	-1.64422	-1.4824	-1.45027	-1.61629	-1.41896	-0.7093	-1.66395	-0.884943	1.06068	0.65172	-1.50963	0.275613	-1.14451
hsa-miR-3591-3p	2.21185	0.745821	8.77661	3.82064e-16	2.59258e-15	25.5701	UP	2.81257	-1.56057	-1.63331	-1.6019	-0.753	-1.33043	0.131809	-1.62016	-0.361248	-1.49655	-1.08331	-1.53249	1.44863	-1.37441	-0.79222	-1.15718	-1.12207	-1.36828	3.66736	4.10893	-1.63778	2.88213	3.46708	-1.57603	-1.66137	1.43546	-1.65392	-1.57398	0.262087	-0.495635	-1.4824	-1.45027	2.25116	4.76406	-0.7093	-1.66395	-0.884943	0.372383	2.79452	-1.50963	-1.60817	-1.14451
hsa-miR-3605-3p	2.86941	2.49595	11.4439	2.59082e-24	3.00699e-23	44.2296	UP	1.4012	5.16716	-1.63331	-1.6019	-0.753	-1.33043	1.79793	-1.62016	-0.361248	-1.49655	-1.08331	-1.53249	2.81042	4.82126	-0.79222	-1.15718	-1.12207	1.93491	3.1445	1.71947	2.09829	3.95435	2.89189	1.4449	3.46708	3.9303	3.34105	2.3185	4.0921	2.76633	1.97404	2.18873	3.4623	-1.41896	-0.7093	3.70918	-0.884943	4.85963	1.21911	-1.50963	-1.60817	-1.14451
hsa-miR-3606-5p	-1.12969	-0.821134	-5.47826	1.1206e-07	3.33062e-07	6.40491	DOWN	-1.64092	-1.56057	-0.288387	-1.6019	-0.753	3.54362	3.12419	0.471187	-0.361248	-1.49655	-1.08331	4.24421	-1.59132	9.25687	-0.79222	-1.15718	-1.12207	-1.02635	-1.63592	-1.45183	-1.63778	1.6711	-1.29147	-1.57603	-1.66137	2.89601	-0.520574	-1.57398	0.241948	-1.64422	-1.4824	-1.45027	2.87528	-1.41896	-0.7093	-1.66395	-0.884943	2.21867	2.22817	-1.50963	-1.60817	5.9113
hsa-miR-3607-5p	-1.56647	-0.611003	-7.0219	2.42724e-11	1.07158e-10	14.6588	DOWN	-1.64092	-1.56057	-1.63331	0.3215	-0.753	-1.33043	-0.526717	2.70993	-0.361248	-1.49655	-1.08331	3.41286	3.30161	-1.37441	-0.79222	-1.15718	-1.12207	3.25896	2.86215	-1.45183	2.93589	0.530152	2.72349	-1.57603	-1.66137	-1.62534	-1.65392	-1.57398	-1.63472	-1.64422	-1.4824	-1.45027	-1.61629	-1.41896	-0.7093	-1.66395	-0.884943	-1.66156	-1.66329	-1.50963	-1.60817	5.53804
hsa-miR-3615	1.48409	2.16382	5.77886	2.42249e-08	7.81596e-08	7.89577	UP	3.1706	-1.56057	2.53638	1.77976	3.87279	-1.33043	-1.63632	-1.62016	-0.361248	5.38365	-1.08331	2.36632	2.36315	2.85817	-0.79222	5.51554	4.00964	-1.67499	2.82176	1.97666	1.06385	3.77044	3.5188	4.61624	2.91553	3.65363	5.05061	2.47993	3.80361	-1.64422	-1.4824	3.45834	4.77721	-1.41896	-0.7093	-1.01627	4.62289	-0.685709	4.65996	-1.50963	2.71882	-1.14451
hsa-miR-3617-3p	1.09727	2.19767	3.78161	0.00019852	0.000405739	-0.780939	UP	3.78836	2.63631	-1.63331	6.84282	-0.753	-1.33043	3.84496	2.6084	-0.361248	1.91952	2.9428	2.9577	4.1397	-1.37441	3.44962	-1.15718	-1.12207	4.19177	2.05373	4.344	-1.63778	3.09419	-1.29147	1.93717	2.35547	-1.62534	2.47091	-1.57398	0.144357	-1.64422	-1.4824	-1.45027	2.2835	5.00389	-0.7093	-1.66395	-0.884943	4.15899	1.517	4.26017	-1.60817	3.76407
hsa-miR-3617-5p	-1.50888	0.30565	-5.17671	4.91029e-07	1.34417e-06	4.97127	DOWN	-0.67113	6.15511	4.12405	0.369626	-0.753	-1.33043	3.59039	4.45211	-0.361248	-1.49655	-1.08331	-1.53249	4.1203	3.11312	-0.79222	-1.15718	-1.12207	-0.281507	3.62031	4.24421	2.79935	3.69758	-1.29147	3.87816	-0.317965	-1.62534	5.14877	3.21711	2.97749	3.59039	3.76407	3.57981	4.81535	-1.41896	-0.7093	4.1848	-0.884943	4.66539	-0.176439	1.87381	-1.60817	-1.14451
hsa-miR-362-3p	-1.51366	0.616905	-5.21241	4.13544e-07	1.14799e-06	5.13766	DOWN	-1.64092	3.14218	-1.63331	4.03246	-0.753	-1.33043	3.44962	3.73966	-0.361248	2.27166	2.68237	3.00098	-1.59132	3.65928	-0.79222	-1.15718	-1.12207	1.59224	5.38841	3.11725	0.606589	2.20206	-1.29147	2.28895	-1.66137	-1.62534	-1.65392	-1.57398	-1.63472	0.0766217	-1.4824	-1.45027	4.50381	-1.41896	3.93389	-0.609248	-0.884943	-1.66156	-0.869215	-1.50963	3.36525	4.36449
hsa-miR-3620-5p	1.1454	7.82159	20.9816	2.11824e-55	1.69791e-53	115.538	UP	7.64764	6.98822	6.68167	6.97687	7.58504	7.35223	7.8189	7.39062	6.92964	7.04373	7.59813	7.27766	7.40263	7.36533	7.12574	6.48333	6.39588	7.1997	6.73982	7.49237	7.23627	7.68892	7.53124	7.44033	7.12574	6.9407	6.8879	7.44033	7.03812	6.954	7.4793	6.5971	7.42691	7.70433	7.37779	6.9407	7.11318	7.4203	7.68892	7.08956	7.32884	7.58504
hsa-miR-3622a-3p	1.04055	3.96073	5.34212	2.19978e-07	6.31146e-07	5.74982	UP	5.09332	2.68672	0.670685	2.48996	-0.753	3.28883	4.49817	4.91455	-0.361248	4.64901	5.32442	3.61566	2.46918	-1.37441	3.33918	2.75824	-1.12207	1.90742	4.82315	4.52803	3.58824	4.30745	4.10662	4.61993	3.97192	2.88802	1.78763	4.09973	2.65092	4.31472	4.98038	4.22473	4.83999	4.7827	4.96895	3.81843	4.67828	4.67468	4.04306	3.05715	2.83653	5.13694
hsa-miR-363-5p	1.18318	0.498119	4.65187	5.54238e-06	1.36096e-05	2.6317	UP	-1.64092	-1.56057	1.11479	-1.6019	-0.753	-1.33043	-1.63632	-1.62016	-0.361248	1.93717	-1.08331	-1.53249	2.75616	-1.37441	-0.79222	-1.15718	-1.12207	-1.67499	1.26318	1.44116	-1.63778	-0.660357	-1.29147	-1.57603	2.48483	-1.62534	-1.65392	2.04744	3.03438	-1.64422	-1.4824	3.78204	-1.61629	2.3751	-0.7093	4.3701	3.65176	0.518087	-1.66329	1.85002	-1.60817	-1.14451
hsa-miR-3646	1.0733	4.44982	5.61755	5.55063e-08	1.70304e-07	7.08819	UP	6.34335	4.06339	3.37506	1.16472	4.11309	3.93389	3.94298	4.7678	5.62992	4.72407	-1.08331	2.47993	4.9728	5.59259	4.58883	-1.15718	4.54315	5.2662	3.15756	4.09973	4.00761	4.15145	4.3112	4.83805	3.82233	3.44962	4.56	4.56865	4.96071	4.86578	4.48744	5.37447	1.90073	4.47494	4.52252	3.41764	5.26427	3.30675	5.95868	5.16716	5.40013	5.2542
hsa-miR-3648	-1.09643	12.782	-14.2051	2.50969e-33	4.76842e-32	64.8834	DOWN	13.7162	13.5856	13.5856	13.5856	13.5856	13.8846	13.7162	13.7162	14.1961	13.5856	13.3915	13.4839	13.1669	13.5856	13.1669	13.3915	13.4839	13.5856	13.3915	13.4839	13.3915	13.3915	13.2276	13.5856	13.7162	13.5856	13.7162	13.4839	13.5856	13.4839	13.2276	13.2276	13.7162	13.4839	13.5856	13.5856	13.4839	13.8846	13.4839	13.5856	13.0632	13.7162
hsa-miR-3649	2.77735	1.87247	10.0911	4.53325e-20	3.96852e-19	34.527	UP	1.14168	-1.56057	1.52047	2.53088	-0.753	3.06573	-1.63632	0.335133	-0.361248	4.05975	-1.08331	2.18335	-1.59132	1.93491	-0.79222	-1.15718	-1.12207	2.40512	0.757757	2.03519	3.31979	1.28821	4.08783	1.80332	-0.627309	-1.62534	-1.65392	1.23723	3.16633	-0.495635	1.35636	2.48753	-1.61629	-1.41896	3.64725	-0.906191	4.88679	3.00098	4.09973	-1.50963	1.22297	-1.14451
hsa-miR-3650	2.48933	0.955917	9.81957	3.05946e-19	2.53146e-18	32.633	UP	4.82126	4.45211	-1.63331	-1.6019	-0.753	-1.33043	-0.110383	4.1185	-0.361248	-1.49655	-1.08331	-1.53249	1.09418	-1.37441	-0.79222	4.38813	-1.12207	-1.67499	-0.0272174	-1.45183	-1.63778	-1.12927	-1.29147	-1.57603	-0.1693	-1.62534	-1.65392	-1.57398	1.47023	-1.64422	-1.4824	2.80384	3.30161	-1.41896	-0.7093	-0.656109	4.49081	1.8407	2.29345	-1.50963	-1.60817	-1.14451
hsa-miR-3653-5p	2.12077	0.795446	7.81828	1.8961e-13	1.01534e-12	19.4373	UP	-1.64092	0.7507	0.352935	3.58621	-0.753	-1.33043	1.19403	-1.62016	-0.361248	-1.49655	-1.08331	1.42511	-1.59132	-1.37441	-0.79222	-1.15718	2.95071	-1.67499	-1.63592	-1.45183	-1.63778	-1.51354	-1.29147	-1.57603	2.72795	0.615457	-0.592991	-1.57398	-1.63472	-1.64422	-1.4824	-1.45027	4.18132	-1.41896	-0.7093	-0.950146	-0.884943	-1.11748	-1.66329	-1.50963	1.91243	-1.14451
hsa-miR-3654	1.35938	1.41308	4.68004	4.89034e-06	1.21096e-05	2.75208	UP	-1.64092	4.37579	4.4391	-1.6019	-0.753	2.12477	0.101917	0.0537957	-0.361248	-1.49655	-1.08331	1.46713	-1.59132	7.79728	-0.79222	-1.15718	-1.12207	4.7408	-1.63592	1.8549	-1.63778	-0.781857	-1.29147	-1.57603	0.262087	1.88488	1.44863	1.17818	3.81548	0.244528	4.63795	-1.45027	-1.61629	-1.41896	4.96502	4.97632	-0.884943	2.75019	1.15355	1.93491	2.88996	3.06136
hsa-miR-3658	-1.17523	-0.848156	-6.17694	2.92312e-09	1.06352e-08	9.96054	DOWN	-1.64092	-1.56057	-1.63331	-1.6019	-0.753	-1.33043	-1.63632	-1.62016	-0.361248	-1.49655	-1.08331	-1.53249	-1.59132	-1.37441	-0.79222	-1.15718	2.99194	-1.67499	1.01877	1.86447	0.452726	-1.67642	-1.29147	3.73966	-1.66137	-1.62534	-1.65392	-1.57398	-1.63472	1.21178	-1.4824	-1.45027	2.18335	-1.41896	-0.7093	-0.281507	-0.884943	-1.66156	-1.66329	-1.50963	-1.60817	-1.14451
hsa-miR-365a-3p	1.17169	2.775	4.29935	2.52824e-05	5.73381e-05	1.17683	UP	-0.597648	2.33266	-1.63331	1.82703	4.60848	3.79798	4.01677	2.49239	4.91455	4.45584	-1.08331	2.94675	5.33351	4.1397	5.30057	-1.15718	3.2753	3.36322	3.11312	2.49239	1.92998	3.00098	3.62793	3.63781	3.67174	2.35998	2.20953	3.62031	3.90166	-0.398935	4.36828	-1.45027	3.94113	3.89621	-0.7093	6.85468	-0.884943	-0.910165	3.09649	-1.50963	4.38611	-1.14451
hsa-miR-365b-5p	-1.09979	2.93094	-4.24116	3.21966e-05	7.20003e-05	0.945986	DOWN	1.30743	2.67202	5.06672	-1.6019	-0.753	4.37763	4.64901	4.60848	-0.361248	4.82505	-1.08331	2.01421	-1.59132	5.20672	-0.79222	5.77261	-1.12207	4.58149	4.88501	4.38813	4.26405	4.70927	4.61993	5.07637	2.25567	4.9902	5.09793	3.15953	4.82126	5.23024	4.5019	5.33566	5.14283	3.71929	-0.7093	4.86171	5.46811	4.52434	2.44836	3.99436	2.7052	-1.14451
hsa-miR-3661	-1.05514	-0.161664	-4.61531	6.51458e-06	1.58388e-05	2.47635	DOWN	-1.64092	-1.56057	0.271187	-1.6019	-0.753	-1.33043	-1.63632	4.11309	-0.361248	3.12864	3.39876	0.91977	-1.59132	-1.37441	-0.79222	-1.15718	2.86215	3.71929	-1.63592	-1.45183	1.09418	-0.810078	3.27163	0.433474	2.15747	-1.62534	1.2698	-1.57398	4.54315	1.88247	3.22547	-1.45027	0.316983	-1.41896	-0.7093	2.35998	-0.884943	-1.66156	-0.847313	2.39393	1.23723	-1.14451
hsa-miR-3663-5p	2.1623	3.75085	9.72473	5.93228e-19	4.785e-18	31.9764	UP	3.56816	-1.56057	4.39909	5.19835	-0.753	3.12659	4.06529	4.39714	-0.361248	2.16242	-1.08331	-1.53249	4.57409	2.9451	-0.79222	-1.15718	4.19748	1.83204	3.79176	4.01862	3.7959	4.7827	4.90225	2.39614	3.2808	4.68003	4.90608	3.20708	4.70033	4.5019	2.42731	-1.45027	3.2772	3.50839	-0.7093	3.92628	3.75214	4.49633	4.98038	-1.50963	4.95312	-1.14451
hsa-miR-3664-3p	-1.04187	-0.793152	-5.348	2.13721e-07	6.15258e-07	5.77783	DOWN	4.61993	-1.56057	2.7302	-1.6019	-0.753	-1.33043	3.00098	-1.62016	-0.361248	-1.49655	3.50839	0.886648	-1.59132	-1.37441	-0.79222	-1.15718	-1.12207	-1.67499	2.23036	-1.45183	-0.424357	-1.67642	-1.29147	-1.57603	2.79693	-1.62534	1.75225	4.18812	-1.63472	-1.64422	-1.4824	-1.45027	-1.61629	-1.41896	-0.7093	-1.66395	-0.884943	-1.66156	2.00323	1.3739	-1.60817	-1.14451
hsa-miR-3666	1.22769	0.435471	4.6382	5.88821e-06	1.44115e-05	2.57351	UP	2.85313	-1.56057	-1.63331	-1.6019	-0.753	-1.33043	-1.63632	0.679657	4.59265	-1.49655	-1.08331	-1.53249	-1.59132	-1.37441	-0.79222	-1.15718	-1.12207	1.91732	0.880452	-1.45183	-1.63778	3.25896	-1.29147	-1.57603	-1.66137	-1.62534	-0.124609	-1.57398	-0.181974	-1.64422	-1.4824	-1.45027	-1.61629	-1.41896	-0.7093	4.38088	-0.884943	-1.66156	1.89658	1.18783	1.48842	-1.14451
hsa-miR-3667-3p	2.90228	1.03032	11.4976	1.74529e-24	2.05351e-23	44.6223	UP	-1.64092	-1.56057	-1.63331	-1.6019	4.26767	-1.33043	-1.63632	-1.62016	-0.361248	-1.49655	-1.08331	-1.53249	-1.59132	-1.37441	-0.79222	-1.15718	-1.12207	-1.67499	-1.63592	-1.45183	-1.63778	-1.67642	-1.29147	-1.57603	2.63887	-1.62534	-1.65392	-1.57398	3.46919	-1.64422	2.78484	3.8711	-1.61629	-1.41896	-0.7093	4.44298	-0.884943	2.37976	-0.462139	2.86016	2.32544	-1.14451
hsa-miR-367-3p	-1.83658	0.413188	-6.59389	2.88721e-10	1.14995e-09	12.2276	DOWN	-1.64092	4.76406	3.44543	5.2413	-0.753	2.64347	0.682498	3.6089	-0.361248	3.4623	-1.08331	1.47333	4.70208	-1.37441	-0.79222	-1.15718	-1.12207	1.68517	4.17945	2.9484	0.337852	-1.67642	2.67792	1.18783	2.57502	0.174035	4.23676	-1.57398	-1.63472	2.87086	-1.4824	3.24299	-1.61629	5.93222	6.63876	1.73913e-05	3.41764	3.85207	-1.66329	2.4432	-1.60817	3.48503
hsa-miR-3670	-1.49498	-0.460276	-6.51653	4.4694e-10	1.73434e-09	11.7992	DOWN	-0.339157	2.13374	0.831639	4.87536	-0.753	-1.33043	-0.153026	2.39171	-0.361248	-1.49655	3.47604	4.85404	-1.59132	-1.37441	-0.79222	-1.15718	-1.12207	-1.67499	0.867178	1.99605	3.55274	-1.41178	-1.29147	-1.57603	3.8601	-1.62534	-1.65392	-1.57398	0.153826	2.51893	-1.4824	1.53566	-1.61629	-1.41896	-0.7093	2.58937	-0.884943	2.59223	3.24884	-1.50963	-1.60817	-1.14451
hsa-miR-3675-3p	1.06821	4.50644	5.06355	8.41507e-07	2.25545e-06	4.44984	UP	4.23676	4.67648	5.08391	5.70775	4.40437	4.7908	4.66539	4.26405	5.2985	3.45387	-1.08331	2.66741	4.19177	2.79452	4.89677	6.26966	5.60577	4.3112	4.48196	5.21932	5.04128	4.80954	4.95715	5.36518	5.44855	4.75455	5.03943	5.00389	5.29597	4.78681	4.9728	4.32213	5.13343	4.36253	-0.7093	5.36518	-0.884943	2.32311	4.76047	4.47655	5.62214	3.32441
hsa-miR-3677-5p	-1.25492	1.01948	-4.42751	1.47153e-05	3.44385e-05	1.69458	DOWN	-1.64092	2.24219	4.54526	-1.6019	4.49254	2.43923	2.68672	-1.62016	5.21932	2.42921	-1.08331	4.22873	2.74067	2.99727	-0.79222	2.79216	3.71506	4.04306	0.187835	1.73508	-1.63778	1.43546	-1.29147	1.03556	1.6249	3.71098	3.83167	4.00557	0.297787	-1.64422	-1.4824	-1.45027	3.1445	-1.41896	3.83347	3.90356	-0.884943	1.83473	4.05801	1.98883	-1.60817	-1.14451
hsa-miR-3678-3p	1.84353	2.17412	6.41332	7.96447e-10	3.01311e-09	11.2331	UP	4.66352	-1.56057	3.1554	-1.6019	-0.753	2.96661	-1.63632	-1.62016	-0.361248	4.02437	-1.08331	-1.53249	0.591513	5.00389	-0.79222	-1.15718	5.12913	3.9303	0.198104	3.78836	3.21483	3.16847	-1.29147	4.1274	5.37447	2.15747	2.26082	-1.57398	1.517	4.22114	4.29573	2.4432	3.65176	3.4806	4.57035	1.78763	-0.884943	4.61993	4.3701	-1.50963	-1.60817	2.80826
hsa-miR-3679-5p	1.02702	7.4525	13.1072	1.04368e-29	1.69432e-28	56.5864	UP	5.9384	6.02673	4.91455	5.03745	6.86541	7.79728	6.20723	7.1997	7.19362	7.17558	6.67121	5.2149	7.12574	6.67121	6.70994	6.21847	5.2775	7.29077	6.33954	6.82289	7.17558	6.52722	6.44735	7.13781	7.42691	7.37779	7.868	7.1997	7.27766	7.41369	7.13781	7.03251	6.87665	6.92964	7.88185	7.13781	7.61042	7.95389	6.87665	5.57283	6.56139	7.37779
hsa-miR-3683	-1.14339	-0.883042	-6.24743	1.99038e-09	7.32473e-09	10.3365	DOWN	-1.64092	-1.56057	-1.63331	0.314346	-0.753	-1.33043	-1.63632	-1.62016	-0.361248	3.5317	4.71292	2.58325	-1.59132	-1.37441	-0.79222	-1.15718	-1.12207	2.27458	-1.63592	-1.45183	-0.254783	0.399839	-1.29147	-1.57603	-1.66137	1.77686	-0.388713	-1.57398	-1.63472	-1.64422	-1.4824	2.40219	-1.61629	-1.41896	-0.7093	-1.66395	-0.884943	-1.66156	1.87167	-1.50963	-1.60817	2.62325
hsa-miR-3685	1.15196	0.478694	4.37949	1.80489e-05	4.17828e-05	1.49909	UP	-1.64092	-1.56057	0.264561	-1.6019	-0.753	-1.33043	4.1848	1.39101	-0.361248	-1.49655	-1.08331	2.06614	-1.59132	-1.37441	-0.79222	-1.15718	-1.12207	-1.67499	-1.63592	-1.45183	3.63148	-1.61205	2.70756	-1.57603	-1.66137	-1.62534	-1.65392	-1.57398	-1.63472	-1.64422	-1.4824	-1.45027	1.43831	-1.41896	-0.7093	1.33735	-0.884943	4.40978	1.28821	-1.50963	0.536643	-1.14451
hsa-miR-3688-5p	-3.08966	0.787957	-11.034	5.20313e-23	5.60757e-22	41.2485	DOWN	-1.64092	5.18987	2.39171	3.80973	-0.753	5.30265	6.26125	2.63375	-0.361248	3.06136	6.84282	5.67689	4.7317	4.04706	-0.79222	-1.15718	5.18357	3.26986	4.53782	4.32584	4.97632	2.87086	4.04306	3.17748	4.47494	4.15145	1.41243	1.72863	1.85246	0.511374	3.02598	-1.45027	2.29651	-1.41896	-0.7093	1.51353	3.60072	-1.66156	2.28895	-1.50963	-1.60817	4.15331
hsa-miR-3689a-3p	1.06127	1.39109	3.84388	0.000156627	0.000325566	-0.557052	UP	4.23676	-1.56057	4.55825	-1.6019	-0.753	-1.33043	0.455752	2.72572	-0.361248	2.79935	-1.08331	2.5212	2.6937	2.67792	-0.79222	-1.15718	3.39876	3.95251	-1.63592	-1.45183	0.867178	3.41286	-1.29147	1.81372	-0.411	3.59859	-0.818426	4.65442	-0.22203	3.31545	1.29488	-1.45027	-1.61629	1.6787	3.61803	3.99804	-0.884943	0.4497	0.419678	-1.50963	1.40956	-1.14451
hsa-miR-3689d	1.49066	3.49547	5.82798	1.87591e-08	6.13739e-08	8.14506	UP	-0.411	5.71924	3.73966	5.22607	4.78681	2.43383	4.5565	5.0076	-0.361248	-1.49655	5.5409	3.34105	4.3701	5.38841	4.93422	-1.15718	6.06583	1.43015	5.17952	4.27126	2.13949	4.04706	3.86417	5.0076	4.48007	3.71718	3.45834	3.25896	4.36253	3.81357	3.92829	4.73713	2.98375	3.00098	4.88679	3.71506	5.12513	2.25567	5.17952	5.01773	4.18646	3.68952
hsa-miR-3692-5p	3.87987	1.65138	15.3535	3.95241e-37	9.2163e-36	73.6062	UP	-1.64092	0.764248	-1.63331	-1.6019	-0.753	-1.33043	-1.63632	-1.62016	-0.361248	-1.49655	-1.08331	2.14947	-1.59132	3.80007	-0.79222	-1.15718	-1.12207	3.6297	-1.63592	-1.45183	-0.631196	-0.391343	-1.29147	3.44125	2.74067	2.31599	1.79793	2.46679	3.43656	2.95536	3.44125	-1.45027	3.10067	-1.41896	-0.7093	-1.66395	-0.884943	-1.66156	-0.37187	-1.50963	-1.60817	-1.14451
hsa-miR-3713	3.61728	1.87274	14.4205	4.86246e-34	9.52077e-33	66.5181	UP	1.96697	-1.56057	-1.63331	-1.6019	4.00182	4.84213	-1.63632	1.84317	-0.361248	-1.49655	-1.08331	-1.53249	-1.59132	-1.37441	-0.79222	-1.15718	-1.12207	-1.67499	2.34264	2.80826	1.1749	0.88355	-1.29147	-1.57603	-1.66137	-1.62534	1.66324	1.17818	-1.63472	-1.64422	-1.4824	-1.45027	-1.61629	-1.41896	-0.7093	3.76843	-0.884943	-0.0631	0.269111	-1.50963	-1.60817	-1.14451
hsa-miR-3714	-1.72071	3.14775	-6.58292	3.07235e-10	1.2199e-09	12.1667	DOWN	3.1957	5.5109	4.52252	3.18161	3.94846	5.19835	4.87946	5.13891	4.18132	4.3701	-1.08331	-1.53249	5.51554	4.5489	3.2945	4.15331	-1.12207	5.5781	3.93754	5.5781	5.05061	5.42027	5.59259	5.10149	5.77878	5.68502	5.24779	4.8716	4.80192	5.27092	4.72599	5.53037	5.08789	2.9405	-0.7093	4.67093	3.62031	2.08485	3.5639	5.04873	5.11327	-1.14451
hsa-miR-371b-3p	1.32268	3.84824	5.80295	2.13742e-08	6.92232e-08	8.01781	UP	3.73358	4.29573	3.1957	-1.6019	4.1397	5.14478	5.00389	4.32914	-0.361248	3.96013	-1.08331	4.30392	1.41789	3.35015	5.05512	3.77986	-1.12207	3.73966	3.45834	4.58323	4.42607	4.8286	4.99404	5.09332	1.43015	5.50371	3.79383	4.16242	4.92835	4.62652	4.73713	4.20627	4.60103	4.86379	-0.7093	4.04306	-0.884943	4.91886	4.5186	3.26432	4.48579	3.72335
hsa-miR-373-3p	1.03412	0.13021	4.12649	5.14582e-05	0.000112716	0.49905	UP	2.05373	-1.56057	-0.354461	-1.6019	-0.753	-1.33043	-1.63632	1.43546	-0.361248	-1.49655	-1.08331	4.32584	4.19748	1.91512	-0.79222	-1.15718	-1.12207	4.74857	-1.63592	-1.45183	2.04253	-0.703459	-1.29147	-1.57603	-1.66137	-1.62534	-1.65392	-1.57398	-1.63472	-1.64422	-1.4824	-1.45027	-1.61629	-1.41896	-0.7093	-1.054	-0.884943	-1.66156	-0.971254	4.5869	-1.60817	-1.14451
hsa-miR-374a-3p	-1.37179	-0.120766	-5.36297	1.98547e-07	5.74154e-07	5.84931	DOWN	1.06068	-1.56057	3.66108	2.8016	4.15899	-1.33043	2.26683	3.9303	-0.361248	-1.49655	-1.08331	4.41854	4.30745	-1.37441	4.13629	-1.15718	-1.12207	-1.67499	0.286152	-1.45183	-1.63778	-1.67642	-1.29147	-1.57603	-1.66137	-1.62534	-0.87113	3.65928	-1.63472	-1.64422	-1.4824	-1.45027	-1.61629	4.45388	-0.7093	-1.66395	-0.884943	0.744213	4.00182	4.13629	1.57093	5.70189
hsa-miR-376b-3p	-1.47	0.219661	-5.18568	4.7032e-07	1.293e-06	5.01301	DOWN	-0.462139	3.32812	2.58325	2.84856	-0.753	4.25593	3.37149	3.84871	-0.361248	-1.49655	-1.08331	-1.53249	3.7282	-1.37441	-0.79222	4.20255	-1.12207	2.71882	-0.216552	-1.45183	0.754228	-1.67642	-1.29147	2.16924	-1.66137	1.99605	1.19742	-1.57398	2.15227	-1.64422	-1.4824	-1.45027	-1.61629	-1.41896	-0.7093	-1.66395	-0.884943	0.962887	-1.66329	-1.50963	-1.60817	4.42771
hsa-miR-376c-3p	-1.52241	0.407542	-5.1706	5.05638e-07	1.38122e-06	4.94287	DOWN	-1.64092	1.65189	-1.63331	-1.6019	-0.753	-1.33043	0.706443	0.316983	-0.361248	1.65189	3.81167	3.83347	3.57552	-1.37441	-0.79222	6.78104	-1.12207	2.42541	-1.63592	-1.45183	0.786813	0.444374	-1.29147	-1.57603	-1.66137	-1.62534	-1.65392	-1.57398	-0.485496	-1.64422	-1.4824	2.13949	-1.61629	5.21062	6.78104	0.203074	-0.884943	3.76407	2.31599	-1.50963	0.969209	4.94538
hsa-miR-377-5p	-1.38709	0.180711	-5.4455	1.31954e-07	3.90382e-07	6.2461	DOWN	4.5299	-1.56057	5.03943	-1.6019	-0.753	-1.33043	-0.470678	0.326991	-0.361248	3.89441	3.4623	4.45388	0.67427	-1.37441	4.24421	-1.15718	-1.12207	1.62158	-1.63592	3.87816	1.37847	-1.67642	-1.29147	1.52724	-1.66137	1.98633	2.50351	7.9113	0.455752	2.07064	-1.4824	1.77187	-1.61629	4.14363	-0.7093	2.82397	-0.884943	2.25116	2.66273	3.60464	-1.60817	5.00575
hsa-miR-378a-3p	2.52173	1.03626	10.4629	3.21762e-21	3.01212e-20	37.1524	UP	0.460726	-1.56057	1.2698	-1.6019	-0.753	-1.33043	1.14168	-1.62016	-0.361248	1.83771	-1.08331	-1.53249	-1.59132	-1.37441	-0.79222	-1.15718	-1.12207	-1.67499	0.578639	-1.45183	-1.63778	1.6364	-1.29147	3.51473	0.979689	-0.283539	2.9428	3.85207	1.16773	-0.35723	-1.4824	-1.45027	0.985915	-1.41896	-0.7093	-1.66395	-0.884943	2.36632	1.10068	-1.50963	-1.60817	-1.14451
hsa-miR-378a-5p	1.16582	1.27509	4.09269	5.8975e-05	0.000128304	0.369307	UP	2.68237	3.87447	-1.63331	-1.6019	-0.753	-1.33043	1.25987	2.72572	-0.361248	2.40806	-1.08331	-1.53249	-1.59132	3.68392	-0.79222	2.97524	-1.12207	3.12864	2.08149	1.9492	1.7261	0.873235	-1.29147	-1.57603	-1.66137	-1.62534	-1.65392	2.52847	2.03283	-1.64422	-1.4824	2.18335	-1.61629	2.30408	-0.7093	6.69116	-0.884943	-1.66156	-0.092	1.70991	2.60045	-1.14451
hsa-miR-378c	1.00068	0.744988	3.56274	0.000445817	0.000864992	-1.54204	UP	3.71506	-1.56057	1.65189	-1.6019	-0.753	3.06136	-1.63632	6.79086	-0.361248	2.14947	-1.08331	-1.53249	2.92981	2.10296	-0.79222	-1.15718	-1.12207	2.40512	2.00799	-1.45183	0.934913	-1.02798	-1.29147	-1.57603	3.57026	-1.62534	-0.758561	1.57943	3.97554	-1.64422	-1.4824	-1.45027	-1.61629	-1.41896	-0.7093	2.6084	3.10285	4.35456	3.79798	-1.50963	2.43653	-1.14451
hsa-miR-378e	1.43221	0.229375	6.03087	6.42247e-09	2.23523e-08	9.19121	UP	1.1749	-1.56057	-1.63331	-1.6019	-0.753	-1.33043	-1.63632	-1.62016	-0.361248	1.87797	-1.08331	0.99473	-1.59132	-1.37441	-0.79222	-1.15718	-1.12207	-1.67499	-1.63592	-1.45183	0.679657	-1.67642	-1.29147	-1.57603	2.17882	-1.62534	-1.65392	-1.57398	-1.63472	0.465687	-1.4824	-1.45027	0.67427	1.80887	-0.7093	-1.66395	-0.884943	-1.66156	3.20369	-1.50963	1.31018	-1.14451
hsa-miR-378f	1.83413	1.44684	5.9449	1.01459e-08	3.46068e-08	8.7447	UP	4.03246	-1.56057	0.923298	-1.6019	-0.753	-1.33043	1.89658	2.45891	-0.361248	-1.49655	4.97835	-1.53249	-1.59132	2.85313	-0.79222	-1.15718	-1.12207	-1.42901	2.40219	-1.45183	-1.63778	-1.67642	-1.29147	-1.57603	2.2775	-0.232639	2.77628	-1.57398	-1.63472	-1.64422	-1.4824	-1.45027	-1.61629	3.77612	-0.7093	-1.66395	-0.884943	-0.29677	10.6642	-1.50963	2.76448	4.8286
hsa-miR-378g	1.30327	-0.396181	6.51144	4.5992e-10	1.77665e-09	11.7712	UP	-1.64092	-1.56057	-1.63331	-1.6019	-0.753	-1.33043	-1.63632	-1.62016	-0.361248	-1.49655	-1.08331	-1.53249	-1.59132	2.99194	-0.79222	-1.15718	-1.12207	-1.67499	-1.63592	-1.45183	-1.63778	-1.67642	2.31347	-1.57603	-1.66137	0.99473	-1.65392	-1.57398	-1.63472	1.25053	-1.4824	-1.45027	-1.61629	-1.41896	-0.7093	-1.66395	-0.884943	-1.66156	-1.17649	-1.50963	-1.60817	-1.14451
hsa-miR-379-5p	-2.63384	0.85392	-8.94691	1.22208e-16	8.70734e-16	26.6981	DOWN	1.99821	4.85607	0.22193	7.16926	5.39071	-1.33043	2.04744	4.5339	-0.361248	4.01677	-1.08331	-1.53249	4.62141	3.23967	3.5486	-1.15718	2.66741	5.2149	0.940876	1.61497	4.87536	2.70304	-1.29147	3.08982	-0.71163	4.56694	2.03073	-1.57398	-1.63472	3.32441	-1.4824	-1.45027	1.49731	4.28183	5.83636	-0.0858261	5.13343	4.15517	2.05373	-1.50963	2.96661	4.41309
hsa-miR-380-5p	-1.03692	0.51579	-3.58378	0.000413131	0.000804007	-1.47062	DOWN	-0.310426	1.73948	-1.63331	5.37447	-0.753	-1.33043	0.65533	4.01677	-0.361248	4.48744	-1.08331	-1.53249	3.78421	-1.37441	3.38417	-1.15718	-1.12207	4.61198	-1.63592	-1.45183	3.053	3.23165	-1.29147	-1.57603	-1.66137	2.61326	4.59074	-1.57398	-1.63472	-1.64422	1.70352	-1.45027	-1.61629	-1.41896	5.28468	2.9428	-0.884943	3.4032	-1.66329	-1.50963	-1.60817	5.54611
hsa-miR-3907	-1.76202	3.2917	-6.91089	4.65647e-11	2.004e-10	14.0186	DOWN	3.56816	5.42027	3.77244	3.04588	4.98447	4.63442	4.89502	5.58763	-0.361248	5.03547	5.56246	1.2698	6.08705	4.92835	6.02673	-1.15718	4.16242	4.1203	5.58256	5.48305	5.48081	5.75423	4.1683	5.89553	4.52617	5.8517	3.81548	4.65442	4.33301	5.26233	3.74788	4.29952	5.77878	-1.41896	-0.7093	3.11952	3.81843	4.92646	4.98447	-1.50963	2.64823	6.56139
hsa-miR-3909	-1.33197	0.16786	-4.99092	1.18364e-06	3.11707e-06	4.12001	DOWN	0.471187	3.2277	1.97404	3.31545	3.6089	-1.33043	2.06839	2.5088	-0.361248	-1.49655	-1.08331	2.62847	-1.59132	-1.37441	3.93389	-1.15718	3.81843	1.41516	-1.63592	-1.45183	-1.63778	-1.67642	-1.29147	-1.57603	-1.66137	-1.62534	2.06294	-1.57398	-1.63472	4.17379	-1.4824	3.11725	3.75415	-1.41896	-0.7093	-0.777104	-0.884943	1.3252	3.14218	2.70993	-1.60817	-1.14451
hsa-miR-3928-5p	1.54432	2.71768	5.52446	8.88919e-08	2.65743e-07	6.63006	UP	4.99997	-1.56057	2.04253	-1.6019	-0.753	3.07847	1.01877	-1.62016	-0.361248	-1.49655	3.81843	-1.53249	-1.59132	2.90838	3.35843	3.67999	4.63442	3.4713	-1.63592	4.5186	2.81257	1.94437	-1.29147	4.58497	4.82505	4.02863	2.14523	4.93023	4.67828	2.91553	3.87447	-1.45027	3.42404	3.10945	-0.7093	1.91512	-0.884943	4.44834	5.2413	-1.50963	3.86757	3.82233
hsa-miR-3934-5p	-1.82801	4.18794	-8.85164	2.31517e-16	1.59207e-15	26.0657	DOWN	4.02437	5.09332	4.57768	0.455752	6.14787	2.89601	5.42476	5.68502	6.45623	5.66864	5.4927	4.09591	5.3378	5.6032	5.52551	6.70052	7.39662	5.67957	5.81517	5.69069	5.80161	5.80161	6.12198	5.66864	6.09062	6.18432	6.18432	5.69069	4.49633	5.80852	5.3378	5.78394	6.52722	4.89853	4.38408	5.9208	5.40243	5.18562	2.77628	4.27467	5.19381	-1.14451
hsa-miR-3935	2.10773	1.15467	7.36244	3.16369e-12	1.50275e-11	16.6635	UP	0.38017	3.4623	-1.63331	-1.6019	-0.753	-1.33043	-1.63632	1.3739	-0.361248	-1.49655	-1.08331	-1.53249	2.13661	-1.37441	-0.79222	-1.15718	-1.12207	-1.0117	-1.63592	-1.45183	0.934913	1.49988	-1.29147	-1.57603	-1.66137	1.68285	2.30895	2.10296	-1.63472	2.33021	1.24733	-1.45027	-1.61629	-1.41896	-0.7093	4.01139	-0.884943	2.3185	-1.66329	1.29488	3.6916	-1.14451
hsa-miR-3936	-1.57271	1.23708	-5.42659	1.44958e-07	4.27677e-07	6.15479	DOWN	3.36322	3.14822	0.679657	-1.6019	-0.753	2.61796	1.4609	3.43656	-0.361248	3.26271	-1.08331	3.12659	3.86934	-1.37441	-0.79222	-1.15718	-1.12207	5.08975	2.48753	-1.45183	2.72349	3.80361	4.38408	2.9484	-1.66137	2.62325	5.21062	4.4578	3.34353	4.15145	2.11964	3.41286	3.96448	-1.41896	-0.7093	1.3879	-0.884943	2.714	4.06529	1.93943	-1.60817	-1.14451
hsa-miR-3939	-1.11343	-0.870582	-5.90731	1.23738e-08	4.15972e-08	8.55096	DOWN	-1.64092	-1.56057	0.344304	-1.6019	-0.753	-1.33043	1.31948	1.24412	-0.361248	2.23731	-1.08331	1.64663	-1.59132	-1.37441	-0.79222	-1.15718	-1.12207	-0.697391	0.997743	-1.45183	-1.63778	1.70352	-1.29147	-1.57603	2.10296	-1.62534	1.88022	-1.57398	-1.63472	-1.64422	-1.4824	-1.45027	-1.61629	-1.41896	-0.7093	2.9428	-0.884943	0.394524	-1.66329	-1.50963	-1.60817	-1.14451
hsa-miR-3940-3p	1.12023	4.02864	4.87039	2.06823e-06	5.305e-06	3.58113	UP	3.59647	4.26767	1.6607	2.66741	4.42245	5.45357	3.82233	4.81341	5.77878	4.55825	4.32749	3.45834	5.20251	4.18132	-0.79222	3.24299	-1.12207	5.20043	2.96003	5.19381	4.34212	5.16531	4.70383	5.01578	5.40013	4.55293	3.62031	5.21932	4.5489	4.61023	4.31664	3.4989	1.31294	4.95312	-0.7093	4.01677	-0.884943	4.7827	3.85039	3.60464	5.12913	-1.14451
hsa-miR-3940-5p	1.21159	11.4569	24.3853	8.4584e-66	1.20532e-63	139.394	UP	11.3691	10.7312	10.0911	10.2185	11.0203	10.9346	11.5034	10.7731	10.2185	10.2185	10.3849	10.5257	10.5613	11.1643	11.3691	10.4543	10.7731	10.7731	10.5613	11.1643	10.8153	11.5336	11.3691	10.8541	10.7731	10.5955	10.5257	10.7312	10.8938	10.9346	11.0708	10.9544	10.9346	11.4732	10.7731	10.6332	10.6332	10.6642	11.5826	10.5955	11.3187	10.8153
hsa-miR-3942-3p	-1.56557	0.025353	-5.81829	1.9732e-08	6.43383e-08	8.09576	DOWN	-1.64092	-1.56057	-1.63331	3.47832	-0.753	2.93589	3.0857	3.74582	-0.361248	3.75214	5.59523	3.2772	1.57707	-1.37441	-0.79222	2.74067	3.9245	1.06997	-0.176439	-1.45183	-1.63778	-1.39093	-1.29147	-1.57603	-0.566961	1.85002	2.77628	0.578639	4.01313	3.33918	-1.4824	-1.45027	1.43015	-1.41896	-0.7093	-0.0734217	-0.884943	-1.66156	1.72863	-1.50963	0.262087	5.03943
hsa-miR-3943	1.63953	2.79562	6.4706	5.78376e-10	2.20641e-09	11.5466	UP	4.11671	2.12962	2.50615	4.094	3.88579	4.37395	3.95049	2.86215	-0.361248	1.61168	3.97947	4.68759	4.74443	3.30418	3.68952	2.91367	3.20186	4.19573	-1.63592	4.39519	2.90422	4.01313	4.74857	3.52452	4.34023	3.64011	4.00182	-1.57398	-1.63472	3.66108	2.91103	4.74443	-1.61629	5.64663	4.44634	3.4337	-0.884943	4.19923	0.870207	3.57026	1.66883	-1.14451
hsa-miR-3944-3p	2.21927	2.94178	8.90917	1.5747e-16	1.11275e-15	26.4472	UP	4.13191	2.30408	3.13987	3.80361	-0.753	3.90534	1.924	1.02527	-0.361248	4.16637	-1.08331	-1.53249	1.79793	-1.37441	-0.79222	-1.15718	-1.12207	3.68568	-0.429909	1.41243	3.43891	0.640874	3.45834	2.79452	1.01268	4.54103	3.81548	-1.57398	4.57035	3.20708	2.92713	3.26592	3.44962	2.33266	-0.7093	3.89621	4.52252	2.2805	3.35443	-1.50963	2.22563	-1.14451
hsa-miR-3945	2.37689	1.96563	8.28105	9.91085e-15	5.95347e-14	22.351	UP	0.731387	-1.56057	0.0447761	-1.6019	-0.753	-1.33043	0.715843	0.703248	-0.361248	-1.49655	-1.08331	-1.53249	-1.59132	-1.37441	-0.79222	-1.15718	-1.12207	1.72357	-1.63592	-1.45183	-1.63778	-1.67642	3.34105	0.954646	3.6424	-1.62534	2.57274	-1.57398	4.46162	-0.449087	-1.4824	4.27811	4.01677	4.76406	-0.7093	2.77184	5.35209	3.59647	2.52847	1.26318	4.59673	-1.14451
hsa-miR-3977	-1.09925	2.57588	-3.68018	0.000290174	0.00057967	-1.13867	DOWN	0.793539	5.18151	5.2662	2.7302	-0.753	3.60072	-1.63632	3.8263	5.40689	-1.49655	-1.08331	5.71924	4.93422	4.10202	4.74857	-1.15718	-1.12207	5.86461	4.93023	5.75423	4.50575	3.68744	3.67999	4.26211	5.2775	2.90838	1.94437	4.77136	3.71718	5.2149	4.78681	5.15699	5.19381	-1.41896	-0.7093	1.12166	-0.884943	4.27126	4.79622	2.48213	4.7678	4.71469
hsa-miR-410-5p	2.08086	0.336324	7.90077	1.12798e-13	6.1559e-13	19.9497	UP	-1.64092	0.880452	-1.63331	-1.6019	-0.753	2.25342	-1.63632	-1.62016	-0.361248	-1.49655	-1.08331	-1.53249	1.68285	-1.37441	3.95816	3.59647	-1.12207	0.041887	1.41516	-1.45183	-1.63778	-1.67642	-1.29147	-1.57603	-1.66137	-1.62534	-1.65392	1.4449	-0.232639	-1.64422	3.32441	-1.45027	-1.61629	-1.41896	-0.7093	-1.66395	-0.884943	-0.774348	-1.66329	-1.50963	-1.60817	-1.14451
hsa-miR-411-5p	-1.61612	0.703273	-5.49052	1.05393e-07	3.13612e-07	6.46452	DOWN	-1.64092	3.01364	-0.1693	3.65363	-0.753	4.16637	-1.63632	-1.62016	-0.361248	1.28517	-1.08331	5.23887	3.63148	1.94678	3.80779	2.88624	4.72407	3.26432	-0.0478652	4.13629	2.6536	3.72132	-1.29147	-1.57603	3.41764	3.91525	1.93943	4.61624	0.9295	-1.64422	2.22563	3.56173	3.44125	4.46673	4.54526	-1.66395	-0.884943	-0.600696	4.44466	1.8407	4.46162	-1.14451
hsa-miR-422a	3.68177	4.96235	13.4557	7.46684e-31	1.26837e-29	59.2119	UP	5.41586	-1.56057	3.84496	0.685339	-0.753	3.48503	-1.63632	4.03968	-0.361248	3.13748	3.09419	-1.53249	3.77986	-1.37441	-0.79222	-1.15718	-1.12207	4.90039	-1.63592	4.1185	1.88982	-0.329378	2.42541	3.95049	5.19381	4.02242	4.32914	4.57409	4.85404	1.83204	4.93023	-1.45027	5.51554	-1.41896	5.33351	4.138	6.22589	6.92964	6.56963	7.21838	5.169	5.47284
hsa-miR-423-5p	1.12632	6.84474	15.5173	1.13321e-37	2.69137e-36	74.851	UP	5.69614	5.19608	6.23772	5.04686	6.40475	7.31679	5.88274	6.30758	6.90836	6.61624	6.05825	5.47284	6.68167	5.99264	5.27523	5.83986	6.16198	5.77569	6.22958	6.90836	6.62489	6.28646	6.06973	6.56139	6.16198	6.34766	6.32807	6.32009	6.11074	5.7668	6.11798	5.5409	6.43899	7.12574	5.27092	6.39588	5.96559	6.72043	6.08348	5.48081	6.61624	4.68177
hsa-miR-424-3p	-2.3337	0.798978	-8.36953	5.58064e-15	3.44095e-14	22.9185	DOWN	5.40243	1.70551	5.81821	1.79793	-0.753	2.87528	1.25053	2.6206	-0.361248	3.95251	3.97947	4.08063	-1.59132	2.62847	-0.79222	5.13891	4.22294	3.79798	4.43136	2.86016	3.66955	4.36646	2.63887	2.68237	3.2772	2.16924	3.66108	2.92444	3.26789	3.23573	-1.4824	-1.45027	0.23627	3.52087	-0.7093	0.757757	-0.884943	4.16637	3.40098	-1.50963	2.09829	4.67093
hsa-miR-425-3p	1.66152	2.69712	6.12591	3.85393e-09	1.3845e-08	9.69026	UP	3.89621	5.46575	-1.63331	-1.6019	-0.753	4.58497	-1.63632	4.59074	-0.361248	3.68392	-1.08331	4.73713	2.87528	6.43103	5.30684	5.169	4.68378	3.42183	0.489909	3.99436	2.47264	2.08485	-1.29147	0.679657	4.07867	2.2835	1.2698	4.34896	3.08982	3.04588	3.7959	4.46998	-1.61629	-1.41896	-0.7093	6.23772	-0.884943	2.95302	3.61329	4.65639	-1.60817	-1.14451
hsa-miR-4251	2.15739	2.08805	7.1808	9.4475e-12	4.31189e-11	15.5868	UP	1.54313	2.42541	0.47727	3.7282	-0.753	-1.33043	1.81372	1.84317	-0.361248	4.44634	-1.08331	4.65639	2.48213	2.19929	-0.79222	-1.15718	-1.12207	1.71947	2.30652	3.26592	2.91103	-1.6151	4.1683	3.72132	3.8601	-0.110383	-1.65392	-1.57398	-0.544854	4.10662	-1.4824	-1.45027	-1.61629	-1.41896	3.80007	4.06339	-0.884943	2.47774	0.818074	-1.50963	-1.60817	-1.14451
hsa-miR-4254	1.3086	0.528584	5.18114	4.80706e-07	1.32014e-06	4.99185	UP	0.0720478	-1.56057	-1.63331	-1.6019	-0.753	2.77184	-1.63632	1.924	-0.361248	-1.49655	3.15323	4.25173	-1.59132	-1.37441	-0.79222	-1.15718	-1.12207	-0.378457	1.00713	-1.45183	-1.63778	-1.67642	-1.29147	-1.57603	0.568	1.53566	1.30743	-1.57398	3.76407	-1.64422	-1.4824	4.08063	-1.61629	-1.41896	-0.7093	0.455752	-0.884943	-1.054	3.80973	4.38813	-1.60817	-1.14451
hsa-miR-4255	-1.4062	-0.339237	-5.53468	8.44332e-08	2.52708e-07	6.68011	DOWN	-1.64092	-1.56057	-0.34793	3.89441	-0.753	-1.33043	0.297787	1.06385	-0.361248	-1.49655	2.80384	-1.53249	2.76448	-1.37441	-0.79222	-1.15718	-1.12207	-1.67499	-1.63592	-1.45183	-1.63778	-0.522878	-1.29147	-1.57603	-1.66137	3.30675	-1.65392	-1.57398	-1.63472	0.0507304	-1.4824	-1.45027	-1.61629	-1.41896	-0.7093	2.23256	-0.884943	0.818074	2.2805	3.53429	-1.60817	3.96828
hsa-miR-4258	-1.48601	9.35394	-18.3266	6.58488e-47	2.52093e-45	96.0463	DOWN	9.71488	9.56733	10.6642	10.4227	10.3214	10.2631	9.50618	10.1812	9.6861	10.8938	9.50618	9.71488	10.2185	10.1812	9.23446	10.0451	9.16403	9.59648	10.2631	10.8938	10.5257	9.62635	10.0911	10.0681	10.0023	9.4016	9.6861	10.2631	9.9254	9.09504	10.2631	9.16403	10.3849	9.02374	9.84625	10.4227	8.91046	10.3849	9.25687	9.09504	10.5257	9.4016
hsa-miR-4259	-2.26936	5.21866	-13.2676	3.10486e-30	5.0726e-29	57.7932	DOWN	4.99216	6.75993	6.38641	6.26966	6.42195	6.5971	5.87065	5.36288	6.89867	6.79086	5.99264	7.05546	6.81292	6.21475	5.77261	6.92964	7.2493	6.33954	6.98822	6.5189	6.27788	6.49207	6.91907	6.31589	5.36518	6.45179	6.39588	6.70052	5.73111	6.28217	5.52315	6.37834	6.84282	6.43103	-0.7093	6.5367	6.26125	6.17688	5.15252	6.75494	6.60194	7.15072
hsa-miR-4261	-2.1488	2.53409	-8.56245	1.57822e-15	1.01712e-14	24.167	DOWN	4.15145	-1.56057	3.13509	1.75956	4.67468	3.92272	4.29223	2.25116	4.54526	4.20627	-1.08331	0.873235	3.26789	3.73171	3.99804	4.79622	2.82176	5.12123	5.42476	3.94113	4.0615	4.28183	3.51056	4.22873	3.89798	5.03343	4.21742	5.30057	4.05054	4.90824	4.12217	4.03968	3.4989	4.14929	4.7408	2.97336	4.78681	3.93754	4.22114	4.89853	3.4806	3.25058
hsa-miR-4263	-1.37142	-0.0945636	-5.33756	2.24958e-07	6.43276e-07	5.72809	DOWN	0.121378	1.00076	-1.63331	3.93572	3.63148	-1.33043	2.81947	-1.62016	-0.361248	1.82703	3.18369	5.43913	-1.59132	-1.37441	4.03246	4.90608	-1.12207	-1.67499	-1.63592	1.91952	1.77686	-1.24464	-1.29147	-1.57603	-1.66137	-1.62534	0.626552	-1.57398	-1.63472	-1.64422	-1.4824	3.34353	1.20832	-1.41896	-0.7093	-1.66395	-0.884943	1.2698	-1.66329	-1.50963	-1.60817	-1.14451
hsa-miR-4265	2.82755	2.89117	10.8643	1.78561e-22	1.86942e-21	40.0236	UP	1.69478	5.11918	3.12178	-1.6019	-0.753	3.96231	2.64585	3.42183	-0.361248	4.14363	-1.08331	-1.53249	-1.59132	3.21483	3.3799	4.00557	-1.12207	4.96895	0.165139	-1.45183	1.98883	2.75019	4.00964	3.987	4.01313	-1.62534	2.98971	4.07474	2.84661	1.81941	2.54684	2.50615	2.06294	-1.41896	-0.7093	3.47832	-0.884943	2.80384	3.10285	3.81357	3.21483	-1.14451
hsa-miR-4267	-1.41419	1.50448	-4.86842	2.08696e-06	5.3477e-06	3.57243	DOWN	-1.64092	0.623074	1.6711	5.60577	-0.753	3.53429	3.65549	3.75214	5.52078	2.28623	3.6111	2.1739	-1.59132	-1.37441	-0.79222	2.47774	-1.12207	4.65996	3.59647	2.9405	3.5317	3.9962	4.54103	-1.57603	0.0366913	2.89601	2.35314	-1.57398	-1.63472	-1.64422	4.03246	-1.45027	2.39614	-1.41896	-0.7093	0.414261	3.78204	-1.66156	1.46401	-1.50963	1.31018	4.02047
hsa-miR-4268	2.33101	3.06984	8.77064	3.97565e-16	2.68356e-15	25.5307	UP	5.06672	8.54948	-1.63331	-1.6019	-0.753	2.55669	4.42607	0.463207	-0.361248	-1.49655	2.78981	-1.53249	-1.59132	-1.37441	-0.79222	-1.15718	-1.12207	2.37743	1.6711	-1.45183	2.60332	4.11309	2.98375	-1.57603	3.04588	-1.62534	0.9441	2.8798	3.26789	5.03343	3.76013	4.50381	-1.61629	4.73369	4.49817	-1.66395	-0.884943	4.53586	2.96904	5.12913	3.5486	5.5109
hsa-miR-4269	2.01921	3.39005	8.41128	4.25116e-15	2.66607e-14	23.1874	UP	4.24811	-1.56057	-0.0399696	2.99727	-0.753	-1.33043	1.42511	3.33033	-0.361248	-1.49655	4.67468	1.79793	2.6206	4.79822	-0.79222	3.48503	-1.12207	4.17379	4.17023	3.96448	4.14538	2.36837	3.4806	4.04137	1.18783	3.70363	3.67174	4.85607	4.95312	3.83347	3.03438	5.38365	5.01968	-1.41896	-0.7093	1.61827	3.80007	4.02047	0.560822	3.47604	1.26649	-1.14451
hsa-miR-4272	-1.19727	-0.454527	-5.40936	1.57895e-07	4.60228e-07	6.07176	DOWN	4.26767	1.05752	4.85404	1.76657	3.83347	-1.33043	0.355809	2.06294	-0.361248	4.22114	-1.08331	-1.53249	4.18646	-1.37441	-0.79222	2.77853	2.72349	-1.21132	2.62586	1.57093	-1.63778	-0.317965	-1.29147	-1.57603	1.77187	0.241948	1.01877	3.51274	-1.63472	-0.312367	-1.4824	-1.45027	2.37976	-1.41896	4.67281	-1.66395	-0.884943	-1.66156	1.8247	3.39558	-1.60817	-1.14451
hsa-miR-4276	3.25696	4.12374	14.2808	1.41044e-33	2.69984e-32	65.4573	UP	3.52911	3.9245	0.700052	-1.6019	6.09699	2.98749	4.05801	4.48196	-0.361248	-1.49655	4.31856	-1.53249	4.79422	4.9728	5.09793	-1.15718	-1.12207	2.75616	0.47727	-1.45183	3.40579	4.78681	3.97554	2.91739	5.00575	1.517	4.37395	3.36322	2.11328	4.21742	5.07453	4.19375	4.22473	3.86587	-0.7093	3.04843	4.57768	2.78484	4.42771	2.23256	4.31472	-1.14451
hsa-miR-4279	1.56311	4.72009	7.80415	2.07187e-13	1.10716e-12	19.3499	UP	5.38841	4.16637	3.35015	4.82682	4.40978	4.77136	4.88679	5.32017	5.35677	5.03943	-1.08331	3.8711	4.37395	4.35862	4.42771	-1.15718	-1.12207	5.38603	4.61993	5.06672	5.07821	5.10526	5.19381	5.16117	5.79527	4.75455	4.94345	4.34896	5.83986	4.79251	5.10149	4.90417	3.35015	-1.41896	-0.7093	3.42626	-0.884943	5.08975	5.52315	1.45771	5.8768	2.80384
hsa-miR-4282	-1.39021	-0.469849	-6.10656	4.27814e-09	1.52621e-08	9.58819	DOWN	-0.181974	-1.56057	-1.63331	3.81548	-0.753	-1.33043	3.26271	-1.62016	-0.361248	-1.49655	4.36057	3.19108	-1.59132	-1.37441	-0.79222	-1.15718	4.01495	-1.67499	5.42924	-1.45183	3.28491	-0.354461	2.05973	2.33266	0.256787	-1.62534	0.892922	3.987	-1.63472	-0.20677	-1.4824	-1.45027	-1.61629	-1.41896	-0.7093	1.90742	-0.884943	-1.09715	0.174035	-1.50963	0.500352	5.17332
hsa-miR-4286	-1.64977	6.74703	-21.9905	1.51988e-58	1.49942e-56	122.753	DOWN	7.18754	7.31679	7.4793	5.34761	7.68892	7.34033	6.46938	7.67375	7.92593	7.42691	7.92593	7.41369	8.39614	7.82565	8.04255	8.47876	7.66116	7.93993	7.77076	7.55832	7.66116	6.86541	7.44033	7.4793	7.58504	7.5187	7.22434	7.64764	7.61697	7.63577	7.00951	6.74996	7.91862	7.23627	8.36271	7.4793	6.85468	7.11318	6.91907	7.07717	7.40263	7.40263
hsa-miR-4287	1.00152	0.691694	3.67495	0.000295841	0.000588243	-1.15687	UP	-1.64092	1.68748	3.18904	-1.6019	-0.753	-1.33043	3.61566	-1.62016	-0.361248	-1.49655	4.00761	-1.53249	-1.59132	-1.37441	-0.79222	-1.15718	-1.12207	3.3221	3.1307	-1.45183	0.181761	-1.08509	-1.29147	3.72132	-1.66137	0.644491	0.912717	-1.57398	-1.63472	0.439196	-1.4824	-1.45027	3.20369	-1.41896	-0.7093	3.91718	-0.884943	1.924	-0.771522	1.69934	3.74377	2.90422
hsa-miR-4288	1.35882	0.308751	4.93828	1.51221e-06	3.9339e-06	3.88335	UP	-1.64092	4.81341	-1.63331	1.87589	-0.753	-1.33043	-1.63632	-1.62016	-0.361248	-1.49655	-1.08331	-1.53249	2.63375	-1.37441	-0.79222	-1.15718	-1.12207	-1.67499	-0.503957	-1.45183	-1.63778	-1.40137	-1.29147	1.92176	-1.66137	0.9441	-1.65392	2.03519	-1.63472	4.26017	1.81372	-1.45027	-1.61629	-1.41896	-0.7093	-1.13567	-0.884943	0.0197087	2.39393	-1.50963	-1.60817	-1.14451
hsa-miR-4290	2.46245	2.91493	9.71072	6.54041e-19	5.24255e-18	31.8797	UP	4.01495	-1.56057	-1.63331	-1.6019	-0.753	4.26767	4.50768	-0.0631	-0.361248	4.45584	-1.08331	-1.53249	2.24655	-1.37441	-0.79222	2.87086	-1.12207	-0.0025	1.50246	-1.45183	4.58497	2.96235	4.34023	-1.57603	3.73966	4.31296	3.6424	-1.57398	1.80062	3.83797	3.8432	-1.45027	3.67369	-1.41896	3.74788	2.02864	4.17023	1.69239	2.14523	2.48213	4.61624	2.90838
hsa-miR-4292	1.02484	1.80662	3.5263	0.000508228	0.000973566	-1.6648	UP	-1.64092	2.77628	3.2808	4.7678	-0.753	-1.33043	4.37925	3.3373	-0.361248	3.82987	-1.08331	-1.53249	-1.59132	-1.37441	-0.79222	3.85207	6.03977	-1.20377	1.45158	-1.45183	4.05801	4.05463	3.4961	2.97524	2.34647	2.93589	-1.65392	3.68392	2.10296	-1.64422	4.79422	4.01677	2.7302	-1.41896	-0.7093	1.4609	-0.884943	0.853713	3.33253	-1.50963	1.84564	3.12178
hsa-miR-4294	1.51675	10.0021	27.5276	7.53667e-75	2.14795e-72	160.14	UP	9.11859	8.6956	9.23446	8.91046	9.16403	8.97867	8.73805	9.02374	9.18815	9.07314	9.37804	9.35229	9.25687	9.42722	9.21144	9.47975	9.09504	9.4016	9.18815	9.18815	9.23446	9.4016	9.04921	9.35229	9.4016	9.47975	9.86458	9.71488	9.47975	9.6861	9.50618	9.47975	9.50618	9.37804	9.9254	9.18815	9.71488	10.0451	9.09504	9.62635	9.23446	10.136
hsa-miR-4295	-1.63767	0.996608	-5.21872	4.01136e-07	1.11596e-06	5.16718	DOWN	-0.158965	2.90233	3.48282	5.37447	-0.753	-1.33043	3.80007	3.80007	-0.361248	-1.49655	4.44466	-1.53249	2.15987	-1.37441	-0.79222	-1.15718	5.07453	4.33671	3.81548	-1.45183	2.66741	-1.57976	2.76633	-1.57603	3.74582	-1.62534	2.73631	-1.57398	-1.63472	2.99194	-1.4824	3.4713	2.36632	-1.41896	-0.7093	0.937652	-0.884943	-0.589017	3.43656	3.23573	-1.60817	5.82705
hsa-miR-4296	-1.44995	1.27428	-5.06795	8.24203e-07	2.21355e-06	4.46993	DOWN	-0.391343	-1.56057	2.39917	4.29763	-0.753	2.68672	4.56533	3.00772	4.50381	3.41286	3.01364	1.51353	3.54362	2.42541	-0.79222	3.07033	2.84071	1.66324	0.857109	-1.45183	4.27126	3.07272	4.26767	3.48906	1.28517	2.13374	2.80384	4.65996	4.80767	2.90422	3.89621	3.4933	-1.61629	-1.41896	-0.7093	3.03438	-0.884943	2.48996	0.217309	4.17568	2.20483	-1.14451
hsa-miR-4297	2.18286	1.84318	7.63858	5.81706e-13	2.96635e-12	18.3319	UP	-1.64092	3.28491	1.80062	0.591513	-0.753	4.4391	2.76044	-1.62016	-0.361248	-1.49655	4.17379	1.47925	2.48753	-1.37441	-0.79222	3.87447	-1.12207	0.67427	3.07679	3.20708	0.706443	-1.58516	-1.29147	0.6918	0.960213	-1.62534	2.2775	3.29647	1.86447	2.91553	-1.4824	-1.45027	4.39345	-1.41896	-0.7093	2.25116	-0.884943	-1.66156	1.1475	-1.50963	-1.60817	-1.14451
hsa-miR-4299	-1.57043	3.39152	-5.56259	7.33455e-08	2.22377e-07	6.81703	DOWN	1.5089	5.84298	4.29573	6.40032	4.46508	4.29952	4.20804	6.02673	4.97632	6.15511	-1.08331	-1.53249	4.49633	5.18151	-0.79222	-1.15718	-1.12207	4.70927	5.15699	4.97456	5.27523	5.10149	4.4391	5.26021	5.38841	5.7668	5.02547	5.12913	3.20002	4.08997	4.25173	4.94153	4.29223	-1.41896	-0.7093	5.36057	4.00964	4.73369	3.99265	-1.50963	3.77986	2.85817
hsa-miR-4300	-1.08881	2.17822	-3.73662	0.00023515	0.00047643	-0.940653	DOWN	-0.0140261	-1.56057	3.24299	3.37748	3.7959	4.27126	4.29952	0.860504	4.1848	4.58149	5.2913	3.7621	2.19389	-1.37441	-0.79222	-1.15718	5.01968	1.58722	3.05072	4.05463	4.56694	4.19177	5.2149	3.08366	4.86379	4.51115	5.25809	4.25805	-1.63472	4.18646	4.76406	5.60577	4.76958	-1.41896	-0.7093	2.76263	3.50633	4.98038	1.9492	-1.50963	2.49239	3.08366
hsa-miR-4305	2.67924	1.30287	10.8166	2.52155e-22	2.58711e-21	39.6808	UP	1.91952	-1.56057	0.757757	-1.6019	-0.753	-1.33043	1.59817	-1.62016	-0.361248	-1.49655	3.80779	-1.53249	1.07646	-1.37441	-0.79222	-1.15718	-1.12207	-1.67499	0.00791739	-1.45183	-1.63778	-1.24196	-1.29147	0.812139	-1.66137	-1.62534	1.56205	-1.57398	-1.63472	2.75213	-1.4824	-1.45027	-1.61629	3.48503	-0.7093	3.85207	-0.884943	-1.66156	-0.35723	2.01421	0.137596	-1.14451
hsa-miR-431-3p	1.17954	1.12297	4.17624	4.20371e-05	9.31133e-05	0.691656	UP	0.4497	-1.56057	-1.63331	0.976035	-0.753	-1.33043	1.3739	-1.62016	-0.361248	3.57981	-1.08331	-1.53249	-1.59132	-1.37441	-0.79222	4.31472	-1.12207	0.685339	2.9405	-1.45183	2.31347	0.419678	-1.29147	3.053	-1.66137	0.679657	0.51473	2.93589	-0.1893	0.355809	3.23165	3.96828	-1.61629	-1.41896	-0.7093	4.46335	3.99436	1.60832	1.5818	-1.50963	-1.60817	-1.14451
hsa-miR-4312	1.08944	3.32084	4.30198	2.5006e-05	5.67615e-05	1.18733	UP	1.51353	1.72152	-0.135574	3.2945	4.87536	5.85785	5.12123	5.33351	4.27126	1.48542	-1.08331	4.39519	-1.59132	3.6424	4.23676	4.84427	3.26271	2.03756	4.33301	-1.45183	3.81843	4.46162	3.10502	1.69934	2.49493	4.05801	1.6249	2.48753	2.58	3.8432	3.71929	3.25896	-1.61629	4.6397	-0.7093	0.568	-0.884943	2.53088	4.39345	3.95049	2.45107	4.70208
hsa-miR-4314	2.16355	0.989935	8.1091	2.99878e-14	1.71311e-13	21.2574	UP	1.04811	-1.56057	0.0143087	0.9295	-0.753	-1.33043	1.76169	2.30652	-0.361248	1.98156	-1.08331	2.35998	-1.59132	-1.37441	-0.79222	-1.15718	4.08997	-1.08977	-0.146817	-1.45183	3.11312	1.25657	-1.29147	-1.57603	1.57943	2.85817	1.95392	-1.57398	2.55384	-1.64422	-1.4824	-1.45027	-1.61629	-1.41896	-0.7093	-0.572222	-0.884943	2.56445	-1.66329	-1.50963	-1.60817	-1.14451
hsa-miR-4317	-2.56153	1.13657	-8.86192	2.16128e-16	1.49829e-15	26.1338	DOWN	5.8461	0.863841	5.13891	0.67427	3.58418	4.28345	4.58883	4.06529	-0.361248	3.09649	-1.08331	1.90511	3.86213	4.20441	4.36253	4.04306	-1.12207	3.20539	2.91367	4.29952	4.67093	4.77547	3.25058	2.63375	3.43656	4.26405	5.17332	4.88323	1.40669	2.17157	-1.4824	2.34647	0.146804	4.61993	-0.7093	1.18146	-0.884943	-0.351691	4.58883	2.94675	3.12659	4.64509
hsa-miR-4319	1.80132	0.879147	6.77826	1.00564e-10	4.17389e-10	13.2624	UP	0.906474	-1.56057	2.08821	-1.6019	-0.753	-1.33043	-1.63632	-1.62016	-0.361248	-1.49655	-1.08331	3.86213	-1.59132	-1.37441	-0.79222	-1.15718	-1.12207	-1.67499	-1.63592	-1.45183	-1.63778	-1.60836	-1.29147	4.6858	3.35843	-1.62534	1.23051	-1.57398	3.86934	-1.64422	-1.4824	-1.45027	4.69114	-1.41896	-0.7093	-0.419443	-0.884943	1.79793	3.78421	-1.50963	-1.60817	-1.14451
hsa-miR-4321	1.06567	1.44667	3.7807	0.000199205	0.000406595	-0.784191	UP	-1.64092	1.93717	3.11518	-1.6019	-0.753	4.6858	4.11671	3.23369	-0.361248	-1.49655	-1.08331	-1.53249	3.62793	-1.37441	-0.79222	-1.15718	-1.12207	3.87632	2.85817	2.81257	-1.63778	2.43923	3.84496	-1.57603	-0.637328	1.28517	-0.600696	4.1397	3.97192	-1.64422	2.32777	-1.45027	-1.61629	-1.41896	-0.7093	2.9577	-0.884943	1.99136	0.573509	0.951752	1.87381	-1.14451
hsa-miR-4324	1.94948	0.372081	8.02185	5.23469e-14	2.93807e-13	20.7074	UP	1.66883	-1.56057	-1.63331	-1.6019	-0.753	-1.33043	-1.63632	0.174035	-0.361248	-1.49655	-1.08331	-1.53249	-1.59132	2.2775	-0.79222	-1.15718	-1.12207	-1.67499	-1.63592	-1.45183	-1.63778	2.5212	-1.29147	-1.57603	-1.03124	-1.62534	-0.53753	-1.57398	-1.63472	-1.64422	-1.4824	-1.45027	4.34023	2.45378	-0.7093	-1.66395	-0.884943	0.757757	-1.66329	2.18873	0.269111	-1.14451
hsa-miR-4326	2.69776	1.45708	10.6597	7.82912e-22	7.70358e-21	38.5557	UP	0.465687	3.66955	-0.366539	1.87589	-0.753	2.41435	-1.63632	2.8016	-0.361248	-1.49655	-1.08331	-1.53249	-1.59132	2.89601	-0.79222	-1.15718	-1.12207	4.45211	1.39101	-1.45183	1.49731	-1.19352	-1.29147	3.5317	-1.66137	-1.62534	-1.65392	0.790176	3.89621	-1.64422	3.73966	-1.45027	3.80973	-1.41896	-0.7093	3.66108	-0.884943	2.21163	4.35862	-1.50963	-1.60817	-1.14451
hsa-miR-4329	1.98492	1.72121	7.11798	1.37403e-11	6.21587e-11	15.2183	UP	0.764248	1.56523	-1.63331	-1.6019	-0.753	-1.33043	2.69107	-0.135574	-0.361248	3.87995	-1.08331	4.55293	-1.59132	2.71882	-0.79222	-1.15718	-1.12207	-1.67499	-1.63592	-1.45183	2.15987	2.714	3.08775	-1.57603	0.548735	-1.62534	4.34023	4.66352	4.26017	3.77428	1.90073	3.9831	3.6424	4.84843	-0.7093	4.05632	-0.884943	-0.4035	2.1222	-1.50963	4.84427	-1.14451
hsa-miR-433-5p	4.07483	1.8241	16.1917	6.65944e-40	1.7254e-38	79.9698	UP	-1.64092	-1.56057	-1.63331	-1.6019	-0.753	-1.33043	-1.63632	-1.62016	-0.361248	-1.49655	3.31154	1.12166	2.34455	-1.37441	-0.79222	-1.15718	-1.12207	2.62586	-1.63592	3.18904	-1.63778	-1.57398	2.9405	2.58651	2.77406	-1.62534	0.55737	2.11964	0.560822	-1.64422	-1.4824	-1.45027	-1.61629	-1.41896	-0.7093	-1.66395	-0.884943	-1.66156	2.24219	-1.50963	0.779735	-1.14451
hsa-miR-4418	-2.34221	1.45881	-7.65839	5.14455e-13	2.63915e-12	18.453	DOWN	2.69107	7.11318	-1.63331	5.72238	3.69559	-1.33043	3.80973	4.76406	5.31109	-1.49655	2.89189	2.48753	-1.59132	5.19381	-0.79222	-1.15718	-1.12207	4.62289	0.940876	5.11327	-1.63778	4.04306	3.00988	4.18812	4.33486	4.69478	4.39714	-1.57398	4.14363	4.94345	2.00799	-1.45027	2.7302	-1.41896	-0.7093	0.495617	-0.884943	3.81167	5.21932	4.37203	4.63795	-1.14451
hsa-miR-4419a	1.59494	4.52315	7.60975	6.9534e-13	3.52479e-12	18.156	UP	4.23676	1.06385	5.59787	4.44104	-0.753	5.06272	4.53586	0.0197087	4.64509	4.45035	4.22873	3.18369	1.50568	-1.37441	-0.79222	3.89441	4.62652	-0.937509	4.29398	5.24572	4.25593	4.24049	4.89312	4.35862	4.31664	4.20627	4.78681	5.06079	3.3799	4.60103	5.18562	4.94538	5.57283	5.38841	-0.7093	4.84635	3.93754	4.72214	3.0919	4.41143	4.77547	3.6297
hsa-miR-4419b	-1.14679	6.5769	-19.43	1.79366e-50	9.2015e-49	104.228	DOWN	6.92964	5.31109	8.0356	6.86541	7.74304	6.74996	6.57914	6.56963	7.35223	6.89867	7.55832	6.48333	6.90836	6.06192	5.8517	7.26368	7.095	7.12574	7.00951	7.16294	6.5971	6.74996	7.66746	7.49237	6.89867	6.63407	8.2302	7.55832	7.74304	7.16294	7.22434	7.63577	7.2493	7.03251	7.07717	7.50615	7.41369	7.32884	6.9407	7.68892	7.21241	7.36533
hsa-miR-4420	-1.5068	1.96123	-4.74732	3.61831e-06	9.08119e-06	3.04203	DOWN	4.15899	-1.56057	6.69584	1.52724	-0.753	-1.33043	3.36322	1.02527	-0.361248	3.8711	-1.08331	3.1957	6.16198	4.6247	5.81517	-1.15718	4.71469	0.957539	0.65533	3.68195	4.99997	3.80779	5.92936	5.67957	4.16637	2.55954	4.47655	6.21475	0.198104	4.0615	5.96559	4.81147	6.07707	4.58497	-0.7093	3.10067	3.43085	4.20982	3.77799	3.36083	4.8286	-1.14451
hsa-miR-4423-5p	-3.05221	1.39283	-10.1207	3.67527e-20	3.26196e-19	34.7351	DOWN	-0.613578	-1.56057	2.43383	3.21126	-0.753	4.79822	6.16939	3.80361	-0.361248	4.59673	5.73111	6.73982	4.92835	-1.37441	4.14363	4.03615	4.99404	5.57283	1.03858	4.53782	4.32914	3.36525	4.14363	4.72407	4.85785	3.33253	3.71718	2.98971	-1.63472	3.43656	3.68392	-1.45027	1.48542	-1.41896	-0.7093	0.286152	3.74788	-1.66156	0.179817	-1.50963	2.40806	4.19573
hsa-miR-4427	-1.51607	0.190207	-5.87171	1.49211e-08	4.95117e-08	8.36832	DOWN	5.62992	1.61827	3.94113	3.90918	-0.753	-1.33043	1.60497	4.8716	-0.361248	-1.49655	-1.08331	3.0919	4.20255	4.8286	3.71098	-1.15718	4.98823	-0.707565	-1.63592	-1.45183	-1.63778	3.64725	-1.29147	2.41435	-1.66137	3.42626	-1.65392	3.21126	3.24299	0.226878	-1.4824	5.15065	5.26233	1.93491	4.55293	2.11328	-0.884943	-1.66156	0.131809	2.45107	4.64901	3.8711
hsa-miR-4429	-1.33045	6.85093	-16.7426	1.01267e-41	3.02035e-40	84.1417	DOWN	7.27766	7.18754	8.2142	6.96498	7.64764	7.26368	7.07717	7.55832	7.58504	7.58504	7.46683	7.40263	7.93993	7.08956	7.37779	7.89693	7.8526	8.0583	7.868	7.57126	7.74304	7.4534	7.0496	7.4534	7.55832	8.0583	7.9113	7.81216	7.78486	7.66116	7.53124	7.985	7.57126	6.74996	7.4793	7.81216	7.76327	7.46683	7.39062	8.10339	7.05546	7.32884
hsa-miR-4431	2.74641	0.810929	10.1279	3.49442e-20	3.11222e-19	34.7852	UP	-1.64092	0.969209	-1.63331	1.52047	-0.753	-1.33043	-1.63632	0.249746	-0.361248	3.31545	-1.08331	2.89189	-1.59132	-1.37441	-0.79222	-1.15718	-1.12207	-1.67499	-1.63592	-1.45183	1.31948	-0.462139	-1.29147	-1.57603	-1.66137	-1.62534	-1.65392	1.25053	-1.63472	-0.191865	-1.4824	-1.45027	3.67369	-1.41896	-0.7093	-1.66395	-0.884943	3.10502	-1.66329	-1.50963	-1.60817	-1.14451
hsa-miR-4434	-3.45422	2.11019	-12.1751	1.14763e-26	1.57415e-25	49.6184	DOWN	4.78681	6.47862	5.76033	4.31472	-0.753	3.19108	4.85785	4.51289	-0.361248	4.15145	4.53782	7.07717	5.95214	5.58033	5.16531	-1.15718	5.59787	4.03968	2.51621	5.41586	4.0921	2.88213	5.05887	5.51554	4.71115	4.1848	5.26856	5.58763	-1.63472	4.0037	5.18151	4.82315	5.73613	3.93933	6.04693	-1.66395	3.32441	1.53316	4.29952	5.4367	0.771743	2.55954
hsa-miR-4435	3.26476	5.07485	13.6064	2.3797e-31	4.06928e-30	60.3504	UP	0.857109	2.84466	5.02757	3.94484	4.65639	-1.33043	4.52252	2.31347	4.79422	5.04312	3.80184	4.30745	4.89677	-1.37441	5.66297	4.73713	6.3319	4.03615	4.16637	4.04706	5.66581	3.65549	4.24421	2.08821	3.20186	5.09793	4.21176	3.26789	4.0037	4.26767	1.8549	5.18774	5.40466	-1.41896	-0.7093	4.35079	4.33301	3.44125	3.6916	3.93754	3.23573	3.65549
hsa-miR-4436a	1.6429	1.1629	5.73819	2.99029e-08	9.51624e-08	7.69055	UP	0.923298	3.57026	-1.63331	-1.6019	-0.753	-1.33043	-0.0478652	-1.62016	-0.361248	-1.49655	-1.08331	-1.53249	2.89601	3.8601	-0.79222	-1.15718	-1.12207	4.21928	-0.0734217	-1.45183	-0.2045	3.2808	-1.29147	3.93933	-1.66137	0.764248	0.831639	-1.57398	-1.63472	-0.0025	-1.4824	3.0857	-1.61629	-1.41896	-0.7093	-1.66395	-0.884943	3.38204	2.43152	1.56523	2.6206	-1.14451
hsa-miR-4436b-3p	-1.60288	2.61067	-6.06926	5.22863e-09	1.83718e-08	9.39212	DOWN	1.23051	5.23223	3.07033	-1.6019	-0.753	3.03649	3.52911	4.77547	-0.361248	2.55954	3.02962	5.99907	4.60472	4.17757	-0.79222	4.9377	3.71506	5.14877	3.53658	4.80192	4.34896	4.0615	4.44298	4.36253	3.8057	4.37763	5.59259	4.33301	-1.63472	4.45035	3.50839	4.05975	5.42027	5.28468	-0.7093	5.05887	3.71098	2.59759	-0.248661	4.36057	5.28468	4.25593
hsa-miR-4438	-1.41264	1.33453	-5.20483	4.28921e-07	1.1881e-06	5.10228	DOWN	4.57035	4.78476	4.8286	1.64663	-0.753	4.30392	2.39614	0.267035	-0.361248	1.09418	-1.08331	5.46098	2.50351	2.68455	-0.79222	5.3701	3.00988	3.54611	4.29952	4.18812	4.39909	2.5443	-1.29147	0.79675	3.26083	1.67337	3.7282	-1.57398	-1.63472	5.14478	2.03519	4.59673	1.65816	3.14822	4.32584	1.18783	-0.884943	2.81717	2.62586	-1.50963	1.18783	-1.14451
hsa-miR-4439	-1.45724	2.92768	-5.50414	9.84433e-08	2.93272e-07	6.53083	DOWN	3.21126	5.59259	6.1806	0.573509	5.36288	3.93754	3.26271	4.32584	5.45357	4.93962	3.45174	6.5529	1.98383	-1.37441	5.97948	5.55209	3.81843	5.5058	4.83611	5.97948	5.38603	4.75844	3.51056	5.10893	4.37763	4.57589	3.28286	5.04312	4.21556	4.9728	5.12123	4.79822	5.17754	-1.41896	4.29952	-1.66395	4.9728	-1.66156	2.01421	1.49731	5.16117	3.00556
hsa-miR-4441	1.04946	-0.365933	4.88559	1.92875e-06	4.96212e-06	3.6485	UP	-1.64092	-1.56057	1.95632	-1.6019	-0.753	-1.33043	-1.63632	-1.62016	-0.361248	-1.49655	-1.08331	-1.53249	-1.59132	-1.37441	-0.79222	-1.15718	-1.12207	-1.67499	1.12867	-1.45183	8.07172	-1.60679	-1.29147	-1.57603	-1.66137	-1.62534	-1.65392	-1.57398	-1.63472	-1.64422	-1.4824	3.58824	-0.00698261	-1.41896	-0.7093	-1.66395	-0.884943	-1.66156	-1.66329	-1.50963	-1.60817	-1.14451
hsa-miR-4444	-2.48105	3.41757	-12.2677	5.74897e-27	8.05799e-26	50.306	DOWN	4.52252	4.62855	5.99907	5.32679	4.94937	4.35862	3.78836	5.45856	4.90608	4.66726	4.52434	-1.53249	4.96502	5.2413	4.72972	3.67564	5.71924	4.99997	5.19835	4.94345	4.05258	5.169	5.05512	5.14478	4.07277	5.22388	5.4757	4.8173	4.64327	5.54611	4.57768	5.3701	5.25809	2.10062	4.15145	4.48744	6.34335	5.11327	4.42046	4.08997	4.58883	4.93596
hsa-miR-4448	-2.41986	7.8356	-14.6769	6.8902e-35	1.41387e-33	68.4645	DOWN	8.7593	11.2138	10.5613	11.9767	9.6861	8.41383	8.91046	9.28104	9.13985	8.24849	8.62172	10.4543	8.02865	8.31358	7.71619	8.60238	9.53519	9.30392	8.93129	8.97867	9.07314	8.0583	7.55832	7.985	8.47876	8.44524	8.15064	8.15064	8.0583	8.2302	8.02865	8.73805	8.39614	7.99923	7.82565	9.23446	11.5826	10.0023	10.2631	11.0708	7.77076	10.5955
hsa-miR-4450	1.32301	5.64959	6.93871	3.95744e-11	1.7089e-10	14.1784	UP	4.93023	5.2542	4.34713	6.64345	-0.753	6.65388	4.24235	5.18987	-0.361248	3.47604	4.92069	6.29462	5.8517	4.39171	-0.79222	5.29344	5.06079	5.62992	5.38365	5.46811	4.88323	5.18987	5.24572	5.62992	5.5058	5.19835	5.69614	5.74525	5.27523	4.89853	5.16531	4.73369	5.53037	2.11964	-0.7093	3.39876	4.96287	5.5058	4.79622	7.67375	3.57026	5.27977
hsa-miR-4454	-2.53781	10.4056	-26.3131	2.04659e-71	4.03808e-69	152.271	DOWN	11.3187	11.4216	11.3187	10.9346	11.8722	11.1643	10.0911	11.0708	11.9209	11.0943	11.8006	11.1179	12.4434	11.3691	11.8006	12.5117	12.4434	12.2507	12.1909	11.8722	11.6887	11.2138	11.1179	12.1909	11.8722	12.3088	11.6381	12.0842	11.9209	11.8006	10.9346	11.0203	12.4434	10.7731	12.6493	12.1909	11.5336	11.3187	11.0203	11.4216	11.4216	12.1909
hsa-miR-4456	2.07313	0.787393	7.67852	4.53976e-13	2.33825e-12	18.5763	UP	4.09591	-1.56057	-1.63331	0.183704	-0.753	-1.33043	0.36687	-1.62016	-0.361248	-1.49655	-1.08331	-1.53249	-1.59132	3.01364	-0.79222	-1.15718	-1.12207	-1.67499	-1.63592	-1.45183	1.58973	-1.00659	-1.29147	-1.57603	-1.66137	0.731387	-1.65392	-1.57398	-1.63472	-1.64422	-1.4824	1.6364	-1.61629	3.83347	-0.7093	-1.66395	-0.884943	-0.629252	-1.66329	-1.50963	-1.60817	-1.14451
hsa-miR-4457	-1.49701	-0.295348	-6.12613	3.8494e-09	1.3845e-08	9.69141	DOWN	-1.64092	-1.56057	-1.63331	-1.6019	-0.753	-1.33043	3.82987	3.67174	-0.361248	-1.49655	2.92444	3.5486	2.10772	3.99094	-0.79222	-1.15718	4.39171	-1.67499	2.72795	4.17023	4.6066	-0.884943	-1.29147	-1.57603	-1.66137	4.60472	2.09333	-1.57398	0.615457	3.4989	-1.4824	4.58149	4.1848	-1.41896	-0.7093	0.679657	-0.884943	-1.66156	-1.66329	-1.50963	-1.60817	-1.14451
hsa-miR-4459	1.0911	9.09711	18.7388	3.03137e-48	1.31787e-46	99.1148	UP	8.37758	7.83912	7.985	8.37758	8.2649	8.71606	8.04255	8.2302	8.42197	8.67584	8.78166	8.0894	8.63905	8.60238	8.31358	8.88919	8.46354	8.63905	8.32963	8.31358	8.34582	8.32963	8.37758	8.63905	8.78166	8.43012	9.32848	9.02374	8.49513	8.6956	8.56592	8.8467	8.73805	8.7593	9.47975	8.82378	8.65844	9.04921	8.78166	8.86813	8.51401	8.91046
hsa-miR-4460	-2.63108	1.19225	-8.57871	1.41799e-15	9.18468e-15	24.2729	DOWN	5.13891	4.89853	7.05546	2.81947	-0.753	-1.33043	4.18812	4.9377	-0.361248	3.66287	5.21932	6.16198	2.3185	3.92272	-0.79222	2.8798	6.14787	4.02437	0.6671	4.78681	4.20982	4.55472	-1.29147	3.9831	-0.839983	3.98897	5.01968	3.57026	3.9303	4.94937	4.26405	5.40243	-1.61629	4.12405	-0.7093	3.82233	3.8601	1.82936	-1.66329	2.61326	6.29462	4.36449
hsa-miR-4461	-1.72944	0.114822	-6.56198	3.45879e-10	1.36911e-09	12.0505	DOWN	-0.511787	3.67999	-1.63331	1.69239	4.26405	-1.33043	2.1671	1.44863	-0.361248	-1.49655	3.09419	-1.53249	3.95251	4.27126	-0.79222	4.91039	4.20804	-1.39093	-1.63592	-1.45183	4.3112	2.81257	-1.29147	3.82987	-0.0587957	3.89261	3.75001	2.19659	1.41789	3.60464	3.55966	4.87741	3.58824	-1.41896	-0.7093	3.6089	5.04312	-1.66156	-1.66329	-1.50963	2.18873	-1.14451
hsa-miR-4470	-1.0729	2.90341	-3.56626	0.000440176	0.000854695	-1.5301	DOWN	-1.64092	2.92092	2.39917	10.5955	4.77547	5.34761	4.77896	4.14929	-0.361248	3.77986	5.77878	2.68015	1.48234	-1.37441	-0.79222	4.57768	3.21126	2.85817	2.35314	4.89853	4.15517	2.23493	4.6691	2.98375	-1.66137	1.63882	0.224404	2.75407	2.4432	0.127491	3.87816	3.45387	5.06472	3.21483	-0.7093	4.58149	4.20441	3.05715	4.70927	3.02962	-1.60817	3.4623
hsa-miR-4473	-1.05208	0.39651	-3.91338	0.000119799	0.00025208	-0.303407	DOWN	-1.64092	3.48503	-1.63331	4.1644	-0.753	3.07033	3.07272	1.96697	-0.361248	4.22473	-1.08331	4.47655	-1.59132	2.45378	-0.79222	-1.15718	5.25809	0.23123	-1.63592	3.01555	3.00988	-0.645922	-1.29147	1.06385	4.41309	1.44116	-1.65392	-1.57398	1.31621	2.46441	2.45891	5.14087	4.48196	3.42404	-0.7093	-0.625026	-0.884943	1.96697	-1.66329	-1.50963	3.20369	-1.14451
hsa-miR-4474-3p	1.6277	0.573293	6.08616	4.77473e-09	1.68694e-08	9.48086	UP	2.23256	-1.56057	0.983343	-1.6019	-0.753	-1.33043	-1.63632	-0.0858261	-0.361248	-1.49655	-1.08331	3.9321	-1.59132	-1.37441	-0.79222	-1.15718	-1.12207	-1.67499	-1.63592	-1.45183	-1.63778	-1.60768	-1.29147	3.4806	3.51672	-1.62534	-1.65392	-1.57398	0.137596	4.07474	-1.4824	3.69559	-1.61629	-1.41896	-0.7093	-1.66395	-0.884943	-1.66156	-1.66329	-1.50963	3.43891	-1.14451
hsa-miR-4475	-3.29177	1.6262	-12.5542	6.72292e-28	9.74253e-27	52.4411	DOWN	4.34023	5.18562	2.49747	5.90495	3.4806	4.67093	1.47629	4.35079	-0.361248	1.92998	4.5	2.75407	4.15145	4.65639	-0.79222	4.61198	2.85084	3.06573	5.13343	3.21939	3.73966	1.71947	3.93754	4.6691	4.30933	-1.62534	4.24421	5.16531	4.28898	2.66273	4.18812	4.094	4.99592	3.60677	-0.7093	4.64901	-0.884943	5.52315	4.84427	5.49702	1.56523	-1.14451
hsa-miR-4476	2.02614	6.57452	10.8081	2.68182e-22	2.74058e-21	39.6196	UP	2.43923	3.59647	3.46032	5.75728	4.4578	6.5013	5.40689	6.80126	4.76406	6.28646	6.56963	3.23967	5.99264	5.7668	-0.79222	6.00583	6.01563	5.18987	5.53037	6.5013	5.90175	5.4634	5.68502	5.97596	6.27788	5.59259	5.4367	5.36518	5.64091	5.80161	6.08705	5.56246	6.46485	4.24421	-0.7093	5.74847	5.2216	6.37834	5.73362	6.61151	5.14087	5.73613
hsa-miR-4477b	-1.08572	-0.905128	-5.68883	3.85582e-08	1.20759e-07	7.44291	DOWN	1.77686	-1.56057	-1.63331	-1.6019	-0.753	-1.33043	-1.63632	-1.62016	-0.361248	-1.49655	4.57768	-1.53249	1.03253	-1.37441	-0.79222	-1.15718	-1.12207	-1.67499	9.42722	-1.45183	-1.63778	-1.48519	-1.29147	-1.57603	1.0543	3.21939	1.33735	-1.57398	-0.216552	2.20483	1.59224	-1.45027	-1.61629	-1.41896	-0.7093	-1.66395	-0.884943	-1.66156	-1.66329	-1.50963	-1.60817	3.77986
hsa-miR-4478	2.0056	4.45771	9.84968	2.47812e-19	2.06376e-18	32.842	UP	3.8601	-1.56057	2.27458	1.28214	-0.753	3.39876	4.54526	3.51056	-0.361248	-1.49655	4.44466	1.18146	4.41309	4.28507	-0.79222	4.66352	-1.12207	3.25453	4.26767	-1.45183	4.98823	3.17544	3.76407	3.18369	3.0278	4.3701	5.42027	4.73896	4.68378	5.11327	4.28898	4.38813	4.67648	4.344	-0.7093	4.68938	5.58256	3.82233	4.77136	2.94675	5.2149	2.6084
hsa-miR-4479	1.46738	3.65474	5.9159	1.18256e-08	3.98589e-08	8.59518	UP	5.37939	-1.56057	4.30745	-1.6019	-0.753	3.21483	3.24884	3.11128	4.83611	2.94675	3.64725	-1.53249	-1.59132	4.83611	4.61198	3.58418	-1.12207	-1.67499	5.43427	5.54351	5.31109	4.38248	2.38649	3.0386	4.56533	4.30745	5.09332	4.77896	2.78484	3.9775	4.60472	2.88802	2.19389	2.98749	4.7888	4.24992	3.77044	4.5	5.69614	-1.50963	-1.60817	-1.14451
hsa-miR-448	-1.28424	0.982295	-4.05542	6.84735e-05	0.00014834	0.227318	DOWN	1.40669	3.89261	1.6364	5.37447	4.22114	3.43656	3.68952	1.51122	-0.361248	4.26017	-1.08331	2.26683	-1.59132	-1.37441	3.89621	-1.15718	-1.12207	2.14523	3.8432	3.4623	0.0659652	1.54313	3.60072	-1.57603	2.88802	-1.62534	3.40098	-1.57398	-1.63472	-1.64422	-1.4824	-1.45027	-1.61629	-1.41896	-0.7093	-1.66395	-0.884943	2.55954	2.56445	3.00772	-1.60817	5.90175
hsa-miR-4480	-4.29396	4.67471	-15.5398	9.54931e-38	2.28916e-36	75.0215	DOWN	2.96904	8.0583	7.63577	10.8938	7.63577	6.87665	7.5187	7.10043	7.81216	6.42195	8.02865	8.91046	5.2985	6.84282	6.45623	7.59813	8.56592	7.35223	7.66116	7.82565	7.9113	6.80126	5.08	6.44735	7.00951	7.868	6.62489	5.45856	7.21241	7.81216	6.31169	7.62351	6.31169	4.42771	-0.7093	5.75423	7.10043	5.09332	6.30758	6.46485	5.98584	6.91907
hsa-miR-4481	4.95409	3.58452	19.8094	1.09417e-51	6.10118e-50	107.016	UP	-0.266557	3.96231	-1.63331	-1.6019	-0.753	4.56371	0.542578	4.45211	-0.361248	-1.49655	-1.08331	-1.53249	-1.59132	-1.37441	4.34557	-1.15718	-1.12207	4.48196	4.31856	-1.45183	0.553917	3.43085	3.16847	4.69289	4.37395	0.101917	4.4578	3.74788	3.35015	4.02863	3.30914	1.61168	5.19835	-1.41896	-0.7093	4.20627	-0.884943	4.09591	-1.66329	-1.50963	1.48842	-1.14451
hsa-miR-4482-3p	2.72578	2.53227	11.1828	1.7578e-23	1.92682e-22	42.3268	UP	4.37395	3.45387	2.6536	-1.6019	3.64725	-1.33043	3.55759	4.0488	-0.361248	-1.49655	-1.08331	-1.53249	2.81042	3.52087	-0.79222	-1.15718	-1.12207	4.06529	1.84317	-1.45183	0.818074	2.33698	-1.29147	-1.57603	1.95632	-1.62534	4.02047	3.70739	3.44125	4.90225	3.50159	2.46918	3.8711	-1.41896	-0.7093	4.14538	-0.884943	4.54103	-1.07937	2.04498	3.85039	-1.14451
hsa-miR-4485-3p	-1.79467	2.0633	-5.8206	1.94964e-08	6.3705e-08	8.10747	DOWN	5.05512	3.80361	4.92449	2.9405	6.07707	-1.33043	3.54362	1.60497	4.96895	5.43427	4.72599	5.75423	4.08783	3.78836	3.8601	3.71506	5.73613	4.72018	4.67648	5.78394	6.14787	5.98924	-1.29147	4.77721	4.88323	5.62735	4.59888	4.42046	5.83287	3.57552	2.6084	4.00182	5.31109	-1.41896	4.17201	4.95312	5.2542	-1.66156	0.584713	-1.50963	5.04312	5.24572
hsa-miR-4489	-1.36806	4.56178	-7.57133	8.81524e-13	4.43355e-12	17.9222	DOWN	4.55091	3.24299	6.11074	6.75993	4.85963	5.50161	5.15699	5.97244	4.7908	5.16117	5.98584	5.7697	5.16117	4.71821	3.96448	5.52078	6.73982	4.41854	5.52551	4.26767	5.71924	5.2985	5.00986	5.70189	4.93422	5.52078	5.16531	5.08603	5.16117	5.32916	3.94113	5.80852	5.80852	3.96638	-0.7093	5.43427	6.21475	5.48305	5.21062	6.03672	4.39714	5.11327
hsa-miR-4490	-3.05849	0.906251	-10.4533	3.44711e-21	3.20356e-20	37.084	DOWN	-1.64092	4.20627	3.77612	7.27067	-0.753	4.67828	4.04306	3.11128	-0.361248	-1.49655	-1.08331	4.75268	4.78083	-1.37441	-0.79222	3.9775	5.75423	2.63375	4.06529	5.22607	4.47327	1.51353	-1.29147	3.73171	3.14218	4.41309	2.91367	3.71506	4.74857	4.6691	3.55274	2.64347	5.43913	3.44543	-0.7093	1.34287	4.15517	2.16496	-1.66329	5.61951	3.00556	-1.14451
hsa-miR-4494	-1.2955	-0.134159	-5.32731	2.36554e-07	6.72683e-07	5.67932	DOWN	-1.64092	-1.56057	3.08366	3.2808	-0.753	2.89189	1.66604	4.23469	-0.361248	-1.49655	-1.08331	-1.53249	-1.59132	-1.37441	-0.79222	-1.15718	-1.12207	2.73246	-1.63592	1.42511	0.244528	-0.534346	-1.29147	-1.57603	-0.176439	2.00799	-1.65392	2.30895	-1.63472	1.64663	-1.4824	-1.45027	-1.61629	-1.41896	-0.7093	1.50246	3.70739	-1.66156	-1.66329	4.45388	1.75484	-1.14451
hsa-miR-4499	2.06999	1.17249	7.62165	6.46006e-13	3.28771e-12	18.2286	UP	3.57552	1.53316	-1.63331	-1.6019	-0.753	-1.33043	-1.63632	1.59817	-0.361248	-1.49655	-1.08331	-1.53249	-1.59132	-1.37441	-0.79222	-1.15718	-1.12207	-1.67499	1.4012	-1.45183	0.799961	1.36244	-1.29147	-1.57603	4.62652	-1.62534	3.5945	-1.57398	3.57026	1.30743	-1.4824	4.36828	-1.61629	-1.41896	-0.7093	3.02962	-0.884943	1.45453	-1.10382	-1.50963	-1.60817	-1.14451
hsa-miR-449b-3p	2.02046	3.86756	8.83709	2.55185e-16	1.74547e-15	25.9694	UP	5.21932	-1.56057	4.17568	0.326991	4.09591	4.56694	4.31472	4.49254	5.25614	5.45856	4.48196	3.87632	5.14478	3.10502	-0.79222	-1.15718	4.25805	1.76657	2.98749	2.15508	4.65639	4.91039	4.1397	4.24811	4.73369	4.93596	4.63442	4.79822	4.77547	3.8263	5.21711	4.54526	4.71469	-1.41896	-0.7093	4.76406	-0.884943	4.96895	5.08975	-1.50963	3.81843	-1.14451
hsa-miR-449c-3p	1.02054	0.611097	3.82819	0.000166314	0.000344307	-0.613775	UP	-1.64092	2.07064	0.0249217	1.47333	-0.753	-1.33043	3.187	-1.62016	-0.361248	-1.49655	-1.08331	-1.53249	1.94678	-1.37441	-0.79222	-1.15718	-1.12207	-0.662148	0.402804	-1.45183	2.68455	1.8873	-1.29147	2.38649	0.40857	-1.62534	-1.65392	1.8247	0.0965826	0.419678	4.30745	-1.45027	3.11518	-1.41896	-0.7093	-1.66395	-0.884943	3.21939	-1.66329	-1.50963	0.483209	2.79935
hsa-miR-4500	-1.39602	-0.0592104	-5.17986	4.83656e-07	1.32598e-06	4.98592	DOWN	0.127491	2.01998	-1.63331	2.5443	-0.753	-1.33043	-1.63632	-1.62016	4.7678	4.42771	4.32749	3.78421	-1.59132	3.9775	-0.79222	4.86379	-1.12207	4.08063	3.06136	-1.45183	3.42183	-1.40413	-1.29147	-1.57603	3.79006	-1.62534	3.15953	1.88247	2.13168	-1.64422	3.15756	4.80581	3.13509	2.40806	4.39519	1.85246	4.89123	-1.66156	3.80973	-1.50963	-1.60817	-1.14451
hsa-miR-4502	1.85926	0.0801688	7.48997	1.4536e-12	7.14268e-12	17.4294	UP	-1.64092	-1.56057	-1.63331	0.23123	-0.753	-1.33043	-1.63632	0.00791739	-0.361248	-1.49655	-1.08331	-1.53249	-1.59132	-1.37441	-0.79222	-1.15718	-1.12207	2.46918	-1.63592	-1.45183	3.6916	-1.67642	-1.29147	-1.57603	-1.66137	-1.62534	-1.65392	-1.57398	3.15953	2.88996	-1.4824	3.70918	-1.61629	-1.41896	-0.7093	1.30743	-0.884943	-1.66156	-1.66329	7.9113	2.51349	-1.14451
hsa-miR-4506	3.06706	1.41845	11.7657	2.40983e-25	3.01523e-24	46.5907	UP	-1.64092	4.77136	-1.63331	-1.6019	3.4713	-1.33043	-1.63632	4.38813	-0.361248	-1.49655	-1.08331	-1.53249	-1.59132	-1.37441	-0.79222	-1.15718	-1.12207	4.27467	-1.63592	1.45453	-1.63778	-0.784609	-1.29147	-1.57603	3.65176	-1.62534	4.34023	3.05715	-1.63472	-1.64422	3.71506	-1.45027	2.76633	-1.41896	-0.7093	4.54526	-0.884943	0.703248	-1.66329	-1.50963	-1.60817	-1.14451
hsa-miR-4507	1.62543	5.62898	10.8307	2.27616e-22	2.35417e-21	39.7825	UP	4.27997	2.69107	4.29952	5.77261	5.90816	5.79527	5.69614	5.14478	4.90225	4.76406	3.23573	4.24811	4.43136	4.36828	4.77721	3.98897	3.89798	5.11713	4.59469	5.45106	5.48829	4.96502	5.65206	5.2542	5.2662	5.42924	5.37447	5.73613	5.18987	5.70189	5.36057	5.60577	4.91886	5.17754	-0.7093	5.5409	3.81843	5.21932	5.16117	4.28183	5.9113	2.54939
hsa-miR-450a-5p	-1.1852	0.584802	-4.23071	3.36156e-05	7.47823e-05	0.904834	DOWN	-1.64092	4.35659	-1.63331	1.21178	-0.753	3.30914	3.35843	-1.62016	4.86969	-1.49655	-1.08331	3.7621	2.84661	-1.37441	4.88323	4.39909	2.98174	-0.0450891	-1.63592	-1.45183	-0.232639	-0.997363	3.0751	-1.57603	-1.00322	0.302309	-0.839983	-1.57398	-0.37187	0.411415	-1.4824	-1.45027	2.5088	1.91952	5.95868	1.52724	-0.884943	2.84856	-0.910165	4.30568	-1.60817	5.16716
hsa-miR-4514	-1.65763	0.874037	-5.95576	9.57846e-09	3.28459e-08	8.80088	DOWN	0.524139	1.49731	-1.63331	2.77628	-0.753	2.57502	3.96448	1.6249	-0.361248	3.51672	-1.08331	-1.53249	0.808789	-1.37441	-0.79222	-1.15718	-1.12207	2.5333	4.54708	-1.45183	3.8263	2.76448	4.12573	3.59254	-1.66137	3.78836	4.42046	2.5088	-1.63472	4.15145	4.6325	5.8489	4.42771	4.21556	-0.7093	2.01421	-0.884943	-1.04128	-0.8949	2.10296	3.07679	-1.14451
hsa-miR-4515	-2.73149	5.70287	-16.818	5.71776e-42	1.76699e-40	84.7114	DOWN	7.31679	8.36271	9.71488	9.23446	7.06565	7.4793	7.9113	7.31679	6.8879	6.75993	6.78104	8.28178	6.67121	6.5529	7.2493	6.57914	7.13781	7.26368	7.04373	7.77076	6.51006	6.03368	5.80161	7.05546	6.96498	6.81292	5.74203	6.70994	6.82289	7.06565	6.90836	7.07717	7.28422	5.80161	5.87065	7.03251	7.64764	6.43899	8.16719	8.19863	6.67121	7.81216
hsa-miR-451a	-5.22814	6.39684	-18.236	1.29823e-46	4.82603e-45	95.3696	DOWN	7.44033	10.3025	8.95476	9.35229	8.47876	9.18815	8.60238	8.8467	10.0451	9.11859	9.00229	10.6977	10.4543	9.84625	9.59648	10.0911	10.6977	9.6861	9.74785	10.136	9.4523	9.16403	9.18815	9.6535	8.74867	9.25687	10.0451	10.3025	8.97867	9.11859	8.86813	10.0451	9.88292	9.00229	9.4523	9.11859	8.39614	6.91907	6.79086	8.01548	8.65844	7.868
hsa-miR-4520-2-3p	-1.64694	0.00706565	-6.35137	1.12331e-09	4.20014e-09	10.8964	DOWN	4.64509	1.85752	5.79527	-1.6019	-0.753	3.14636	2.04744	0.275613	-0.361248	-1.49655	-1.08331	-1.53249	2.38649	3.2471	-0.79222	-1.15718	4.85785	-1.67499	-0.51827	-1.45183	-1.63778	-1.67642	-1.29147	-1.57603	-1.00659	0.65533	1.92176	-1.57398	1.47023	-1.64422	-1.4824	-1.45027	-0.164161	5.99264	5.32442	3.80779	4.06529	4.83422	3.76407	3.22547	-1.60817	4.01677
hsa-miR-4524b-5p	-1.37297	0.630382	-4.79446	2.92418e-06	7.40428e-06	3.24721	DOWN	-1.64092	-1.56057	-1.63331	0.402804	-0.753	-1.33043	1.29488	0.19303	-0.361248	-1.49655	6.26546	4.03615	0.764248	-1.37441	4.65245	4.19748	5.18357	0.497985	4.1848	-1.45183	-1.63778	0.597096	-1.29147	3.70551	3.4713	-1.62534	2.5088	-1.57398	2.8016	2.4432	-1.4824	-1.45027	-1.61629	2.37976	3.89261	-1.66395	-0.884943	4.53586	-0.22203	3.48503	-1.60817	6.29905
hsa-miR-4525	-2.65757	10.0147	-16.0373	2.15676e-39	5.42363e-38	78.7987	DOWN	10.5083	13.3915	13.7162	14.1961	12.4434	10.8153	11.2642	12.2507	12.4434	9.59648	10.9742	12.3088	9.81193	11.8722	9.53519	11.4216	12.037	11.9209	11.9767	11.6381	10.6977	11.7445	8.91046	10.0681	10.9742	10.4227	12.6493	9.9254	10.8153	12.6493	9.6535	13.3043	10.2185	11.4216	8.93129	13.8846	14.1961	10.3402	11.8006	11.6887	10.3402	13.2276
hsa-miR-4528	-1.31946	0.0427567	-4.66709	5.18041e-06	1.2789e-05	2.69665	DOWN	5.26856	-1.56057	2.74543	2.09077	-0.753	-1.33043	-1.63632	-1.62016	-0.361248	3.76843	-1.08331	-1.53249	-1.59132	3.81548	-0.79222	-1.15718	7.30297	-1.04967	-0.22203	5.55209	0.332413	-0.283539	-1.29147	-1.57603	2.82617	-1.62534	3.76407	3.15323	1.3739	2.71882	1.18146	4.28507	1.83204	-1.41896	-0.7093	-0.685709	-0.884943	3.88746	-1.13108	-1.50963	-1.60817	3.54362
hsa-miR-4529-3p	-1.5136	3.27285	-5.91412	1.19371e-08	4.01821e-08	8.58602	DOWN	5.81517	9.9254	4.11309	2.69633	3.80779	3.04843	5.30684	5.6742	-0.361248	3.1706	5.34274	4.7465	4.70927	5.50835	-0.79222	4.63795	5.10337	5.21932	4.3701	4.83805	5.22388	4.93962	7.36533	4.50575	4.57959	4.61624	3.44962	5.25809	4.20982	5.35867	5.10893	5.32017	3.26271	4.98242	-0.7093	4.83233	4.02047	3.0751	5.169	3.63148	5.43427	4.59673
hsa-miR-4529-5p	-2.78588	2.05724	-9.88649	1.91459e-19	1.61543e-18	33.0979	DOWN	-1.64092	3.23967	2.75616	4.97835	-0.753	5.97244	5.51554	4.48908	4.36646	4.05975	6.16939	6.57914	4.62855	2.97336	4.45388	2.74543	3.95618	5.10526	4.62652	5.0314	3.89261	0.99473	4.0689	4.57768	4.10893	1.14168	2.57274	3.60072	1.5485	2.09829	3.52087	-1.45027	5.43427	3.64725	-0.7093	-0.248661	5.33133	0.502948	-1.00659	5.15065	-1.60817	4.8716
hsa-miR-4530	1.57061	9.64669	25.418	7.82625e-69	1.25465e-66	146.351	UP	8.63905	8.39614	8.50457	8.34582	8.62172	9.28104	8.97867	8.51401	8.87866	8.60238	8.86813	8.0583	9.00229	8.97867	8.88919	9.18815	9.21144	9.17609	9.13985	8.95476	8.71606	8.8467	8.93129	9.07314	9.13985	9.00229	9.4016	8.91046	9.11859	9.07314	8.62172	9.09504	9.09504	9.16403	8.86813	9.02374	9.07314	8.88919	9.30392	9.00229	8.6956	9.09504
hsa-miR-4531	-1.90214	1.15409	-6.68653	1.7035e-10	6.94669e-10	12.7452	DOWN	-1.64092	3.6424	4.47655	3.68195	-0.753	4.15899	3.92272	0.609483	-0.361248	-1.49655	5.14678	4.58497	4.27997	2.51349	-0.79222	3.69559	4.67281	1.44863	1.78515	4.03615	4.76406	2.6937	4.47494	4.38248	4.26586	4.15517	3.02397	1.50246	-1.63472	2.36837	2.62325	-1.45027	3.82808	-1.41896	-0.7093	3.66736	-0.884943	-0.397133	0.183704	2.23256	0.839361	6.13301
hsa-miR-4532	-2.84822	12.7347	-29.4379	4.34148e-80	1.85598e-77	172.14	DOWN	14.1961	15.0002	15.0002	12.8165	15.0002	14.1961	15.0002	14.1961	13.7162	15.0002	13.8846	13.8846	13.8846	13.8846	14.1961	12.375	13.8846	13.8846	13.8846	15.0002	15.0002	15.0002	15.0002	15.0002	14.1961	13.8846	13.8846	13.8846	15.0002	14.1961	14.1961	15.0002	13.8846	15.0002	11.6381	15.0002	13.7162	14.1961	15.0002	15.0002	14.1961	14.1961
hsa-miR-4536-5p	-1.47262	-0.403857	-6.03981	6.12257e-09	2.13665e-08	9.23792	DOWN	-1.64092	-1.56057	4.08442	4.1203	-0.753	-1.33043	3.24884	-1.62016	-0.361248	-1.49655	3.83347	2.34264	3.89261	-1.37441	-0.79222	-1.15718	3.86757	-1.10577	-1.63592	1.97666	-1.63778	-1.07937	-1.29147	-1.57603	-1.66137	-1.62534	-1.65392	-1.57398	0.471187	-1.64422	-1.4824	-1.45027	0.764248	-1.41896	-0.7093	-1.66395	-0.884943	-1.66156	-1.66329	3.70551	0.715843	-1.14451
hsa-miR-4540	1.70717	0.529895	6.65679	2.01889e-10	8.14222e-10	12.5785	UP	-1.64092	-1.56057	-1.63331	0.179817	-0.753	-1.33043	-1.63632	1.12516	-0.361248	-1.49655	-1.08331	-1.53249	2.44836	4.5	-0.79222	-1.15718	4.83999	-0.627309	-1.63592	-1.45183	-1.63778	-1.67642	-1.29147	-1.57603	0.84247	-1.62534	1.72357	1.43015	-1.63472	4.93422	-1.4824	-1.45027	-1.61629	-1.41896	-0.7093	-1.66395	-0.884943	-1.66156	-1.66329	-1.50963	-1.60817	-1.14451
hsa-miR-4632-3p	1.29772	3.70522	5.53855	8.28057e-08	2.48417e-07	6.69904	UP	0.241948	3.47367	5.4367	2.86872	5.43913	3.91325	4.35862	4.23469	4.29952	-1.49655	-1.08331	3.30675	3.7621	3.13748	5.66864	2.62325	4.35079	4.22473	5.00986	4.27997	4.39171	4.49633	4.92252	2.96235	4.65996	4.45584	3.44125	2.16924	3.35843	4.0689	4.75455	3.59254	4.88323	4.77547	4.62289	2.87086	5.24986	-0.499252	2.55954	4.11101	4.82126	3.40838
hsa-miR-4633-3p	-3.84198	3.40783	-12.5877	5.22892e-28	7.66411e-27	52.6912	DOWN	4.37763	7.92593	7.53124	8.16719	5.8517	5.32017	6.61151	6.26966	6.36099	4.91886	6.45623	7.50615	5.30897	5.169	6.17688	4.7408	3.54125	5.91445	5.68229	6.87665	6.08705	4.70927	2.57502	5.62477	5.8517	5.83287	4.61624	3.74377	5.18357	4.17023	3.8263	5.2149	-1.61629	-1.41896	-0.7093	5.8517	7.30297	6.14787	5.64663	7.14427	5.24779	6.08705
hsa-miR-4633-5p	-2.59678	2.77167	-10.5734	1.45627e-21	1.40956e-20	37.9394	DOWN	0.951752	4.46838	6.79086	4.65245	5.17754	4.52617	4.17945	0.21273	4.85607	5.01968	4.91455	5.07637	2.85817	3.77986	6.11074	6.09699	7.1997	6.0121	5.28468	5.02336	5.10893	4.84635	3.12659	5.03943	4.99592	5.2149	5.15699	4.28183	5.07022	5.45357	4.73369	5.38841	3.88174	2.72795	3.6424	4.81341	5.75423	-0.439996	5.74203	4.56533	4.22873	3.81167
hsa-miR-4635	-2.84881	4.03843	-14.6626	7.68306e-35	1.56405e-33	68.356	DOWN	6.97687	5.83287	6.83266	7.03251	6.47862	5.38841	6.03368	5.05061	6.43103	5.69614	6.73982	5.83636	6.02673	5.83287	5.79527	5.98924	6.71519	5.96559	6.27788	5.41127	4.90608	5.59787	7.22434	6.74996	5.06672	6.08348	6.36099	5.73111	6.17688	5.73908	5.4434	5.9265	5.36057	5.02547	5.61405	5.12913	4.61993	4.28345	3.83797	5.60834	5.83287	6.26966
hsa-miR-4639-3p	1.09266	1.83901	3.73789	0.000234033	0.000474541	-0.936164	UP	-1.64092	-1.56057	3.6111	-1.6019	-0.753	2.64823	3.81843	1.82205	-0.361248	3.71929	3.77244	3.053	-1.59132	-1.37441	-0.79222	-1.15718	-1.12207	2.24885	-0.292543	4.6691	4.96071	2.30183	4.35456	-1.57603	3.80007	5.03943	-0.179207	4.15899	-1.63472	3.53429	3.2734	2.65603	3.55067	-1.41896	-0.7093	4.14538	-0.884943	2.38649	-1.66329	-1.50963	1.41789	-1.14451
hsa-miR-4644	1.33057	0.0960604	5.58802	6.44892e-08	1.96221e-07	6.94222	UP	0.386657	-1.56057	-1.63331	-1.6019	-0.753	-1.33043	-1.63632	-1.62016	-0.361248	-1.49655	-1.08331	-1.53249	-1.59132	-1.37441	-0.79222	-1.15718	-1.12207	0.536643	-1.63592	-1.45183	1.08152	0.291774	-1.29147	-1.57603	3.0751	-1.62534	-1.65392	3.59254	-1.63472	-1.64422	-1.4824	-1.45027	1.8247	-1.41896	-0.7093	-1.66395	-0.884943	-1.66156	-1.66329	-1.50963	0.402804	-1.14451
hsa-miR-4645-3p	1.00962	0.193669	3.61635	0.000366938	0.000718471	-1.35932	UP	-1.64092	-1.56057	1.06997	-1.6019	-0.753	-1.33043	2.86016	-1.62016	-0.361248	-1.49655	-1.08331	-1.53249	1.87381	-1.37441	-0.79222	-1.15718	2.84071	-1.67499	-1.63592	-1.45183	-1.63778	-0.4035	-1.29147	-1.57603	-1.66137	-1.62534	-1.65392	-1.57398	-1.63472	-1.64422	-1.4824	-1.45027	0.262087	5.42476	-0.7093	-1.66395	-0.884943	4.80386	-1.66329	-1.50963	-1.60817	-1.14451
hsa-miR-4646-3p	1.09254	4.52653	6.07788	4.99196e-09	1.75884e-08	9.43738	UP	4.65996	2.69633	4.65996	-1.6019	4.88323	3.25453	4.81147	4.35456	5.43913	5.55993	5.39783	2.35314	3.20369	3.56173	4.16637	4.71645	5.15252	2.2162	5.36057	5.70189	5.14283	4.20255	4.70739	4.60848	5.60834	5.32017	4.77547	5.10709	5.26021	5.25809	5.03943	4.39171	3.15323	3.2377	-0.7093	3.50159	5.37447	3.88174	4.74443	4.9377	4.88135	-1.14451
hsa-miR-4647	1.76487	-0.116785	8.00361	5.87868e-14	3.28515e-13	20.5929	UP	-0.191865	-1.56057	-1.63331	-1.6019	-0.753	-1.33043	-0.361248	-1.62016	-0.361248	-1.49655	-1.08331	-1.53249	-1.59132	-1.37441	-0.79222	-1.15718	-1.12207	-0.391343	-1.63592	-1.45183	2.34647	-1.67642	-1.29147	-1.57603	-1.66137	-1.62534	2.03073	-1.57398	-1.63472	0.873235	-1.4824	-1.45027	0.203074	-1.41896	-0.7093	-1.66395	-0.884943	-1.66156	-1.66329	-1.50963	-1.60817	-1.14451
hsa-miR-4648	4.39756	3.49218	16.6313	2.35698e-41	6.87007e-40	83.2998	UP	0.144357	5.70775	1.29488	-1.6019	4.05054	-1.33043	-1.63632	2.19389	5.00389	-1.49655	-1.08331	-1.53249	3.12659	3.9303	5.08975	4.81341	-1.12207	2.27458	-1.63592	2.96661	-0.511787	1.0872	2.91367	4.57035	2.43923	0.736457	2.47993	1.46713	2.05373	3.10285	2.67202	1.74602	2.69107	-1.41896	-0.7093	1.68078	3.28687	-1.66156	3.88174	2.27458	3.20002	-1.14451
hsa-miR-4649-3p	1.56843	3.38207	6.94251	3.87035e-11	1.6741e-10	14.2003	UP	4.80007	-1.56057	3.64725	4.04137	-0.753	-1.33043	4.15899	3.01747	4.98635	-1.49655	-1.08331	2.714	2.57046	5.28468	5.59787	3.54362	5.75423	4.48196	2.00799	3.17952	3.94113	4.3112	2.72795	3.12178	4.11309	3.24299	4.47655	5.38841	2.61561	4.68177	4.41309	5.2775	2.99727	2.51893	5.31109	2.25567	4.51115	3.02397	3.87279	3.33253	4.5489	-1.14451
hsa-miR-4650-3p	-1.19028	1.00475	-3.88465	0.0001339	0.000280598	-0.408757	DOWN	3.75001	1.23723	4.38248	-1.6019	-0.753	2.88446	4.19573	-1.62016	4.48196	3.29069	5.88274	6.32408	4.73713	4.07867	-0.79222	4.11671	3.187	3.82233	-1.63592	4.05054	0.715843	3.07272	3.4623	4.57409	4.79822	2.67202	1.69239	-1.57398	4.62289	-1.64422	4.68938	-1.45027	-1.61629	-1.41896	-0.7093	-1.66395	-0.884943	-1.66156	5.36288	-1.50963	3.4989	4.24616
hsa-miR-4652-5p	-4.45419	3.79081	-18.3452	5.73266e-47	2.22792e-45	96.1844	DOWN	5.27523	7.95389	6.64345	5.53804	4.86777	4.62652	7.35223	6.97687	6.54858	5.05699	7.40263	8.65844	5.07637	6.35197	4.99997	5.14877	8.02207	6.08348	5.66297	6.1037	6.5013	5.6742	3.67564	5.08603	5.69614	7.15072	6.38641	3.75815	5.04128	6.35197	4.42771	6.63407	2.84071	5.51554	-0.7093	6.11074	6.48333	3.62793	5.96559	5.84298	5.72238	7.53124
hsa-miR-4653-3p	2.42957	0.371644	9.73299	5.60036e-19	4.54586e-18	32.0335	UP	-1.64092	5.59787	-1.63331	-1.6019	-0.753	-1.33043	-1.63632	3.13987	-0.361248	-1.49655	-1.08331	-1.53249	-1.59132	-1.37441	-0.79222	-1.15718	-1.12207	-1.67499	-1.63592	-1.45183	0.444374	-1.67642	-1.29147	-1.57603	-1.66137	-1.62534	-1.65392	-1.57398	-1.63472	-0.254783	-1.4824	-1.45027	-1.61629	-1.41896	-0.7093	1.53316	-0.884943	1.1749	-1.66329	-1.50963	-1.60817	-1.14451
hsa-miR-4654	1.44721	2.48056	5.23311	3.74193e-07	1.04554e-06	5.23457	UP	1.5302	0.793539	3.07679	2.36837	-0.753	4.35456	1.15355	-1.62016	-0.361248	3.45834	3.15756	-1.53249	2.55384	-1.37441	-0.79222	-1.15718	-1.12207	-0.164161	3.83797	-1.45183	3.10067	2.90422	4.01313	3.14636	3.76013	3.26592	4.75268	1.66883	2.93589	3.02598	4.36828	3.55067	4.12217	-1.41896	-0.7093	3.90356	-0.884943	3.18535	4.85963	-1.50963	4.34023	-1.14451
hsa-miR-4658	-2.36992	3.03542	-9.31758	9.88087e-18	7.43238e-17	29.1887	DOWN	5.22825	5.20867	4.67648	7.31679	4.9728	5.32916	2.01998	4.88323	5.91445	1.53316	5.01773	5.27092	5.90175	5.32017	5.08975	5.95868	4.61624	5.31574	5.54611	4.6066	4.6247	5.32017	2.28895	4.1683	5.20251	5.29597	5.42924	3.97192	4.70739	5.06672	4.46508	5.53518	4.00761	-1.41896	3.55759	4.5299	4.57409	2.13374	4.06529	3.89441	5.32017	3.41286
hsa-miR-4659a-3p	-1.19094	0.016995	-4.38019	1.79954e-05	4.16966e-05	1.50193	DOWN	2.80605	-1.56057	-1.63331	4.39909	-0.753	3.3799	-0.0530304	-1.62016	5.09971	3.70363	-1.08331	-1.53249	-1.59132	2.84269	-0.79222	-1.15718	-1.12207	4.75455	4.16071	-1.45183	-1.63778	0.23627	-1.29147	-1.57603	-1.66137	-0.0140261	1.9492	-1.57398	-1.63472	0.685339	-1.4824	-1.45027	3.23165	-1.41896	-0.7093	-1.66395	-0.884943	-1.66156	-1.66329	3.17748	3.65738	3.67564
hsa-miR-466	1.93233	0.666732	7.32359	4.00309e-12	1.87371e-11	16.4318	UP	5.36518	-1.56057	2.12477	3.37748	-0.753	-1.33043	0.0593174	2.42082	-0.361248	-1.49655	-1.08331	-1.53249	-1.59132	-1.37441	-0.79222	-1.15718	-1.12207	0.715843	-1.63592	-1.45183	-1.63778	2.2835	2.2775	-1.57603	2.19659	-1.62534	-0.668952	-1.57398	-1.63472	1.16773	1.42763	2.61796	-1.61629	3.26271	-0.7093	3.17952	-0.884943	4.03791	2.2231	-1.50963	-1.60817	-1.14451
hsa-miR-4663	-3.59299	4.02467	-14.6155	1.1003e-34	2.20489e-33	67.9982	DOWN	1.91512	7.53124	6.76513	6.73982	4.75268	4.34896	7.16926	6.84282	6.66236	5.48567	7.96913	8.19863	5.21276	6.82289	5.68502	4.72972	8.29854	5.56246	5.48829	6.48333	6.68167	5.85785	2.36632	5.9384	5.42476	7.27766	6.22219	5.28692	5.38841	6.62948	5.2913	6.83266	4.23262	6.03368	4.25593	6.02294	5.55209	3.57552	4.55472	5.70775	4.59265	4.77896
hsa-miR-4666a-3p	-1.10377	-0.0903275	-3.99883	8.57261e-05	0.000184006	0.0138944	DOWN	1.28214	-1.56057	2.78981	-1.6019	4.30745	-1.33043	-1.63632	1.54313	4.1397	1.43831	-1.08331	2.03519	2.4432	4.1149	5.01968	-1.15718	2.69107	1.05752	3.01747	-1.45183	-1.63778	-1.67642	4.17757	-1.57603	-1.66137	-1.62534	4.58497	-1.57398	2.96661	-1.64422	-1.4824	-1.45027	-1.61629	4.67093	-0.7093	-1.66395	6.31169	0.344304	-1.66329	4.73896	4.1149	-1.14451
hsa-miR-4666a-5p	-3.07678	0.950392	-10.8283	2.31708e-22	2.38687e-21	39.7648	DOWN	-1.64092	1.55372	4.15517	5.56735	5.91445	4.36253	4.40594	4.90417	5.22825	3.032	5.57009	7.00951	-1.59132	3.47832	-0.79222	2.77853	6.71519	-0.181974	5.04128	5.23433	6.06192	3.41973	3.50427	-1.57603	4.30392	5.40689	3.58621	4.69666	2.00561	4.46838	4.44834	4.14713	2.7052	-1.41896	-0.7093	1.48542	-0.884943	-0.196435	-1.66329	-1.50963	4.51463	-1.14451
hsa-miR-4667-5p	1.10548	6.1752	8.69433	6.60207e-16	4.35329e-15	25.029	UP	4.85201	4.18306	5.73111	-1.6019	5.00389	5.08603	5.80852	6.43103	6.14787	6.12597	5.92936	4.67468	5.0818	5.62477	5.42924	5.27092	4.5489	5.67142	6.54426	6.22219	6.11074	6.06192	6.16198	6.41283	6.20004	6.47391	6.02673	5.19608	6.5529	6.22958	6.47391	6.5013	6.16198	5.82125	5.71355	5.97244	6.32009	6.58783	6.11798	6.5189	5.27977	4.71821
hsa-miR-4668-5p	-1.01742	-0.438916	-4.23685	3.2774e-05	7.31002e-05	0.929027	DOWN	-1.64092	2.89395	-1.63331	-1.6019	-0.753	-1.33043	2.63111	-1.62016	-0.361248	-1.49655	-1.08331	4.08613	-1.59132	-1.37441	-0.79222	-1.15718	2.74067	3.1445	1.38479	3.58418	-1.63778	1.06385	-1.29147	2.43383	-1.66137	-1.62534	0.976035	3.55067	3.37149	-1.64422	-1.4824	-1.45027	3.21126	-1.41896	-0.7093	0.101917	-0.884943	-1.66156	0.195567	3.98505	-1.60817	3.34105
hsa-miR-4669	1.96726	2.31754	7.07109	1.81487e-11	8.13834e-11	14.9447	UP	-1.64092	-1.56057	4.04306	-1.6019	-0.753	-1.33043	4.17201	-1.62016	-0.361248	1.89233	5.0076	4.20441	3.96013	-1.37441	-0.79222	4.06529	-1.12207	2.89395	0.495617	-1.45183	1.80332	0.19303	-1.29147	1.71448	-1.66137	1.10787	2.68237	1.40669	0.439196	-1.64422	3.99993	3.43085	2.48213	-1.41896	-0.7093	0.640874	-0.884943	-1.66156	1.70152	2.34455	-1.60817	3.25896
hsa-miR-4670-3p	-1.31309	-0.112413	-4.57138	7.90052e-06	1.89974e-05	2.29106	DOWN	-0.334165	-1.56057	5.07022	-1.6019	7.48583	-1.33043	-1.63632	-1.62016	4.26405	-1.49655	4.71821	4.35079	3.59647	8.46354	3.52452	5.08975	-1.12207	-1.67499	5.13694	3.2734	3.50427	-0.679843	3.15323	-1.57603	0.700052	2.37976	3.24504	-1.57398	3.42626	0.591513	1.1749	5.58763	-1.61629	-1.41896	-0.7093	2.66059	4.36646	-1.66156	3.21939	2.81487	5.25614	-1.14451
hsa-miR-4676-5p	1.10441	0.381042	4.00413	8.39496e-05	0.000180344	0.0337711	UP	-1.64092	0.926826	-1.63331	0.985915	-0.753	-1.33043	1.65189	1.20081	-0.361248	-1.49655	-1.08331	-1.53249	-1.59132	-1.37441	-0.79222	-1.15718	-1.12207	3.75815	-1.63592	-1.45183	-1.63778	0.892922	-1.29147	-1.57603	1.33398	0.873235	-1.65392	-1.57398	-1.63472	3.17952	-1.4824	-1.45027	-1.61629	3.30161	-0.7093	2.42082	-0.884943	0.551326	-1.66329	-1.50963	3.56606	-1.14451
hsa-miR-4677-3p	-1.23048	-0.503123	-5.55312	7.69377e-08	2.32171e-07	6.77052	DOWN	3.64483	2.67792	1.3279	2.45891	-0.753	-1.33043	-1.63632	3.20917	-0.361248	4.18306	-1.08331	2.81717	3.6089	-1.37441	-0.79222	-1.15718	-1.12207	-1.67499	3.67999	-1.45183	-1.63778	1.13847	-1.29147	2.84856	1.14168	1.3739	-0.826322	1.55372	1.86447	-0.232639	-1.4824	1.8247	-1.61629	-1.41896	-0.7093	-1.66395	-0.884943	-1.66156	-1.66329	-1.50963	0.302309	4.14363
hsa-miR-4679	-1.10355	-0.197455	-4.04515	7.13351e-05	0.000154019	0.188412	DOWN	4.44466	2.75019	-1.63331	3.5486	-0.753	-1.33043	-0.0858261	-0.219291	-0.361248	-1.49655	-1.08331	3.53658	-1.59132	-1.37441	-0.79222	-1.15718	4.7465	-1.67499	4.38611	-1.45183	-1.63778	-0.341174	-1.29147	-1.57603	-1.66137	-1.62534	0.695926	1.21911	-1.63472	-1.64422	2.09581	-1.45027	3.55067	6.58783	-0.7093	-1.66395	-0.884943	2.02384	-1.66329	2.14947	3.65738	2.84466
hsa-miR-4680-3p	-1.15066	-0.313262	-4.38273	1.78033e-05	4.12887e-05	1.5122	DOWN	-0.398935	-1.56057	3.90534	-1.6019	-0.753	-1.33043	-1.63632	-1.62016	-0.361248	-1.49655	-1.08331	5.31109	-1.59132	-1.37441	4.62652	-1.15718	-1.12207	1.47925	4.69114	-1.45183	2.7302	-1.67642	-1.29147	1.56808	0.489909	-1.62534	3.7282	-1.57398	-1.63472	4.24421	4.04306	1.54581	1.24412	2.35773	-0.7093	-1.66395	5.34027	-1.66156	1.79243	-1.50963	10.0451	-1.14451
hsa-miR-4681	1.54362	0.85275	5.9522	9.76105e-09	3.33828e-08	8.78245	UP	3.21939	-1.56057	3.55274	-1.6019	-0.753	-1.33043	2.72795	3.4561	-0.361248	-1.49655	-1.08331	2.3891	3.92628	-1.37441	-0.79222	-1.15718	-1.12207	-1.67499	2.89822	-1.45183	-1.63778	-1.58086	-1.29147	-1.57603	-1.66137	-1.62534	1.86014	-1.57398	0.821593	0.983343	-1.4824	-1.45027	-1.61629	4.97632	-0.7093	-0.4035	3.12864	3.09858	2.10296	-1.50963	-1.60817	-1.14451
hsa-miR-4682	2.71552	1.92936	11.0409	4.94945e-23	5.35668e-22	41.2982	UP	1.78515	-1.56057	-1.63331	-1.6019	-0.753	-1.33043	-0.414222	-1.62016	-0.361248	-1.49655	-1.08331	-1.53249	-1.59132	-1.37441	-0.79222	-1.15718	-1.12207	-1.67499	2.39614	-1.45183	1.47925	-1.67642	-1.29147	2.83653	1.6607	1.93943	-0.639139	4.06529	2.18109	3.64725	2.98375	-1.45027	4.07277	-1.41896	-0.7093	0.926826	-0.884943	-0.8673	1.5089	-1.50963	4.02863	-1.14451
hsa-miR-4684-3p	1.57483	2.00233	5.25356	3.38902e-07	9.52119e-07	5.3306	UP	-1.64092	-1.56057	-1.63331	1.12166	-0.753	4.90824	2.78981	0.00253478	-0.361248	3.96828	-1.08331	-1.53249	1.52047	-1.37441	-0.79222	-1.15718	3.60464	2.09829	0.731387	2.54939	1.04186	-0.768404	4.32213	1.55629	0.190433	4.5299	4.05975	3.28491	2.02624	1.31294	-1.4824	-1.45027	3.61803	2.24219	-0.7093	4.5	-0.884943	3.69559	3.04332	4.40594	-1.60817	-1.14451
hsa-miR-4685-3p	1.86386	4.19166	7.73664	3.16097e-13	1.6554e-12	18.9333	UP	5.10337	-1.56057	6.19228	-1.6019	4.07277	2.12962	5.52078	4.79822	-0.361248	2.9063	4.0265	4.1274	1.42511	2.78733	4.41663	-1.15718	3.63781	4.68938	4.62289	5.37447	5.00389	4.60288	5.02547	3.44962	4.09591	4.5339	4.75642	5.2149	5.26021	3.29254	5.34274	4.97456	5.64091	5.95868	-0.7093	5.18774	4.73713	3.14822	4.92069	3.2772	5.64935	-1.14451
hsa-miR-4686	1.54001	0.554901	5.72706	3.1671e-08	1.00579e-07	7.63458	UP	-1.64092	-1.56057	-1.63331	-1.6019	-0.753	-1.33043	-1.63632	-1.62016	-0.361248	-1.49655	-1.08331	3.08366	-1.59132	-1.37441	-0.79222	-1.15718	3.79176	0.309707	3.57026	-1.45183	1.58973	3.95435	-1.29147	-1.57603	2.36632	3.87995	-0.0858261	2.90838	3.56606	-1.64422	3.46708	-1.45027	4.5339	-1.41896	-0.7093	-1.66395	-0.884943	-0.526717	-1.66329	-1.50963	2.63375	-1.14451
hsa-miR-4691-3p	-1.31939	-0.183649	-5.40234	1.63478e-07	4.75422e-07	6.03801	DOWN	-1.64092	-1.56057	-0.485496	1.28214	-0.753	4.76406	3.73546	-1.62016	-0.361248	3.39241	4.68003	-1.53249	-1.59132	4.23676	-0.79222	-1.15718	4.69478	-1.67499	2.59491	-1.45183	0.539611	0.269111	-1.29147	-1.57603	-0.768404	1.18146	-1.65392	0.4497	0.031387	-1.64422	-1.4824	-1.45027	2.94675	-1.41896	-0.7093	0.635552	-0.884943	0.597096	-0.839983	3.16151	0.4497	-1.14451
hsa-miR-4693-3p	-1.30172	-0.756128	-6.35629	1.09315e-09	4.09931e-09	10.923	DOWN	-1.64092	-1.56057	0.66013	3.48906	-0.753	5.20251	4.27639	-1.62016	-0.361248	-1.49655	5.24779	2.67202	-1.59132	-1.37441	-0.79222	-1.15718	-1.12207	0.319241	-1.63592	3.78421	-1.63778	-1.61629	-1.29147	-1.57603	-0.613578	-1.62534	1.17132	-1.57398	-1.63472	0.860504	-1.4824	-1.45027	3.11518	-1.41896	-0.7093	-1.66395	-0.884943	-1.66156	-0.830043	1.69239	-1.60817	4.44466
hsa-miR-4693-5p	-1.15058	-0.574086	-5.26389	3.22334e-07	9.07559e-07	5.3792	DOWN	-1.64092	0.722352	0.635552	-1.6019	3.85604	-1.33043	1.69239	-1.62016	-0.361248	-1.49655	3.01972	-1.53249	-1.59132	-1.37441	-0.79222	-1.15718	4.92252	2.82397	1.84317	-1.45183	-1.63778	3.053	-1.29147	-1.57603	3.69359	-1.62534	-0.781857	-1.57398	-1.63472	2.92981	-1.4824	-1.45027	5.00193	-1.41896	-0.7093	-1.66395	-0.884943	2.45891	-1.66329	-1.50963	-1.60817	4.08442
hsa-miR-4695-3p	1.32344	4.5934	7.3605	3.20106e-12	1.51489e-11	16.6519	UP	3.6089	2.56445	5.0314	4.60103	4.83611	3.2734	4.72972	4.29573	4.63442	4.39345	3.0751	2.83197	5.6032	3.70363	5.69342	3.05925	-1.12207	4.60103	4.14167	4.52803	4.51463	4.72214	5.37447	5.21062	4.35659	4.88901	2.66507	5.30057	5.70775	3.96448	5.59787	4.42444	3.57981	-1.41896	-0.7093	4.39171	-0.884943	4.82126	5.31109	5.07022	5.38841	-1.14451
hsa-miR-4696	-1.42471	-0.723821	-7.22444	7.27477e-12	3.35005e-11	15.8439	DOWN	-1.64092	-1.56057	-1.63331	3.68195	-0.753	-1.33043	1.36244	0.825113	-0.361248	-1.49655	3.81548	0.839361	0.386657	-1.37441	-0.79222	-1.15718	-1.12207	-1.67499	2.31347	-1.45183	-1.63778	2.21867	-1.29147	-1.57603	0.873235	-1.62534	-1.65392	-1.57398	-1.63472	-1.64422	-1.4824	-1.45027	1.80332	-1.41896	-0.7093	-0.830043	-0.884943	3.53658	-1.66329	2.714	-1.60817	-1.14451
hsa-miR-4698	1.21336	4.02912	5.03916	9.44046e-07	2.51713e-06	4.33864	UP	1.13527	4.75642	3.05715	-1.6019	-0.753	2.23036	2.85313	5.36288	-0.361248	4.53943	-1.08331	3.61566	4.00557	-1.37441	4.18132	-1.15718	3.36727	4.1848	4.77547	5.44127	4.53586	4.33671	3.81695	3.4032	4.55472	3.84144	2.68237	5.18357	4.88679	4.43136	4.83233	4.17023	0.0659652	3.29647	-0.7093	5.71355	-0.884943	5.39783	5.14478	4.5869	4.92646	2.74067
hsa-miR-4700-3p	1.12066	3.91856	4.9801	1.24496e-06	3.26515e-06	4.0712	UP	2.57046	5.65764	5.04873	3.13987	5.18151	3.73756	4.64509	4.62141	4.32584	-1.49655	4.75642	-1.53249	2.72572	2.63887	4.42444	-1.15718	2.93285	3.57767	4.24049	4.59265	3.90711	4.27811	4.15899	2.90422	4.55472	2.63375	4.36253	4.02437	5.86461	2.83197	3.25896	-1.45027	4.37395	5.59787	-0.7093	3.77428	5.0076	3.66736	4.9728	6.54048	4.7908	-1.14451
hsa-miR-4700-5p	-2.19774	2.74888	-7.81965	1.87989e-13	1.00877e-12	19.4458	DOWN	-1.64092	4.06339	4.73896	4.79251	-0.753	6.29462	5.04312	3.54611	-0.361248	3.42183	6.09062	4.71821	4.86777	-1.37441	4.62289	3.96448	4.79251	4.41143	5.88878	4.32213	4.99404	4.57768	5.27307	4.82126	4.21742	3.52452	4.42607	3.55966	2.67202	3.59647	3.95618	4.70033	4.89123	3.4032	-0.7093	4.33301	5.63807	1.29488	3.89621	5.2913	3.71929	6.03977
hsa-miR-4701-3p	2.01305	1.59963	6.78239	9.81988e-11	4.08233e-10	13.2858	UP	3.187	0.825113	1.23723	-1.6019	-0.753	-1.33043	3.96828	0.297787	-0.361248	-1.49655	4.55091	-1.53249	3.53429	-1.37441	-0.79222	-1.15718	-1.12207	-0.0450891	-1.63592	-1.45183	-0.283539	2.55669	-1.29147	2.95302	7.40263	1.12516	4.19177	-1.57398	1.12867	2.80826	-1.4824	-1.45027	2.63375	4.75642	4.00557	0.262087	-0.884943	3.30161	-1.66329	3.49118	-1.60817	-1.14451
hsa-miR-4701-5p	1.1489	4.15797	6.3457	1.15908e-09	4.32758e-09	10.8657	UP	5.6032	-1.56057	4.06339	4.18646	5.65764	3.89976	4.87536	2.33266	-0.361248	1.30743	-1.08331	5.06272	0.394524	3.61803	-0.79222	4.77136	4.8286	0.985915	3.44125	4.97456	4.20089	4.49081	3.83797	2.61083	3.05507	3.8057	4.38408	4.95715	0.131809	3.56173	2.11328	3.0386	3.9701	5.56735	5.04686	4.52617	3.99993	4.1397	5.24986	2.90043	-1.60817	4.344
hsa-miR-4704-3p	-1.49558	0.15661	-5.42508	1.4605e-07	4.30101e-07	6.1475	DOWN	4.77547	2.29651	2.29957	0.757757	-0.753	-1.33043	-1.63632	2.15987	-0.361248	-1.49655	-1.08331	4.92252	3.50427	4.14363	-0.79222	4.91886	2.63375	4.03054	-1.63592	-1.45183	1.49141	3.3373	2.66507	4.50575	2.48483	3.76407	2.01421	1.06997	-1.63472	3.01176	3.69958	2.6889	-1.61629	2.85817	3.79176	-1.66395	-0.884943	-0.900178	-0.21117	-1.50963	-1.60817	4.10432
hsa-miR-4705	-1.47215	-0.440312	-6.44476	6.68355e-10	2.53599e-09	11.4049	DOWN	-1.64092	4.41143	1.57093	3.25453	-0.753	3.053	4.07867	2.27458	4.80192	-1.49655	-1.08331	2.91103	0.355809	-1.37441	-0.79222	2.80826	3.67369	-1.14451	3.71718	2.67792	0.352935	-1.51065	-1.29147	-1.57603	-1.66137	-1.62534	-1.65392	0.983343	-1.63472	-1.64422	2.22563	-1.45027	1.28821	-1.41896	-0.7093	-0.411	-0.884943	-1.66156	3.58824	1.79243	-1.60817	5.87065
hsa-miR-4708-3p	-2.613	7.21583	-17.502	3.23762e-44	1.0927e-42	89.8684	DOWN	7.50615	9.96219	9.9254	9.88292	7.93993	8.34582	9.47975	8.13403	7.88185	8.01548	9.47975	10.3849	8.49513	7.31679	8.20642	8.58256	9.74785	8.39614	8.97867	8.93129	9.28104	7.17558	7.61042	8.19863	7.82565	8.28178	7.1997	8.07172	7.71619	7.55832	8.07172	7.92593	8.36271	5.41356	7.39062	8.86813	11.6887	8.67584	8.02865	9.28104	7.66116	9.6535
hsa-miR-4710	-1.83265	7.09879	-10.7413	4.34631e-22	4.3548e-21	39.1401	DOWN	7.83912	9.62635	10.3025	9.6861	7.9113	6.52722	9.02374	8.67584	8.46354	6.954	7.12574	7.61042	7.37779	7.81216	5.90175	6.73041	7.64764	7.82565	8.28178	7.66116	6.97687	7.44033	5.73111	7.62351	7.8526	8.10339	8.19863	7.36533	8.16719	8.34582	6.69116	9.23446	7.55832	7.4793	5.51816	8.01548	9.9254	7.73003	8.2142	8.78166	6.92436	8.73805
hsa-miR-4713-3p	-1.66044	2.35098	-6.37929	9.623e-10	3.61921e-09	11.0478	DOWN	4.84635	2.93285	2.62847	4.17201	5.03547	2.97524	2.45378	0.906474	-0.361248	5.09332	2.90422	4.89853	3.44752	2.83197	4.50381	4.49633	5.81517	4.59074	3.6089	3.76843	4.7408	4.12405	4.36646	4.44634	3.95049	4.82126	3.92272	2.33021	1.98883	4.66352	4.61198	2.76633	5.33351	4.32584	5.9384	5.04312	4.90608	2.98749	1.06997	3.76843	-1.60817	-1.14451
hsa-miR-4713-5p	1.38069	4.00249	5.93954	1.04375e-08	3.54597e-08	8.71705	UP	3.66955	5.47857	3.89621	-1.6019	3.7016	4.33671	5.48305	5.01212	-0.361248	4.56694	-1.08331	-1.53249	3.29254	-1.37441	-0.79222	-1.15718	-1.12207	3.86934	5.3701	4.14363	4.89312	5.23887	4.84843	5.12123	4.80192	4.52252	3.55067	5.22607	2.13949	2.41435	4.15899	3.20369	4.19375	3.65176	-0.7093	1.07899	-0.884943	5.40689	4.19923	2.50049	4.70561	-1.14451
hsa-miR-4714-5p	1.95575	1.83324	7.35263	3.35759e-12	1.58604e-11	16.6049	UP	3.91911	2.00799	-0.20677	3.66287	-0.753	-1.33043	-1.63632	-1.62016	4.32914	-1.49655	-1.08331	-1.53249	4.51115	-1.37441	3.81695	-1.15718	-1.12207	-1.67499	5.26856	2.18109	2.44121	0.926826	-1.29147	3.31154	-0.482824	2.23493	-1.65392	4.04706	1.27578	3.91911	-1.4824	2.84071	-1.61629	2.62847	5.28915	-0.124609	4.7827	-1.66156	3.23967	2.87086	3.00988	2.59223
hsa-miR-4716-3p	1.92386	2.88135	7.0122	2.57007e-11	1.12688e-10	14.6026	UP	4.19573	4.22673	-1.63331	-1.6019	-0.753	4.01313	0.553917	4.31856	-0.361248	2.3751	-1.08331	-1.53249	-1.59132	2.87307	4.28898	5.5781	-1.12207	4.96502	-1.63592	2.76263	0.252383	2.81717	2.98749	3.35015	3.61566	4.66726	3.53429	5.05061	5.04128	4.49254	-1.4824	3.7959	2.70088	-1.41896	3.7282	4.92646	-0.884943	3.89261	2.81717	5.44597	3.70739	-1.14451
hsa-miR-4716-5p	1.21434	4.54804	5.64996	4.70506e-08	1.45755e-07	7.24908	UP	3.90711	3.03438	4.67093	0.536643	-0.753	5.23887	4.61023	3.68392	6.03368	2.79452	-1.08331	2.04253	2.76448	5.14478	4.59888	3.51672	-1.12207	4.1341	4.87536	4.30933	4.90039	4.34713	5.69069	5.90816	5.87065	5.24986	4.69289	5.23887	3.3373	5.09153	5.2413	4.38248	5.4634	-1.41896	5.07453	4.62141	3.9831	5.10526	5.23644	-1.50963	4.5186	-1.14451
hsa-miR-4717-3p	2.07121	3.35848	8.04083	4.63827e-14	2.60903e-13	20.8268	UP	0.988487	4.26767	5.37447	-1.6019	-0.753	-1.33043	0.0720478	3.1957	-0.361248	3.50427	-1.08331	-1.53249	-1.59132	2.58325	3.51672	-1.15718	-1.12207	4.60472	2.49239	-1.45183	2.97973	4.58883	5.27307	2.72349	3.08106	3.1554	4.01495	5.03943	4.1397	4.76227	5.22388	4.72214	1.39618	1.68748	-0.7093	4.71821	-0.884943	3.58418	4.094	4.15331	4.48196	-1.14451
hsa-miR-4718	-3.28118	7.02217	-16.8147	5.86318e-42	1.79036e-40	84.6864	DOWN	8.04255	9.81193	10.5257	9.4016	8.56592	7.93993	8.7593	8.2142	8.54948	8.73805	8.88919	10.9346	8.67584	8.04255	8.20642	8.56592	10.5955	9.21144	8.6956	9.21144	9.25687	7.78486	7.63577	8.41383	8.19863	8.91046	8.0583	8.37758	7.99923	8.43012	8.37758	8.82378	8.58256	7.44033	7.50615	8.10339	8.88919	8.2649	10.0911	9.42722	7.50615	9.53519
hsa-miR-4719	-1.60191	-0.314366	-6.64431	2.16779e-10	8.70169e-10	12.5087	DOWN	-1.64092	-1.56057	-1.63331	-1.6019	-0.753	2.97147	3.20539	1.81372	-0.361248	-1.49655	4.92069	3.5188	1.63113	-1.37441	-0.79222	-1.15718	-1.12207	-0.0980609	2.45378	-1.45183	3.72132	-1.67642	3.65549	1.91512	-0.30788	0.297787	-1.65392	-1.57398	0.0565565	-1.64422	-1.4824	-1.45027	4.20982	-1.41896	-0.7093	-1.66395	-0.884943	-1.66156	-1.66329	-1.50963	-1.60817	5.2662
hsa-miR-4722-3p	2.24898	3.59274	8.90806	1.58644e-16	1.11792e-15	26.4398	UP	4.344	4.8716	4.0265	-1.6019	-0.753	3.2471	3.75415	4.22114	-0.361248	2.1105	-1.08331	5.82705	1.88247	2.88624	-0.79222	-1.15718	-1.12207	4.42607	2.73438	1.34849	4.25173	4.435	2.58	2.03519	4.15517	4.56186	3.97192	4.37203	5.12123	5.05699	4.55091	4.40594	0.300048	-1.41896	-0.7093	0.962887	-0.884943	4.62652	4.76406	3.42183	3.63148	-1.14451
hsa-miR-4723-3p	1.26057	4.49208	6.10715	4.26451e-09	1.52346e-08	9.5913	UP	5.15699	2.90233	2.61326	5.16117	4.25173	4.91671	4.55293	5.44855	4.41309	4.81928	4.5	1.23723	4.44834	4.78681	5.06079	-1.15718	-1.12207	4.6858	4.93422	3.51274	5.32017	4.91455	5.31574	5.49702	5.13694	4.7827	5.30265	5.88878	5.36288	4.62289	5.55209	4.75268	4.85201	5.25809	-0.7093	5.22825	5.65764	3.71098	5.10337	4.08997	4.36449	3.60072
hsa-miR-4724-3p	-2.17246	1.33117	-7.73657	3.16236e-13	1.6554e-12	18.9328	DOWN	5.00389	2.2775	2.16924	5.30684	-0.753	3.8601	4.44298	1.6364	-0.361248	2.75019	5.13128	6.00583	4.50381	3.41764	-0.79222	5.19835	3.29647	5.49049	3.02197	4.8286	3.09649	3.56606	-1.29147	4.14713	4.99997	0.149252	3.48282	4.45388	4.94937	3.5486	-1.4824	4.85963	-1.61629	4.16242	-0.7093	4.42046	-0.884943	-0.954639	0.436335	2.94675	3.28491	5.38365
hsa-miR-4727-3p	-2.56181	5.31186	-18.4288	3.06583e-47	1.22873e-45	96.8083	DOWN	6.33574	7.2493	8.10339	7.35223	6.03368	5.66297	6.58783	7.01953	6.58783	6.25329	7.68892	7.78486	6.43899	6.91907	6.04335	6.23365	7.67375	6.27788	6.16198	6.20723	5.9265	6.56139	6.24579	6.15511	6.28646	7.10043	7.00951	5.9113	6.00583	6.78104	6.14787	7.2493	7.08956	6.8879	5.90816	7.00951	7.05546	6.08027	7.13781	6.99374	6.01563	7.18754
hsa-miR-4729	-1.01146	-0.00721598	-3.80041	0.000184869	0.000379351	-0.713685	DOWN	-1.64092	-1.56057	-1.63331	-1.6019	-0.753	-1.33043	1.37847	-1.62016	-0.361248	-1.49655	-1.08331	-1.53249	-1.59132	4.19923	3.61329	5.15252	3.19108	3.51672	3.30675	4.37925	1.39101	3.77986	-1.29147	2.78484	1.51353	2.1105	2.79452	2.40219	1.23723	2.00323	2.64823	3.44543	4.46508	3.25896	-0.7093	2.6937	3.95618	-1.66156	2.77184	-1.50963	-1.60817	-1.14451
hsa-miR-4730	2.65455	8.74734	19.1414	1.51928e-49	7.21657e-48	102.099	UP	7.985	7.66116	5.54611	7.44033	7.67375	7.88185	6.96498	8.18226	7.10681	7.44033	7.49237	6.56139	7.63577	8.02865	8.25669	7.10043	6.22219	7.04373	6.41283	7.31679	8.18226	8.54948	7.81216	7.75579	7.74304	6.68167	7.13781	6.35197	7.29077	7.50615	8.34582	6.51448	7.10043	8.34582	7.26368	6.56963	6.1037	7.87493	6.82777	6.05825	7.4793	7.61042
hsa-miR-4732-3p	2.86387	2.02887	11.6672	4.99295e-25	6.12772e-24	45.8664	UP	-0.579943	3.16392	-1.63331	2.17882	-0.753	3.94484	2.36632	3.96638	-0.361248	-1.49655	-1.08331	-1.53249	0.553917	-1.37441	-0.79222	-1.15718	-1.12207	-1.67499	2.09829	1.97666	3.77244	4.32398	-1.29147	1.68748	0.0814	-1.62534	4.09591	-1.57398	1.06385	4.36253	1.5089	3.2277	1.05752	-1.41896	-0.7093	-1.66395	-0.884943	3.13748	-1.66329	-1.50963	3.25896	-1.14451
hsa-miR-4732-5p	-2.08476	6.0819	-16.9928	1.51973e-42	4.87263e-41	86.0321	DOWN	5.70189	5.9265	7.18754	5.68502	6.51006	7.10043	7.99923	7.35223	6.60678	7.53853	5.79844	6.39588	7.59813	7.54583	5.77878	8.02865	6.9407	8.01548	7.27766	7.99923	7.32884	7.62351	7.41369	7.81216	7.54583	8.58256	8.54948	7.27766	7.66116	7.23627	7.07717	7.16294	7.58504	8.0583	6.73982	7.73003	7.40263	5.58256	5.95214	6.20004	7.99923	6.70994
hsa-miR-4733-3p	1.55108	2.86407	5.30571	2.62921e-07	7.45185e-07	5.57679	UP	-1.64092	-1.56057	0.932174	-1.6019	-0.753	4.30745	4.29573	3.90711	-0.361248	1.98156	5.0818	4.59265	2.85313	-1.37441	-0.79222	4.07671	-1.12207	-1.67499	3.39876	4.40594	2.17882	2.21374	3.52452	3.95049	4.12405	3.83797	0.533398	1.71947	-1.63472	1.49731	3.582	3.36322	4.30392	-1.41896	-0.7093	-1.66395	-0.884943	3.73171	2.00799	5.04873	0.40857	-1.14451
hsa-miR-4734	-1.14423	12.7327	-16.998	1.46181e-42	4.74626e-41	86.0708	DOWN	13.2276	13.4839	12.8165	12.0842	13.7162	13.1079	13.8846	13.2276	12.7041	12.0842	13.7162	13.7162	13.014	13.2276	13.3915	12.1909	13.7162	13.7162	13.7162	13.7162	13.7162	13.7162	13.5856	13.7162	13.3043	13.7162	13.2276	13.5856	13.7162	13.7162	13.5856	13.7162	13.5856	13.5856	11.7445	13.4839	13.5856	12.037	13.8846	13.7162	13.4839	13.4839
hsa-miR-4740-3p	2.02477	3.9353	8.32853	7.28481e-15	4.44894e-14	22.6552	UP	3.55274	6.11798	-1.63331	0.347183	-0.753	4.19923	4.65245	3.64011	-0.361248	2.88446	-1.08331	0.799961	5.18562	-1.37441	-0.79222	4.65818	-1.12207	5.41586	4.95715	3.52911	4.94538	3.55274	3.95618	4.41309	4.64146	4.33486	4.38992	4.33301	4.13191	4.13629	4.84427	3.60464	2.20483	-1.41896	-0.7093	6.09381	-0.884943	5.31574	3.30161	5.00575	4.89502	2.98749
hsa-miR-4740-5p	-2.27198	5.21569	-14.6212	1.05313e-34	2.127e-33	68.0419	DOWN	5.37447	7.81216	8.39614	7.36533	7.03251	6.17688	6.03977	6.74996	6.69116	6.65388	6.954	8.38686	6.44735	6.57914	6.81292	7.8526	8.34582	7.05546	6.71519	7.15072	6.3319	6.02673	5.8517	6.52722	6.98254	6.17688	6.16198	5.60834	6.34335	6.43103	6.45623	6.69116	6.26125	4.94538	6.54426	5.41127	6.8879	4.37395	7.1997	5.76033	5.41586	6.83266
hsa-miR-4742-3p	-1.23385	0.202765	-4.47058	1.22347e-05	2.88436e-05	1.87147	DOWN	-1.64092	3.11312	1.20081	-1.6019	-0.753	4.09591	3.92829	0.311709	-0.361248	4.61198	5.36518	-1.53249	-1.59132	2.60586	-0.79222	-1.15718	-1.12207	-0.682776	2.07064	-1.45183	-1.63778	3.81695	-1.29147	-1.57603	2.13949	-1.62534	-1.65392	-1.57398	-1.63472	-1.64422	-1.4824	-1.45027	-1.61629	1.64663	3.8711	-1.66395	-0.884943	-1.66156	-1.66329	3.43656	-1.60817	5.29344
hsa-miR-4742-5p	-1.27199	-0.598199	-5.79165	2.26688e-08	7.33234e-08	7.96048	DOWN	4.52252	-1.56057	1.85002	-1.6019	-0.753	-1.33043	1.87797	2.26082	-0.361248	-1.49655	4.46162	-1.53249	1.41243	-1.37441	-0.79222	-1.15718	-1.12207	-0.416833	-1.63592	-1.45183	-1.63778	-1.67642	2.66507	2.21374	6.10722	-1.62534	1.90973	2.42921	-0.419443	3.25675	-1.4824	-1.45027	0.790176	-1.41896	-0.7093	-1.07404	-0.884943	-1.66156	-1.66329	4.32398	4.96071	2.5088
hsa-miR-4744	-2.16205	0.281159	-7.71307	3.66146e-13	1.90114e-12	18.7883	DOWN	-1.64092	-1.56057	1.88022	5.18357	4.33671	-1.33043	3.16847	2.25567	4.6985	4.73713	4.5	6.67121	-1.59132	-1.37441	-0.79222	-1.15718	-1.12207	-1.67499	2.38313	2.85313	3.04843	-1.67642	2.48213	-1.57603	-1.66137	3.26986	2.14523	-1.57398	-1.63472	3.10285	1.20832	4.60848	-1.61629	-1.41896	-0.7093	0.36687	-0.884943	-0.339157	-0.288387	-1.50963	4.69478	-1.14451
hsa-miR-4746-5p	-1.01112	0.0294156	-3.93332	0.000110853	0.000235303	-0.229881	DOWN	2.73631	-1.56057	1.22297	3.10067	-0.753	-1.33043	-0.386083	2.14947	-0.361248	-1.49655	-1.08331	-1.53249	-1.59132	-1.37441	-0.79222	-1.15718	-1.12207	1.68517	3.23573	3.47604	0.66013	3.16151	-1.29147	-1.57603	-1.66137	2.73631	3.28883	2.714	0.0565565	-1.64422	-1.4824	-1.45027	0.22193	-1.41896	-0.7093	3.11952	-0.884943	3.7016	0.471187	4.49817	4.28898	-1.14451
hsa-miR-4748	2.58597	2.88838	9.9174	1.54118e-19	1.31333e-18	33.3131	UP	2.81717	-1.56057	2.81487	2.34647	-0.753	-1.33043	3.23967	1.91952	-0.361248	2.58	-1.08331	-1.53249	4.52252	-1.37441	3.95049	-1.15718	-1.12207	-0.812017	-1.63592	3.31545	3.0386	3.346	4.03246	1.67604	3.96013	4.00964	4.83233	4.13629	1.43281	3.94665	3.53887	1.92998	2.74067	-1.41896	5.58256	3.83971	4.20441	3.3221	2.47774	4.17568	2.20953	-1.14451
hsa-miR-4753-5p	-2.22491	1.39989	-7.97365	7.11085e-14	3.93089e-13	20.4051	DOWN	-1.64092	5.75423	4.86777	5.4434	-0.753	3.52087	3.07272	3.74582	-0.361248	4.91455	-1.08331	5.52551	4.08442	4.1203	4.29952	-1.15718	-1.12207	2.35547	3.54362	-1.45183	-1.63778	0.22193	3.45387	1.39869	1.2698	-1.62534	0.805439	4.38813	2.99194	3.13509	4.15145	5.01578	3.28687	3.13509	-0.7093	4.59265	-0.884943	3.85604	-1.66329	5.15065	0.176926	4.32914
hsa-miR-4754	-1.42811	2.34835	-4.75353	3.5185e-06	8.85667e-06	3.06896	DOWN	-1.64092	1.79243	4.24421	5.72238	-0.753	5.62477	5.34274	4.27467	4.82126	4.2137	4.87946	5.97244	4.95715	3.83797	3.46708	-1.15718	4.38408	2.26082	4.67648	4.27467	5.26233	3.4561	4.58497	4.98447	3.00098	4.83047	3.94298	5.15699	1.8247	3.84871	3.86417	4.49254	5.59787	-1.41896	-0.7093	-1.66395	3.94113	0.47727	2.62586	3.90918	1.01877	4.71115
hsa-miR-4755-3p	-4.30448	4.10423	-15.6773	3.3479e-38	8.17843e-37	76.0659	DOWN	7.00951	8.43012	8.7593	8.2649	6.17688	6.0121	6.73982	6.64345	7.01953	5.62992	5.87373	7.48583	5.65206	5.8489	4.26947	5.06672	6.61151	6.49668	6.22219	8.62172	5.95868	5.6032	5.16716	5.53518	5.62992	5.93222	5.83636	5.72552	5.24572	6.06192	5.24986	6.02673	5.89553	4.6985	5.4434	6.89867	8.8467	6.73041	7.95389	7.81216	5.99586	7.68892
hsa-miR-4757-5p	-3.70012	2.3674	-13.8349	4.19556e-32	7.5256e-31	62.0786	DOWN	-0.149922	5.70189	5.07453	6.34335	-0.753	4.1149	5.37693	4.91886	5.18562	4.33671	5.10337	6.22219	5.14877	4.00761	4.95124	5.74203	6.58349	4.86379	5.73613	5.40466	6.26125	3.81167	4.26017	4.27811	4.91039	5.49486	4.0921	4.20441	4.16637	5.01773	5.35677	5.88878	4.91039	-1.41896	-0.7093	3.71929	3.11312	4.05632	4.15517	4.49254	4.27639	4.01139
hsa-miR-4764-5p	-1.23471	-0.653957	-5.72325	3.23e-08	1.0241e-07	7.61542	DOWN	-1.64092	-1.56057	-1.63331	2.58651	-0.753	-1.33043	3.69958	2.57046	-0.361248	-1.49655	-1.08331	-1.53249	3.23967	-1.37441	-0.79222	-1.15718	-1.12207	-1.67499	2.24655	-1.45183	0.360883	-0.0376261	-1.29147	-1.57603	-0.990233	-1.62534	3.03438	-1.57398	1.34287	-1.64422	-1.4824	-1.45027	2.66273	-1.41896	-0.7093	-1.66395	3.38779	2.42082	-1.66329	-1.50963	-1.60817	-1.14451
hsa-miR-4766-3p	-1.2635	-0.603784	-5.72699	3.16834e-08	1.00579e-07	7.6342	DOWN	-1.64092	-1.56057	2.82176	-1.6019	-0.753	1.97928	3.26271	-1.62016	-0.361248	-1.49655	-1.08331	3.58824	-1.59132	3.06573	5.91445	4.01862	-1.12207	2.09829	-1.63592	-1.45183	0.0593174	-1.60494	-1.29147	0.711143	0.926826	-1.62534	1.38163	-1.57398	-0.511787	-1.64422	-1.4824	-1.45027	2.62325	-1.41896	-0.7093	-0.503957	-0.884943	-1.66156	-1.66329	2.87754	-1.60817	5.96559
hsa-miR-4766-5p	-1.41864	0.585416	-5.08066	7.76135e-07	2.09116e-06	4.52807	DOWN	4.99592	-1.56057	2.19389	-1.6019	-0.753	-1.33043	-1.63632	3.87447	5.44855	-1.49655	-1.08331	5.37693	-1.59132	3.3135	-0.79222	-1.15718	3.67369	2.0171	1.45158	1.5485	2.06614	3.90711	-1.29147	-1.57603	0.275613	1.58451	3.99265	3.0386	3.08366	4.65639	-1.4824	4.09973	4.22873	4.48196	4.24049	1.89658	-0.884943	3.92628	-1.66329	-1.50963	3.99436	2.63375
hsa-miR-4770	-2.06476	-0.0803223	-8.26442	1.10372e-14	6.59916e-14	22.2447	DOWN	-1.64092	4.28898	3.81695	5.08	-0.753	2.56445	2.17882	-1.62016	-0.361248	4.70383	4.66174	4.42607	-1.59132	-1.37441	-0.79222	-1.15718	5.53277	-0.407778	3.06573	4.04137	3.97192	-0.334165	-1.29147	-1.57603	-0.762204	3.7282	-1.65392	-1.57398	3.7959	1.81129	3.12178	-1.45027	3.17302	-1.41896	-0.7093	2.10296	3.22325	-1.66156	-1.66329	-1.50963	2.58325	-1.14451
hsa-miR-4771	-3.3869	4.19227	-13.3575	1.57159e-30	2.60072e-29	58.471	DOWN	1.20832	6.86541	7.37779	5.99586	4.8286	6.20004	8.32963	5.5409	6.10722	5.93222	7.57126	9.16403	6.34335	4.5319	4.85022	6.61624	7.78486	6.42195	5.6032	7.04373	7.4793	4.41309	5.34274	6.12597	6.02673	6.72043	3.91125	6.11798	3.94484	3.65549	5.88878	3.66955	6.80126	-1.41896	5.06672	2.04744	3.95251	5.59523	5.86123	6.27788	2.32544	6.87665
hsa-miR-4774-5p	-1.52378	-0.151735	-5.87024	1.50368e-08	4.97671e-08	8.36078	DOWN	-1.64092	2.1222	1.99136	0.679657	-0.753	2.67202	0.169196	-1.62016	-0.361248	-1.49655	3.63781	6.20004	-1.59132	-1.37441	-0.79222	3.20186	4.16242	-1.67499	0.857109	1.59817	3.06136	1.9492	-1.29147	1.6607	-1.66137	3.41062	2.07064	-1.57398	-1.63472	-1.64422	1.44863	3.21483	3.65549	-1.41896	-0.7093	-1.66395	3.21126	-1.66156	-1.66329	-1.50963	-1.60817	3.00988
hsa-miR-4776-3p	1.02112	1.26137	3.6626	0.000309652	0.00061475	-1.19979	UP	-1.64092	-1.56057	4.04706	3.62525	-0.753	-1.33043	-0.391343	-1.62016	-0.361248	2.99194	5.09332	-1.53249	1.36547	-1.37441	-0.79222	3.31979	-1.12207	-1.42301	-1.63592	2.04498	-1.63778	-1.25751	-1.29147	1.3306	-1.66137	-1.62534	2.5212	2.20953	3.25058	1.68748	3.06136	2.63887	-1.61629	4.435	-0.7093	0.441785	-0.884943	2.14947	-1.66329	-1.50963	3.69958	2.68672
hsa-miR-4776-5p	-1.51547	4.11063	-7.59653	7.54571e-13	3.80999e-12	18.0755	DOWN	3.44125	4.75268	5.68502	5.64663	4.63442	4.1848	5.2985	4.82126	4.50942	5.8768	5.2413	5.02757	5.40243	3.90356	4.09591	5.07453	6.09062	4.95312	4.52434	5.21276	4.95513	5.49486	5.59787	5.82996	5.2775	4.85607	4.96895	6.04693	5.08603	4.79251	5.63523	5.14478	3.62793	4.01677	-0.7093	5.21932	5.75423	3.9831	3.94665	5.33133	5.32442	4.47159
hsa-miR-4777-3p	-2.46726	0.3155	-9.10989	4.06707e-17	2.99771e-16	27.7873	DOWN	-1.64092	-1.56057	-1.63331	2.04253	4.7678	-1.33043	2.29345	4.41309	-0.361248	2.53638	3.7282	6.45623	1.90073	3.187	-0.79222	2.89601	6.9407	3.71506	-1.63592	4.50768	5.58763	-0.299035	-1.29147	4.69666	-0.810078	2.17882	-1.65392	4.22294	-1.63472	0.372383	3.55966	-1.45027	6.05075	-1.41896	-0.7093	-1.66395	-0.884943	-1.66156	0.909596	-1.50963	1.98633	-1.14451
hsa-miR-4779	-1.5377	-0.329498	-6.86557	6.06426e-11	2.57957e-10	13.7591	DOWN	1.23723	-1.56057	-1.63331	-1.6019	-0.753	-1.33043	2.40219	0.396874	4.30745	2.75407	-1.08331	-1.53249	-1.59132	1.89233	-0.79222	-1.15718	5.01968	-0.468135	-1.63592	3.18904	3.64725	4.18812	-1.29147	-1.57603	-1.66137	-1.62534	2.97524	-1.57398	1.15355	3.25058	1.91952	4.03615	3.032	-1.41896	-0.7093	-0.695728	-0.884943	1.09418	-1.66329	2.54684	1.18146	-1.14451
hsa-miR-4780	2.2889	1.63311	8.79207	3.44652e-16	2.34491e-15	25.672	UP	1.90073	-1.56057	-1.63331	4.76047	3.9303	-1.33043	-0.216552	-1.62016	-0.361248	-1.49655	4.48196	-1.53249	-1.59132	-1.37441	-0.79222	-1.15718	-1.12207	4.91039	3.31545	-1.45183	3.47604	-0.13057	-1.29147	1.35636	3.37748	1.24412	-0.414222	0.492763	3.11312	-1.64422	3.08775	2.58651	-1.61629	-1.41896	-0.7093	-0.314309	3.58418	-1.66156	2.20953	-1.50963	4.22114	-1.14451
hsa-miR-4783-3p	-2.45168	7.19411	-21.8977	2.94319e-58	2.79603e-56	122.094	DOWN	8.29854	8.63905	7.77076	5.393	8.46354	8.36271	9.00229	8.43012	8.2142	8.2302	8.60238	8.7593	8.16719	8.29854	8.44524	6.96498	8.04255	8.86813	9.02374	8.82378	8.37758	8.62172	9.10682	8.82378	8.82378	8.49513	8.29854	8.63905	9.04921	8.97867	8.65844	9.4016	8.60238	8.95476	7.62351	9.13985	9.13985	7.92593	9.23446	9.53519	9.04921	8.78166
hsa-miR-4783-5p	-1.46436	5.41851	-8.71836	5.62894e-16	3.75019e-15	25.1867	DOWN	5.62214	8.8467	6.54048	9.16403	7.99923	5.52078	6.48333	7.36533	7.30297	6.48333	6.47862	5.7697	5.12913	7.73003	5.56735	6.04693	6.54426	4.63058	6.19228	6.25329	5.65764	7.50615	5.43427	5.35677	5.58763	5.77261	6.99374	2.61326	5.35677	7.4793	4.99997	7.77076	5.59011	6.38641	-0.7093	7.67375	9.04921	6.38641	5.88274	7.46683	5.36057	5.73111
hsa-miR-4786-3p	-1.18289	2.55637	-4.59838	7.0185e-06	1.69355e-05	2.40476	DOWN	3.26592	3.71929	1.76169	-1.6019	3.96448	-1.33043	3.63781	4.47817	5.13518	5.427	4.72599	5.22825	4.75455	4.69666	-0.79222	5.6032	6.06583	5.18357	4.96071	5.48305	3.53887	4.97087	3.25896	3.27163	4.5299	0.594304	4.56694	3.72335	4.24421	4.05632	3.37748	5.68502	3.77986	2.10772	4.85963	1.00076	5.66297	1.05107	3.85604	4.73896	5.13518	-1.14451
hsa-miR-4786-5p	-1.15237	2.19779	-4.19302	3.92484e-05	8.70113e-05	0.757084	DOWN	-1.64092	3.26271	4.5319	2.74305	-0.753	6.16939	5.55739	1.07646	-0.361248	3.20708	5.68229	4.58883	-1.59132	4.27811	-0.79222	4.74857	4.44466	2.81257	4.93962	3.4961	3.73546	3.50427	-1.29147	3.00988	4.60472	3.69559	4.05258	4.71821	-0.51827	3.187	3.97947	2.42082	0.700052	-1.41896	-0.7093	-1.66395	4.36057	-1.66156	0.578639	4.41143	2.78484	4.38088
hsa-miR-4787-3p	-1.63159	6.54708	-21.1824	4.96815e-56	4.24777e-54	116.983	DOWN	7.16294	7.13781	6.47862	8.01548	7.30297	8.07172	6.5529	7.29077	7.64764	7.77076	7.2493	6.69116	7.62351	7.17558	7.81216	7.79728	6.42195	7.55832	7.11318	7.07717	7.16294	6.73512	6.81292	7.32884	7.75579	7.70433	7.77076	7.4793	7.26368	7.4534	6.99927	6.62489	7.01953	6.46054	8.2142	7.27766	7.27766	7.30297	7.07717	6.5529	6.75993	6.86541
hsa-miR-4789-3p	-1.76826	-0.217508	-7.7173	3.56616e-13	1.85918e-12	18.8143	DOWN	-1.64092	2.08149	-1.63331	2.714	-0.753	-1.33043	0.912717	2.54684	-0.361248	-1.49655	-1.08331	1.00076	0.793539	-1.37441	-0.79222	-1.15718	2.55384	-0.777104	-1.63592	-1.45183	1.23051	1.31621	-1.29147	3.90166	-0.37567	2.27166	2.89822	-1.57398	0.553917	0.530152	1.94678	2.20718	3.3373	-1.41896	-0.7093	1.49731	-0.884943	-1.66156	-1.07937	2.87754	-1.60817	-1.14451
hsa-miR-4789-5p	-4.22164	2.48142	-14.8362	2.04343e-35	4.2613e-34	69.6753	DOWN	5.40689	4.32584	6.06192	3.346	3.62793	2.2775	4.33301	3.57981	-0.361248	6.46485	2.98971	4.45035	7.05546	4.435	7.06565	4.25805	6.80126	4.77896	4.89123	4.76047	4.63058	4.86777	6.58783	6.73041	4.79422	3.62031	5.05699	6.5971	3.00556	3.37506	6.85468	4.53782	7.21241	5.81185	6.11074	4.21742	5.98584	6.21475	5.33133	6.20723	5.95868	3.93754
hsa-miR-4792	1.27156	5.8291	7.34551	3.50572e-12	1.64692e-11	16.5624	UP	6.52306	5.3701	-1.63331	4.6397	5.83986	6.89867	6.09699	6.0121	4.65639	4.21742	6.00583	5.05287	6.33574	5.25809	6.5189	4.65818	-1.12207	6.20004	5.40243	5.61951	5.78394	4.62855	5.40243	5.94583	5.93222	5.48305	5.27523	5.393	5.8517	5.22388	5.26021	4.76593	5.21276	4.35079	5.42476	5.97948	4.98447	5.49486	6.62057	4.05632	5.62992	3.70363
hsa-miR-4793-3p	2.68545	1.98271	10.5217	2.11095e-21	2.01286e-20	37.5708	UP	2.6986	-1.56057	0.771743	-1.6019	-0.753	4.99216	-1.63632	-1.62016	-0.361248	-1.49655	-1.08331	3.4713	-1.59132	2.18604	3.89261	8.24849	-1.12207	-0.4035	1.75484	2.97524	4.88679	0.578639	-1.29147	4.01313	0.307704	0.419678	0.38017	-1.57398	0.256787	2.08149	2.16924	2.88213	0.47727	-1.41896	-0.7093	2.37743	-0.884943	3.63148	-1.66329	-1.50963	0.19303	-1.14451
hsa-miR-4795-3p	-2.63852	1.25429	-8.10433	3.09172e-14	1.76228e-13	21.2273	DOWN	0.162174	2.10296	6.85468	10.0911	4.22673	4.7908	3.74788	-1.62016	4.89502	-1.49655	5.05061	6.96498	-1.59132	3.61329	7.16294	4.41309	5.64935	4.57768	4.21928	3.15323	4.90039	3.22132	-1.29147	3.35443	3.63148	5.10893	4.08252	2.85817	2.24655	4.83611	4.44298	4.70739	5.1152	2.20718	-0.7093	-1.66395	5.18151	-1.66156	2.83197	-1.50963	2.08821	-1.14451
hsa-miR-4796-3p	-1.91	0.224521	-7.01502	2.52768e-11	1.11019e-10	14.619	DOWN	5.2413	1.07321	-1.63331	-1.6019	5.97948	3.91325	-0.540061	3.2772	5.12123	-1.49655	4.51463	3.02598	-1.59132	-1.37441	-0.79222	-1.15718	4.5869	3.30675	0.471187	2.2162	2.6937	4.35862	-1.29147	5.42027	2.06839	4.49633	4.70383	2.0171	0.307704	5.03943	-1.4824	-1.45027	2.2231	2.64585	-0.7093	3.42183	-0.884943	-1.66156	-0.0376261	-1.50963	-1.60817	3.4961
hsa-miR-4797-3p	-1.18007	0.214398	-4.33551	2.17286e-05	4.98961e-05	1.32161	DOWN	4.51115	-1.56057	-1.63331	-1.6019	-0.753	-1.33043	4.15517	1.93943	-0.361248	-1.49655	3.65549	4.00557	3.79798	-1.37441	-0.79222	-1.15718	3.58824	-1.16497	4.71821	-1.45183	3.96448	-1.67642	-1.29147	-1.57603	2.61561	4.0615	0.635552	0.623074	0.291774	4.13191	3.01747	-1.45027	1.56205	3.21126	4.51289	-0.476687	-0.884943	-1.66156	-1.66329	-1.50963	-1.60817	4.70739
hsa-miR-4801	-2.04939	1.26257	-6.9697	3.29991e-11	1.43706e-10	14.357	DOWN	4.7678	2.53946	-1.63331	5.69069	-0.753	2.73631	1.41243	1.43015	-0.361248	-1.49655	-1.08331	5.04686	2.86215	4.38248	-0.79222	-1.15718	5.47857	4.38088	0.7507	3.8601	3.85604	3.08775	3.09649	-1.57603	4.57222	3.76843	2.84856	4.0921	1.90292	3.9303	4.01139	-1.45027	1.21525	-1.41896	4.85607	1.8873	4.37925	1.52047	3.78836	3.33253	5.13518	-1.14451
hsa-miR-4804-3p	1.99502	1.80863	8.05075	4.35399e-14	2.45991e-13	20.8893	UP	4.97632	-1.56057	1.61168	-1.6019	-0.753	3.31545	-1.63632	2.14236	-0.361248	3.13748	2.74067	-1.53249	-1.59132	-1.37441	-0.79222	-1.15718	-1.12207	-0.874352	1.98383	-1.45183	3.18369	3.7282	2.41435	4.18132	2.15747	4.03615	-1.65392	2.87086	2.39171	2.55384	4.0921	3.18369	-1.61629	-1.41896	4.24811	-1.66395	-0.884943	3.08106	0.812139	-1.50963	1.27578	-1.14451
hsa-miR-485-3p	2.10709	2.61667	8.37397	5.4217e-15	3.35101e-14	22.9471	UP	-1.64092	2.11328	0.584713	2.6084	5.07453	3.30161	4.10893	1.1749	-0.361248	4.25383	-1.08331	-1.53249	-1.59132	4.03968	-0.79222	-1.15718	-1.12207	2.62586	4.16071	2.35547	-0.149922	2.47091	-1.29147	2.04744	-0.685709	3.67999	1.17132	2.15987	4.7908	1.92998	-1.4824	-1.45027	-1.61629	4.53943	3.53887	-1.10988	-0.884943	-1.66156	4.65639	3.65363	2.88213	3.86757
hsa-miR-487b-5p	2.8269	2.61751	11.4667	2.19056e-24	2.56565e-23	44.3964	UP	5.31574	2.15508	-1.63331	1.08152	-0.753	2.78981	-1.63632	-1.62016	-0.361248	-1.49655	4.33301	3.33253	3.66736	4.96071	-0.79222	3.89441	5.13694	1.61168	-1.63592	-1.45183	3.89976	3.1957	-1.29147	3.10067	4.50575	0.332413	3.46919	4.63058	1.38479	2.15227	4.89123	2.22817	1.01877	-1.41896	-0.7093	0.305007	5.69614	-1.66156	2.37976	-1.50963	3.95618	-1.14451
hsa-miR-488-5p	1.77123	1.17455	6.54899	3.722e-10	1.47102e-09	11.9786	UP	3.28883	4.1397	-1.63331	-1.6019	-0.753	-1.33043	-1.63632	2.88996	-0.361248	1.97404	-1.08331	-1.53249	4.16637	-1.37441	-0.79222	3.0857	2.89189	-1.12927	-1.63592	-1.45183	2.83653	-1.67642	-1.29147	3.21483	0.969209	-1.62534	1.89865	3.9245	-1.63472	-1.64422	-1.4824	1.71448	-1.61629	4.43136	4.70739	3.4032	4.80386	4.26767	3.3373	2.84856	-1.60817	-1.14451
hsa-miR-491-5p	1.46749	5.10114	8.838	2.53637e-16	1.73952e-15	25.9754	UP	3.61566	-1.56057	4.59074	4.69289	3.93754	5.14877	4.8716	4.31472	7.79728	4.71115	-1.08331	3.58418	4.25173	-1.37441	5.07821	6.60678	4.60848	3.69758	4.96895	3.75001	3.582	4.45211	7.13781	5.42476	4.68938	3.97947	5.22607	5.71065	4.85404	4.03968	5.07022	3.84496	3.78628	-1.41896	-0.7093	4.85607	4.40786	5.34274	4.91455	5.0818	3.9831	3.987
hsa-miR-493-3p	1.58962	0.474563	6.02522	6.61923e-09	2.30059e-08	9.16173	UP	1.31621	-1.56057	-1.63331	2.20483	-0.753	-1.33043	1.18783	-1.62016	-0.361248	3.54362	-1.08331	-1.53249	-1.59132	-1.37441	-0.79222	-1.15718	-1.12207	-1.67499	2.22088	-1.45183	7.50615	-1.62172	-1.29147	-1.57603	-1.66137	-1.62534	0.372383	-1.57398	-1.63472	-1.64422	-1.4824	-1.45027	-1.61629	4.8173	-0.7093	4.42444	-0.884943	-1.66156	-0.121128	-1.50963	-1.60817	-1.14451
hsa-miR-494-3p	1.75197	3.67285	7.06173	1.91826e-11	8.55709e-11	14.8902	UP	0.332413	2.20718	-1.63331	5.13343	9.25687	-1.33043	2.91103	4.2137	4.48908	-1.49655	3.57767	-1.53249	3.3373	4.92069	-0.79222	4.92646	4.90608	5.17332	4.19177	-1.45183	1.68285	3.30418	3.07847	2.96904	1.60497	2.20483	3.94846	-1.57398	0.711143	4.56186	1.87381	-1.45027	0.0766217	3.0919	4.53943	3.02598	4.5489	4.30745	1.74602	4.18994	0.288963	6.5367
hsa-miR-494-5p	1.6372	0.157299	6.67223	1.84858e-10	7.50255e-10	12.665	UP	1.42511	-1.56057	-0.181974	4.28703	-0.753	-1.33043	2.67497	1.75743	-0.361248	-1.49655	-1.08331	1.13847	-1.59132	2.66741	-0.79222	2.72349	-1.12207	0.252383	-1.63592	-1.45183	-1.63778	-1.67642	-1.29147	-1.57603	-1.66137	-1.62534	-1.65392	1.69717	-0.329378	3.65176	-1.4824	-1.45027	-1.61629	-1.41896	-0.7093	-1.66395	-0.884943	-1.66156	-1.66329	-1.50963	-1.60817	-1.14451
hsa-miR-495-5p	1.06899	3.05888	3.5887	0.000405815	0.00079157	-1.45386	UP	5.44855	2.16496	3.23967	3.76625	4.29952	-1.33043	3.14218	5.09332	-0.361248	3.68744	4.95893	1.68748	-1.59132	2.5333	-0.79222	-1.15718	-1.12207	-0.339157	-0.181974	1.67604	-1.63778	2.62847	2.23731	-1.57603	1.83473	1.38479	4.24421	3.39876	5.0076	-1.64422	3.13748	-1.45027	0.187835	5.77261	5.37447	-1.66395	6.29462	6.16568	5.83287	6.92964	-1.60817	4.98823
hsa-miR-497-3p	-1.45048	-0.428926	-5.93401	1.07474e-08	3.63681e-08	8.68849	DOWN	-1.64092	-1.56057	-1.63331	1.82703	-0.753	-1.33043	3.83797	0.23627	-0.361248	-1.49655	4.35268	5.42027	1.71448	-1.37441	-0.79222	-1.15718	-1.12207	-1.23503	-1.63592	-1.45183	3.08775	-1.45027	-1.29147	-1.57603	-1.04128	4.31296	-1.65392	-1.57398	-1.63472	-1.64422	-1.4824	-1.45027	4.27811	-1.41896	-0.7093	3.33253	-0.884943	0.439196	1.95872	1.44863	-1.60817	-1.14451
hsa-miR-5001-3p	1.36652	0.978328	5.41551	1.5315e-07	4.47924e-07	6.10139	UP	1.8549	-1.56057	6.15511	3.35229	-0.753	2.48753	-1.63632	1.57943	-0.361248	1.72863	-1.08331	-1.53249	2.23256	-1.37441	-0.79222	-1.15718	-1.12207	1.30059	0.632791	2.28895	2.37042	-1.62039	2.68672	4.19177	3.39241	-1.62534	4.39714	-1.57398	3.23967	0.771743	-1.4824	-1.45027	3.99094	2.18873	-0.7093	2.36632	-0.884943	0.783274	3.30914	2.58651	-1.60817	-1.14451
hsa-miR-5002-3p	2.68264	1.5574	10.4387	3.82494e-21	3.54187e-20	36.9807	UP	3.06573	3.5317	0.00253478	-1.6019	-0.753	-1.33043	-1.63632	3.75616	-0.361248	-1.49655	-1.08331	1.53817	1.49731	-1.37441	-0.79222	-1.15718	-1.12207	0.167167	-0.449087	3.6916	2.96661	4.18132	-1.29147	-1.57603	2.86657	-1.62534	-1.65392	-1.57398	3.50427	2.66741	2.95302	-1.45027	-1.61629	-1.41896	-0.7093	-1.66395	-0.884943	3.99265	2.60332	4.47655	3.33492	-1.14451
hsa-miR-5004-5p	1.19205	-0.00292244	5.03321	9.70812e-07	2.58581e-06	4.3116	UP	-1.64092	1.95632	2.11328	-1.6019	-0.753	-1.33043	-1.63632	-1.62016	-0.361248	-1.49655	-1.08331	-1.53249	0.715843	-1.37441	-0.79222	-1.15718	-1.12207	0.22193	-1.63592	-1.45183	2.14523	0.88355	2.62325	4.42245	1.0872	1.41243	2.14523	-1.57398	0.396874	-1.64422	-1.4824	4.89502	4.42245	-1.41896	-0.7093	-1.16101	-0.884943	-0.283539	-1.66329	-1.50963	2.93589	-1.14451
hsa-miR-5009-3p	-1.21184	-0.0660138	-4.04875	7.03185e-05	0.000151952	0.20205	DOWN	4.73896	-1.56057	0.256787	-1.6019	8.44524	-1.33043	-1.63632	5.5781	-0.361248	-1.49655	3.9701	-1.53249	-1.59132	3.96448	-0.79222	-1.15718	-1.12207	-0.317965	4.02047	-1.45183	3.35229	3.9303	-1.29147	-1.57603	2.90838	-1.62534	4.71115	-1.57398	0.747457	5.07821	4.39171	5.10893	0.700052	-1.41896	-0.7093	5.78671	-0.884943	-1.66156	-0.90227	1.59817	3.4032	4.40978
hsa-miR-5009-5p	-1.05069	-0.197771	-3.92835	0.00011302	0.000238992	-0.248228	DOWN	-0.37567	1.29155	-1.63331	12.4434	-0.753	-1.33043	1.15355	-1.62016	4.57035	3.20002	-1.08331	-1.53249	-1.59132	-1.37441	-0.79222	-1.15718	-1.12207	-0.0980609	-1.63592	4.77136	3.26271	1.19403	-1.29147	2.75019	-1.66137	-1.62534	3.12178	2.61326	2.25567	4.9377	3.053	3.86417	3.46919	1.96956	-0.7093	-1.66395	-0.884943	-1.66156	4.25383	3.97373	-1.60817	-1.14451
hsa-miR-500b-3p	1.75957	1.72936	6.09598	4.52904e-09	1.609e-08	9.53249	UP	4.88679	-1.56057	3.94846	-1.6019	-0.753	-1.33043	3.79176	4.15708	-0.361248	-1.49655	-1.08331	2.32311	-1.59132	-1.37441	-0.79222	-1.15718	5.4927	-1.67499	-1.63592	-1.45183	-1.63778	4.00761	3.17544	4.1397	-0.589017	-0.259335	0.0197087	-1.57398	4.36646	3.67999	4.62652	-1.45027	-1.61629	6.0121	-0.7093	5.45856	-0.884943	-1.66156	1.39618	1.36851	3.68392	-1.14451
hsa-miR-501-5p	1.31514	0.133024	5.54894	7.85795e-08	2.36569e-07	6.74998	UP	2.09829	-1.56057	1.73186	1.21178	-0.753	-1.33043	1.87797	4.10893	-0.361248	-1.49655	-1.08331	-1.53249	-1.59132	-1.37441	-0.79222	-1.15718	3.67999	-1.67499	-1.63592	-1.45183	-1.63778	-1.67642	-1.29147	-1.57603	1.67337	1.82936	6.25329	-1.57398	2.3185	-1.64422	-1.4824	-1.45027	2.11964	2.5088	-0.7093	0.144357	-0.884943	1.99136	-1.66329	-1.50963	-1.60817	-1.14451
hsa-miR-5010-3p	2.51879	1.91086	9.94771	1.24555e-19	1.0685e-18	33.5243	UP	-0.20677	-1.56057	3.71929	1.06068	-0.753	-1.33043	0.259437	-1.62016	-0.361248	-1.49655	3.89261	2.85817	-1.59132	-1.37441	-0.79222	2.68237	3.4806	-1.67499	1.81941	2.59223	2.9428	2.33021	3.16847	-1.57603	4.02863	-1.62534	2.49747	2.21374	2.89601	0.839361	3.40579	4.18132	4.50768	-1.41896	-0.7093	-0.585152	-0.884943	0.0690065	0.302309	0.962887	2.42541	-1.14451
hsa-miR-502-5p	-1.09431	0.752125	-3.67719	0.000293395	0.000584284	-1.14906	DOWN	2.41435	-1.56057	-1.63331	6.17688	-0.753	3.51672	4.71469	1.95392	-0.361248	-1.49655	-1.08331	4.3701	3.0751	2.5443	5.28468	5.35209	3.26271	-1.67499	3.99804	2.75019	-1.63778	-1.13752	-1.29147	2.03519	3.73171	1.4012	0.286152	3.7016	0.124435	0.831639	1.91243	-1.45027	-1.61629	4.79422	3.72335	-0.305335	4.22473	0.405687	4.4578	4.84635	-1.60817	5.66031
hsa-miR-503-5p	-1.37205	0.791649	-4.80087	2.84041e-06	7.22066e-06	3.27522	DOWN	3.77244	1.16773	5.16117	4.94738	-0.753	2.08821	0.411415	-1.62016	-0.361248	3.987	-1.08331	-1.53249	1.49141	1.86447	-0.79222	-1.15718	5.23644	2.43152	-0.227617	1.40669	-1.63778	3.33253	-1.29147	1.66883	3.29254	2.16924	0.500352	4.10893	3.85807	4.47159	-1.4824	-1.45027	-1.61629	3.70739	-0.7093	1.87167	-0.884943	-0.75083	3.23573	1.99605	4.12217	3.91911
hsa-miR-504-3p	1.10521	6.1289	11.9942	4.41739e-26	5.90135e-25	48.2778	UP	6.21475	5.36057	4.96502	6.27788	5.23644	5.53037	5.09793	5.59259	5.50161	4.90608	6.35197	4.37763	6.47391	5.55209	5.83287	5.25809	5.65764	5.99264	5.37447	5.06272	5.40243	5.43427	5.76033	5.85785	5.90175	5.88878	5.6742	5.94583	5.28468	5.52551	5.8517	6.70052	6.09062	2.30895	5.89553	5.28468	5.2149	6.06583	5.99264	5.6742	5.6032	6.4877
hsa-miR-505-3p	-1.03905	0.0213034	-3.87569	0.00013861	0.000289995	-0.441471	DOWN	1.03858	-1.56057	3.18369	1.5089	-0.753	-1.33043	1.8247	-1.62016	-0.361248	2.77406	4.58149	-1.53249	3.60464	3.08366	4.05463	-1.15718	-1.12207	0.0143087	-1.63592	-1.45183	-0.227617	-1.46431	-1.29147	1.43546	3.1957	1.45453	1.76413	-1.57398	-1.63472	-1.64422	-1.4824	4.86379	-1.61629	-1.41896	4.4578	-1.66395	3.57981	-0.906191	0.11543	1.94678	-1.60817	-1.14451
hsa-miR-506-3p	1.26405	0.845378	4.71806	4.12645e-06	1.0296e-05	2.91551	UP	4.89502	-1.56057	-1.63331	1.43281	3.42183	2.3751	3.90356	-1.62016	-0.361248	-1.49655	5.46811	1.71947	-1.59132	-1.37441	3.81695	-1.15718	-1.12207	0.121378	-1.63592	-1.45183	-0.149922	1.72863	-1.29147	-1.57603	-0.381243	-0.317965	-1.65392	-1.57398	1.24412	-0.485496	-1.4824	-1.45027	-0.0677913	2.17882	3.96013	-1.66395	-0.884943	0.217309	-1.66329	2.99194	2.87528	3.84871
hsa-miR-507	-1.07068	-0.103075	-3.97799	9.30643e-05	0.000198925	-0.064041	DOWN	2.43383	-1.56057	2.64117	1.77187	5.34517	3.44962	-1.63632	2.90838	4.14363	3.2808	-1.08331	3.20369	-1.59132	4.58149	-0.79222	2.69633	3.01555	0.329702	-1.63592	-1.45183	2.36315	-1.33442	-1.29147	-1.57603	-1.66137	-1.62534	-0.283539	3.42855	-1.63472	-1.64422	2.14523	-1.45027	-1.61629	-1.41896	3.67174	-1.66395	3.90711	5.02336	3.14822	4.67828	1.43281	-1.14451
hsa-miR-508-5p	3.54654	2.31405	13.3225	2.04824e-30	3.36778e-29	58.2073	UP	-1.64092	-1.56057	-1.63331	3.90918	3.95251	-1.33043	1.86953	-1.62016	-0.361248	-1.49655	-1.08331	3.52682	-1.59132	-1.37441	-0.79222	-1.15718	3.07847	4.47159	1.57093	-1.45183	2.64347	-1.57976	2.21374	-1.57603	3.84144	3.46919	-1.65392	3.7959	-0.343191	1.46713	-1.4824	1.65816	-1.61629	-1.41896	-0.7093	-0.492017	3.53887	3.346	-1.66329	2.64117	-1.60817	-1.14451
hsa-miR-5088-3p	2.00351	2.94658	7.99341	6.27245e-14	3.48999e-13	20.5289	UP	3.7282	2.79216	1.46713	-1.6019	-0.753	-1.33043	-0.269157	3.53429	4.40594	2.71882	-1.08331	-1.53249	1.06997	-1.37441	-0.79222	4.17379	-1.12207	4.30172	-1.63592	3.02197	3.582	3.77612	4.10662	4.32914	3.61566	3.57026	3.92272	4.2137	4.02437	3.10945	4.27126	4.45035	3.94484	2.14947	-0.7093	3.38779	6.0121	3.67564	0.969209	-1.50963	3.05507	-1.14451
hsa-miR-5088-5p	2.57938	3.65443	11.1997	1.55276e-23	1.71674e-22	42.45	UP	0.873235	1.31621	1.92998	-1.6019	-0.753	-1.33043	1.73948	2.51893	-0.361248	3.92092	2.6536	3.4806	-1.59132	-1.37441	-0.79222	2.90043	-1.12207	1.9492	2.52346	2.43923	4.03246	4.52252	3.95618	4.65996	5.1152	4.44104	4.43136	4.90824	5.14478	3.45387	4.56	4.85022	5.18151	1.6364	-0.7093	3.78421	4.65996	4.26405	-1.66329	-1.50963	4.35456	-1.14451
hsa-miR-509-3-5p	-1.41364	0.0296532	-5.523	8.95452e-08	2.67385e-07	6.62294	DOWN	1.5485	-1.56057	0.153826	3.61566	4.13191	4.07671	-0.0140261	0.452726	-0.361248	-1.49655	-1.08331	-1.53249	-1.59132	3.0919	5.03547	5.26427	-1.12207	-0.890978	-1.63592	-1.45183	-1.63778	-1.5619	3.58824	-1.57603	2.71641	-1.62534	-1.65392	2.26082	3.05507	-1.64422	-1.4824	-1.45027	-1.61629	5.10337	-0.7093	2.80826	-0.884943	3.40838	-0.59532	-1.50963	0.288963	-1.14451
hsa-miR-509-3p	-1.61095	0.41175	-5.7201	3.28283e-08	1.03956e-07	7.59961	DOWN	0.962887	-1.56057	3.08775	4.24811	-0.753	4.68938	-1.63632	3.29647	-0.361248	4.03791	3.48906	3.02962	2.07611	-1.37441	-0.79222	3.35843	5.44127	4.03054	0.962887	-1.45183	3.06573	3.35229	3.29069	-1.57603	-1.66137	5.21932	-1.65392	-1.57398	-1.63472	0.174035	-1.4824	-1.45027	0.7507	3.76843	-0.7093	-1.66395	3.4933	1.25987	-1.66329	-1.50963	-1.60817	6.66678
hsa-miR-5090	1.44639	7.17018	11.5935	8.60205e-25	1.04077e-23	45.3256	UP	7.4534	7.5187	6.00897	-1.6019	6.73041	6.69116	7.70433	7.30297	6.40475	5.5409	6.16198	6.19228	6.82289	6.65388	7.49237	6.17688	-1.12207	7.11318	6.26966	6.61624	7.18754	7.53853	7.1997	7.08956	7.23627	7.1997	6.43899	6.23365	7.39062	7.07717	7.43362	7.35223	5.91445	7.63577	4.74443	7.04373	6.41283	6.81292	7.70433	5.97948	7.11318	6.0121
hsa-miR-5091	-1.24374	0.549149	-4.62541	6.23052e-06	1.52058e-05	2.51919	DOWN	-1.64092	4.19748	0.731387	-1.6019	-0.753	3.62793	1.35636	2.81717	-0.361248	-1.49655	-1.08331	3.4933	1.96956	2.74543	-0.79222	-1.15718	2.80384	0.40857	2.83862	-1.45183	1.3252	-1.31073	4.19573	1.49436	2.33021	-1.62534	-1.65392	3.21711	1.517	2.93589	2.35547	1.43015	4.09973	2.5443	-0.7093	-1.66395	4.3112	0.578639	-1.66329	4.66174	1.03858	3.91125
hsa-miR-5092	-1.73852	0.799239	-5.92905	1.10328e-08	3.72848e-08	8.66291	DOWN	0.511374	6.08348	4.1203	4.61198	-0.753	1.99821	3.0386	3.31762	-0.361248	2.97524	3.55759	5.59259	3.44752	-1.37441	-0.79222	-1.15718	-1.12207	1.07646	-1.63592	1.66883	1.82936	-1.51752	3.11725	4.45388	-1.66137	2.75019	-1.65392	3.75214	-1.63472	-1.64422	3.05715	-1.45027	-1.61629	-1.41896	4.32213	-1.66395	3.96013	-1.0772	-0.232639	2.66741	-1.60817	-1.14451
hsa-miR-510-5p	-2.09173	0.277871	-7.65379	5.29335e-13	2.71007e-12	18.4249	DOWN	-1.64092	-1.56057	-1.63331	4.52617	-0.753	4.63058	1.03556	3.83797	-0.361248	4.66352	-1.08331	-1.53249	3.48705	-1.37441	-0.79222	2.73246	3.98129	1.79003	0.372383	-1.45183	-1.63778	2.24885	3.26432	-1.57603	-1.66137	-1.62534	2.74781	-1.57398	2.35314	-0.317965	-1.4824	-1.45027	4.32584	2.71882	-0.7093	-0.7469	-0.884943	-1.66156	-0.164161	-1.50963	-1.60817	5.22825
hsa-miR-5100	-3.4581	12.0085	-30.9985	3.17401e-84	1.62827e-81	181.606	DOWN	13.0632	14.1961	14.1961	15.0002	13.3043	13.5856	12.8683	13.1079	13.8846	13.4839	14.1961	15.0002	14.1961	13.7162	13.8846	15.0002	15.0002	15.0002	14.1961	13.8846	13.4839	13.5856	13.7162	13.8846	13.8846	14.1961	15.0002	14.1961	13.8846	13.8846	13.8846	14.1961	15.0002	12.8683	14.1961	13.7162	13.8846	13.4839	13.0632	13.8846	13.7162	13.8846
hsa-miR-512-5p	1.60157	1.815	6.14328	3.5085e-09	1.26572e-08	9.78206	UP	3.96828	1.4012	0.241948	0.502948	5.69342	-1.33043	-1.63632	-1.62016	-0.361248	2.33266	4.46508	4.72214	1.25053	-1.37441	4.21742	-1.15718	3.2377	-0.0272174	3.6916	2.53088	3.72132	-0.801978	-1.29147	3.51473	0.392174	-1.62534	2.79452	-1.57398	2.62586	3.99265	2.72795	-1.45027	-1.61629	4.32213	4.02863	-1.66395	3.6297	2.9405	0.744213	2.93285	1.71947	-1.14451
hsa-miR-514a-3p	-1.654	-0.376007	-6.8949	5.11193e-11	2.19266e-10	13.9269	DOWN	-1.64092	-1.56057	-1.63331	4.10432	-0.753	3.2277	3.99993	1.34849	-0.361248	1.43015	-1.08331	5.21062	-1.59132	2.10772	-0.79222	-1.15718	4.70383	2.85313	4.14713	1.94437	0.267035	-1.67642	-1.29147	-1.57603	-1.66137	3.75815	-1.65392	-1.57398	-0.0677913	-1.64422	-1.4824	-1.45027	-1.61629	-1.41896	-0.7093	-1.66395	-0.884943	0.909596	-1.66329	-1.50963	3.17302	2.83197
hsa-miR-516b-5p	-1.45896	0.556646	-4.9438	1.47396e-06	3.83829e-06	3.90809	DOWN	4.62289	3.96231	0.988487	1.97404	3.73171	2.02864	-0.232639	2.24437	-0.361248	-1.49655	-1.08331	-1.53249	2.97524	4.77721	-0.79222	5.78948	2.84071	3.01364	3.35643	2.29957	2.37976	1.30743	-1.29147	-1.57603	1.68285	2.39614	3.24504	2.63887	0.761002	0.0593174	-1.4824	3.37506	-1.61629	5.06847	7.10043	-1.66395	-0.884943	0.603696	2.21867	-1.50963	-1.60817	2.63887
hsa-miR-517c-3p	-1.71831	0.140999	-6.28071	1.65838e-09	6.13816e-09	10.515	DOWN	-1.64092	-1.56057	2.18873	1.28214	-0.753	4.80581	-0.339157	0.853713	4.11671	2.70088	-1.08331	3.68744	-1.59132	-1.37441	-0.79222	-1.15718	3.35229	0.302309	1.33735	-1.45183	-1.63778	2.94675	-1.29147	-1.57603	0.553917	2.92444	1.02527	-1.57398	-1.63472	-0.753	1.80332	-1.45027	2.79693	3.15756	-0.7093	-0.742883	3.09649	4.49254	-1.66329	-1.50963	2.31347	4.87536
hsa-miR-5187-3p	1.17653	0.642255	4.52001	9.88226e-06	2.33838e-05	2.07624	UP	0.576074	-1.56057	1.98383	-1.6019	4.58883	-1.33043	-1.63632	-1.62016	-0.361248	-1.49655	2.84856	-1.53249	2.52847	3.6916	-0.79222	-1.15718	3.22132	-1.67499	2.48213	-1.45183	-1.63778	2.34864	3.42626	-1.57603	0.108926	-1.62534	1.56205	1.41516	1.08436	-0.454004	-1.4824	2.41435	4.1274	3.4713	-0.7093	2.24219	3.29254	-1.66156	2.75407	-1.50963	3.18535	-1.14451
hsa-miR-5189-3p	1.33294	3.9636	6.75653	1.13987e-10	4.70817e-10	13.1394	UP	4.50381	4.18306	2.30895	1.96697	-0.753	3.42183	4.47494	3.86417	-0.361248	4.6066	3.97947	4.01313	2.73438	2.70088	5.10526	-1.15718	-1.12207	2.12477	4.57035	4.98038	4.18306	4.32914	3.44962	4.72972	5.17543	4.9728	4.98447	5.23887	5.14087	4.84635	4.77896	1.70991	4.81535	3.99804	-0.7093	-1.66395	5.57546	3.92272	5.03943	1.21525	4.138	-1.14451
hsa-miR-518b	1.84648	2.06039	6.86148	6.21011e-11	2.63724e-10	13.7358	UP	1.3739	-1.56057	-1.63331	-1.6019	3.95618	4.65442	-1.63632	-1.62016	-0.361248	-1.49655	-1.08331	1.79003	-1.59132	3.1307	-0.79222	3.63781	4.1274	2.3185	2.33698	3.35015	-1.63778	2.41435	3.21126	1.77187	3.03649	5.6032	1.73948	3.07847	4.22473	1.71448	-1.4824	-1.45027	1.3739	-1.41896	-0.7093	-0.913548	-0.884943	5.15252	4.88679	2.58651	1.97404	-1.14451
hsa-miR-518c-3p	-1.33479	0.665254	-4.16103	4.47267e-05	9.89001e-05	0.632563	DOWN	-1.64092	7.17558	3.68744	1.09069	4.85607	5.15252	4.39171	0.426196	4.64146	4.3112	-1.08331	5.18987	3.71718	-1.37441	3.8263	-1.15718	3.4933	-1.67499	4.90608	-1.45183	-1.63778	1.49141	-1.29147	4.11309	-1.66137	0.369626	-1.65392	-1.57398	-1.63472	-1.64422	-1.4824	-1.45027	-1.61629	-1.41896	-0.7093	-1.66395	-0.884943	-1.66156	3.10945	-1.50963	-1.60817	4.88323
hsa-miR-518d-3p	-2.21168	1.58319	-6.94773	3.75382e-11	1.62644e-10	14.2303	DOWN	1.63113	3.91718	3.10945	4.88679	-0.753	4.02437	3.81548	3.62031	-0.361248	2.82617	-1.08331	4.20441	4.57035	4.05801	-0.79222	4.72214	4.83999	4.14713	2.74543	-1.45183	1.9492	5.01212	3.08366	-1.57603	1.6607	3.67174	3.48282	-1.57398	0.124435	3.4713	3.36938	-1.45027	5.14283	-1.41896	-0.7093	4.25805	4.45971	-0.531161	1.47925	4.07671	-1.60817	5.11713
hsa-miR-5192	-1.17039	1.52475	-4.04201	7.22343e-05	0.000155698	0.17651	DOWN	2.79452	-1.56057	0.670685	-1.6019	4.24616	-1.33043	2.74543	3.37748	4.75642	5.0818	-1.08331	4.40594	-1.59132	3.25453	-0.79222	5.62214	6.90836	2.12477	2.97147	4.44298	4.99404	2.67792	4.07867	4.5299	4.2137	3.58621	2.40806	3.23573	1.57093	4.1397	2.40219	4.16242	4.74443	-1.41896	-0.7093	3.63148	-0.884943	-0.511787	2.98562	-1.50963	6.25329	-1.14451
hsa-miR-5193	2.10179	2.68733	7.956	7.95347e-14	4.38724e-13	20.2945	UP	0.169196	-1.56057	3.92272	1.39618	-0.753	-1.33043	3.4989	3.10502	-0.361248	1.34568	-1.08331	-1.53249	-1.59132	3.33918	-0.79222	-1.15718	-1.12207	4.23469	4.01313	-1.45183	3.5945	3.78421	2.13374	1.67604	4.89853	3.95049	-0.117648	3.6424	3.35443	4.81535	3.75214	3.17544	2.5443	-1.41896	-0.7093	0.40857	-0.884943	-0.742883	4.73713	1.68285	-1.60817	-1.14451
hsa-miR-5194	1.02448	0.864607	3.64576	0.000329462	0.000651621	-1.2581	UP	-1.64092	0.6671	-1.63331	4.5299	-0.753	-1.33043	-1.63632	1.70991	-0.361248	3.08366	-1.08331	4.69289	3.13987	2.41435	3.346	-1.15718	-1.12207	-0.366539	-1.63592	3.37149	-0.34793	-0.443174	-1.29147	4.24049	-0.613578	3.0751	-1.65392	4.58883	0.779735	-1.64422	-1.4824	-1.45027	0.441785	-1.41896	-0.7093	-1.66395	-0.884943	3.0919	3.18369	-1.50963	-1.60817	-1.14451
hsa-miR-5196-3p	1.08623	4.03881	5.24441	3.54274e-07	9.94216e-07	5.28759	UP	2.72349	3.84871	3.6424	7.06565	5.06079	3.88376	4.42607	4.61624	-0.361248	5.2149	2.97973	2.37976	-1.59132	3.94846	4.63058	-1.15718	3.30675	-1.67499	3.33033	4.9377	4.52617	4.94538	4.82126	4.06339	4.60103	4.42245	2.39614	4.75642	5.27977	2.6937	4.33301	4.35456	3.50839	3.31762	3.57981	4.3701	-0.884943	4.18812	4.05258	4.56	4.23262	4.3701
hsa-miR-519a-3p	-1.74827	0.385526	-5.95821	9.45525e-09	3.24668e-08	8.81352	DOWN	-1.64092	4.34713	-1.63331	-1.6019	-0.753	-1.33043	2.21374	-1.62016	-0.361248	-1.49655	4.28898	5.72832	0.286152	-1.37441	4.1397	4.02437	2.96448	2.16924	4.54708	2.86016	-1.63778	9.13985	-1.29147	-1.57603	3.72335	-1.62534	-1.65392	-1.57398	-1.63472	-1.64422	-1.4824	-1.45027	1.81372	-1.41896	5.47284	0.267035	3.4032	1.55372	-1.66329	-1.50963	4.36449	4.34713
hsa-miR-519c-5p	-2.41456	2.32685	-8.37702	5.31508e-15	3.29304e-14	22.9667	DOWN	2.18109	3.51056	4.44298	5.30057	-0.753	2.69633	3.42183	4.52617	5.53037	4.63795	-1.08331	4.93962	5.34517	4.57035	3.59254	4.30172	-1.12207	4.98447	3.6297	4.08063	3.76013	4.07277	4.72214	3.30675	4.46508	4.73713	3.77244	1.97666	4.47494	5.02757	3.50159	4.33108	4.43136	-1.41896	-0.7093	2.61796	-0.884943	4.82126	3.00772	3.75415	-1.60817	4.73896
hsa-miR-519d-3p	1.27326	2.50144	4.9868	1.20664e-06	3.17115e-06	4.1014	UP	1.81941	-1.56057	3.5317	4.15517	5.26021	3.42626	4.63795	4.1848	-0.361248	-1.49655	-1.08331	-1.53249	1.86231	-1.37441	-0.79222	-1.15718	-1.12207	0.241948	0.983343	-1.45183	2.86215	0.966048	2.32311	3.81548	0.719098	3.85207	0.584713	-1.57398	3.66512	3.62793	-1.4824	-1.45027	-1.61629	6.04693	4.83611	1.27578	-0.884943	3.08775	2.02864	4.26017	-1.60817	3.99094
hsa-miR-519d-5p	-2.12465	2.95967	-8.43251	3.70088e-15	2.33237e-14	23.3245	DOWN	5.19835	4.49081	6.13301	2.33482	-0.753	-1.33043	3.01364	1.90511	4.15517	5.07022	5.0314	5.22388	5.61405	5.06272	4.56865	5.07022	5.95214	4.38408	3.1957	4.86171	4.22114	4.50381	4.33671	3.91525	2.26382	4.91886	5.48305	1.06385	4.77896	4.87946	-1.4824	5.63523	2.59759	5.73111	4.7827	3.19786	5.45856	2.31347	4.83805	3.39558	4.91886	4.66726
hsa-miR-519e-5p	-1.71874	3.38375	-6.53602	4.00454e-10	1.57059e-09	11.9069	DOWN	-1.64092	5.37447	3.77986	6.47391	5.48305	4.58149	4.5186	5.35677	-0.361248	2.93589	-1.08331	5.38841	0.7507	3.89976	4.25593	3.0857	4.68378	5.45856	5.27523	3.6424	4.40978	5.02152	4.65073	4.71115	4.32914	4.71469	4.74443	2.89189	4.7678	4.25593	4.30392	4.28183	4.28898	-1.41896	4.99997	3.36322	5.42924	4.4028	4.29061	-1.50963	4.65639	6.20004
hsa-miR-520d-5p	-1.19562	2.83942	-4.60354	6.86086e-06	1.65863e-05	2.42659	DOWN	0.360883	-1.56057	5.13891	3.77799	-0.753	3.12178	4.46508	4.34713	4.43136	5.19608	-1.08331	5.36057	4.60103	5.4927	4.91039	4.53782	3.54125	5.40013	3.31154	4.87536	4.03615	4.64146	4.24049	4.20804	2.76633	3.96638	4.52056	4.6397	4.4391	3.30161	3.2808	2.85313	3.91718	3.80779	4.86777	1.68748	3.346	4.87536	4.08442	1.01573	5.01968	5.23433
hsa-miR-520f-5p	-1.424	2.35864	-5.02553	1.0065e-06	2.6753e-06	4.2767	DOWN	4.19923	4.40094	4.58149	4.56186	4.98823	4.56	3.57767	3.23967	-0.361248	4.85022	5.60834	5.32017	3.28687	3.20708	4.87536	-1.15718	-1.12207	4.1341	4.26405	5.22607	3.91125	3.94846	4.53782	3.68195	4.02047	4.84427	4.60472	4.94345	3.4032	4.48744	1.76657	5.30475	2.46918	1.84564	4.26405	-1.66395	3.58824	2.89601	3.94113	5.34274	-1.60817	5.94583
hsa-miR-520h	-1.80951	1.47237	-6.20537	2.50432e-09	9.13738e-09	10.1118	DOWN	2.11328	2.49239	2.49239	5.61951	4.41663	4.31472	3.4806	4.18132	-0.361248	-1.49655	-1.08331	3.13509	3.56816	-1.37441	-0.79222	4.22114	-1.12207	-1.67499	3.74377	4.67828	4.20627	2.9577	-1.29147	2.18335	1.85002	1.57707	3.33253	-1.57398	2.00561	3.90534	3.93754	-1.45027	1.36244	1.90973	-0.7093	0.542578	-0.884943	4.33486	2.40219	3.01555	-1.60817	2.96661
hsa-miR-524-5p	-2.52123	1.46526	-8.55714	1.6344e-15	1.05069e-14	24.1325	DOWN	-0.7093	1.12166	5.77261	5.15475	-0.753	5.09793	3.14218	4.3112	-0.361248	1.25657	-1.08331	3.65549	1.53316	4.61993	3.82233	5.04686	5.55739	4.48196	5.35209	4.88323	5.14877	3.40838	4.18812	1.74602	1.52047	-1.62534	4.40786	2.13661	3.75415	4.1185	2.26082	1.73948	1.75225	-1.41896	-0.7093	-0.85067	4.28183	4.63795	-1.66329	3.50839	-1.60817	4.96895
hsa-miR-526a	-1.04595	2.39048	-3.43695	0.000697702	0.00131492	-1.96107	DOWN	4.22473	5.73613	1.27578	-1.6019	3.72335	3.95618	-1.63632	3.13509	-0.361248	4.17379	-1.08331	-1.53249	3.73756	3.26986	4.06529	-1.15718	-1.12207	5.42924	5.12513	4.25173	1.88022	3.62258	3.27163	4.17568	2.23256	4.35079	3.08775	5.02336	3.52452	3.38779	5.04312	5.393	-1.61629	2.51349	-0.7093	5.47047	-0.884943	5.46811	5.02757	5.21062	2.88213	-1.14451
hsa-miR-532-5p	-1.19447	-0.480683	-5.5409	8.18283e-08	2.45772e-07	6.71058	DOWN	-1.64092	-1.56057	-1.63331	3.57552	-0.753	-1.33043	0.527146	1.74602	-0.361248	1.66883	3.31979	-1.53249	-1.59132	4.06529	-0.79222	-1.15718	4.95513	-0.694065	-0.0858261	-1.45183	2.4112	-1.054	-1.29147	2.92713	0.731387	-1.62534	-1.65392	-1.57398	-1.63472	4.03615	-1.4824	-1.45027	-1.61629	-1.41896	-0.7093	-1.66395	-0.884943	-1.66156	-1.06441	-1.50963	-1.60817	3.68952
hsa-miR-541-3p	-1.52255	0.510639	-5.74892	2.82908e-08	9.02562e-08	7.74455	DOWN	4.92069	-1.56057	2.23731	4.88135	-0.753	-1.33043	3.94298	-1.62016	-0.361248	-1.49655	5.14678	2.96235	3.94484	3.86417	-0.79222	-1.15718	-1.12207	2.98375	5.22607	-1.45183	4.34896	3.97192	4.17379	1.8407	1.35636	4.70383	3.51056	2.86657	-1.63472	-0.607285	-1.4824	2.03756	3.70551	2.43923	-0.7093	-0.317965	-0.884943	4.9377	3.9775	-1.50963	1.3306	-1.14451
hsa-miR-542-5p	2.13768	2.63344	7.68319	4.4099e-13	2.27918e-12	18.6049	UP	-1.64092	3.19108	-1.63331	3.5639	-0.753	-1.33043	2.1671	-1.62016	4.59673	4.24616	-1.08331	4.1848	4.2137	-1.37441	-0.79222	-1.15718	4.67828	4.76047	-1.63592	-1.45183	-1.63778	2.05373	3.3221	3.01747	4.94153	-1.62534	3.987	1.84564	3.43085	-1.64422	4.35079	3.99804	-1.61629	2.58651	-0.7093	3.70363	-0.884943	4.435	1.4012	1.60832	0.131809	-1.14451
hsa-miR-548ab	3.03228	0.648664	11.9289	7.18216e-26	9.49599e-25	47.7945	UP	-1.64092	2.86657	-1.63331	-1.6019	-0.753	4.48579	-1.63632	-1.62016	-0.361248	-1.49655	-1.08331	-1.53249	-1.59132	-1.37441	-0.79222	-1.15718	-1.12207	-1.67499	-1.63592	-1.45183	-1.63778	-1.59162	-1.29147	-1.57603	-1.66137	-1.62534	-0.480152	2.79693	-1.63472	-1.64422	-1.4824	-1.45027	-1.61629	-1.41896	-0.7093	-1.66395	-0.884943	-1.66156	-1.0117	-1.50963	1.36244	-1.14451
hsa-miR-548aj-3p	-1.27491	-0.290207	-5.17229	5.01548e-07	1.3715e-06	4.95074	DOWN	3.95618	-1.56057	3.67999	-1.6019	-0.753	-1.33043	0.471187	-1.62016	-0.361248	-1.49655	4.435	4.8173	-1.59132	-1.37441	-0.79222	-1.15718	-1.12207	-1.67499	-1.63592	-1.45183	3.02197	3.38417	-1.29147	4.27467	3.20186	4.28898	1.0543	2.78281	-1.63472	-1.64422	-1.4824	5.4757	3.25256	-1.41896	-0.7093	-1.66395	-0.884943	-1.66156	-1.66329	2.63375	8.46354	-1.14451
hsa-miR-548al	-1.07563	-0.338114	-4.57132	7.90264e-06	1.89974e-05	2.29081	DOWN	-1.64092	2.70088	4.5	-1.6019	-0.753	-1.33043	-1.63632	2.01998	4.85201	-1.49655	3.13987	0.828376	-1.59132	-1.37441	-0.79222	-1.15718	-1.12207	-1.67499	-1.63592	-1.45183	-1.63778	-1.67642	-1.29147	-1.57603	1.90292	-1.62534	-0.436817	3.31545	-1.63472	-1.64422	-1.4824	-1.45027	2.40806	5.16117	-0.7093	1.47629	-0.884943	2.33021	-1.66329	-1.50963	1.12166	-1.14451
hsa-miR-548ar-5p	-1.13329	0.154398	-4.01894	7.91689e-05	0.000170216	0.0894382	DOWN	1.50246	0.757757	2.30408	3.86934	-0.753	-1.33043	-1.63632	-1.62016	-0.361248	-1.49655	4.55091	2.92981	3.97192	-1.37441	4.0921	4.7827	-1.12207	-1.67499	2.34647	3.41764	0.468437	-1.59932	-1.29147	3.8263	3.07033	-1.62534	-1.65392	-1.57398	3.89261	-1.64422	-1.4824	2.49747	3.20002	-1.41896	4.0615	-1.66395	4.56694	0.767996	3.66512	-1.50963	0.198104	3.9321
hsa-miR-548av-3p	-1.0178	-0.728625	-5.15486	5.45214e-07	1.48143e-06	4.86989	DOWN	-1.64092	2.34864	-1.63331	-1.6019	4.47494	-1.33043	-0.5573	1.16171	-0.361248	-1.49655	-1.08331	4.97456	-1.59132	-1.37441	-0.79222	-1.15718	3.96448	-1.67499	-1.63592	3.03649	-1.63778	-1.67642	-1.29147	2.02191	-0.237839	0.40857	-1.65392	-1.57398	-1.63472	1.62802	2.2912	1.73508	3.43085	-1.41896	-0.7093	0.0223152	-0.884943	-0.900178	-1.66329	-1.50963	-1.60817	-1.14451
hsa-miR-548b-3p	-2.19351	0.706103	-7.29465	4.76812e-12	2.22368e-11	16.2596	DOWN	-1.64092	5.46575	1.44116	3.44543	-0.753	2.01998	2.78981	1.9939	4.78083	-1.49655	-1.08331	2.89601	2.01998	-1.37441	-0.79222	-1.15718	5.10893	4.10893	2.20206	4.84427	8.62172	4.10893	-1.29147	-1.57603	3.21483	4.17945	-1.65392	3.91911	2.66059	0.6918	-1.4824	-1.45027	-1.61629	-1.41896	-0.7093	1.90073	-0.884943	3.68195	2.25116	4.6985	1.69717	3.53429
hsa-miR-548bb-3p	-1.57564	-0.417527	-7.07925	1.72924e-11	7.78158e-11	14.9922	DOWN	-1.64092	-1.56057	0.23123	1.00394	-0.753	-1.33043	2.34264	-1.62016	4.74443	2.81717	4.09973	-1.53249	3.81167	2.46918	-0.79222	-1.15718	-1.12207	0.489909	-1.63592	-1.45183	-1.63778	0.524139	2.6536	0.465687	-0.110383	0.426196	1.25657	0.505543	-1.63472	-1.64422	-1.4824	-1.45027	-1.61629	-1.41896	-0.7093	-1.66395	-0.884943	-1.66156	-1.66329	-1.50963	1.4609	4.85201
hsa-miR-548d-5p	-1.69639	-0.105358	-6.7194	1.41104e-10	5.8002e-10	12.93	DOWN	-1.64092	4.48388	3.85405	7.12574	-0.753	-1.33043	-0.181974	2.59223	-0.361248	1.16171	-1.08331	6.03977	1.5818	-1.37441	-0.79222	-1.15718	2.91367	2.29345	3.28491	-1.45183	0.181761	1.47925	-1.29147	4.48579	-1.66137	-1.62534	-0.103561	-1.57398	0.584713	-1.64422	-1.4824	-1.45027	-1.61629	3.4337	-0.7093	0.3215	-0.884943	0.207609	-0.427133	-1.50963	-1.60817	4.83999
hsa-miR-548h-5p	-1.42446	-0.504241	-5.87866	1.43871e-08	4.78016e-08	8.40388	DOWN	-1.64092	1.86447	-1.63331	3.83347	-0.753	-1.33043	3.20539	-1.62016	-0.361248	1.13527	-1.08331	-1.53249	1.06385	-1.37441	-0.79222	-1.15718	-1.12207	2.26683	2.74067	1.3594	1.61827	-1.67642	-1.29147	-1.57603	-1.66137	3.73546	-1.65392	-1.57398	-1.63472	-1.64422	-1.4824	-1.45027	3.21939	-1.41896	-0.7093	7.77076	-0.884943	-0.503957	-1.66329	2.94675	-1.60817	3.70918
hsa-miR-548q	1.38943	4.90866	7.08861	1.63583e-11	7.37419e-11	15.0468	UP	3.4806	-1.56057	4.13629	2.714	5.36288	-1.33043	4.79822	5.46811	4.20255	5.46811	4.34713	4.79822	4.46335	5.57283	4.72018	4.69478	3.55067	3.47604	3.97554	3.1445	5.5058	5.58763	5.74847	5.4927	5.24986	4.70739	4.98038	4.09973	5.3378	4.87536	5.10526	5.48829	3.6089	4.15899	-0.7093	4.90225	4.85201	5.66031	5.10893	4.40094	5.53037	2.75824
hsa-miR-548s	-1.92383	0.923996	-6.04894	5.83035e-09	2.04301e-08	9.2857	DOWN	-1.64092	3.33253	0.108926	6.05458	3.52087	3.61803	3.02197	3.70739	4.08442	4.42444	4.99997	4.44298	2.98562	2.72795	-0.79222	2.61326	4.41143	4.27467	-1.63592	-1.45183	4.49633	2.03519	-1.29147	-1.57603	-1.66137	3.96638	-0.88347	0.511374	3.00556	-1.64422	-1.4824	-1.45027	3.16151	-1.41896	-0.7093	-1.66395	-0.884943	-1.06193	4.11309	-1.50963	-1.60817	-1.14451
hsa-miR-548w	-1.78415	0.17382	-5.98337	8.27303e-09	2.85603e-08	8.94393	DOWN	-1.64092	1.39618	-0.13057	3.77799	8.80225	5.03547	2.66741	-1.62016	-0.361248	4.57035	2.68672	4.39909	1.8247	4.42771	-0.79222	-1.15718	-1.12207	-1.67499	4.94937	-1.45183	-1.63778	-1.6106	2.89601	-1.57603	-1.66137	-1.62534	-1.65392	-1.57398	-1.63472	-1.64422	-1.4824	1.3739	3.24299	-1.41896	-0.7093	-1.66395	-0.884943	2.78077	-1.66329	-1.50963	-1.60817	4.64901
hsa-miR-548x-3p	-1.02232	0.0970352	-3.83644	0.000161153	0.000333891	-0.58398	DOWN	-1.64092	-1.56057	0.0720478	-1.6019	-0.753	-1.33043	2.59223	-1.62016	-0.361248	3.10723	-1.08331	-1.53249	2.5443	2.59223	3.65928	3.2772	-1.12207	-1.67499	-1.63592	3.51672	4.27467	-1.42721	3.56816	1.65189	-1.66137	1.74914	3.40098	4.49081	0.169196	1.47925	-1.4824	-1.45027	4.1149	2.75824	-0.7093	1.70991	-0.884943	3.63781	4.38088	3.9303	-1.60817	-1.14451
hsa-miR-550a-3p	1.56126	1.64519	5.74949	2.8207e-08	9.01007e-08	7.74744	UP	4.46998	1.23051	-1.63331	1.03253	-0.753	-1.33043	2.72349	4.65996	-0.361248	3.5317	-1.08331	-1.53249	3.41525	1.90292	-0.79222	-1.15718	4.35659	-1.67499	-1.63592	-1.45183	3.31545	2.51349	-1.29147	1.58451	1.69239	0.267035	2.08821	-1.57398	-0.29677	1.45453	4.26017	2.86215	2.33482	2.67202	-0.7093	1.04514	-0.884943	1.44863	2.4432	1.90292	-1.60817	-1.14451
hsa-miR-550b-3p	2.04013	0.96503	7.69451	4.11011e-13	2.12978e-12	18.6744	UP	-0.0858261	2.55954	-1.63331	5.22607	-0.753	-1.33043	-1.63632	0.761002	-0.361248	-1.49655	4.39714	-1.53249	3.34808	-1.37441	-0.79222	-1.15718	2.64823	0.609483	-1.63592	-1.45183	-0.386083	0.0743348	-1.29147	-1.57603	4.61624	-1.62534	1.36244	-1.57398	1.74914	0.619265	4.56371	1.86231	4.74857	-1.41896	-0.7093	-1.66395	-0.884943	0.335133	-1.66329	-1.50963	2.62847	-1.14451
hsa-miR-551a	1.51063	1.66649	5.62284	5.40306e-08	1.66373e-07	7.11442	UP	4.35659	3.14218	1.18146	4.20804	-0.753	-1.33043	4.30568	-1.62016	-0.361248	-1.49655	-1.08331	-1.53249	1.96437	-1.37441	3.78836	3.11725	-1.12207	-1.03124	1.72152	-1.45183	2.86872	-1.67642	-1.29147	2.70088	2.50615	2.47091	-1.65392	0.839361	3.4989	-1.64422	-1.4824	-1.45027	-1.61629	2.60332	-0.7093	-1.66395	-0.884943	1.40669	3.72577	3.08775	2.6986	-1.14451
hsa-miR-551b-5p	-1.89807	4.7824	-10.0954	4.39558e-20	3.86119e-19	34.5576	DOWN	4.96071	2.88624	6.32807	5.53804	5.55209	5.02757	5.5058	5.47284	6.3698	5.97244	5.85785	6.64345	6.28646	6.03368	6.65388	6.05458	4.88901	5.90175	6.35197	5.90816	5.69069	5.80852	6.30758	6.05458	5.92365	6.14787	6.13301	6.1883	6.18432	6.28217	6.11074	6.81292	6.954	3.74582	-0.7093	5.71924	6.43103	6.69116	5.92365	6.954	6.23772	4.90824
hsa-miR-555	-1.65209	-0.226758	-6.86893	5.94694e-11	2.53808e-10	13.7783	DOWN	-1.64092	2.6536	3.11518	3.83797	-0.753	4.70383	2.43923	-0.110383	-0.361248	1.51353	-1.08331	1.36244	3.11312	-1.37441	-0.79222	-1.15718	-1.12207	-1.39921	3.49118	-1.45183	1.35242	2.39393	3.07033	-1.57603	-1.66137	-1.62534	-1.65392	-1.57398	-1.63472	-1.64422	-1.4824	-1.45027	-0.146817	-1.41896	-0.7093	0.853713	-0.884943	1.94437	-1.66329	3.87816	-1.60817	5.52794
hsa-miR-556-3p	-1.33283	-0.0630751	-5.00634	1.10126e-06	2.9091e-06	4.18972	DOWN	-1.64092	3.95435	1.63113	6.40032	-0.753	3.97192	3.3901	-1.62016	-0.361248	-1.49655	-1.08331	4.96071	3.60072	-1.37441	-0.79222	3.02962	-1.12207	3.22967	-1.63592	-1.45183	2.44121	-0.625026	-1.29147	-1.57603	-1.66137	-1.62534	3.75001	-1.57398	-1.63472	-1.64422	-1.4824	-1.45027	-1.61629	-1.41896	-0.7093	2.97336	-0.884943	2.24219	-1.66329	-1.50963	-1.60817	-1.14451
hsa-miR-5571-3p	-1.23964	0.431306	-4.57168	7.89021e-06	1.89974e-05	2.29232	DOWN	-1.64092	-1.56057	6.22958	-1.6019	3.68392	-1.33043	-1.63632	-1.62016	-0.361248	2.20953	3.73546	-1.53249	5.08975	2.4432	-0.79222	3.053	5.2149	-1.67499	-0.259335	4.93023	-1.63778	2.66741	2.78484	3.71302	1.00713	3.31154	4.25593	1.78267	3.05507	3.37149	-1.4824	-1.45027	1.93491	2.88802	-0.7093	-1.66395	4.28898	-1.66156	4.01677	-1.50963	0.983343	-1.14451
hsa-miR-5579-5p	-1.14163	-0.746596	-5.85911	1.59409e-08	5.26912e-08	8.30383	DOWN	-1.64092	1.18146	-1.63331	3.68195	-0.753	2.82176	2.54684	2.33698	-0.361248	-1.49655	-1.08331	2.61796	-1.59132	-1.37441	-0.79222	4.10662	3.22132	-0.884943	-1.63592	-1.45183	-0.294657	1.1475	-1.29147	0.539611	0.153826	-1.62534	-1.65392	-1.57398	-1.63472	-0.24092	-1.4824	-1.45027	-1.61629	-1.41896	-0.7093	-1.66395	-0.884943	-1.66156	-1.66329	1.74275	-1.60817	3.83971
hsa-miR-5581-3p	2.2524	1.64946	8.85676	2.23722e-16	1.5426e-15	26.0996	UP	0.900417	3.31979	-1.63331	-1.6019	-0.753	-1.33043	3.9831	1.6607	-0.361248	-1.49655	-1.08331	-1.53249	3.97947	-1.37441	-0.79222	-1.15718	-1.12207	-0.760383	1.93491	-1.45183	2.0171	3.44543	3.73966	-1.57603	-1.66137	-1.62534	2.04498	3.94846	-1.63472	1.8549	-1.4824	2.37276	-1.61629	4.46162	-0.7093	-0.100811	-0.884943	-1.66156	0.886648	-1.50963	4.22473	-1.14451
hsa-miR-5581-5p	2.39435	2.18466	8.08959	3.39743e-14	1.92796e-13	21.1342	UP	3.09649	-1.56057	2.84466	0.947926	-0.753	-1.33043	0.309707	-1.62016	-0.361248	1.91243	3.37149	-1.53249	2.74543	-1.37441	-0.79222	-1.15718	-1.12207	1.31948	3.90918	-1.45183	2.57751	1.29488	-1.29147	3.33253	3.38779	1.49731	4.79622	1.36851	-1.63472	2.30408	-1.4824	-1.45027	4.44298	4.67468	-0.7093	3.46469	4.27811	-1.66156	3.29069	-1.50963	3.11952	-1.14451
hsa-miR-5584-3p	1.72803	1.01935	6.40366	8.40412e-10	3.17008e-09	11.1805	UP	1.6364	3.87447	2.15987	-1.6019	-0.753	-1.33043	-1.63632	-1.62016	-0.361248	-1.49655	-1.08331	-1.53249	-1.59132	-1.37441	-0.79222	2.88624	-1.12207	3.6916	2.97973	-1.45183	-1.63778	0.269111	-1.29147	-1.57603	-1.66137	-1.62534	3.66108	2.83197	2.75407	1.36547	2.79452	3.02962	3.80973	-1.41896	-0.7093	3.72577	-0.884943	2.92981	0.900417	1.87797	-1.60817	-1.14451
hsa-miR-5585-3p	1.25749	4.32246	4.35031	2.04171e-05	4.70107e-05	1.38114	UP	-0.627309	-1.56057	5.19381	4.92449	-0.753	5.61951	5.76033	5.32442	-0.361248	5.36518	5.96213	-1.53249	5.35677	-1.37441	4.24049	6.33954	-1.12207	1.27578	2.86657	4.67828	5.75728	4.48579	4.96502	4.82505	5.05699	2.26382	8.13403	6.46485	4.56694	2.19659	2.97524	3.84871	3.39241	-1.41896	8.37758	-0.679843	4.71115	0.350061	5.29597	5.02547	6.44735	4.14713
hsa-miR-5585-5p	-1.54574	-0.504845	-7.06281	1.90603e-11	8.51737e-11	14.8965	DOWN	-1.64092	-1.56057	4.46838	-1.6019	-0.753	4.61624	3.05507	2.35773	-0.361248	-1.49655	-1.08331	2.77628	-1.59132	-1.37441	-0.79222	-1.15718	-1.12207	-1.67499	2.03283	-1.45183	1.97928	-1.50517	-1.29147	1.70551	4.05975	0.8355	0.40857	1.53817	-1.63472	-1.64422	-1.4824	1.67337	3.85207	-1.41896	-0.7093	2.09333	3.57552	-0.890978	-1.66329	4.90608	-1.60817	2.75019
hsa-miR-5586-3p	-1.64345	0.428363	-5.83185	1.83843e-08	6.02244e-08	8.16474	DOWN	-1.64092	1.0872	3.09419	5.73613	-0.753	4.5	3.43085	2.08821	-0.361248	3.05715	3.37506	6.47391	3.65363	3.09858	-0.79222	3.13987	-1.12207	0.521113	2.15508	4.22114	3.98505	3.01176	2.8016	3.94484	-0.336661	3.74171	1.48542	2.54188	3.20539	4.0037	-1.4824	2.74067	4.03615	-1.41896	-0.7093	1.06068	-0.884943	2.21163	3.20917	-1.50963	-1.60817	-1.14451
hsa-miR-5587-3p	1.37368	2.53019	4.95291	1.41292e-06	3.68308e-06	3.94894	UP	2.15987	2.43383	3.84871	-1.6019	-0.753	-1.33043	4.22873	-0.13057	-0.361248	-1.49655	3.86757	4.34023	-1.59132	4.25173	-0.79222	-1.15718	-1.12207	3.42183	1.64125	4.17379	1.10787	2.29345	-1.29147	4.88323	4.26017	4.59265	4.09973	3.95435	1.90292	2.45891	1.42763	1.65189	0.578639	2.01421	4.11101	2.67497	3.41286	1.93717	4.72972	4.0689	4.02242	4.20804
hsa-miR-5587-5p	-2.49398	0.846591	-8.32203	7.59921e-15	4.62992e-14	22.6134	DOWN	-0.662148	5.07022	-1.63331	0.560822	-0.753	-1.33043	4.02437	3.80779	-0.361248	3.74377	4.65245	4.09973	2.17882	4.54526	-0.79222	-1.15718	-1.12207	0.89667	3.4623	-1.45183	4.07083	5.06672	5.11918	2.23036	3.57981	4.01677	-1.65392	4.48579	4.66174	3.987	4.19923	5.02336	4.36646	4.1274	-0.7093	4.34212	-0.884943	3.41764	4.38611	-1.50963	-1.60817	3.51672
hsa-miR-5588-3p	1.20168	0.993691	4.3211	2.30837e-05	5.26777e-05	1.26378	UP	2.60332	-1.56057	0.286152	4.45211	-0.753	-1.33043	1.02527	0.256787	4.35079	3.16633	-1.08331	-1.53249	2.34455	-1.37441	-0.79222	3.60072	-1.12207	3.84144	3.15073	2.20483	-1.63778	-1.30201	-1.29147	4.7908	-1.66137	3.44125	-1.65392	4.46998	2.87754	0.0507304	-1.4824	-1.45027	3.10502	-1.41896	-0.7093	2.51621	4.14713	-1.66156	-0.21117	-1.50963	-1.60817	-1.14451
hsa-miR-5589-5p	2.02374	2.25778	6.88082	5.54918e-11	2.37227e-10	13.8463	UP	3.12419	-1.56057	4.63618	-1.6019	-0.753	-1.33043	4.59673	-1.62016	-0.361248	3.17952	3.99265	-1.53249	-1.59132	-1.37441	3.69758	-1.15718	-1.12207	-1.29925	5.9384	4.01862	2.47264	3.24299	-1.29147	4.07671	4.77342	4.38611	-1.65392	-1.57398	4.35456	4.30568	3.00988	2.1105	-1.61629	-1.41896	-0.7093	-1.66395	-0.884943	0.489909	1.90973	-1.50963	5.33351	-1.14451
hsa-miR-5591-3p	-1.00349	0.246554	-4.02712	7.6639e-05	0.000165054	0.120281	DOWN	-1.64092	0.91977	-0.121128	3.85405	-0.753	5.04686	3.48906	2.96661	-0.361248	-1.49655	-1.08331	1.76169	-1.59132	-1.37441	-0.79222	-1.15718	2.90838	0.821593	-0.248661	-1.45183	2.84466	1.65816	-1.29147	0.886648	-1.66137	-1.62534	0.0626413	-1.57398	-1.63472	0.892922	-1.4824	-1.45027	1.07646	-1.41896	-0.7093	-1.66395	-0.884943	1.03253	0.29478	4.32398	0.0855217	4.33671
hsa-miR-5591-5p	-1.54359	-0.657316	-7.83601	1.69622e-13	9.1596e-13	19.5472	DOWN	-1.64092	2.03756	3.72335	0.252383	-0.753	3.75616	3.06573	-1.62016	-0.361248	3.88913	-1.08331	-1.53249	3.61566	-1.37441	-0.79222	-1.15718	-1.12207	1.90742	1.28821	-1.45183	2.39171	-1.67642	-1.29147	-1.57603	-1.66137	-1.62534	-1.65392	-1.57398	-1.63472	-1.64422	4.46838	-1.45027	2.19929	-1.41896	-0.7093	1.89233	-0.884943	0.108926	-1.66329	1.43015	-1.60817	4.53586
hsa-miR-561-5p	-1.20345	-0.763032	-6.15768	3.24527e-09	1.17241e-08	9.85831	DOWN	-1.64092	-1.56057	-1.63331	-1.6019	-0.753	3.02197	-1.63632	1.42511	-0.361248	-1.49655	-1.08331	-1.53249	2.58	-1.37441	-0.79222	-1.15718	3.16151	-0.731009	-1.63592	3.21483	-1.63778	0.757757	-1.29147	-1.57603	-0.896493	-0.161563	-1.65392	-1.57398	-1.63472	-1.64422	-1.4824	-1.45027	-1.61629	-1.41896	-0.7093	0.153826	-0.884943	-1.66156	3.06136	3.06354	-1.60817	-1.14451
hsa-miR-564	1.5149	4.88413	8.25422	1.17895e-14	7.00004e-14	22.1795	UP	5.58256	4.60103	4.26767	5.48305	5.05512	5.02336	3.95049	4.42771	-0.361248	5.12913	-1.08331	3.16151	3.1957	5.3378	5.34274	-1.15718	3.95251	2.79693	4.80954	4.1397	3.23165	5.56246	4.98038	5.43913	5.30684	4.43136	2.86872	4.58323	4.33671	5.27523	4.47655	2.38649	2.70993	5.22388	4.76047	5.47047	3.73966	4.82126	3.36727	-1.50963	5.15252	4.61624
hsa-miR-5681a	-1.48628	-0.334486	-6.23296	2.15421e-09	7.89363e-09	10.2591	DOWN	5.08603	-1.56057	-1.63331	-1.6019	-0.753	-1.33043	0.926826	-1.62016	-0.361248	-1.49655	5.42476	-1.53249	-1.59132	-1.37441	-0.79222	-1.15718	-1.12207	1.2698	4.1274	-1.45183	-1.63778	-1.67642	3.66955	-1.57603	1.95632	-0.310426	3.68744	-1.57398	1.69934	1.54313	1.50246	-1.45027	2.76263	1.93943	3.68744	1.19742	-0.884943	-0.645922	2.08821	-1.50963	7.75579	-1.14451
hsa-miR-5681b	1.38368	0.430631	5.58807	6.44713e-08	1.96221e-07	6.94249	UP	1.34287	4.39519	-1.63331	-1.6019	-0.753	3.45387	-1.63632	-1.62016	-0.361248	-1.49655	-1.08331	-1.53249	1.02202	-1.37441	-0.79222	-1.15718	-1.12207	-0.542591	-1.63592	-1.45183	-1.63778	1.03858	3.61566	1.76169	0.685339	-1.62534	-1.65392	1.29774	-1.63472	-1.64422	3.85604	-1.45027	1.26318	-1.41896	-0.7093	1.20832	-0.884943	-1.66156	3.57981	-1.50963	1.52385	-1.14451
hsa-miR-5685	1.12999	1.94222	3.92837	0.000113012	0.000238992	-0.248158	UP	3.0919	-1.56057	3.14822	4.57768	-0.753	-1.33043	3.56173	-1.62016	7.78486	2.94675	-1.08331	2.9405	1.89233	4.20982	-0.79222	3.9245	-1.12207	-0.17287	-1.63592	1.4012	3.07272	2.73631	-1.29147	3.6089	-0.0858261	0.47727	3.40838	4.93023	2.69633	3.46708	4.23067	2.11964	4.33486	-1.41896	-0.7093	1.73728	5.22825	-1.66156	4.8286	-1.50963	4.64327	-1.14451
hsa-miR-5690	-1.3564	0.567597	-4.55247	8.58072e-06	2.0474e-05	2.21177	DOWN	-1.64092	1.94437	-0.0677913	4.06709	5.30684	-1.33043	1.94678	3.00772	-0.361248	-1.49655	3.86757	5.37693	1.05107	-1.37441	3.58824	4.3701	-1.12207	4.17757	-1.63592	2.97973	-0.305335	-1.67642	-1.29147	-1.57603	3.75415	4.344	-1.65392	2.35081	0.548735	-1.64422	1.37847	-1.45027	2.16924	-1.41896	-0.7093	-0.67113	-0.884943	-1.66156	-1.66329	2.17636	-1.60817	4.57222
hsa-miR-5691	-1.11703	-0.45319	-4.46105	1.2746e-05	3.00216e-05	1.83223	DOWN	-1.64092	0.805439	3.20002	4.84843	-0.753	-1.33043	-1.63632	-1.62016	-0.361248	2.17882	3.03438	4.86379	4.42444	-1.37441	4.13191	-1.15718	-1.12207	-1.67499	-0.526717	3.12659	-1.63778	0.731387	-1.29147	-1.57603	2.96235	-1.62534	-1.65392	-1.57398	-1.63472	-1.64422	2.7052	4.61198	-1.61629	-1.41896	-0.7093	2.56445	-0.884943	3.41286	-1.66329	-1.50963	1.3739	-1.14451
hsa-miR-5692a	-1.66591	-0.00692543	-6.353	1.11322e-09	4.1685e-09	10.9052	DOWN	-1.64092	-1.56057	-1.63331	2.75019	-0.753	-1.33043	2.55954	4.12405	-0.361248	2.66741	3.65549	4.5339	2.6206	-1.37441	3.53429	2.64823	-1.12207	-0.480152	-1.63592	2.78981	2.92444	-0.216552	-1.29147	-1.57603	-1.66137	3.92272	0.815107	0.821593	1.36244	4.35079	-1.4824	2.32311	4.17568	-1.41896	-0.7093	-0.216552	-0.884943	-0.153026	-1.66329	2.76263	-1.60817	-1.14451
hsa-miR-5692b	-2.95573	0.899484	-9.90221	1.71462e-19	1.45149e-18	33.2073	DOWN	-1.64092	3.69559	0.309707	6.88227	-0.753	4.42046	4.03615	0.573509	-0.361248	-1.49655	3.19786	3.66512	4.27126	2.92444	5.0818	3.62258	-1.12207	4.64705	3.82987	4.96502	-1.63778	-0.495635	3.44543	4.35456	3.52452	-1.62534	2.5333	1.35636	-1.63472	3.04588	-1.4824	-1.45027	2.77184	-1.41896	-0.7093	2.96448	4.94937	1.25053	-1.66329	4.48744	-1.60817	6.68167
hsa-miR-5695	-1.08945	-0.26827	-4.1396	4.87962e-05	0.000107159	0.549622	DOWN	1.06997	5.53277	0.853713	4.26767	-0.753	3.19786	3.82987	-1.62016	-0.361248	-1.49655	-1.08331	2.87528	1.76922	-1.37441	-0.79222	2.75019	5.17332	-1.67499	-1.63592	-1.45183	-1.63778	-1.67642	-1.29147	1.77187	-1.66137	-1.62534	-1.65392	-1.57398	-1.63472	-1.64422	-1.4824	-1.45027	-1.61629	5.68229	-0.7093	1.19742	5.20043	-1.66156	-0.964513	-1.50963	-1.60817	-1.14451
hsa-miR-5696	-1.13533	0.582778	-4.08002	6.20534e-05	0.000134773	0.320914	DOWN	5.20672	-1.56057	4.33671	-1.6019	-0.753	-1.33043	3.26271	2.86215	-0.361248	4.93422	4.97835	2.27166	-1.59132	4.57409	-0.79222	-1.15718	-1.12207	3.16847	1.12166	3.24299	3.17952	3.13987	3.86934	4.52434	0.812139	4.47159	1.53817	4.40094	1.3739	2.76263	-1.4824	3.38779	-1.61629	2.25342	-0.7093	2.55161	-0.884943	-1.08153	-1.66329	-1.50963	4.08783	3.02197
hsa-miR-5698	2.40333	5.76923	12.8372	8.00444e-29	1.20773e-27	54.5588	UP	4.41143	1.07321	5.27092	1.95156	5.99264	4.73713	4.91455	4.46838	5.10526	5.52551	-1.08331	5.9208	4.42771	2.77406	5.2542	6.41283	-1.12207	4.46508	5.26021	4.90225	5.18357	5.40908	5.66864	5.38841	5.09793	5.61119	4.83999	5.84298	4.65639	5.51554	5.58763	6.51448	6.43103	-1.41896	5.35867	4.7888	5.69069	5.22825	4.78681	5.55474	5.2662	3.83971
hsa-miR-5703	1.11678	2.37555	3.94037	0.000107845	0.000229434	-0.20381	UP	2.48213	5.78136	4.63618	-1.6019	4.00557	-1.33043	3.97192	3.32441	-0.361248	-1.49655	2.88446	2.20206	4.23262	-1.37441	4.33671	-1.15718	3.4989	-1.11748	2.26683	4.48908	-0.19415	2.78484	4.80192	3.66287	1.924	1.70152	4.58149	-1.57398	3.91718	3.60072	4.96287	4.62652	3.7621	-1.41896	-0.7093	4.02242	-0.884943	1.95392	2.76448	4.01313	2.00072	-1.14451
hsa-miR-5704	-1.54187	0.512723	-5.40448	1.61754e-07	4.70942e-07	6.0483	DOWN	-1.64092	4.32914	0.603696	6.49207	-0.753	5.73111	4.95312	1.9492	-0.361248	1.22297	5.52551	2.2231	3.9303	-1.37441	-0.79222	-1.15718	2.88446	-0.281507	-1.63592	3.40838	2.45635	-0.991578	-1.29147	3.34105	2.87307	0.845578	3.00556	0.821593	0.640874	1.84783	1.31294	-1.45027	4.05801	-1.41896	-0.7093	-1.66395	4.39345	2.83197	-1.66329	4.87348	4.56	5.9113
hsa-miR-5706	-1.59056	-0.319996	-6.47677	5.58749e-10	2.1359e-09	11.5804	DOWN	-1.64092	2.84071	-1.63331	2.8016	-0.753	2.09333	-1.63632	-1.62016	-0.361248	-1.49655	5.23433	5.69902	3.07847	-1.37441	-0.79222	-1.15718	4.23676	-1.67499	-1.63592	4.59265	-1.63778	2.76448	-1.29147	-1.57603	1.75743	-1.62534	3.71098	-1.57398	3.23165	-1.64422	-1.4824	-1.45027	2.63887	-1.41896	-0.7093	2.2231	-0.884943	-1.66156	-1.66329	1.18146	-1.60817	-1.14451
hsa-miR-5707	-1.44322	0.607944	-5.14576	5.69481e-07	1.54573e-06	4.82772	DOWN	1.09069	-1.56057	-1.63331	4.13191	-0.753	2.92981	3.91125	2.99194	-0.361248	3.87447	-1.08331	1.30401	-1.59132	-1.37441	-0.79222	3.50839	-1.12207	4.23469	4.00182	-1.45183	1.54313	2.85313	2.4432	2.80605	4.08442	-1.62534	1.8407	0.474228	4.50942	1.28821	2.84466	3.76625	0.00253478	2.69633	4.27126	-1.66395	-0.884943	0.983343	-1.66329	3.97373	1.42511	5.32916
hsa-miR-571	-1.62	0.307116	-5.83937	1.76758e-08	5.80517e-08	8.20307	DOWN	-1.64092	1.47333	-1.63331	4.4578	-0.753	4.44634	2.5088	4.24992	-0.361248	2.00561	-1.08331	3.37327	4.19748	2.29957	-0.79222	3.65549	-1.12207	-0.0764391	3.75415	2.08821	-1.63778	3.25453	-1.29147	-1.57603	-1.66137	-1.62534	1.38163	-1.57398	-1.63472	-1.64422	-1.4824	-1.45027	-1.61629	-1.41896	-0.7093	-0.972891	-0.884943	4.32398	-1.66329	-1.50963	-1.60817	4.46162
hsa-miR-572	1.07687	4.502	5.30211	2.67587e-07	7.57573e-07	5.55973	UP	1.84564	3.64951	2.22088	6.35197	4.12405	6.00583	4.3701	4.77896	5.34274	4.40786	4.69289	5.78394	5.25614	4.90608	5.50161	4.51463	-1.12207	5.21062	2.22088	2.88213	3.20708	4.31856	4.31856	-1.57603	4.43136	5.02757	2.64823	2.64347	1.98383	2.86657	4.17023	-1.45027	4.65996	-1.41896	-0.7093	1.25053	-0.884943	4.94937	4.68938	3.12659	1.46713	4.83611
hsa-miR-573	-1.13259	-0.14094	-4.12376	5.20297e-05	0.000113818	0.488536	DOWN	-0.186735	-1.56057	-1.63331	2.18604	-0.753	-1.33043	-0.261646	1.4012	-0.361248	-1.49655	-1.08331	4.46838	-1.59132	1.87797	-0.79222	-1.15718	-1.12207	-1.67499	-1.63592	1.75225	-1.63778	-1.67642	-1.29147	-1.57603	-1.66137	-1.62534	-1.65392	-1.57398	-1.63472	-1.64422	-1.4824	-1.45027	1.16171	-1.41896	-0.7093	-1.66395	-0.884943	-1.66156	-1.66329	1.16472	-1.60817	-1.14451
hsa-miR-574-3p	1.56533	4.50974	7.67688	4.58635e-13	2.35751e-12	18.5663	UP	2.7052	4.07867	5.41127	4.5019	3.60072	4.71115	4.48908	5.53518	-0.361248	4.96071	3.58418	5.01212	4.4391	3.55274	5.6742	-1.15718	-1.12207	4.79422	3.36938	4.71115	4.28183	4.72599	5.50835	1.02202	4.35659	4.51115	2.43923	4.6858	5.31574	5.21062	4.95312	5.06272	5.41586	5.08391	-0.7093	4.58149	-0.884943	3.1957	3.67564	3.87816	2.02864	2.55384
hsa-miR-574-5p	2.2042	2.99795	7.72061	3.49336e-13	1.82494e-12	18.8347	UP	0.489909	1.11133	1.31948	4.94153	-0.753	-1.33043	3.18369	3.4561	-0.361248	-1.49655	-1.08331	-1.53249	2.97147	3.346	8.73805	-1.15718	-1.12207	-0.398935	0.873235	-1.45183	3.57552	0.91977	3.71506	-1.57603	-1.66137	-1.62534	0.174035	1.4449	-0.0826413	1.70152	4.1274	-1.45027	4.64509	5.38365	-0.7093	4.93422	4.26586	4.41663	3.346	5.58763	-1.60817	-1.14451
hsa-miR-575	3.40966	5.9768	17.7926	3.62426e-45	1.29114e-43	92.0511	UP	5.64091	4.26017	2.78981	5.38603	4.61198	3.35015	4.56	4.87536	-0.361248	4.78083	5.01773	4.59673	4.72599	4.98447	4.46162	4.62289	4.0343	5.04499	4.97456	5.3701	4.36646	5.08603	6.20364	4.92252	5.14877	5.30265	5.40243	4.90824	0.179817	4.83233	4.22114	-1.45027	1.59817	6.29462	6.73041	3.46469	5.18562	5.10893	4.26017	4.98038	-1.60817	4.61198
hsa-miR-584-3p	1.20764	0.206205	4.92093	1.63869e-06	4.25429e-06	3.8058	UP	-1.64092	-1.56057	3.42626	-1.6019	-0.753	2.23731	1.80332	-0.191865	-0.361248	-1.49655	-1.08331	-1.53249	-1.59132	-1.37441	-0.79222	-1.15718	-1.12207	-1.16101	-0.254783	-1.45183	2.05059	-1.67642	-1.29147	2.46918	-1.66137	-1.62534	-1.65392	-1.57398	4.58883	-1.64422	-1.4824	-1.45027	4.97087	-1.41896	-0.7093	-1.66395	-0.884943	-1.66156	-1.66329	2.12962	-1.60817	-1.14451
hsa-miR-585-5p	2.51165	2.8585	9.72151	6.06703e-19	4.87835e-18	31.9542	UP	0.685339	5.09793	3.89976	-1.6019	-0.753	5.2149	1.61497	2.97749	4.38813	-1.49655	-1.08331	-1.53249	3.19108	4.27811	-0.79222	-1.15718	2.6084	2.96448	4.4028	3.84496	1.73728	3.57981	-1.29147	3.20708	4.4391	2.29345	1.57093	4.31664	1.64125	2.11328	4.17568	4.66539	0.127491	-1.41896	-0.7093	2.07611	-0.884943	4.35862	3.67999	-1.50963	4.19177	-1.14451
hsa-miR-586	-2.6847	1.22936	-8.54155	1.81089e-15	1.16123e-14	24.0311	DOWN	-1.64092	4.15331	3.9303	6.29054	-0.753	3.85207	3.0278	4.63442	4.5186	2.32311	-1.08331	4.33671	0.511374	2.31347	-0.79222	-1.15718	5.04873	4.85404	1.91952	4.79251	2.44836	-1.6179	-1.29147	2.40219	3.40838	3.23165	2.6937	-1.57398	1.16171	3.4623	-1.4824	-1.45027	2.18873	-1.41896	-0.7093	3.02197	-0.884943	3.3901	-1.66329	6.73041	-1.60817	5.07821
hsa-miR-587	-1.51622	-0.133148	-5.67939	4.04709e-08	1.26287e-07	7.39576	DOWN	-1.64092	3.08106	1.81656	-1.6019	-0.753	-1.33043	-1.63632	5.169	-0.361248	4.18306	2.77184	1.9492	3.66287	-1.37441	-0.79222	-1.15718	10.2185	-0.305335	0.0170087	-1.45183	-1.63778	-1.62342	-1.29147	-1.57603	-0.948035	2.54188	-0.898087	-1.57398	-1.63472	0.818074	-1.4824	2.15227	-1.61629	-1.41896	-0.7093	0.900417	3.80361	-1.66156	-1.66329	4.83233	0.849646	-1.14451
hsa-miR-588	-1.09631	-0.482651	-4.52492	9.67392e-06	2.29119e-05	2.09669	DOWN	-1.64092	-1.56057	-1.63331	-1.6019	-0.753	3.88376	2.92713	-1.62016	-0.361248	-1.49655	-1.08331	5.24572	-1.59132	-1.37441	-0.79222	-1.15718	-1.12207	-1.67499	-1.63592	-1.45183	-1.63778	-1.67642	-1.29147	-1.57603	-0.599172	-0.042313	-1.65392	-1.57398	-1.63472	4.08997	-1.4824	-1.45027	0.715843	-1.41896	-0.7093	-0.164161	-0.884943	3.3373	-1.66329	3.36083	0.324246	-1.14451
hsa-miR-590-5p	-1.09429	-0.256411	-4.41721	1.53761e-05	3.58543e-05	1.65251	DOWN	-1.64092	-1.56057	-1.63331	4.0488	-0.753	-1.33043	1.13527	3.8711	4.13629	-1.49655	-1.08331	-1.53249	2.53946	-1.37441	4.22873	-1.15718	-1.12207	3.65363	-1.63592	-1.45183	-1.63778	-1.67642	-1.29147	0.551326	-1.66137	-1.62534	3.76843	1.02202	-1.63472	-1.64422	2.05973	-1.45027	-1.61629	5.50161	-0.7093	1.9492	-0.884943	-1.66156	-1.66329	-1.50963	2.38649	-1.14451
hsa-miR-591	1.06156	0.0754031	4.62123	6.34655e-06	1.54595e-05	2.50146	UP	-0.589017	-1.56057	-1.63331	-1.6019	-0.753	-1.33043	3.55274	0.6671	-0.361248	2.09829	-1.08331	-1.53249	-1.59132	-1.37441	-0.79222	-1.15718	-1.12207	0.0659652	-1.63592	-1.45183	-0.092	-1.67642	-1.29147	-1.57603	-1.66137	-1.62534	-1.65392	1.95392	-0.436817	-1.64422	-1.4824	-1.45027	1.88488	3.36525	-0.7093	3.13509	-0.884943	-1.66156	-0.386083	-1.50963	2.74067	-1.14451
hsa-miR-592	-1.34333	0.0858572	-5.00576	1.10427e-06	2.91405e-06	4.18708	DOWN	3.35843	-1.56057	3.71302	3.87816	-0.753	4.04706	-0.443174	-1.62016	-0.361248	3.57552	-1.08331	-1.53249	2.80384	4.71469	3.50839	-1.15718	3.28883	2.41758	-1.63592	1.61497	-1.63778	0.505543	-1.29147	-1.57603	3.60677	-1.62534	4.32914	3.48503	2.45107	0.00253478	-1.4824	3.053	-1.61629	5.12123	5.169	2.55161	3.73546	-1.66156	1.97404	-1.50963	-1.60817	-1.14451
hsa-miR-593-3p	1.94078	0.365061	8.25671	1.16007e-14	6.91996e-14	22.1955	UP	0.3215	-1.56057	-1.63331	-1.6019	-0.753	-1.33043	-1.63632	-1.62016	-0.361248	-1.49655	-1.08331	-1.53249	-1.59132	-1.37441	-0.79222	-1.15718	-1.12207	1.17132	-1.63592	-1.45183	-0.5573	-1.67642	-1.29147	-1.57603	2.59759	-1.62534	-1.65392	-1.57398	-1.63472	3.44543	1.77187	-1.45027	-1.61629	-1.41896	-0.7093	-1.66395	-0.884943	1.50246	-1.66329	-1.50963	-1.60817	-1.14451
hsa-miR-595	1.5554	1.77866	5.29727	2.73985e-07	7.73978e-07	5.5368	UP	4.41143	2.52847	-1.63331	-1.6019	-0.753	-1.33043	1.34011	2.5333	-0.361248	-1.49655	-1.08331	-1.53249	-1.59132	3.53658	4.25173	-1.15718	-1.12207	-0.701087	-1.63592	-1.45183	-1.63778	1.64663	4.39171	4.03246	-0.314309	-1.62534	4.35862	3.06573	3.14822	2.67202	-1.4824	2.35081	4.5186	4.29573	3.56606	-0.631196	-0.884943	4.67828	0.615457	-1.50963	1.59521	-1.14451
hsa-miR-596	-1.09357	1.51698	-3.78199	0.000198231	0.000405472	-0.779565	DOWN	-1.64092	0.744213	4.56533	2.72349	4.64509	1.98883	2.13949	4.19923	-0.361248	3.84871	3.38779	-1.53249	-1.59132	4.41143	5.43427	4.78681	3.90356	4.08783	3.0386	-1.45183	4.19177	2.36837	2.93589	3.58824	3.47604	-1.62534	3.96638	3.79176	4.55293	4.32914	3.57026	5.42476	0.926826	3.56173	-0.7093	1.64926	-0.884943	3.56173	0.105422	4.31856	0.860504	-1.14451
hsa-miR-598-5p	-1.76618	2.5283	-6.2202	2.30977e-09	8.43954e-09	10.1909	DOWN	-1.64092	3.16392	0.0447761	4.98635	-0.753	5.62992	4.34023	3.04332	-0.361248	4.26586	4.138	4.17757	4.02437	-1.37441	5.00389	4.39519	4.93223	4.84843	5.2985	3.50839	3.95251	4.54103	4.72972	4.99592	5.49702	3.54611	3.49118	2.90233	3.95049	4.15899	2.53638	3.29069	5.17332	-1.41896	-0.7093	4.138	4.82315	3.5486	3.14218	4.68759	4.86171	5.10337
hsa-miR-601	-1.74449	0.140471	-6.36191	1.05966e-09	3.97956e-09	10.9535	DOWN	-1.64092	1.79793	-1.63331	5.28692	-0.753	3.99094	2.18873	5.49702	-0.361248	4.02047	4.93596	1.89658	0.455752	-1.37441	-0.79222	-1.15718	4.69478	3.76843	3.34105	-1.45183	0.480239	-0.798143	-1.29147	-1.57603	2.3751	3.2471	-1.65392	-1.57398	-1.63472	-0.613578	-1.4824	-1.45027	-1.61629	-1.41896	-0.7093	3.10945	-0.884943	-1.66156	3.44543	2.57502	-1.60817	-1.14451
hsa-miR-602	1.65699	5.13127	8.19404	1.73813e-14	1.01325e-13	21.7961	UP	4.08783	1.87589	3.33033	5.8489	3.82987	5.95868	5.21932	6.09062	-0.361248	4.99404	3.45174	4.32914	4.83611	5.62992	5.73111	3.27163	3.80361	2.97749	4.05801	4.45388	4.92449	4.96071	5.54611	4.17568	4.24421	3.83167	3.66736	4.38408	4.31472	4.82682	5.71924	4.2137	1.99605	-1.41896	-0.7093	3.78421	-0.884943	4.32914	5.27092	1.98156	2.81717	3.02598
hsa-miR-605-3p	-1.25371	-0.581705	-5.30724	2.60959e-07	7.40442e-07	5.58406	DOWN	-1.64092	1.6787	-1.63331	5.46811	-0.753	5.64663	2.2231	-1.62016	-0.361248	-1.49655	3.04843	-1.53249	3.74788	-1.37441	-0.79222	-1.15718	3.09858	2.92444	2.1739	-1.45183	-1.63778	1.46713	3.36727	-1.57603	-1.66137	1.06691	-1.65392	-1.57398	1.08436	0.606589	-1.4824	-1.45027	-1.61629	-1.41896	-0.7093	-1.66395	-0.884943	-1.66156	-1.66329	0.983343	1.05752	4.79822
hsa-miR-6069	1.14145	4.29212	5.62981	5.21474e-08	1.6096e-07	7.14895	UP	4.22114	2.83653	5.5409	0.426196	5.15252	4.5339	5.56246	3.91911	4.74857	5.37447	4.97835	-1.53249	5.39071	3.71506	-0.79222	2.80384	-1.12207	4.20804	2.75019	5.69614	4.40437	4.47159	4.05054	5.22388	4.82126	4.28345	4.25173	4.83047	5.45357	3.8711	5.13694	5.12713	4.70383	2.59759	4.17757	4.79422	5.27977	4.44834	5.51554	5.40243	5.31109	2.90043
hsa-miR-6071	1.70787	0.651769	6.52749	4.20193e-10	1.6355e-09	11.8597	UP	-1.64092	3.76013	-1.63331	1.5485	-0.753	-1.33043	-0.2045	-1.62016	-0.361248	4.92646	-1.08331	-1.53249	-1.59132	-1.37441	-0.79222	-1.15718	-1.12207	-1.67499	1.49731	-1.45183	-1.63778	0.350061	-1.29147	-1.57603	-0.703459	-1.62534	-1.65392	-1.57398	-1.63472	1.29774	-1.4824	-1.45027	1.42511	-1.41896	-0.7093	-0.96245	-0.884943	3.47604	-1.66329	2.31347	-1.60817	-1.14451
hsa-miR-6072	2.18478	0.204373	8.90157	1.65708e-16	1.16449e-15	26.3967	UP	0.181761	-1.56057	-1.63331	-1.6019	-0.753	2.80384	-1.63632	-1.62016	-0.361248	-1.49655	-1.08331	-1.53249	0.360883	-1.37441	-0.79222	-1.15718	-1.12207	-1.67499	-1.63592	-1.45183	-1.63778	-1.45925	-1.29147	-1.57603	-0.345561	-1.62534	-1.65392	-1.57398	-0.526717	-1.64422	-1.4824	2.08149	1.56205	-1.41896	-0.7093	-1.66395	-0.884943	-1.66156	-1.66329	-1.50963	0.187835	-1.14451
hsa-miR-6073	-4.08065	2.97217	-13.9017	2.52517e-32	4.56131e-31	62.5841	DOWN	5.17754	6.06583	5.39783	2.97147	7.22434	5.9208	5.44855	5.71355	5.08603	5.27523	5.20043	-1.53249	5.46575	4.26017	3.43656	4.13629	4.39909	5.00389	5.5649	5.54351	7.75579	6.68167	4.97456	5.5781	5.59523	5.73111	5.65206	7.06565	6.79086	4.97835	4.93422	5.02757	5.80161	4.0343	3.89976	5.96559	4.47817	3.01747	4.90225	3.24504	6.5367	-1.14451
hsa-miR-6077	1.67301	1.20553	6.08526	4.79801e-09	1.69283e-08	9.47611	UP	-1.64092	-1.56057	2.11328	-1.6019	-0.753	-1.33043	-1.63632	0.880452	-0.361248	-1.49655	5.13128	-1.53249	2.91103	-1.37441	-0.79222	-1.15718	-1.12207	-1.67499	3.47604	-1.45183	-1.63778	-1.67642	3.18369	-1.57603	0.786813	-0.269157	1.98633	-1.57398	0.731387	3.13987	-1.4824	-1.45027	-0.0530304	2.9451	-0.7093	4.1848	3.51274	3.78421	1.43546	-1.50963	2.33698	-1.14451
hsa-miR-611	-1.14375	0.182977	-4.30367	2.4831e-05	5.64142e-05	1.19404	DOWN	2.6536	1.20457	0.28163	0.867178	4.57035	-1.33043	-1.63632	-1.62016	4.47494	4.20982	-1.08331	-1.53249	4.85607	5.10149	-0.79222	4.69478	3.66736	2.08485	0.972622	-1.45183	-1.63778	-1.59809	-1.29147	-1.57603	2.08485	3.3221	-0.575396	-1.57398	4.19573	-0.3013	4.05801	2.35773	-1.61629	3.78628	-0.7093	-1.66395	-0.884943	-0.0826413	-1.66329	3.09649	-1.60817	-1.14451
hsa-miR-612	1.83286	3.11814	7.56211	9.33102e-13	4.66551e-12	17.8662	UP	2.04253	2.81042	5.28692	3.28687	-0.753	-1.33043	1.5485	2.46441	-0.361248	4.48196	-1.08331	3.1445	2.32777	3.70739	-0.79222	3.90534	5.20672	3.75815	3.60464	-1.45183	3.2734	3.67174	3.55759	3.22325	5.48305	2.72115	4.91886	4.37763	2.09829	4.72599	2.5088	3.58418	4.15899	4.11309	-0.7093	4.48744	-0.884943	2.68455	3.92272	3.17748	-1.60817	-1.14451
hsa-miR-6124	1.26139	6.89116	11.8775	1.05151e-25	1.36218e-24	47.4154	UP	6.52306	5.60834	7.32282	6.47391	6.58783	5.94898	6.51006	5.65485	6.21475	6.44317	5.99907	6.02673	5.79527	6.64345	-0.79222	5.83287	5.08975	6.06973	6.05458	6.54426	6.08705	6.62489	6.08027	5.8517	6.54858	6.25727	6.84282	5.68502	6.73982	6.04335	5.9265	6.05458	6.35197	6.8179	5.99907	6.40475	7.22434	7.03251	7.37156	6.08348	6.48333	8.2142
hsa-miR-6127	3.01864	3.73108	11.8627	1.17403e-25	1.5057e-24	47.3058	UP	3.02197	-1.56057	-0.378457	-1.6019	3.89621	-1.33043	4.05801	1.5485	-0.361248	3.31154	-1.08331	3.56816	-1.59132	-1.37441	-0.79222	-1.15718	-1.12207	-0.0322261	-0.2045	4.86777	4.61198	4.84635	4.56186	4.89123	4.52056	4.15899	4.12405	3.20002	1.48542	4.98635	4.39909	4.78083	4.0265	-1.41896	-0.7093	4.80007	5.05699	5.23433	4.85201	3.87816	3.48503	-1.14451
hsa-miR-6129	1.54094	-0.136614	6.81665	8.05533e-11	3.38166e-10	13.4803	UP	-1.64092	-1.56057	1.92998	0.548735	-0.753	-1.33043	-0.334165	-1.62016	-0.361248	-1.49655	-1.08331	-1.53249	-1.59132	-1.37441	-0.79222	-1.15718	-1.12207	-0.158965	-0.299035	-1.45183	-0.279474	-1.67642	-1.29147	-1.57603	-1.66137	-1.62534	-1.65392	-1.57398	-1.63472	-1.64422	-1.4824	2.90043	2.0171	-1.41896	-0.7093	-1.10382	-0.884943	-1.66156	-1.66329	-1.50963	-1.60817	-1.14451
hsa-miR-6131	-5.25047	9.9226	-31.2336	7.75182e-85	4.97086e-82	183.007	DOWN	11.5336	12.7041	13.0632	13.2276	13.8846	12.0842	12.8165	12.5838	12.6493	12.8165	12.5117	12.789	13.0632	12.2507	11.3187	13.0632	13.1669	12.8165	13.5856	13.2276	13.8846	13.0632	11.7445	12.7615	12.4434	13.3915	12.3088	13.7162	12.5838	11.7445	11.3691	12.4434	12.9159	12.1909	13.1079	12.8165	12.3088	10.4227	10.9742	11.5826	12.5838	11.5826
hsa-miR-6133	3.14174	0.989203	11.6437	5.94067e-25	7.22172e-24	45.6936	UP	-1.64092	-1.56057	-1.63331	-1.6019	-0.753	-1.33043	-1.63632	1.49731	-0.361248	-1.49655	-1.08331	-1.53249	-1.59132	-1.37441	-0.79222	-1.15718	-1.12207	1.11479	-1.63592	-1.45183	-1.63778	0.536643	-1.29147	1.92998	-1.66137	-1.62534	1.18146	-1.57398	4.43136	-1.64422	-1.4824	3.56606	1.70551	-1.41896	-0.7093	2.07064	-0.884943	3.08106	-1.66329	3.04588	-1.60817	-1.14451
hsa-miR-6134	1.05386	0.0361609	4.28086	2.73083e-05	6.15516e-05	1.1032	UP	1.80887	-1.56057	-1.63331	4.20804	-0.753	-1.33043	1.56523	-1.62016	-0.361248	-1.49655	-1.08331	-1.53249	-1.59132	-1.37441	-0.79222	-1.15718	-1.12207	-1.67499	1.09418	-1.45183	1.23723	2.07611	-1.29147	-1.57603	-1.66137	-1.62534	-1.65392	-1.57398	-1.63472	-0.135574	-1.4824	1.87381	-1.61629	-1.41896	-0.7093	-0.801978	-0.884943	4.76047	-0.75517	1.88982	-1.60817	-1.14451
hsa-miR-614	-2.17822	9.0671	-16.2659	3.78461e-40	1.0112e-38	80.533	DOWN	9.62635	11.8006	10.8938	11.2138	10.0911	9.56733	9.62635	10.4543	10.6642	9.71488	9.88292	10.8541	10.7731	10.2631	10.2631	11.2642	11.9767	11.3187	11.8722	10.7312	10.0911	10.5257	10.4543	11.1643	10.4908	11.0203	11.0708	11.3187	11.0203	11.1179	10.7731	11.9767	11.8006	9.11859	9.6535	10.3025	10.2631	9.28104	9.18815	10.4543	9.11859	9.56733
hsa-miR-615-3p	2.81449	2.52442	11.768	2.36861e-25	2.97817e-24	46.6079	UP	3.37149	2.7302	2.9405	-1.6019	-0.753	3.34105	-1.63632	2.6206	-0.361248	-1.49655	-1.08331	-1.53249	0.640874	2.40219	-0.79222	-1.15718	-1.12207	0.521113	-1.63592	2.91367	0.831639	2.20206	4.38813	3.4713	3.81357	0.892922	-1.65392	3.04588	4.48908	3.03438	3.54362	-1.45027	5.05512	-1.41896	-0.7093	4.23676	-0.884943	1.51353	4.33671	1.924	0.101917	-1.14451
hsa-miR-617	-1.53712	-0.338242	-6.81209	8.27085e-11	3.46646e-10	13.4544	DOWN	-1.64092	-1.56057	0.880452	5.78948	-0.753	-1.33043	3.22325	1.34287	-0.361248	2.07064	3.2772	3.00556	-1.59132	2.80826	4.07671	-1.15718	-1.12207	-1.40671	-1.63592	-1.45183	3.83797	-0.967065	-1.29147	-1.57603	-1.66137	4.22473	-1.65392	-1.57398	-1.63472	3.94665	-1.4824	-1.45027	2.44836	-1.41896	-0.7093	0.870207	-0.884943	-1.66156	-0.806239	-1.50963	-1.60817	-1.14451
hsa-miR-619-3p	-1.00451	-0.655653	-4.8194	2.61089e-06	6.65037e-06	3.35643	DOWN	-1.64092	2.01421	-1.63331	1.66324	-0.753	-1.33043	-1.63632	3.84144	-0.361248	-1.49655	-1.08331	-1.53249	0.91977	-1.37441	-0.79222	-1.15718	-1.12207	-1.67499	-1.63592	-1.45183	0.771743	-1.67642	-1.29147	-1.57603	-1.66137	-1.62534	-1.65392	-1.57398	1.91512	-1.64422	-1.4824	-1.45027	-1.61629	-1.41896	-0.7093	-1.66395	-0.884943	-1.66156	-1.66329	3.21939	-1.60817	-1.14451
hsa-miR-627-3p	-1.24231	-0.493018	-5.4135	1.54685e-07	4.51384e-07	6.09171	DOWN	-1.64092	-1.56057	-0.24633	2.32311	-0.753	-1.33043	2.04744	3.032	-0.361248	4.11671	4.57409	4.88679	-1.59132	2.61326	-0.79222	-1.15718	3.74582	-1.67499	2.2775	-1.45183	0.635552	-1.49557	-1.29147	-1.57603	-1.66137	-1.62534	-1.65392	-1.57398	-1.63472	1.50246	1.8247	3.23165	4.27126	-1.41896	-0.7093	1.66604	-0.884943	-1.66156	-0.317965	-1.50963	-1.60817	-1.14451
hsa-miR-628-5p	-1.13656	-0.399589	-4.68268	4.83321e-06	1.19895e-05	2.76338	DOWN	-1.64092	-1.56057	-1.63331	2.74305	-0.753	3.23573	2.97147	-1.62016	-0.361248	2.42541	-1.08331	0.757757	0.66013	-1.37441	-0.79222	-1.15718	-1.12207	-1.67499	2.1739	-1.45183	-1.63778	-1.51864	-1.29147	-1.57603	-1.66137	-1.62534	4.38992	-1.57398	-1.63472	-1.64422	-1.4824	-1.45027	-1.61629	-1.41896	-0.7093	-0.485496	-0.884943	-1.66156	-1.66329	2.77628	-1.60817	3.07847
hsa-miR-629-3p	2.54706	2.03242	9.87513	2.07322e-19	1.73785e-18	33.0189	UP	4.04137	0.863841	-1.63331	4.36828	-0.753	-1.33043	2.13374	2.16496	-0.361248	-1.49655	-1.08331	5.27523	-1.59132	-1.37441	-0.79222	-1.15718	-1.12207	-1.67499	-0.35723	-1.45183	0.244528	3.2277	-1.29147	1.97404	2.21867	3.1445	-1.65392	-1.57398	0.985915	2.13374	2.3185	2.12962	-1.61629	-1.41896	-0.7093	-0.863648	-0.884943	0.00253478	0.329702	-1.50963	2.97973	-1.14451
hsa-miR-629-5p	-1.23822	1.23151	-3.78063	0.000199255	0.000406595	-0.78443	DOWN	-1.64092	4.94738	2.17882	3.73966	-0.753	2.34647	0.47727	3.4623	4.34023	-1.49655	-1.08331	4.27126	4.49081	-1.37441	-0.79222	-1.15718	3.4623	-0.995235	0.831639	2.69633	3.85207	0.198104	-1.29147	-1.57603	-1.66137	1.70551	2.38649	2.28895	-1.63472	2.97147	2.52346	-1.45027	-1.61629	-1.41896	-0.7093	-0.334165	-0.884943	-0.251722	-1.66329	4.5869	1.86953	5.17754
hsa-miR-632	1.62833	1.63682	5.97867	8.48207e-09	2.92426e-08	8.91957	UP	-1.64092	3.77612	-1.63331	5.23433	-0.753	2.04253	1.01268	-1.62016	-0.361248	-1.49655	-1.08331	4.52252	-1.59132	-1.37441	-0.79222	-1.15718	-1.12207	0.530152	1.08152	3.61329	-1.63778	2.84466	-1.29147	1.34849	1.10068	-1.62534	-1.65392	-1.57398	1.19742	-1.64422	-1.4824	-1.45027	1.90073	1.90511	5.13343	1.31948	-0.884943	1.99136	-1.66329	-1.50963	-1.60817	3.0751
hsa-miR-634	1.63431	3.02216	6.57641	3.18771e-10	1.26375e-09	12.1305	UP	3.31762	3.3799	3.80361	3.63465	3.57026	3.74377	3.42626	2.09829	-0.361248	-1.49655	-1.08331	-1.53249	-1.59132	2.9405	-0.79222	4.43136	-1.12207	-0.798143	1.75484	-1.45183	3.14822	4.64509	4.5299	4.00964	1.49436	1.16773	2.81257	4.5019	0.947926	3.41062	3.91525	-1.45027	3.02598	2.59223	-0.7093	4.51115	4.65639	0.892922	4.54708	4.6985	3.95251	-1.14451
hsa-miR-637	1.07879	4.58507	6.23167	2.16949e-09	7.93831e-09	10.2522	UP	0.65533	2.95071	2.9451	5.21711	5.03943	3.15323	5.27092	4.68378	4.4028	4.99997	-1.08331	4.72972	4.58149	5.34985	5.12513	5.2149	6.30348	5.26233	4.23262	2.99194	3.30675	4.7908	4.74443	4.60472	3.92272	1.44863	5.32442	4.55091	5.20672	4.74262	4.8173	4.47817	3.99804	4.80581	-0.7093	4.65245	4.72599	5.33351	5.61405	1.91732	5.34027	3.9321
hsa-miR-642a-5p	2.99386	2.51443	11.9228	7.51387e-26	9.88363e-25	47.7496	UP	-1.64092	-1.56057	3.89261	1.22297	4.23262	-1.33043	1.20081	2.54684	-0.361248	-1.49655	-1.08331	-1.53249	5.27977	2.37976	-0.79222	-1.15718	-1.12207	0.65533	-1.63592	3.00556	3.8711	1.31621	2.49747	2.45378	-1.66137	0.0766217	1.73186	1.68285	2.57502	1.91732	-1.4824	-1.45027	-1.61629	2.57274	3.76013	2.79935	4.05463	-1.66156	3.8601	-1.50963	0.0593174	-1.14451
hsa-miR-642b-5p	2.92984	1.60871	10.9501	9.57891e-23	1.0195e-21	40.6422	UP	1.65189	-1.56057	-0.146817	5.36057	-0.753	-1.33043	0.341078	1.87381	-0.361248	-1.49655	-1.08331	1.61168	2.45378	-1.37441	-0.79222	-1.15718	-1.12207	-0.582548	-1.63592	-1.45183	-1.63778	-1.06193	3.30418	4.60103	3.82987	-1.62534	-0.597648	-1.57398	4.90225	2.82617	-1.4824	4.1149	-1.61629	2.88446	-0.7093	4.46838	-0.884943	0.169196	3.51274	3.80361	3.93754	-1.14451
hsa-miR-645	1.03104	0.771596	3.4203	0.000739621	0.00138882	-2.01552	UP	-1.64092	4.89312	-1.63331	-1.6019	-0.753	-1.33043	-1.63632	-1.62016	-0.361248	5.47857	-1.08331	2.5088	1.69717	2.29345	4.97456	4.11309	-1.12207	4.32034	-1.63592	3.07033	-1.63778	-1.67642	-1.29147	-1.57603	1.40669	-1.62534	-1.65392	1.16773	-1.63472	-0.629252	2.96003	4.28898	4.08442	-1.41896	-0.7093	4.8286	-0.884943	-1.66156	-0.531161	3.78204	0.682498	-1.14451
hsa-miR-647	-1.79981	1.07652	-6.08677	4.75899e-09	1.6837e-08	9.48409	DOWN	1.01268	-1.56057	-1.63331	3.45174	-0.753	-1.33043	1.4449	4.00182	4.17023	2.00561	-1.08331	5.81185	5.80852	-1.37441	-0.79222	2.59759	3.4561	3.55966	-1.63592	2.0788	-1.63778	1.3279	-1.29147	3.2471	1.6787	1.92176	2.01421	-1.57398	3.68568	2.43152	-1.4824	1.83473	-1.61629	-1.41896	-0.7093	0.18577	3.8711	0.937652	0.162174	-1.50963	-1.60817	3.50839
hsa-miR-648	-1.22476	0.949751	-4.33076	2.21667e-05	5.08111e-05	1.30252	DOWN	-0.679843	3.20186	3.63148	6.3319	-0.753	-1.33043	3.88913	2.00799	-0.361248	-1.49655	3.42626	2.82397	4.29223	-1.37441	-0.79222	-1.15718	4.19748	-0.248661	-1.63592	3.1706	3.32441	4.63442	3.23967	3.19108	4.46508	3.37327	4.14363	2.2835	-0.305335	4.25173	3.91125	3.8601	4.84427	-1.41896	-0.7093	2.70088	-0.884943	0.870207	3.16151	-1.50963	-1.60817	-1.14451
hsa-miR-6499-3p	1.48232	0.565242	5.55943	7.45249e-08	2.2542e-07	6.80151	UP	1.69478	-1.56057	1.94437	0.205341	-0.753	-1.33043	0.892922	1.52385	-0.361248	-1.49655	-1.08331	1.574	-1.59132	-1.37441	-0.79222	-1.15718	-1.12207	-1.26369	-1.63592	-1.45183	-1.63778	-1.19033	-1.29147	3.4933	-1.66137	-1.62534	-1.65392	-1.57398	-1.63472	-1.64422	2.9484	4.95312	-1.61629	2.75019	-0.7093	-0.788572	-0.884943	0.0143087	-1.66329	-1.50963	1.20081	-1.14451
hsa-miR-650	-2.09831	4.11677	-10.9481	9.71819e-23	1.03005e-21	40.6279	DOWN	4.20255	5.97244	5.38365	5.99586	6.00583	4.66352	5.43913	5.54611	5.80161	5.9208	3.21126	5.35209	5.40689	4.86379	4.69666	4.80581	4.77896	5.82705	5.44855	5.65764	5.16716	5.07238	5.62992	5.80852	5.48829	5.32916	6.12597	5.77878	5.53037	6.15854	5.87065	5.64663	6.20004	4.91886	-0.7093	5.39783	5.34761	5.61951	5.22825	6.26546	6.00583	-1.14451
hsa-miR-6501-3p	-3.36005	3.24314	-15.111	2.51298e-36	5.41664e-35	71.7632	DOWN	4.36253	5.03745	6.56963	3.82233	5.5781	5.35209	5.42027	5.62992	4.38088	5.53518	5.51322	6.01915	4.44298	6.24579	3.84144	6.62948	-1.12207	5.79527	5.31109	5.01395	5.37939	5.35443	5.40689	5.38365	5.37939	5.42476	5.7668	5.81185	5.3701	5.13694	5.17332	6.04693	6.42195	4.74443	5.21062	5.14678	5.17332	5.0818	4.96071	5.08975	2.85084	-1.14451
hsa-miR-6501-5p	3.01803	2.5219	9.69695	7.19848e-19	5.71644e-18	31.7846	UP	-1.64092	3.54362	5.32916	-1.6019	4.17757	-1.33043	-1.63632	5.07238	-0.361248	-1.49655	-1.08331	-1.53249	1.00076	-1.37441	-0.79222	3.56173	-1.12207	2.30895	1.69478	-1.45183	4.81147	0.350061	-1.29147	3.86417	3.68195	2.61326	2.51349	3.24504	1.34287	4.96071	5.64663	3.7282	3.71302	-1.41896	-0.7093	3.51672	3.17544	2.81257	2.33266	1.72357	4.17757	-1.14451
hsa-miR-6504-3p	1.10073	-0.0492151	4.65178	5.54466e-06	1.36096e-05	2.63131	UP	1.10068	-1.56057	-1.63331	-1.6019	-0.753	-1.33043	0.853713	4.5	-0.361248	-1.49655	-1.08331	3.20369	-1.59132	-1.37441	-0.79222	-1.15718	-1.12207	-1.67499	-1.63592	-1.45183	-1.63778	2.50049	-1.29147	2.62847	-1.66137	-1.62534	-1.65392	-1.57398	-1.63472	-1.64422	-1.4824	-1.45027	-1.61629	-1.41896	-0.7093	-1.66395	-0.884943	-1.66156	-1.66329	-1.50963	-1.60817	-1.14451
hsa-miR-6507-5p	-1.69227	1.25806	-6.12611	3.84968e-09	1.3845e-08	9.69133	DOWN	2.16496	-1.56057	5.41807	-1.6019	-0.753	-1.33043	3.43656	0.0855217	-0.361248	3.99094	-1.08331	5.58509	-1.59132	4.33301	4.20627	3.20186	-1.12207	3.29647	1.17818	1.92699	2.15508	3.50839	5.52551	2.64347	2.81947	3.85604	4.66726	3.66287	-1.63472	3.08775	-1.4824	4.44466	4.83422	4.26017	-0.7093	1.95872	3.64725	-0.0025	3.40838	4.11101	3.36525	4.89502
hsa-miR-6508-5p	2.18487	2.52005	8.81459	2.96572e-16	2.02316e-15	25.8207	UP	4.82505	-1.56057	4.39519	1.50246	4.39519	-1.33043	-1.63632	1.8549	5.82125	1.70991	-1.08331	4.0921	4.15899	-1.37441	-0.79222	4.14363	-1.12207	0.731387	-0.0587957	-1.45183	2.91103	2.12962	-1.29147	4.25173	-0.0272174	-1.62534	1.70771	3.11128	-1.63472	2.88996	2.72349	-1.45027	4.64146	-1.41896	5.35209	3.21939	-0.884943	4.24616	3.20917	2.74067	4.26211	3.88913
hsa-miR-6509-3p	2.86018	0.863582	11.5461	1.22021e-24	1.44901e-23	44.9781	UP	-1.64092	-1.56057	0.591513	-1.6019	-0.753	-1.33043	-1.63632	-1.62016	-0.361248	-1.49655	-1.08331	3.96828	-1.59132	-1.37441	-0.79222	3.65176	-1.12207	-1.67499	-1.63592	-1.45183	1.15355	-0.939413	2.25567	-1.57603	-1.66137	-1.62534	1.42511	-1.57398	3.63781	-1.64422	2.92713	-1.45027	1.88488	-1.41896	-0.7093	-0.343191	-0.884943	1.12166	-1.66329	-1.50963	-1.60817	-1.14451
hsa-miR-651-5p	-1.42976	-0.234019	-5.75626	2.72365e-08	8.7327e-08	7.78156	DOWN	-1.64092	1.91512	1.6711	4.2137	-0.753	-1.33043	-1.63632	2.37743	-0.361248	-1.49655	-1.08331	1.29488	4.58883	-1.37441	-0.79222	-1.15718	4.27296	-1.67499	-1.63592	-1.45183	-1.63778	-1.67642	3.99094	2.18873	0.736457	1.1749	3.93389	-1.57398	3.57552	-1.64422	-1.4824	1.68748	-1.61629	5.8461	5.78394	-1.66395	4.39345	3.4713	2.18873	-1.50963	-1.60817	-1.14451
hsa-miR-6510-3p	1.03674	0.00127887	4.31445	2.37353e-05	5.41165e-05	1.23717	UP	0.396874	4.1274	-0.39533	-1.6019	-0.753	-1.33043	-1.63632	-1.62016	-0.361248	-1.49655	-1.08331	-1.53249	1.08152	-1.37441	-0.79222	-1.15718	-1.12207	-1.24946	-1.63592	-1.45183	-0.294657	-1.02262	-1.29147	-1.57603	-1.66137	1.92176	-1.65392	1.78763	0.422937	-0.635517	2.27166	-1.45027	2.86872	-1.41896	-0.7093	-1.66395	-0.884943	-1.66156	-1.66329	-1.50963	-1.60817	-1.14451
hsa-miR-6510-5p	1.68958	6.07812	13.0174	2.05633e-29	3.23588e-28	55.9114	UP	5.28468	4.62855	6.62489	5.55739	5.20867	5.35677	4.26586	5.38365	4.3701	6.26966	4.24811	4.84635	6.06192	4.46508	5.25809	5.36518	-1.12207	6.26966	5.45856	5.97244	5.39542	4.73541	5.24986	5.26021	5.77261	5.46098	5.8461	6.06973	6.22219	5.04499	5.32442	3.70918	4.19923	2.19389	3.61329	5.4434	5.26427	6.33574	5.13128	4.61809	6.46485	3.90356
hsa-miR-6511a-3p	2.64297	3.64217	10.9604	8.88628e-23	9.49722e-22	40.7168	UP	3.74377	2.74067	4.45035	-1.6019	3.47604	4.47817	4.34557	2.78484	-0.361248	2.9405	-1.08331	-1.53249	4.5339	4.39519	-0.79222	2.85084	-1.12207	4.67281	1.28214	3.08366	4.04306	4.77896	2.55161	4.76047	4.61198	0.00791739	4.51115	3.90534	5.08975	4.27997	5.55739	-1.45027	4.57768	-1.41896	-0.7093	3.4337	-0.884943	3.73546	2.9063	3.45834	4.91455	-1.14451
hsa-miR-6511b-3p	1.93836	4.5142	10.097	4.3488e-20	3.83322e-19	34.5682	UP	4.69289	5.62735	1.25987	-1.6019	-0.753	4.67468	4.68003	4.94937	-0.361248	3.8263	4.28183	3.65928	5.75423	3.44334	4.52803	4.89312	-1.12207	2.37743	4.75844	3.29647	4.63442	4.62289	4.8286	4.9728	5.28468	5.04312	4.48744	4.71292	5.63523	5.71355	5.47857	4.435	4.72599	-1.41896	-0.7093	5.12513	-0.884943	4.80954	4.68003	2.82397	4.57222	-1.14451
hsa-miR-6511b-5p	-1.29343	5.81695	-11.1564	2.13055e-23	2.31562e-22	42.1357	DOWN	5.22388	6.21475	6.70994	4.22114	6.0121	6.45623	6.02673	6.48333	6.77033	6.05825	6.31589	6.1407	6.77033	6.1407	6.27788	6.98822	5.85785	7.22434	6.8879	6.3319	6.67121	6.21475	5.94583	6.75993	6.31169	7.17558	6.83266	6.69116	6.35197	6.74996	6.36099	7.28422	7.15072	5.18774	5.54611	6.96498	6.46485	6.57914	6.06192	6.4877	5.72238	5.62477
hsa-miR-6512-3p	1.10699	0.934285	3.82071	0.000171125	0.000353695	-0.640717	UP	-1.64092	1.15355	-1.63331	2.50615	-0.753	2.59759	-1.63632	1.68517	-0.361248	-1.49655	-1.08331	2.75824	-1.59132	-1.37441	-0.79222	-1.15718	5.11713	1.80062	10.2185	-1.45183	2.42082	-1.03124	-1.29147	-1.57603	3.14218	-1.62534	-0.725222	-1.57398	-1.63472	-0.753	3.12864	3.64725	3.28687	-1.41896	-0.7093	2.61326	-0.884943	-1.66156	-0.349811	-1.50963	-1.60817	-1.14451
hsa-miR-6514-3p	1.65167	1.75949	5.73977	2.96607e-08	9.45089e-08	7.69847	UP	5.21276	-1.56057	0.302309	2.06839	-0.753	-1.33043	2.89189	-1.62016	-0.361248	-1.49655	2.84856	1.70551	-1.59132	-1.37441	-0.79222	-1.15718	4.48196	3.95618	4.34713	-1.45183	2.5333	1.64125	3.37149	-1.57603	1.86447	1.28517	1.07646	0.548735	4.27467	-0.34793	-1.4824	-1.45027	-1.61629	3.00988	5.0076	0.626552	-0.884943	-1.66156	0.28163	1.41516	-1.60817	3.74788
hsa-miR-6515-5p	-1.17833	5.45324	-10.4549	3.40696e-21	3.17777e-20	37.0956	DOWN	5.65485	4.20255	7.04373	5.2542	5.82125	5.76033	5.74203	5.39783	6.25329	5.67957	6.81292	5.70775	5.91445	6.38641	5.23887	6.42195	6.9407	6.32009	7.1997	6.69116	5.13518	5.79527	6.60678	6.5013	6.00897	6.27788	6.23772	6.52722	6.56963	6.91907	6.19228	7.17558	6.62489	6.61624	5.18987	6.98822	7.18754	6.35197	6.01915	6.05825	5.7697	5.93222
hsa-miR-652-3p	-1.38237	0.0844856	-5.11519	6.58808e-07	1.78253e-06	4.68667	DOWN	-1.64092	1.9939	4.75642	3.79383	3.97192	-1.33043	1.34849	2.92444	-0.361248	3.38779	3.93754	-1.53249	4.17757	-1.37441	-0.79222	5.61119	5.37447	2.0171	-1.63592	1.78763	2.83197	4.91886	-1.29147	-1.57603	3.73546	0.179817	4.22473	1.68748	-1.63472	-1.64422	-1.4824	-1.45027	1.57943	5.06847	3.73966	3.69958	-0.884943	3.06136	4.18812	-1.50963	-1.60817	3.57026
hsa-miR-654-5p	-2.42406	4.12433	-13.4534	7.59629e-31	1.28187e-29	59.1948	DOWN	5.91445	6.63876	5.50161	3.1957	6.25329	5.393	5.64663	5.90175	5.07637	5.80161	4.03968	5.64663	6.17688	3.02197	5.64663	5.68502	-1.12207	6.03977	6.32009	5.67957	5.65206	5.23887	5.13518	5.91445	5.56735	5.59787	5.83636	5.50161	5.0818	5.61119	5.4634	5.85785	5.20672	-1.41896	4.53943	5.3378	4.17379	5.07238	5.59787	4.95312	5.79527	3.81695
hsa-miR-655-3p	-1.08831	0.383832	-3.57483	0.000426749	0.00082988	-1.50105	DOWN	-1.64092	4.02863	-0.424357	1.34287	4.49633	2.69107	-0.37567	-1.62016	-0.361248	3.94113	-1.08331	3.64951	4.8286	3.10945	-0.79222	4.12405	-1.12207	3.99094	-1.63592	-1.45183	1.84564	-1.67642	-1.29147	3.32441	-1.66137	2.18873	-0.16673	4.81341	4.26405	-1.64422	-1.4824	-1.45027	2.55384	4.1203	3.83797	5.393	-0.884943	0.0476652	-1.66329	-1.50963	3.8263	-1.14451
hsa-miR-657	1.41316	1.74965	5.13769	5.91829e-07	1.60469e-06	4.79045	UP	-1.64092	-1.56057	-1.63331	0.244528	-0.753	-1.33043	1.06385	3.77244	-0.361248	3.99804	-1.08331	-1.53249	3.56173	3.67174	-0.79222	-1.15718	3.8601	-0.75083	-1.63592	1.86953	-0.575396	3.42626	3.1307	2.74305	2.98749	2.36837	2.11328	-1.57398	1.09743	-1.64422	3.60072	-1.45027	4.0488	-1.41896	-0.7093	1.71448	-0.884943	1.87381	3.48282	-1.50963	3.26986	-1.14451
hsa-miR-659-3p	1.93095	2.58844	7.40328	2.4684e-12	1.18345e-11	16.9078	UP	0.0965826	1.86953	-1.63331	2.33482	3.4032	2.08149	3.71929	3.62793	-0.361248	4.13629	-1.08331	-1.53249	4.91886	-1.37441	-0.79222	-1.15718	-1.12207	4.15517	2.11328	3.13509	-1.63778	2.53638	2.96661	4.15517	3.86934	3.95049	2.06294	-1.57398	1.77976	4.02047	2.63375	2.59491	3.99436	4.42444	-0.7093	3.88579	-0.884943	4.24616	0.722352	3.02397	4.43705	-1.14451
hsa-miR-661	1.91867	1.58239	7.31609	4.18887e-12	1.9571e-11	16.3871	UP	1.02527	-1.56057	-0.436817	3.37748	-0.753	-1.33043	0.332413	-1.62016	-0.361248	-1.49655	-1.08331	1.96956	1.94678	3.3799	-0.79222	-1.15718	2.87528	-0.0980609	0.518087	-1.45183	-1.63778	0.815107	2.60332	-1.57603	4.344	-1.62534	-0.725222	-1.57398	2.79216	-1.64422	3.96013	-1.45027	4.94538	3.67564	-0.7093	1.36851	-0.884943	0.088287	-1.16948	2.54684	3.32812	-1.14451
hsa-miR-663a	-1.55603	11.4541	-27.1549	8.36452e-74	2.1455e-71	157.745	DOWN	12.037	11.5826	12.375	12.8683	12.3088	11.7445	11.9767	12.037	12.375	13.014	11.9767	12.1909	12.375	12.0842	11.5336	12.7615	11.8722	12.0842	12.3088	12.375	12.1357	11.4732	11.9209	12.3088	12.2507	12.2507	12.2507	12.375	12.0842	11.3691	11.8722	11.3691	12.1357	11.5336	12.375	12.3088	11.8722	12.3088	11.2642	12.037	12.1909	11.8722
hsa-miR-664a-3p	1.38791	1.27928	5.02225	1.02212e-06	2.71402e-06	4.26181	UP	0.40857	-1.56057	2.52596	5.56246	-0.753	-1.33043	3.85604	-1.62016	-0.361248	-1.49655	-1.08331	-1.53249	1.16773	-1.37441	-0.79222	-1.15718	4.5339	-1.67499	0.648109	-1.45183	0.372383	-1.58174	2.85084	2.65092	1.3879	2.66507	-0.713961	-1.57398	-1.63472	-1.64422	-1.4824	3.20369	3.39876	-1.41896	-0.7093	-1.66395	-0.884943	5.02757	2.63887	-1.50963	0.0366913	-1.14451
hsa-miR-664a-5p	-1.14595	-0.558397	-4.88302	1.95163e-06	5.01596e-06	3.63712	DOWN	-1.64092	4.1203	-1.63331	4.27126	-0.753	4.38088	2.9405	0.162174	-0.361248	1.8873	3.26986	-1.53249	-1.59132	-1.37441	-0.79222	3.2945	-1.12207	1.86953	2.92713	-1.45183	3.69559	-0.731009	-1.29147	-1.57603	-1.66137	5.05887	-1.65392	-1.57398	2.03756	-1.64422	-1.4824	2.16924	-1.61629	-1.41896	-0.7093	-1.66395	-0.884943	-0.213861	-1.66329	2.17636	-1.60817	5.77261
hsa-miR-664b-3p	1.53408	2.91236	5.84133	1.74955e-08	5.76071e-08	8.21307	UP	3.96448	-1.56057	3.82233	2.56745	-0.753	3.11725	4.08442	3.67564	4.71115	4.9728	-1.08331	4.9902	-1.59132	4.3112	3.48503	3.57552	4.5339	2.56199	-1.63592	2.95302	4.17379	4.74443	4.28898	1.68748	3.28491	3.21483	4.00182	3.78421	4.18132	3.44962	3.67369	4.22114	4.39345	2.87528	-0.7093	2.63887	-0.884943	4.39519	2.64585	-1.50963	2.77184	5.55474
hsa-miR-668-3p	1.83508	3.31028	7.291	4.87408e-12	2.26486e-11	16.238	UP	4.25805	5.57283	1.03253	-1.6019	3.44962	4.92252	5.54611	2.78981	4.36253	-1.49655	-1.08331	-1.53249	3.1307	2.3891	3.85207	-1.15718	-1.12207	4.39519	-1.63592	-1.45183	3.98505	4.16242	4.59888	1.90973	3.65928	1.27279	3.83167	4.43136	5.17754	3.57981	4.47159	3.75415	2.84466	-1.41896	-0.7093	3.45174	3.26592	0.685339	5.05512	-1.50963	5.80161	-1.14451
hsa-miR-668-5p	-2.30755	4.65922	-19.7635	1.53352e-51	8.36912e-50	106.68	DOWN	6.80126	6.03977	6.89867	4.62141	5.19835	5.90175	5.29344	5.37939	5.34985	5.54611	5.83986	6.54426	5.88274	5.93222	5.61405	6.69116	7.04373	6.63407	6.5529	5.42924	5.8517	5.95868	5.7164	6.04335	5.56246	5.87065	6.21475	5.98584	5.89215	5.99264	5.99264	5.6742	5.52551	5.58256	4.94153	5.48829	5.75424	5.78948	5.01578	5.59259	5.43914	5.8517
hsa-miR-670-5p	1.72752	0.210206	6.49188	5.1334e-10	1.96525e-09	11.6635	UP	-1.64092	5.07454	-1.63331	-1.6019	-0.753	-1.33044	-1.63632	1.11133	-0.361248	-1.49655	-1.08331	-1.53249	-1.59132	-1.37441	-0.79222	-1.15718	-1.12207	-1.67499	-1.63592	-1.45183	-1.63778	-1.67642	-1.29147	1.12867	-1.66136	-1.62534	2.95302	1.54581	1.61827	0.648109	2.59491	-1.45027	-1.61629	-1.41896	-0.7093	4.60848	-0.884943	-1.66156	-1.66329	-1.50963	3.03438	-1.14451
hsa-miR-671-3p	1.93511	1.86546	7.2932	4.80998e-12	2.23913e-11	16.251	UP	-1.64092	3.42626	-0.480152	-1.6019	-0.753	-1.33044	3.2753	-0.042313	4.094	1.55886	-1.08331	-1.53249	-1.59132	-1.37441	-0.79222	-1.15718	-1.12207	-1.67499	0.511374	-1.45183	0.127491	4.10432	3.94665	0.932174	2.08485	-1.62534	-0.290465	-1.57398	5.15475	0.324246	-1.4824	3.97192	-1.61629	3.4989	-0.7093	1.73913e-05	-0.884943	1.24412	0.23375	2.07064	4.03246	-1.14451
hsa-miR-6715b-5p	-1.19774	1.28313	-3.97493	9.41907e-05	0.000200998	-0.0754533	DOWN	4.63795	-1.56057	-1.63331	-1.6019	-0.753	-1.33044	0.0834609	1.57943	-0.361248	-1.49655	-1.08331	-1.53249	4.78083	2.35547	4.55293	-1.15718	-1.12207	4.73541	2.67202	2.2231	2.54939	3.44125	5.29344	4.31296	2.22563	4.72972	3.73546	2.82176	4.39909	3.45834	-1.4824	4.49634	-1.61629	1.95872	-0.7093	2.6937	4.64146	-1.66156	2.65603	3.99094	5.22825	-1.14451
hsa-miR-6716-3p	2.77266	1.60444	10.6436	8.79328e-22	8.60869e-21	38.4403	UP	-0.419444	1.10068	-1.63331	-1.6019	-0.753	3.73171	0.825113	1.59224	-0.361248	-1.49655	2.8798	-1.53249	-1.59132	-1.37441	-0.79222	-1.15718	-1.12207	-1.67499	-1.63592	1.87381	-1.63778	-0.468135	-1.29147	-1.57603	2.38649	1.39618	-1.65392	3.9245	2.9484	1.20081	1.6711	-1.45027	1.11479	-1.41896	-0.7093	2.57046	-0.884943	1.58722	2.35547	-1.50963	2.60045	-1.14451
hsa-miR-6717-5p	-2.58434	6.84588	-20.3493	2.09417e-53	1.31013e-51	110.959	DOWN	7.81216	7.63577	8.91046	8.51401	7.66116	7.81216	7.57126	7.61042	8.71606	8.37758	8.44524	8.29854	8.13403	7.68892	7.59814	8.39614	8.91046	8.0894	8.31358	7.74304	7.59814	7.868	8.07172	7.95389	7.92593	8.07172	8.2142	8.53094	8.01548	7.985	7.77076	8.39614	8.2649	7.67375	7.61042	8.07172	8.43012	8.28178	7.82565	8.65844	7.57126	7.94691
hsa-miR-6720-3p	-1.56295	-0.490501	-7.13438	1.24626e-11	5.64782e-11	15.3143	DOWN	-0.0376261	1.43546	5.10893	-1.6019	-0.753	2.32544	0.402804	1.70351	-0.361248	-1.49655	2.93285	-1.53249	2.66741	-1.37441	-0.79222	-1.15718	4.0343	-1.67499	1.76169	-1.45183	2.2775	-1.43374	-1.29147	3.25896	-1.66136	2.86436	0.997744	-1.57398	-1.63472	3.87995	1.54581	-1.45027	2.03756	3.54362	-0.7093	-0.664461	-0.884943	-1.66156	-1.66329	-1.50963	5.38841	-1.14451
hsa-miR-6720-5p	1.60471	1.48623	6.17459	2.96065e-09	1.07412e-08	9.94806	UP	4.0689	-1.56057	1.60496	3.92272	-0.753	4.39171	0.21273	-1.62016	-0.361248	2.43923	-1.08331	1.25656	-1.59132	-1.37441	-0.79222	-1.15718	-1.12207	-0.0654456	-0.30788	-1.45183	-1.63778	3.08366	-1.29147	2.46441	2.51349	2.2231	1.11133	-1.57398	1.01877	-1.64422	-1.4824	-1.45027	1.06385	-1.41896	3.70363	3.16392	-0.884943	2.34264	1.95872	3.07034	3.0919	-1.14451
hsa-miR-6726-3p	1.4203	4.62359	6.88528	5.40695e-11	2.31533e-10	13.8718	UP	5.4927	5.80506	4.78083	-1.6019	4.89502	5.01968	4.7888	5.64091	5.57283	5.0314	-1.08331	-1.53249	5.36288	4.60472	6.1407	3.33492	-1.12207	4.92646	3.62031	4.83805	4.63795	5.2913	5.20672	5.01968	5.33133	4.73369	2.22088	4.72599	5.74847	4.5299	5.32017	3.91525	4.65639	-1.41896	-0.7093	4.69289	3.83797	3.77612	5.39783	4.03968	5.45606	-1.14451
hsa-miR-6728-3p	1.55337	3.81161	7.16776	1.02131e-11	4.65304e-11	15.5101	UP	1.00713	2.79935	-0.462139	0.511374	4.77896	3.9303	4.94538	5.22825	-0.361248	4.19573	-1.08331	-1.53249	3.02598	4.39909	4.88679	2.9484	5.07454	-0.806239	0.19303	2.66741	4.02242	3.18161	4.98447	3.5486	5.22825	4.10893	0.264561	3.59254	2.52346	4.09973	3.72335	4.34023	5.12123	2.43384	-0.7093	3.22967	-0.884943	5.72552	2.35998	-1.50963	2.30183	3.10724
hsa-miR-6731-3p	1.08694	4.12537	5.38322	1.79686e-07	5.21373e-07	5.94622	UP	4.49634	2.99727	4.64901	3.76625	-0.753	3.76843	4.14713	4.75455	5.27092	2.67792	-1.08331	5.96559	4.23676	6.16939	5.58256	3.34105	3.94113	4.93023	2.57502	3.68195	4.16637	3.86757	4.62855	3.58418	3.94298	4.16637	5.13343	4.26586	0.00253478	4.58497	5.05512	5.25614	4.98242	2.93589	4.66352	4.24235	-0.884943	4.38992	4.03615	4.4391	3.96448	4.08442
hsa-miR-6732-3p	1.33549	4.81407	8.23193	1.36148e-14	8.04654e-14	22.0373	UP	5.58763	3.05715	4.85963	5.38603	5.6742	4.00964	4.80581	4.82505	4.29223	5.18151	4.23676	3.03438	2.49747	5.65206	5.58763	5.54611	5.69614	2.22817	4.6691	4.30392	5.12513	5.26021	3.80973	4.72407	4.7408	4.6858	5.2985	4.92252	5.68502	5.08603	3.83167	4.10893	5.2542	5.14087	4.34713	3.2772	5.5058	4.5299	5.27523	3.5227	4.93023	3.57981
hsa-miR-6733-3p	1.04897	0.529935	3.86567	0.000144059	0.000300661	-0.477955	UP	3.4032	1.25656	-1.63331	-1.6019	-0.753	4.21742	-1.63632	-1.62016	-0.361248	3.85807	-1.08331	3.78836	-1.59132	-1.37441	-0.79222	-1.15718	5.53277	-1.67499	-1.63592	1.75956	-1.63778	-1.67642	-1.29147	-1.57603	-0.37187	-1.62534	-1.65392	4.2137	2.42082	-1.64422	1.84564	-1.45027	-1.61629	1.87797	3.60072	-1.66395	-0.884943	1.77436	0.40857	-1.50963	4.61624	-1.14451
hsa-miR-6734-3p	1.98077	3.15929	8.11441	2.89847e-14	1.66694e-13	21.291	UP	4.64901	5.49932	0.441785	-1.6019	4.42771	3.65928	-1.63632	4.26947	-0.361248	3.41764	3.38204	2.96661	4.64705	5.40013	-0.79222	3.48906	-1.12207	3.82986	2.61326	3.07847	3.20002	3.90356	3.70363	5.7668	3.97554	2.01998	2.85565	5.34761	1.91952	2.40219	4.07671	-1.45027	3.73359	-1.41896	-0.7093	4.7678	4.30745	5.32017	4.08063	1.66324	4.25173	-1.14451
hsa-miR-6734-5p	2.76494	2.73679	10.8625	1.80802e-22	1.88519e-21	40.0112	UP	0.203074	4.7408	1.40669	-1.6019	-0.753	-1.33044	0.207609	4.86578	-0.361248	-1.49655	-1.08331	-1.53249	4.18646	-1.37441	-0.79222	-1.15718	-1.12207	-0.812017	-0.317965	3.26271	1.73728	3.10945	4.68379	4.49254	2.68455	2.04744	2.75407	4.82315	3.15324	2.81717	3.51473	-1.45027	2.44121	-1.41896	-0.7093	2.02191	-0.884943	-1.66156	2.6986	-1.50963	-1.60817	-1.14451
hsa-miR-6735-3p	1.47956	3.07308	5.65463	4.59402e-08	1.42487e-07	7.27233	UP	-1.64092	1.92998	5.55739	0.389415	-0.753	2.99727	3.82986	4.39171	-0.361248	3.30675	5.06472	-1.53249	0.65533	-1.37441	3.88174	4.05054	2.79216	2.59491	4.83233	3.60464	4.1341	3.65928	3.57767	3.41286	-0.660357	3.23165	2.63887	2.41435	4.64327	0.386657	-1.4824	-1.45027	2.16496	3.01555	-0.7093	2.16924	3.20002	3.25454	2.04744	5.61405	2.9428	2.60045
hsa-miR-6736-3p	2.7844	2.43657	10.0601	5.64383e-20	4.89068e-19	34.3096	UP	-1.64092	-1.56057	2.82907	4.03246	-0.753	4.17201	4.0488	0.0965826	-0.361248	-1.49655	-1.08331	-1.53249	4.7678	1.92699	-0.79222	-1.15718	-1.12207	1.88982	2.39171	2.47519	-0.609248	0.169196	-1.29147	1.10787	3.50633	-1.62534	-0.269157	3.187	4.76047	2.70304	2.78981	-1.45027	4.5869	-1.41896	-0.7093	-1.66395	-0.884943	-1.66156	2.49493	2.80384	1.04811	-1.14451
hsa-miR-6737-3p	1.59629	2.23868	5.90426	1.25745e-08	4.22167e-08	8.53526	UP	3.81167	-1.56057	2.81487	3.32441	3.88913	3.80779	3.67369	-1.62016	-0.361248	-1.49655	4.1149	-1.53249	-1.59132	3.76843	-0.79222	-1.15718	3.2753	3.3373	3.25256	3.09649	4.23469	1.4012	2.9484	3.55517	0.383413	3.30161	3.26592	-1.57398	2.91739	4.48196	-1.4824	4.89853	0.969209	2.66273	-0.7093	3.9303	-0.884943	4.90039	-1.66329	5.28223	1.90073	-1.14451
hsa-miR-6738-3p	3.18743	1.30865	12.9688	2.96854e-29	4.58692e-28	55.546	UP	1.16171	-1.56057	-0.317965	3.36525	-0.753	-1.33044	0.241948	-1.62016	-0.361248	-1.49655	-1.08331	-1.53249	-1.59132	-1.37441	-0.79222	-1.15718	-1.12207	0.205341	-1.63592	1.60496	-1.63778	-0.920035	3.20002	1.73728	-1.66136	-1.62534	-1.65392	-1.57398	-0.042313	1.05752	-1.4824	1.94436	4.45211	-1.41896	-0.7093	3.13987	-0.884943	0.635552	1.25053	-1.50963	2.86215	-1.14451
hsa-miR-6739-3p	1.10564	0.82005	4.24172	3.21217e-05	7.18955e-05	0.948209	UP	2.73246	-1.56057	4.20255	-1.6019	-0.753	-1.33044	-1.63632	0.568	-0.361248	2.54939	3.99265	1.40669	-1.59132	-1.37441	-0.79222	-1.15718	-1.12207	-0.429909	1.01268	3.00098	0.892922	-0.913548	-1.29147	1.89234	0.181761	-1.62534	-1.65392	1.74914	2.85817	2.33981	1.72357	-1.45027	-1.61629	1.91512	-0.7093	-1.66395	-0.884943	-1.66156	3.15324	-1.50963	0.635552	-1.14451
hsa-miR-6740-3p	3.37543	2.47042	14.0661	7.23256e-33	1.33464e-31	63.8293	UP	1.86953	4.24811	-1.63331	-1.6019	3.90356	-1.33044	1.0872	2.82617	-0.361248	3.08982	-1.08331	-1.53249	-1.59132	-1.37441	-0.79222	-1.15718	-1.12207	2.24219	4.25805	-1.45183	1.35242	2.25567	3.20708	1.23051	1.39618	0.786813	4.93023	1.77686	3.31545	2.14236	4.76047	3.1307	3.68392	1.79793	-0.7093	1.2698	-0.884943	1.37618	0.870206	1.82205	-1.60817	-1.14451
hsa-miR-6740-5p	2.05691	0.848105	7.82836	1.77978e-13	9.59064e-13	19.4998	UP	-1.64092	-1.56057	4.64327	-1.6019	-0.753	-1.33044	-1.63632	-1.62016	-0.361248	2.64585	-1.08331	4.07671	-1.59132	-1.37441	-0.79222	4.41663	-1.12207	2.75616	-1.63592	-1.45183	-1.63778	-1.67642	-1.29147	0.597096	-1.66136	2.44836	3.346	-1.57398	2.20483	-1.64422	2.13168	-1.45027	-1.61629	-1.41896	-0.7093	2.08821	-0.884943	0.247109	-1.00322	-1.50963	3.23165	-1.14451
hsa-miR-6741-3p	2.21248	3.97073	10.4743	2.96503e-21	2.78583e-20	37.2335	UP	5.50161	-1.56057	2.35547	5.20672	-0.753	2.13374	4.68938	3.21483	4.61624	4.77547	3.02598	2.33021	4.68003	2.23494	-0.79222	3.1307	-1.12207	3.53658	4.56533	4.56533	4.5186	5.09332	4.85963	4.55293	4.1848	4.16242	3.65176	4.23676	4.34896	3.36727	4.36057	4.10432	2.24219	-1.41896	-0.7093	3.73966	3.40838	5.8517	5.23223	4.03615	5.22388	-1.14451
hsa-miR-6742-3p	2.54462	1.73748	9.59265	1.48544e-18	1.16163e-17	31.0665	UP	-1.64092	0.983344	1.87381	-1.6019	3.52452	4.96071	1.49141	1.82936	-0.361248	-1.49655	-1.08331	-1.53249	0.63003	-1.37441	-0.79222	-1.15718	-1.12207	-1.25877	1.85002	2.87528	1.9419	-1.67642	3.94665	4.63795	3.88579	3.19108	2.5212	-1.57398	-1.63472	-1.64422	3.26592	-1.45027	5.73111	-1.41896	-0.7093	-0.468135	-0.884943	2.62847	3.1307	3.04588	-1.60817	-1.14451
hsa-miR-6744-3p	1.60759	1.56576	5.71635	3.34702e-08	1.05598e-07	7.58075	UP	-1.64092	-1.56057	3.76406	-1.6019	3.44543	4.46999	2.89601	-1.62016	-0.361248	2.08821	-1.08331	-1.53249	3.31979	-1.37441	-0.79222	3.21483	-1.12207	1.03253	4.68379	3.2377	0.764248	-1.67642	-1.29147	-1.57603	2.59223	0.527146	2.17882	-1.57398	-1.63472	-1.64422	-1.4824	4.1149	4.14363	-1.41896	-0.7093	1.46713	-0.884943	0.21273	0.518087	3.25256	-1.60817	2.57274
hsa-miR-6745	1.57659	1.01367	5.64134	4.91676e-08	1.51946e-07	7.20623	UP	3.96013	2.9405	-1.63331	-1.6019	-0.753	-1.33044	-0.531161	-1.62016	-0.361248	1.70152	4.40594	-1.53249	-1.59132	-1.37441	-0.79222	-1.15718	-1.12207	0.127491	4.36646	1.54313	-1.63778	2.07064	-1.29147	-1.57603	-0.0530304	2.97524	-1.65392	-1.57398	-1.63472	-1.64422	1.73508	-1.45027	2.24655	3.52911	-0.7093	1.95392	-0.884943	-0.324061	-1.66329	3.70551	-1.60817	-1.14451
hsa-miR-6746-5p	-1.24792	7.34785	-26.2772	2.5933e-71	4.7513e-69	152.035	DOWN	7.74304	7.36533	8.24849	8.7593	7.89693	7.77076	7.54583	7.57126	7.89693	7.83912	8.19863	8.36271	7.99923	7.868	7.61042	8.10339	8.78166	8.11801	8.02865	7.868	7.39662	7.70433	7.92593	7.74304	7.66116	7.92593	7.75579	8.16719	8.0894	7.92593	7.78486	7.9113	8.07172	7.93993	8.0583	7.93993	8.2649	8.41383	7.89693	8.62172	7.42691	8.2649
hsa-miR-6747-3p	2.18923	3.61656	9.55392	1.94244e-18	1.51439e-17	30.8006	UP	4.89123	-1.56057	0.65533	-1.6019	4.14363	2.84856	4.32034	4.09591	-0.361248	3.61329	4.32213	3.1554	2.1739	4.59265	-0.79222	4.46508	-1.12207	3.50427	3.89261	4.66352	1.98383	4.17201	4.344	3.30161	1.46713	4.92449	4.84427	2.72349	3.6297	4.29061	4.59265	4.08442	3.48281	-1.41896	-0.7093	5.03944	3.65549	3.28286	4.37395	-1.50963	1.49731	-1.14451
hsa-miR-6747-5p	-1.03878	3.96868	-4.55477	8.49525e-06	2.03078e-05	2.22138	DOWN	2.9451	-1.56057	5.78394	-1.6019	5.11327	-1.33044	4.75268	4.85785	5.64935	5.04686	5.70189	3.63781	5.19835	2.02384	3.54362	5.16324	4.32914	5.20043	4.85201	5.10149	5.00986	4.88323	4.5565	5.23644	3.53887	5.5649	5.18151	5.9208	5.30265	5.83287	5.5781	5.72552	6.05075	4.73713	-0.7093	4.99997	5.73111	5.00575	3.80361	5.10337	3.85807	3.1307
hsa-miR-6748-3p	2.45272	3.00346	9.65292	9.77727e-19	7.69285e-18	31.4811	UP	1.90973	-1.56057	2.23256	4.13191	-0.753	3.26592	-0.3013	3.20369	-0.361248	3.56606	-1.08331	-1.53249	3.58824	4.94538	4.75642	4.70383	3.25454	3.0857	-1.63592	2.64585	-0.164161	2.65092	2.17882	3.00556	1.73948	2.47091	4.76593	4.24421	2.82176	1.3936	5.22825	4.36253	5.05061	2.48753	-0.7093	4.22873	-0.884943	4.00761	0.679656	3.54362	4.3112	-1.14451
hsa-miR-6748-5p	-1.00862	4.89417	-7.42568	2.15345e-12	1.03632e-11	17.0423	DOWN	4.62652	3.69958	6.28646	4.06709	4.79822	4.39909	5.10893	4.72214	-0.361248	5.31796	5.01773	5.10893	6.11074	4.98038	4.51115	5.2413	4.66726	5.78394	5.59787	6.11798	5.41586	5.77878	5.83986	5.96559	5.58256	6.02674	6.06192	5.53036	5.90175	5.9265	5.95214	5.76034	5.9384	5.10337	5.31574	5.83287	5.78948	5.67142	5.53518	6.09062	6.11798	5.42027
hsa-miR-6749-3p	1.223	4.84128	6.81921	7.93652e-11	3.34272e-10	13.4949	UP	6.28217	2.54939	4.57035	4.15517	5.73362	4.85607	5.2542	4.89312	5.61951	4.05258	3.89261	-1.53249	3.67999	4.32213	4.80954	4.4391	-1.12207	3.22132	5.05512	5.05061	5.59787	5.55209	5.57283	5.3701	5.31574	4.96895	4.36828	4.99592	5.37447	1.76657	5.53036	4.98823	5.4634	2.3185	4.95715	4.55091	4.89502	5.61951	5.64091	4.34023	4.55293	-1.14451
hsa-miR-6750-3p	2.86433	3.39038	11.826	1.54042e-25	1.95603e-24	47.0357	UP	3.83572	4.71469	4.1397	5.51554	-0.753	2.78077	4.83999	3.9962	-0.361248	3.34105	-1.08331	1.69239	-1.59132	-1.37441	3.30161	-1.15718	-1.12207	3.35643	1.55886	2.61326	3.68744	4.27296	4.52616	2.16496	2.45891	4.26405	3.62031	-1.57398	4.97632	0.91977	3.94484	3.16392	4.13629	-1.41896	-0.7093	4.56865	-0.884943	3.67174	4.17379	3.93754	4.19923	-1.14451
hsa-miR-6751-3p	2.56676	2.1841	9.25474	1.51825e-17	1.13537e-16	28.7632	UP	-1.64092	-1.56057	2.87307	1.71697	-0.753	-1.33044	2.31347	3.99094	-0.361248	-1.49655	-1.08331	1.97928	3.68392	-1.37441	-0.79222	-1.15718	-1.12207	-1.67499	2.35314	2.40806	0.99473	6.05458	2.83654	-1.57603	3.11518	3.45834	0.6671	4.05975	-1.63472	-1.64422	-1.4824	5.09332	2.6536	-1.41896	-0.7093	-0.0297217	-0.884943	-1.66156	-1.66329	2.40512	1.10068	-1.14451
hsa-miR-6751-5p	4.06596	2.46685	16.4781	7.54613e-41	2.12701e-39	82.14	UP	1.20081	3.40579	-1.63331	-1.6019	-0.753	2.21374	-1.63632	3.79176	-0.361248	-1.49655	-1.08331	-1.53249	-1.59132	-1.37441	-0.79222	-1.15718	2.92444	2.59491	0.11543	2.61796	0.606589	2.83654	-1.29147	4.10662	3.22967	2.50049	-0.485496	1.02202	1.59224	3.51274	4.47655	2.50615	-1.61629	-1.41896	-0.7093	-0.881996	-0.884943	2.90043	2.75407	-1.50963	3.59647	-1.14451
hsa-miR-6753-3p	2.89097	2.0983	11.2731	9.07812e-24	1.01241e-22	42.9834	UP	4.58883	-1.56057	4.93023	-1.6019	-0.753	-1.33044	3.58418	-1.62016	-0.361248	-1.49655	-1.08331	5.23223	-1.59132	-1.37441	-0.79222	-1.15718	-1.12207	-0.599172	2.91367	3.74171	0.853713	2.5088	2.37743	0.570754	2.43152	1.18783	-0.658565	1.69239	2.54684	1.48542	-1.4824	-1.45027	3.46919	5.78394	-0.7093	1.58451	-0.884943	1.4012	1.85246	3.83971	-1.60817	-1.14451
hsa-miR-6754-3p	3.54193	2.82155	15.0423	4.24369e-36	9.07089e-35	71.2412	UP	3.52087	-1.56057	2.7302	-1.6019	-0.753	-1.33044	3.17544	2.9451	-0.361248	-1.49655	-1.08331	-1.53249	-1.59132	-1.37441	-0.79222	-1.15718	-1.12207	3.45386	3.91911	1.58973	3.01747	3.2377	2.24219	-1.57603	3.71302	3.59859	1.4012	3.20369	3.23573	4.31856	2.55384	-1.45027	0.892922	2.23256	-0.7093	3.1706	-0.884943	0.0766217	1.33398	-1.50963	0.923298	-1.14451
hsa-miR-6757-3p	2.16315	1.6402	8.27234	1.04857e-14	6.28409e-14	22.2953	UP	2.44836	2.22817	-1.63331	-1.6019	-0.753	-1.33044	1.36851	1.0872	4.67094	-1.49655	-1.08331	-1.53249	-1.59132	-1.37441	-0.79222	-1.15718	-1.12207	-0.835011	2.29345	-1.45183	2.20953	3.26592	2.56199	-1.57603	4.06529	0.414261	-0.388713	-1.57398	-1.63472	3.61329	-1.4824	3.90356	-1.61629	-1.41896	4.09591	0.350061	-0.884943	5.05061	3.32812	4.87348	0.786813	-1.14451
hsa-miR-6758-3p	1.17602	0.108858	4.89651	1.83414e-06	4.7473e-06	3.69703	UP	-1.64092	3.32441	-1.63331	-1.6019	-0.753	-1.33044	-1.63632	1.64125	-0.361248	-1.49655	-1.08331	-1.53249	0.275613	-1.37441	-0.79222	-1.15718	-1.12207	-1.06941	-1.63592	-1.45183	-1.63778	-1.67642	2.34647	-1.57603	-1.66136	3.48503	2.26082	-1.57398	-1.63472	2.6084	-1.4824	-1.45027	4.52804	-1.41896	-0.7093	4.30745	-0.884943	0.926826	2.54188	2.77628	-1.60817	-1.14451
hsa-miR-6758-5p	2.29165	2.35342	8.40182	4.52171e-15	2.82194e-14	23.1265	UP	1.71448	4.42046	2.71641	-1.6019	-0.753	3.43085	-1.63632	0.241948	-0.361248	-1.49655	-1.08331	-1.53249	-1.59132	3.03649	-0.79222	-1.15718	-1.12207	-1.67499	1.90511	-1.45183	3.5945	3.37149	2.58651	-1.57603	0.799961	4.1274	3.24504	-1.57398	3.13289	-1.64422	1.64663	1.75225	0.291774	-1.41896	-0.7093	2.92091	-0.884943	1.85246	3.68568	-1.50963	2.87086	-1.14451
hsa-miR-6759-3p	1.76469	4.07211	7.9754	7.03252e-14	3.89598e-13	20.416	UP	3.38779	4.05258	2.42541	-1.6019	3.76843	3.73756	4.82505	4.7827	-0.361248	5.15699	4.09973	-1.53249	4.62141	-1.37441	4.40594	-1.15718	-1.12207	3.80361	4.75844	2.71882	4.57409	5.03547	5.41127	4.27126	3.17748	3.5639	3.13289	1.924	4.64327	3.90534	4.71469	4.26767	5.29597	3.66736	-0.7093	3.6424	-0.884943	3.79176	4.06529	5.38365	4.58149	4.69114
hsa-miR-6759-5p	2.08656	3.92839	9.16793	2.74263e-17	2.02733e-16	28.1775	UP	0.137596	4.90416	5.23024	2.97973	3.80007	3.04332	4.86379	3.81167	-0.361248	-1.49655	5.22825	-1.53249	3.2772	2.54939	-0.79222	-1.15718	-1.12207	5.40013	3.80361	3.2377	4.42607	4.39714	4.65639	4.65073	4.89123	4.63442	4.22114	4.17023	4.23676	5.0818	4.65639	3.97554	3.42404	-1.41896	-0.7093	5.11713	-0.884943	4.14363	5.11327	4.88901	3.2734	-1.14451
hsa-miR-6760-3p	1.67122	3.0528	6.52975	4.14873e-10	1.61775e-09	11.8722	UP	-0.110383	-1.56057	4.08442	5.66297	-0.753	4.77896	4.20804	1.83473	-0.361248	2.02384	-1.08331	4.82505	3.24299	-1.37441	4.51463	2.98375	-1.12207	2.71882	4.15517	3.95049	3.08366	4.03246	3.346	1.1749	4.10432	3.09858	4.16637	-1.57398	4.94153	4.58149	-1.4824	5.24986	3.38779	-1.41896	-0.7093	4.01139	-0.884943	2.19929	2.66741	4.45388	-1.60817	3.10067
hsa-miR-6760-5p	-2.03077	5.11474	-11.7598	2.51598e-25	3.13276e-24	46.5479	DOWN	4.58323	5.40466	6.9407	6.88227	5.65206	6.43103	5.8768	5.6032	6.20004	6.00583	5.7668	6.92964	5.82415	5.82705	5.393	6.62948	6.63407	6.22219	6.26125	6.04693	5.80852	5.91445	6.33574	6.24579	5.96559	5.97948	6.05458	6.20364	5.77878	6.49207	5.5109	6.03368	6.9407	5.57283	3.56174	5.83986	6.37834	6.43899	5.34274	6.67121	5.26234	6.73982
hsa-miR-6761-3p	2.90236	2.93156	10.9823	7.57846e-23	8.13337e-22	40.875	UP	5.27977	-1.56057	-1.63331	0.489909	4.39909	-1.33044	3.59647	2.66507	-0.361248	-1.49655	4.64705	-1.53249	-1.59132	-1.37441	-0.79222	-1.15718	2.57274	1.88982	3.21126	4.96895	-1.63778	4.20627	3.70739	2.21867	0.22193	3.66287	4.18132	0.7507	3.70919	3.16633	-1.4824	4.41663	5.27977	5.41356	-0.7093	-0.774348	3.44543	4.4391	3.02196	4.61809	3.52911	-1.14451
hsa-miR-6762-3p	2.88838	2.08472	10.8484	2.00285e-22	2.07988e-21	39.9096	UP	3.93572	-1.56057	4.32213	-1.6019	-0.753	-1.33044	3.29647	-1.62016	-0.361248	-1.49655	-1.08331	2.07064	-1.59132	-1.37441	-0.79222	-1.15718	-1.12207	2.13661	3.16151	-1.45183	3.14218	2.12477	4.14713	-1.57603	4.0488	1.80887	2.17157	-1.57398	3.75415	2.63887	-1.4824	-1.45027	2.11964	-1.41896	-0.7093	3.39241	4.6858	0.584713	5.87065	-1.50963	2.9484	-1.14451
hsa-miR-6764-3p	1.42937	0.768446	5.41994	1.49823e-07	4.39894e-07	6.12272	UP	0.372383	-1.56057	-0.354461	1.90292	-0.753	-1.33044	-0.164161	3.032	-0.361248	-1.49655	-1.08331	4.47655	-1.59132	-1.37441	-0.79222	5.74847	4.14713	3.02962	-1.63592	1.77686	-1.63778	2.67202	-1.29147	-1.57603	1.0872	1.98633	0.392174	1.76169	-1.63472	3.21126	3.24299	-1.45027	-0.103561	2.28895	-0.7093	2.14947	-0.884943	-1.66156	-1.66329	-1.50963	3.88376	-1.14451
hsa-miR-6764-5p	2.58636	1.46055	9.77827	4.0833e-19	3.33649e-18	32.3468	UP	4.05054	-1.56057	3.38779	-1.6019	-0.753	3.65549	-1.63632	-1.62016	-0.361248	-1.49655	-1.08331	3.81548	-1.59132	-1.37441	-0.79222	3.17952	-1.12207	-0.649533	-1.63592	-1.45183	-1.63778	-0.196435	-1.29147	2.35998	1.74602	3.2772	3.46919	3.3901	1.9492	-1.64422	2.52847	-1.45027	-1.61629	-1.41896	4.5299	4.3701	-0.884943	-1.66156	-1.66329	-1.50963	-1.60817	-1.14451
hsa-miR-6765-3p	-1.4613	7.54593	-15.2395	9.42774e-37	2.14001e-35	72.74	DOWN	7.88185	8.73805	8.36271	7.04373	9.71488	7.868	7.8526	8.11801	8.2302	7.32884	8.15064	7.62351	9.18815	8.19863	8.56592	8.04255	6.67121	8.16719	9.00229	8.46354	8.95476	9.49296	7.83912	9.37804	8.71606	9.74785	8.67584	8.01548	9.32848	8.56592	7.41369	7.49237	8.79195	7.57126	9.62635	8.39614	8.36271	7.8526	8.7593	7.58504	8.49513	10.3025
hsa-miR-6765-5p	1.10115	10.3885	28.5757	9.5082e-78	3.04857e-75	166.781	UP	9.96219	9.74785	9.6861	8.82378	10.0023	9.77904	9.96219	10.2631	10.0023	9.74785	9.84625	9.6861	9.37804	9.88292	9.81194	9.4016	9.13985	9.9438	9.81194	9.6535	9.96219	9.96219	9.9254	9.9254	10.1812	10.1812	9.9254	9.59648	10.0911	9.96219	9.96219	9.77904	9.6535	10.1812	9.77904	10.1812	9.84625	9.84625	10.3025	9.4523	10.1812	9.77904
hsa-miR-6767-5p	1.59228	1.88196	5.58133	6.67098e-08	2.02498e-07	6.90928	UP	-1.64092	4.34713	-1.63331	-1.6019	3.6424	-1.33044	0.740335	1.61168	-0.361248	3.32812	-1.08331	-1.53249	3.79176	-1.37441	-0.79222	3.74788	-1.12207	3.2772	4.5565	-1.45183	3.30161	0.455752	-1.29147	3.26271	0.591513	2.84466	3.06573	2.45378	3.36727	1.95392	2.79935	-1.45027	4.3112	-1.41896	-0.7093	5.38841	-0.884943	3.1554	0.711144	-1.50963	4.01495	-1.14451
hsa-miR-6769a-3p	1.10531	4.31491	5.9742	8.68601e-09	2.98654e-08	8.89637	UP	5.53036	-1.56057	5.26021	3.71718	4.70033	4.65442	5.2413	3.4032	5.14478	5.5781	4.22473	2.04744	5.52078	4.81535	4.0037	2.66741	4.57409	3.10067	2.42541	5.59787	4.64327	4.4391	5.01578	1.53817	5.169	4.23262	5.0314	4.34896	5.8768	4.37395	4.31664	-1.45027	2.37042	5.16531	3.78421	4.02242	4.33671	4.88679	4.32914	3.97947	0.880452	3.13748
hsa-miR-6769b-3p	1.15171	3.6347	5.32821	2.35505e-07	6.7119e-07	5.68363	UP	5.26234	-1.56057	4.52616	1.84564	-0.753	3.37149	4.13629	3.26986	-0.361248	3.52087	5.89864	0.9441	4.38408	3.37506	3.73171	3.0751	6.43899	3.80973	4.15145	2.63887	4.50575	3.70739	4.20627	3.65928	4.83611	3.02962	4.20255	4.78476	4.99997	4.88501	3.92829	3.26271	5.03944	3.85207	-0.7093	3.81548	6.33574	4.44298	4.61198	-1.50963	3.89976	-1.14451
hsa-miR-6770-3p	2.44197	3.49042	10.2375	1.60645e-20	1.46119e-19	35.5564	UP	2.26683	1.28214	5.24572	-1.6019	-0.753	5.00389	2.37042	2.8016	-0.361248	2.38649	3.26592	-1.53249	5.19381	3.42183	-0.79222	-1.15718	-1.12207	3.15073	3.86757	2.66741	-1.63778	2.91739	2.2835	-1.57603	4.53943	2.97147	4.49254	3.80007	4.26767	2.25825	2.16496	-1.45027	0.40857	-1.41896	-0.7093	1.37847	4.58149	4.57768	3.79799	1.6249	3.86416	-1.14451
hsa-miR-6771-3p	1.52108	2.5175	5.62163	5.4364e-08	1.66998e-07	7.10843	UP	4.53782	1.8247	3.41974	4.72214	-0.753	-1.33044	2.67497	2.76263	4.92252	3.58418	-1.08331	1.39101	3.26271	-1.37441	-0.79222	5.31109	-1.12207	-1.67499	4.32213	3.52452	2.07611	2.18109	-1.29147	4.7678	4.4391	3.70739	2.96235	4.17757	4.79422	4.6691	3.94846	4.24049	5.30684	-1.41896	3.86416	5.2775	4.94153	1.06069	1.78266	4.75455	-1.60817	-1.14451
hsa-miR-6772-3p	3.36097	1.42865	13.9398	1.89061e-32	3.43931e-31	62.8723	UP	2.6986	-1.56057	1.10787	2.50615	-0.753	-1.33044	-1.63632	-1.62016	-0.361248	-1.49655	-1.08331	-1.53249	-1.59132	-1.37441	-0.79222	2.83197	4.0615	1.6364	-1.63592	2.82617	-1.63778	-1.67642	-1.29147	-1.57603	0.337852	-1.62534	-1.65392	-1.57398	3.53658	3.38779	3.19108	-1.45027	3.1957	-1.41896	-0.7093	-1.66395	-0.884943	2.46918	0.127491	-1.50963	2.78981	-1.14451
hsa-miR-6772-5p	1.36444	4.34656	6.79859	8.94238e-11	3.72963e-10	13.3777	UP	3.90166	1.51354	4.39171	2.78484	-0.753	3.05715	4.61809	4.49634	5.32017	3.15756	-1.08331	4.38611	2.36315	5.45357	-0.79222	-1.15718	3.01555	3.73171	5.41127	6.00583	4.7678	5.2913	4.84427	5.30684	4.20804	5.4434	4.93023	4.29398	4.24811	3.56606	4.11671	5.32916	4.9902	1.74602	-0.7093	5.15252	5.43914	5.14877	4.96699	0.957539	5.09332	2.88446
hsa-miR-6773-3p	2.75107	1.61784	10.7848	3.17318e-22	3.22984e-21	39.4525	UP	1.73948	-1.56057	-1.63331	-1.6019	-0.753	-1.33044	0.626552	-0.149922	-0.361248	-1.49655	-1.08331	-1.53249	-1.59132	-1.37441	-0.79222	-1.15718	-1.12207	1.26318	-1.63592	-1.45183	4.26767	0.300048	2.16924	-1.57603	2.49493	4.3701	-0.0734217	1.67604	-0.13057	-0.135574	-1.4824	2.43923	1.2698	-1.41896	-0.7093	0.6918	-0.884943	3.68952	3.01747	2.91103	1.39869	-1.14451
hsa-miR-6774-3p	2.17456	0.725769	8.38115	5.17387e-15	3.21331e-14	22.9933	UP	-1.64092	3.7282	-1.63331	-1.6019	-0.753	3.83572	-1.63632	3.26431	-0.361248	-1.49655	-1.08331	-1.53249	-1.59132	-1.37441	-0.79222	-1.15718	-1.12207	0.962887	-1.63592	1.4609	-1.63778	-1.67642	-1.29147	-1.57603	2.94675	-1.62534	0.350061	-1.57398	-1.63472	0.793539	-1.4824	-1.45027	-1.61629	-1.41896	-0.7093	2.24219	-0.884943	0.088287	-1.66329	-1.50963	1.00076	-1.14451
hsa-miR-6775-3p	1.84882	2.78941	7.37482	2.93466e-12	1.39655e-11	16.7375	UP	1.1475	-1.56057	4.50381	-1.6019	4.3701	3.1706	4.24235	3.64011	-0.361248	5.06272	2.95302	-1.53249	2.33266	2.22088	-0.79222	-1.15718	-1.12207	0.0340391	2.83197	4.56	3.74788	4.55471	2.88446	2.3185	1.90292	3.3373	3.68744	2.24219	4.34023	2.43152	-1.4824	2.86657	-1.61629	-1.41896	-0.7093	-1.15138	-0.884943	3.02962	-1.66329	4.7678	2.51893	2.82396
hsa-miR-6776-3p	3.19417	2.78893	12.2523	6.45175e-27	8.99388e-26	50.1913	UP	3.10724	4.60472	3.31979	1.38479	-0.753	4.6397	2.10062	4.09973	-0.361248	3.60072	-1.08331	-1.53249	-1.59132	-1.37441	-0.79222	-1.15718	-1.12207	-1.67499	-1.63592	3.39876	3.95618	3.88579	4.04706	-1.57603	2.88446	4.51115	3.58621	3.99265	3.32812	3.35015	4.06529	3.48906	5.28468	-1.41896	-0.7093	3.21939	-0.884943	0.174035	-1.05672	-1.50963	3.90356	-1.14451
hsa-miR-6778-3p	2.72821	2.28827	10.4813	2.82014e-21	2.65943e-20	37.2833	UP	3.79176	2.3891	3.73171	-1.6019	-0.753	2.20953	1.15355	0.839361	-0.361248	-1.49655	-1.08331	-1.53249	4.69289	-1.37441	3.80779	-1.15718	-1.12207	-0.952256	-1.63592	4.41143	-1.63778	-0.0826413	-1.29147	1.92176	3.69958	1.55111	0.786813	-1.57398	4.01862	3.2772	2.14947	3.93754	4.86777	3.56816	-0.7093	2.89189	-0.884943	3.50839	3.97192	3.26431	-1.60817	-1.14451
hsa-miR-6779-3p	2.56488	3.32019	9.86876	2.16791e-19	1.8113e-18	32.9747	UP	4.8286	0.679656	-1.63331	1.65502	3.94484	-1.33044	3.4032	3.58418	5.27523	5.19608	-1.08331	3.10067	-1.59132	1.82936	-0.79222	-1.15718	-1.12207	-0.51827	1.52724	5.03547	4.69289	4.29952	5.08603	4.29952	4.22294	0.853713	-1.65392	3.90534	2.71641	4.55293	4.77136	4.23676	5.10526	-1.41896	-0.7093	-1.03863	4.26586	4.6858	4.59265	-1.50963	4.41486	-1.14451
hsa-miR-6780a-3p	3.54735	0.950131	16.3569	1.89532e-40	5.11736e-39	81.2222	UP	-1.64092	-1.56057	2.99194	-1.6019	-0.753	-1.33044	0.873235	-1.62016	-0.361248	-1.49655	-1.08331	-1.53249	1.97928	-1.37441	-0.79222	-1.15718	-1.12207	-1.67499	-1.63592	-1.45183	-1.63778	-0.82035	-1.29147	2.8798	-0.890978	-1.62534	-1.65392	2.35998	-0.117648	1.19403	-1.4824	-1.45027	-1.61629	-1.41896	-0.7093	-1.66395	-0.884943	-1.66156	-1.66329	-1.50963	-1.60817	-1.14451
hsa-miR-6780a-5p	2.1529	2.76351	8.1977	1.69759e-14	9.94135e-14	21.8194	UP	2.46441	4.72785	3.56606	-1.6019	-0.753	3.28491	1.31018	0.626552	-0.361248	2.84071	3.79383	-1.53249	0.447037	-1.37441	-0.79222	-1.15718	-1.12207	3.24299	1.79793	-1.45183	3.36322	2.59223	-1.29147	3.85405	-0.146817	4.27296	4.26405	2.33021	3.85207	3.38779	-1.4824	3.0919	-1.61629	-1.41896	3.81167	4.27811	3.31762	4.97632	4.81341	3.33254	4.20255	4.41663
hsa-miR-6780b-3p	1.07134	4.15311	5.67592	4.11981e-08	1.28244e-07	7.37841	UP	5.34985	2.15987	5.3378	3.66287	4.72407	2.36632	3.53429	4.42046	5.9384	4.26586	4.64705	4.435	5.17332	4.344	4.73713	4.98242	3.96448	3.15953	3.13748	4.45971	3.77612	3.9831	4.70033	4.87946	5.09332	4.13629	5.31109	3.93933	5.49702	4.21176	4.36057	4.72599	2.85817	4.54708	4.90608	5.05061	5.63807	2.52346	4.82505	2.16242	3.40838	2.52346
hsa-miR-6781-3p	1.55136	1.02873	5.88294	1.40665e-08	4.68578e-08	8.42586	UP	0.6918	2.32311	-1.63331	-1.6019	-0.753	-1.33044	-1.63632	-1.62016	-0.361248	-1.49655	-1.08331	1.10787	1.50568	2.15227	-0.79222	-1.15718	-1.12207	3.7282	-0.407778	-1.45183	0.695926	0.241948	-1.29147	-1.57603	2.47519	-1.62534	1.59224	-1.57398	0.360883	-1.64422	4.05463	2.714	1.57093	-1.41896	-0.7093	2.73246	-0.884943	0.8355	3.60464	-1.50963	3.38417	-1.14451
hsa-miR-6782-3p	2.62818	2.64638	10.3182	9.04657e-21	8.31701e-20	36.1262	UP	3.45834	3.93572	0.923298	-1.6019	-0.753	2.59223	0.635552	2.14236	-0.361248	-1.49655	-1.08331	-1.53249	1.14459	3.15756	-0.79222	-1.15718	-1.12207	4.67281	4.41309	3.2772	2.24655	3.18161	2.64823	1.3739	2.89601	2.79935	2.08149	-1.57398	3.65928	4.05632	4.27639	-1.45027	2.79693	-1.41896	-0.7093	6.07707	-0.884943	2.12719	3.22325	2.40512	3.85807	-1.14451
hsa-miR-6783-3p	2.32656	2.02679	8.25541	1.16988e-14	6.96227e-14	22.1871	UP	1.89446	-1.56057	-0.0478652	1.67604	-0.753	-1.33044	4.52616	1.69239	-0.361248	1.07646	-1.08331	2.56199	-1.59132	2.91367	-0.79222	-1.15718	-1.12207	1.69934	-1.63592	-1.45183	3.78836	3.81695	3.19108	4.51463	-0.695728	-1.62534	1.34568	-1.57398	-0.310426	-1.64422	-1.4824	3.92628	-1.61629	1.60496	-0.7093	3.75616	-0.884943	2.05059	-1.66329	5.23887	-1.60817	-1.14451
hsa-miR-6784-3p	1.62774	3.69568	6.8587	6.31153e-11	2.67588e-10	13.7199	UP	2.19131	4.87946	5.78948	2.19659	4.93422	5.18151	4.1397	2.67202	-0.361248	1.76657	3.31545	3.66512	5.05061	-1.37441	3.87816	3.55274	-1.12207	2.99727	4.05463	4.5489	4.32914	4.1848	4.51115	4.65639	3.91911	0.0366913	4.81147	3.48503	3.68568	2.39614	4.50768	5.2985	5.30265	2.79935	-0.7093	4.29223	-0.884943	2.91103	4.2137	-1.50963	3.44752	-1.14451
hsa-miR-6784-5p	1.41286	11.8675	22.3863	9.16908e-60	9.79946e-58	125.551	UP	12.3088	12.1357	10.8541	10.5613	11.1643	11.3691	12.2507	11.4216	10.8938	10.8153	11.4216	11.0203	11.2138	11.5336	11.9767	10.6642	10.8938	11.1179	10.8153	11.2642	11.5336	12.3088	12.037	11.2642	11.3187	10.8938	11.0203	11.1179	11.4216	11.4732	11.7445	11.8722	10.9742	12.2507	11.1179	10.9346	10.9346	11.0203	12.1633	10.8153	11.8006	11.0708
hsa-miR-6785-5p	1.29177	8.43734	18.277	9.55078e-47	3.60261e-45	95.6756	UP	7.41369	7.62351	7.74304	7.29077	7.55832	7.62351	7.58504	7.16294	7.73003	7.66746	7.75579	7.22434	7.39062	7.46683	7.64764	7.77076	7.71619	7.81216	8.15064	7.81216	7.58504	7.66116	8.02865	7.50615	7.49237	7.61042	7.63577	7.75579	7.82565	7.82565	7.88185	8.18226	8.11801	7.49237	6.63876	7.57126	8.01548	7.99212	7.63577	8.16719	7.93293	8.13403
hsa-miR-6786-3p	2.07231	3.91874	8.69497	6.57419e-16	4.34608e-15	25.0331	UP	3.45834	2.9577	5.08975	-1.6019	3.51672	4.72785	4.08997	3.77612	4.4391	4.84213	5.27977	3.50839	2.00561	4.93422	-0.79222	-1.15718	-1.12207	5.393	4.54103	5.02757	4.28183	3.85604	3.99436	3.61803	5.17543	4.04137	4.5	4.36449	4.48196	3.62031	4.60103	-1.45027	3.72335	4.20627	-0.7093	3.95816	4.50768	4.36253	4.62289	3.30675	5.08603	-1.14451
hsa-miR-6787-3p	3.0282	2.9391	13.0682	1.402e-29	2.23362e-28	56.2926	UP	1.64125	1.04811	2.46918	-1.6019	-0.753	-1.33044	2.97973	1.31948	4.38408	3.67564	5.31574	-1.53249	2.40806	2.75407	-0.79222	-1.15718	-1.12207	2.04253	2.5088	2.62847	0.903446	3.20369	3.28286	5.21932	3.33033	3.65363	-0.331772	-1.57398	3.51056	3.69359	2.37042	-1.45027	1.924	-1.41896	-0.7093	2.83654	3.12178	3.04332	2.6986	-1.50963	4.77896	-1.14451
hsa-miR-6787-5p	-1.53681	9.08515	-25.5263	3.79063e-69	6.48198e-67	147.072	DOWN	9.4523	9.6861	10.2185	9.4523	9.9254	9.96219	9.74785	9.47975	10.4543	9.77904	9.74785	10.4227	9.88292	9.9254	9.6535	10.5955	11.1179	10.3025	10.6332	10.0911	9.9254	9.71488	9.56733	9.71488	9.35229	10.0911	10.0911	9.84625	10.0451	10.136	9.6861	10.5257	10.0023	10.2185	9.25686	10.4543	10.3025	8.86813	9.4523	9.59648	9.9254	9.74785
hsa-miR-6788-3p	3.2995	2.17153	13.0825	1.25834e-29	2.01728e-28	56.4002	UP	-1.64092	0.700052	3.57289	-1.6019	-0.753	-1.33044	-1.63632	3.64725	-0.361248	-1.49655	2.67792	-1.53249	-1.59132	-1.37441	-0.79222	-1.15718	-1.12207	-1.17804	3.25896	-1.45183	1.52724	3.3799	3.58418	2.17882	3.85207	3.3221	-1.65392	-1.57398	3.4623	0.252383	-1.4824	4.42953	3.23967	-1.41896	-0.7093	3.81167	-0.884943	1.36547	3.71718	-1.50963	0.812139	-1.14451
hsa-miR-6788-5p	1.82476	0.333202	7.57051	8.86039e-13	4.44753e-12	17.9172	UP	2.18109	-1.56057	-1.63331	3.05507	-0.753	-1.33044	-1.63632	-1.62016	-0.361248	-1.49655	-1.08331	-1.53249	-1.59132	-1.37441	-0.79222	-1.15718	-1.12207	-1.06941	-1.63592	-1.45183	-0.398935	0.8355	-1.29147	3.13289	-1.66136	1.33398	-1.65392	-1.57398	2.01998	1.84783	3.60677	-1.45027	-1.61629	-1.41896	-0.7093	-1.66395	-0.884943	-0.822274	-1.66329	2.71882	-1.60817	-1.14451
hsa-miR-6789-3p	1.74692	3.46746	7.49188	1.43674e-12	7.0734e-12	17.4409	UP	2.77628	5.13694	0.0910522	-1.6019	4.80192	4.91671	3.91718	4.95312	-0.361248	1.52046	-1.08331	-1.53249	3.2808	-1.37441	3.38779	-1.15718	-1.12207	5.16531	3.05072	2.34264	3.75214	4.42607	4.49634	3.88913	2.9577	3.89798	3.55966	2.95302	2.43923	4.29952	4.85963	5.18774	-1.61629	-1.41896	-0.7093	5.03547	-0.884943	4.23676	4.5	2.14947	4.6066	-1.14451
hsa-miR-6790-3p	2.28167	4.27569	8.30962	8.23588e-15	4.97059e-14	22.5339	UP	4.75268	6.44735	2.83654	0.337852	-0.753	5.8768	3.15756	4.57035	-0.361248	3.3799	-1.08331	4.344	5.12318	4.12405	5.45357	-1.15718	-1.12207	5.68785	4.93961	5.169	4.43136	4.81928	4.83611	5.19835	4.94538	5.72552	5.06272	4.56865	5.11713	5.14877	5.4927	3.95251	4.83422	-1.41896	-0.7093	6.86541	-0.884943	5.01578	5.62477	5.74847	4.12217	-1.14451
hsa-miR-6790-5p	1.77475	4.55632	7.90711	1.08372e-13	5.92693e-13	19.9892	UP	3.59039	4.39171	2.80384	0.347183	5.27977	-1.33044	5.08391	5.21932	-0.361248	4.89502	4.7888	-1.53249	5.00193	4.42046	-0.79222	-1.15718	-1.12207	5.73613	4.59469	4.344	5.24572	4.90608	4.38088	4.74857	4.8173	5.18987	3.44962	5.07637	4.53586	4.81535	5.14478	4.79422	3.35843	-1.41896	-0.7093	4.80581	-0.884943	5.20251	5.25809	3.59254	4.61624	-1.14451
hsa-miR-6792-3p	1.58749	4.40082	7.0516	2.03675e-11	9.06989e-11	14.8313	UP	4.72214	4.64901	3.01364	4.3112	-0.753	4.95715	4.96502	5.08975	-0.361248	5.17332	4.46838	3.71506	2.59759	4.52616	-0.79222	-1.15718	3.93389	4.17023	3.90918	4.99997	5.08975	5.34761	5.46811	5.393	4.80954	5.31109	4.38088	4.80767	5.05512	5.06272	5.91763	5.44855	4.56694	-1.41896	-0.7093	2.78077	-0.884943	4.5489	5.07022	-1.50963	5.51554	-1.14451
hsa-miR-6794-3p	2.93532	2.82051	12.5911	5.09917e-28	7.51688e-27	52.7162	UP	2.59759	-1.56057	3.93389	1.41243	-0.753	4.04306	3.03438	-1.62016	-0.361248	-1.49655	-1.08331	1.45453	-1.59132	2.50049	-0.79222	-1.15718	-1.12207	1.83204	3.7621	3.77986	-1.63778	3.04332	-1.29147	-1.57603	4.48006	3.20539	2.98971	3.22325	5.17332	3.7016	2.2912	-1.45027	2.80605	2.82617	-0.7093	3.69559	4.79622	3.87632	2.65603	-1.50963	3.0386	-1.14451
hsa-miR-6795-3p	1.54935	3.88584	6.97874	3.12928e-11	1.36507e-10	14.4091	UP	1.59817	-1.56057	5.06272	-1.6019	4.32213	4.60103	4.25173	3.60464	4.45035	4.31472	-1.08331	2.09581	3.84871	4.45388	-0.79222	3.43085	-1.12207	4.81535	4.46162	4.29573	4.76047	4.70033	2.99194	4.56371	5.12513	4.19177	4.57768	3.46919	5.42924	4.16637	3.187	3.22325	2.66971	-1.41896	4.96071	3.7959	5.05061	4.33486	4.20627	-1.50963	2.37743	-1.14451
hsa-miR-6796-5p	1.90211	3.77204	8.58021	1.40401e-15	9.11718e-15	24.2827	UP	2.61326	-1.56057	2.26082	2.48996	3.4623	3.78836	2.4432	-1.62016	-0.361248	1.69717	5.34985	2.45378	0.8355	3.71098	-0.79222	3.90534	4.08997	-1.67499	4.72214	4.95893	3.65549	2.86215	4.79822	4.94153	4.69666	4.47159	3.71718	4.90039	4.63442	4.22673	4.34557	3.59647	3.75415	-1.41896	3.48906	2.18335	5.17754	4.85607	4.78681	-1.50963	4.5319	3.11725
hsa-miR-6797-3p	1.73609	4.09444	8.3122	8.09929e-15	4.89969e-14	22.5504	UP	4.38088	4.25593	-1.63331	2.21163	3.55759	4.00557	4.40978	5.06672	-0.361248	4.77136	-1.08331	5.24986	3.46032	4.70033	4.95124	2.9451	-1.12207	4.85963	5.00389	4.92252	4.47326	4.87536	4.21928	4.48908	5.29597	4.74443	4.89853	4.67468	4.67281	3.89798	4.13629	3.65363	1.80887	-1.41896	-0.7093	4.83999	3.78204	4.79822	0.533398	4.54526	2.55161	-1.14451
hsa-miR-6798-5p	1.1508	10.1821	23.5151	3.37556e-63	3.93559e-61	133.429	UP	9.4016	9.16404	9.25686	9.59648	9.96219	9.6861	9.23446	9.59648	9.74785	9.6535	10.136	9.4523	9.9254	9.6861	9.62635	9.56733	9.4523	9.9438	9.59648	9.35229	9.6861	9.37804	8.95476	9.47975	9.86458	9.96219	9.62635	9.28104	9.23446	9.50618	9.04921	9.62635	9.37804	9.4523	9.88292	9.50618	10.0023	9.71488	9.28104	9.30392	9.02374	9.50618
hsa-miR-6799-3p	1.52184	2.23826	5.68983	3.83596e-08	1.20284e-07	7.44794	UP	-1.64092	3.59254	2.86215	4.094	-0.753	2.83654	4.47159	2.36632	-0.361248	2.20483	2.98375	3.75616	-1.59132	3.99436	-0.79222	-1.15718	-1.12207	3.53658	-1.63592	-1.45183	4.04706	3.57552	-1.29147	1.02202	-0.637328	4.42771	0.419678	1.64663	1.85246	3.41764	3.60677	-1.45027	-1.61629	-1.41896	-0.7093	-1.66395	-0.884943	2.39614	-0.701087	3.87816	4.89853	3.73359
hsa-miR-6800-5p	1.23139	8.4428	19.5457	7.63363e-51	3.99597e-49	105.08	UP	8.02865	7.70433	7.57126	7.62351	7.82565	8.02865	8.16719	7.77076	7.46683	7.96913	8.04255	8.13403	7.68892	7.985	8.13403	8.19863	7.75579	7.62351	7.75579	8.07172	7.73003	8.15064	8.2142	7.868	7.63577	7.66116	7.4534	7.57126	7.55832	7.83912	8.01548	7.96913	7.80472	8.16719	7.74304	7.42691	7.50615	7.37779	8.32161	7.37779	8.29854	7.94691
hsa-miR-6802-3p	1.52776	3.93076	7.19116	8.88004e-12	4.07465e-11	15.6477	UP	4.77896	3.4933	4.6247	-1.6019	4.47159	4.03615	4.65639	3.37748	4.57589	-1.49655	3.10502	2.86436	4.28507	4.15708	-0.79222	3.42404	3.97554	3.12864	4.6691	4.95312	4.46838	3.91718	4.64146	3.28884	5.05699	5.06272	4.44298	3.68744	4.75642	4.77721	4.01139	1.84564	4.64901	5.82705	-0.7093	3.82809	5.10526	5.01212	4.75642	2.74067	3.37506	-1.14451
hsa-miR-6804-3p	2.33635	4.30021	10.2098	1.95502e-20	1.77196e-19	35.3615	UP	4.95312	3.9245	5.4927	-1.6019	-0.753	5.86461	5.22388	4.72972	5.28468	4.96699	2.71882	1.36851	4.22114	3.75214	4.7827	2.48753	-1.12207	3.79799	3.0278	3.62031	5.12123	5.13694	4.89312	4.94937	4.74443	4.32584	5.04499	5.26856	4.83805	5.13343	5.20251	3.66955	4.02047	1.72863	-0.7093	4.36253	-0.884943	3.3135	5.07454	2.83654	3.9245	-1.14451
hsa-miR-6805-5p	1.05593	10.7188	21.108	8.49473e-56	7.0287e-54	116.448	UP	10.6642	10.0451	9.77904	9.28104	10.4227	10.5613	10.1812	10.4227	9.88292	10.0451	10.1812	9.84625	10.1812	10.3402	10.4909	9.53519	9.42722	9.71488	9.71488	10.1812	10.4227	10.4543	10.6977	10.2185	10.3025	10.0023	9.96219	10.1812	10.4543	10.3849	10.5955	9.9254	9.74785	10.4909	10.6642	9.74785	9.96219	10.4909	10.5955	10.2631	10.5955	10.2185
hsa-miR-6809-3p	2.76957	2.41694	10.565	1.54697e-21	1.49172e-20	37.8794	UP	5.44127	-1.56057	1.37847	-1.6019	-0.753	-1.33044	4.45584	-1.62016	-0.361248	3.93389	4.3701	-1.53249	4.45388	3.53658	-0.79222	-1.15718	5.9384	1.87589	-0.0530304	-1.45183	2.91739	1.21911	-1.29147	1.6607	4.51463	1.8247	0.775739	3.77799	3.73359	4.80192	1.39869	-1.45027	-1.61629	3.2808	-0.7093	-0.768404	-0.884943	-0.70583	3.74376	1.31948	4.20627	-1.14451
hsa-miR-6810-3p	1.73325	3.57149	7.24991	6.2427e-12	2.88514e-11	15.9944	UP	2.42921	-1.56057	3.41974	-1.6019	4.51115	4.89677	3.66736	3.346	5.43427	4.63058	4.26211	3.5188	4.66726	2.27166	-0.79222	3.2945	4.80954	-0.639139	0.744213	3.90356	4.435	4.26586	4.4028	5.11327	4.39909	-1.62534	4.89502	4.49081	4.14713	4.88501	1.91243	5.34761	4.96071	4.6985	-0.7093	4.55091	5.28915	3.35643	3.75616	-1.50963	2.33266	-1.14451
hsa-miR-6810-5p	1.0935	4.10009	5.41442	1.53987e-07	4.49859e-07	6.0961	UP	5.54611	2.44836	5.18151	3.50633	-0.753	3.4806	4.91886	4.5186	-0.361248	3.94484	5.92936	2.76263	0.619265	-1.37441	4.08442	5.20251	3.10724	4.83611	4.47817	4.79251	4.19573	4.57222	4.77547	3.37149	5.06272	4.99997	4.56694	3.55966	2.89189	4.72972	2.4432	4.95715	4.80192	5.08975	3.81548	2.53638	3.30161	2.14947	-0.781856	3.11518	0.849646	5.09332
hsa-miR-6812-3p	1.77525	2.37501	6.84217	6.94735e-11	2.93574e-10	13.6256	UP	4.77136	2.93285	4.15899	-1.6019	-0.753	2.35081	1.41789	4.68379	-0.361248	2.07611	3.5945	-1.53249	-1.59132	3.68744	-0.79222	4.37395	-1.12207	0.0197087	3.07034	-1.45183	2.714	1.97404	4.20255	5.46811	4.59265	5.03343	-1.65392	-1.57398	4.79822	1.15355	3.86757	3.91125	4.35862	-1.41896	-0.7093	2.19659	5.02757	-1.66156	5.2662	-1.50963	3.77244	-1.14451
hsa-miR-6813-3p	1.25214	4.48595	6.54675	3.76946e-10	1.4852e-09	11.9662	UP	5.93222	3.68392	3.28884	3.45834	-0.753	4.92646	4.22114	4.74443	5.64935	5.08975	-1.08331	2.23256	4.82126	4.52252	-0.79222	2.75407	-1.12207	4.34557	5.23223	3.82233	4.41854	5.03944	5.35677	5.14877	5.21276	4.57035	2.64347	4.86379	5.39783	4.57409	4.28183	4.04306	3.26986	-1.41896	4.72214	3.50159	4.10432	3.4623	4.90608	4.87348	3.67174	2.78981
hsa-miR-6813-5p	2.19905	5.35492	13.0944	1.15013e-29	1.8554e-28	56.4897	UP	3.65176	2.5333	1.16171	-1.6019	5.06079	5.77878	5.37693	5.61119	6.04693	4.52252	4.04506	4.26405	3.41525	5.18562	4.07277	-1.15718	-1.12207	1.98633	5.50161	5.14087	5.2985	5.38152	5.26234	5.48305	5.66864	5.28223	4.26017	5.46811	5.21932	5.31109	5.65206	5.48305	3.78628	4.31856	-0.7093	4.65818	5.51554	5.0314	5.5409	-1.50963	5.0314	-1.14451
hsa-miR-6814-3p	2.37922	1.24799	8.8974	1.70403e-16	1.19096e-15	26.3691	UP	0.286152	4.69289	1.12166	-1.6019	-0.753	-1.33044	-1.63632	1.75225	-0.361248	-1.49655	-1.08331	2.65092	0.3215	-1.37441	3.74376	-1.15718	-1.12207	4.59074	3.4806	-1.45183	3.39558	1.42511	-1.29147	3.53887	4.23262	-1.62534	3.55966	1.19403	1.86447	3.0751	1.57706	1.41789	3.09419	-1.41896	-0.7093	5.55474	-0.884943	-1.66156	0.344304	-1.50963	-1.60817	-1.14451
hsa-miR-6815-3p	1.31799	1.58718	4.70457	4.38333e-06	1.09158e-05	2.85739	UP	-0.572222	2.19389	1.77187	-1.6019	-0.753	-1.33044	2.90233	2.78077	-0.361248	2.25567	-1.08331	-1.53249	-1.59132	3.20002	-0.79222	-1.15718	3.4806	2.23731	-1.63592	-1.45183	1.48542	3.032	2.11328	1.79793	-1.66136	0.0507304	0.00791739	1.30743	2.9405	4.4028	-1.4824	1.91512	-0.0980609	4.19375	-0.7093	-1.66395	4.14363	-1.66156	2.1105	4.05632	3.77244	-1.14451
hsa-miR-6815-5p	1.08428	4.44394	5.2023	4.34182e-07	1.20138e-06	5.09047	UP	4.07277	5.17332	2.37976	4.77896	4.08442	4.34896	4.81147	4.74857	-0.361248	4.47655	-1.08331	3.62525	1.60496	3.65363	4.42046	3.32812	-1.12207	5.13694	5.11713	4.03054	4.98038	4.98038	4.7408	5.78948	5.3378	5.34274	4.73369	5.2542	4.45211	4.85607	5.43914	4.8286	4.5	-1.41896	4.1203	5.69614	-0.884943	5.26427	5.36288	5.16117	2.34647	4.74443
hsa-miR-6817-3p	1.04781	1.00748	3.85513	0.000150018	0.000312587	-0.516286	UP	5.48829	3.05072	0.900417	4.18646	-0.753	-1.33044	2.73246	-1.62016	-0.361248	2.714	-1.08331	-1.53249	-1.59132	4.10202	-0.79222	-1.15718	-1.12207	-1.67499	-0.158965	-1.45183	2.34647	-1.67642	-1.29147	-1.57603	4.34896	-1.62534	-1.65392	-1.57398	-1.63472	4.01677	2.60332	-1.45027	0.455752	4.6858	3.82809	-0.575396	5.06272	3.17952	-1.66329	-1.50963	2.6986	3.6297
hsa-miR-6818-3p	1.61331	0.336058	6.71843	1.41896e-10	5.82343e-10	12.9245	UP	2.45891	-1.56057	0.548735	-1.6019	-0.753	-1.33044	-1.63632	0.505544	-0.361248	-1.49655	-1.08331	-1.53249	-1.59132	-1.37441	-0.79222	-1.15718	-1.12207	-0.19415	-1.63592	-1.45183	-1.63778	-1.19685	-1.29147	-1.57603	-1.66136	-1.62534	-1.65392	-1.57398	-1.63472	-1.64422	-1.4824	3.9303	0.489909	2.33981	-0.7093	-0.110383	5.77878	-1.66156	-1.66329	-1.50963	-1.60817	-1.14451
hsa-miR-6820-3p	2.60613	3.10137	11.2934	7.81938e-24	8.75839e-23	43.1318	UP	4.33671	-1.56057	2.75019	-1.6019	3.44125	-1.33044	2.6084	2.39917	5.70189	3.21126	-1.08331	1.05752	5.01578	2.47774	-0.79222	-1.15718	-1.12207	2.92981	1.99136	3.50427	3.44543	2.82176	4.22473	4.91039	3.7282	4.00182	4.5489	4.99592	4.81535	4.08252	5.21062	5.45856	4.0265	-1.41896	-0.7093	1.14168	4.63058	1.39101	1.84317	-1.50963	0.363876	-1.14451
hsa-miR-6821-3p	1.51958	2.03975	5.35643	2.05042e-07	5.91599e-07	5.81807	UP	2.45378	0.597096	-1.63331	-1.6019	-0.753	-1.33044	3.47367	-1.62016	-0.361248	-1.49655	-1.08331	5.08603	-1.59132	3.44962	4.01677	-1.15718	-1.12207	2.78484	1.89234	-1.45183	3.86757	0.471187	3.06136	3.80361	3.77244	1.94436	1.15053	2.87528	3.82233	-1.64422	4.87536	-1.45027	3.48906	-1.41896	-0.7093	2.31347	-0.884943	2.92091	4.87536	-1.50963	2.14735	-1.14451
hsa-miR-6822-3p	1.8753	0.99872	6.85656	6.39041e-11	2.70485e-10	13.7077	UP	0.483209	5.47857	-1.63331	-1.6019	-0.753	-1.33044	-1.63632	-1.62016	-0.361248	-1.49655	-1.08331	-1.53249	-1.59132	-1.37441	-0.79222	-1.15718	-1.12207	3.19786	3.23967	-1.45183	1.76169	0.372383	-1.29147	3.42404	2.68455	-1.62534	0.849646	1.4609	0.937652	0.886648	1.39869	3.10067	-1.61629	-1.41896	-0.7093	4.70033	-0.884943	0.812139	-1.66329	-1.50963	0.394524	-1.14451
hsa-miR-6822-5p	-1.28129	5.0799	-9.00809	8.0945e-17	5.86508e-16	27.1059	DOWN	4.94538	6.03368	4.79822	4.35079	5.3378	5.4634	6.86541	5.78948	6.32009	6.0121	4.70033	5.56246	5.49702	6.07707	4.98823	5.67142	5.86461	6.57914	5.78948	5.74203	5.75729	5.89864	6.36099	5.73111	5.61405	5.82125	6.07707	6.1883	6.02674	5.36518	5.83986	4.90416	5.90175	2.39171	-0.7093	5.93222	4.1848	5.36057	6.18432	5.47047	5.4634	5.04686
hsa-miR-6823-3p	1.74362	3.58788	7.34862	3.44018e-12	1.62207e-11	16.581	UP	4.29573	1.46713	4.29061	2.06839	-0.753	4.47494	4.95715	4.1185	4.22114	4.62652	-1.08331	1.76657	-1.59132	3.17544	-0.79222	-1.15718	5.10337	4.35268	-1.63592	4.3701	3.96828	3.89441	4.54526	4.92646	4.69666	4.80581	3.56606	3.54362	4.04306	3.6424	4.67828	-1.45027	3.12178	2.46918	-0.7093	-1.66395	-0.884943	-1.66156	3.65928	4.02437	4.23676	3.68392
hsa-miR-6824-3p	1.61106	2.61238	6.02463	6.63989e-09	2.30465e-08	9.15869	UP	3.83572	3.25454	-1.63331	1.88982	4.15145	-1.33044	4.35456	3.16151	-0.361248	-1.49655	2.74544	1.28821	-1.59132	2.88624	-0.79222	-1.15718	4.45971	-0.290465	-1.63592	4.42771	2.49239	3.6089	5.04686	-1.57603	2.05973	4.13191	3.96638	4.14538	3.96231	4.00964	3.22547	-1.45027	4.95312	4.93422	-0.7093	3.26986	-0.884943	4.50381	2.86871	2.37976	4.28345	-1.14451
hsa-miR-6825-5p	2.5051	6.54002	20.2101	5.79282e-53	3.45548e-51	109.945	UP	5.76034	4.43318	4.33301	4.13191	4.63058	5.2662	5.41586	5.2913	5.82705	5.83287	5.26427	4.2137	5.94583	5.35677	5.40243	6.02674	4.0689	5.8461	5.26021	4.49254	5.70775	5.22388	5.63523	5.2985	5.14087	5.14678	5.55209	5.41586	5.13694	5.67142	5.40466	4.75844	5.74203	6.73041	4.79422	5.61951	4.72018	5.73362	4.64146	1.574	5.99586	5.43914
hsa-miR-6826-3p	2.78083	3.4321	11.8034	1.82238e-25	2.30266e-24	46.8685	UP	4.20982	-1.56057	3.8601	3.23967	4.73541	-1.33044	1.58722	1.2698	-0.361248	2.13374	-1.08331	-1.53249	4.13629	3.52911	3.76014	-1.15718	3.6916	2.51349	4.74857	2.98375	3.4933	4.15517	4.69666	0.937652	2.30183	4.29952	0.626552	2.86215	5.34985	4.02437	4.95715	3.1445	1.90073	3.59039	-0.7093	3.5486	4.25173	2.63887	3.70739	2.83654	2.08149	-1.14451
hsa-miR-6827-3p	1.80248	2.39239	7.03237	2.28175e-11	1.01083e-10	14.7196	UP	5.55739	-1.56057	2.45891	3.34105	-0.753	2.24655	3.44543	2.49747	-0.361248	-1.49655	4.87536	2.70756	2.93589	-1.37441	-0.79222	-1.15718	3.09858	2.11328	3.09419	-1.45183	2.75407	-0.564239	3.8601	2.68672	3.37149	0.957539	-0.37187	4.30392	4.42607	3.41062	3.9831	-1.45027	1.34286	-1.41896	3.96828	-1.66395	-0.884943	3.44543	4.65245	4.38814	4.98447	4.13629
hsa-miR-6827-5p	1.63841	4.51551	8.7272	5.30782e-16	3.54546e-15	25.2448	UP	5.42476	2.43923	3.4933	2.42541	-0.753	3.77986	4.82126	4.94538	5.34985	4.00557	4.5565	4.93961	2.47774	5.22388	4.22114	6.12949	-1.12207	0.912717	3.8711	3.35643	4.55293	4.5319	3.84144	-1.57603	4.26586	4.04137	4.40786	3.88746	4.17201	4.76227	4.16242	4.27126	4.61809	5.10893	4.48196	4.28507	5.42252	1.23724	5.42027	-1.50963	4.38088	3.61803
hsa-miR-6829-3p	1.8363	3.23846	7.02048	2.4477e-11	1.07876e-10	14.6506	UP	3.17952	-1.56057	1.43546	2.56745	-0.753	2.7052	4.23262	3.1307	-0.361248	2.48483	-1.08331	3.71098	-1.59132	3.48906	5.98584	-1.15718	-1.12207	5.25203	3.9321	3.1706	3.5317	4.08063	4.37763	4.29573	4.4028	4.32213	2.30183	4.52616	4.15517	3.88579	3.16633	-1.45027	0.360883	-1.41896	-0.7093	-1.66395	-0.884943	3.96638	3.4961	-1.50963	4.14929	2.98375
hsa-miR-6830-3p	2.99526	2.08713	11.5568	1.12795e-24	1.35196e-23	45.0562	UP	0.779735	4.13191	-0.257059	-1.6019	-0.753	-1.33044	-1.63632	2.1739	-0.361248	-1.49655	-1.08331	2.34647	-1.59132	3.5486	4.82126	-1.15718	-1.12207	-0.760383	1.65502	3.31979	0.309706	1.8061	3.0386	4.74261	0.0743348	-1.62534	0.744213	3.62031	3.53658	-0.339157	4.40978	4.138	1.90073	-1.41896	-0.7093	-0.542591	-0.884943	4.12966	3.41286	-1.50963	1.11479	-1.14451
hsa-miR-6831-5p	3.33297	4.24673	14.8426	1.94664e-35	4.09273e-34	69.7237	UP	2.82907	3.38417	2.9577	-1.6019	-0.753	-1.33044	1.63113	4.83611	-0.361248	2.01998	-1.08331	-1.53249	-1.59132	3.96828	-0.79222	-1.15718	-1.12207	3.93389	4.37395	4.08784	3.25256	4.1203	3.48503	4.77721	4.8716	2.64117	3.81548	4.1149	0.711144	4.51661	5.06672	5.32442	3.21483	-1.41896	-0.7093	4.90608	-0.884943	3.28884	5.13891	2.00323	-1.60817	3.94846
hsa-miR-6833-3p	1.4569	3.34078	5.76839	2.55781e-08	8.23185e-08	7.84279	UP	3.05507	1.30401	-1.63331	-1.6019	-0.753	-1.33044	3.59039	3.91325	-0.361248	3.35843	5.35677	3.92628	2.64117	-1.37441	-0.79222	-1.15718	3.83167	0.7507	2.1739	3.9303	3.9303	3.62793	4.12573	4.35079	4.27126	2.51349	-0.644087	4.91455	4.52434	3.4806	4.48744	3.44962	1.3252	4.07671	4.72599	-1.66395	4.8286	3.78836	2.85817	4.46673	3.31545	4.57222
hsa-miR-6834-5p	-1.0277	2.99514	-3.7876	0.000194065	0.000397585	-0.759518	DOWN	3.13509	2.87528	2.84071	1.97928	-0.753	-1.33044	5.09332	3.25058	-0.361248	5.4634	5.36518	5.78948	2.47264	-1.37441	-0.79222	3.68744	-1.12207	2.9484	2.50351	4.69289	4.1341	4.26586	4.56694	4.87536	4.96502	4.51115	4.11309	3.33254	4.0615	3.52452	4.20982	-1.45027	3.91718	3.94484	4.13629	4.75642	4.81341	3.8263	5.14877	4.05632	2.75616	5.12513
hsa-miR-6835-3p	-1.64293	0.872695	-5.58911	6.41308e-08	1.95595e-07	6.94765	DOWN	-1.64092	3.34105	5.66864	-1.6019	-0.753	2.79935	3.71506	2.27458	4.56533	3.73359	4.00761	4.57222	0.731387	4.59888	5.18356	-1.15718	5.47857	1.02527	-1.63592	-1.45183	1.55629	2.22563	-1.29147	4.68177	2.08485	-0.20223	2.14524	1.16171	2.73246	0.402804	1.85002	3.11312	-1.61629	1.89234	4.68177	3.91718	-0.884943	1.65502	1.91952	-1.50963	3.7959	5.28915
hsa-miR-6835-5p	1.63704	3.21403	6.09695	4.50538e-09	1.60281e-08	9.53761	UP	5.59787	-1.56057	4.435	-1.6019	-0.753	4.41309	3.46708	2.32776	-0.361248	4.15899	-1.08331	-1.53249	1.45771	-1.37441	-0.79222	-1.15718	3.80361	-1.67499	-0.0631	4.20255	4.6985	3.73171	4.48579	4.59265	3.13289	4.21556	3.75001	3.73966	4.84635	-0.110383	3.10067	-1.45027	5.23223	4.61198	-0.7093	4.25805	-0.884943	3.01364	1.91512	3.24504	4.93422	2.75407
hsa-miR-6838-3p	-2.21343	-0.107702	-8.56793	1.52231e-15	9.83557e-15	24.2027	DOWN	-1.64092	-1.56057	1.70991	-1.6019	-0.753	3.89621	1.90511	2.71882	-0.361248	-1.49655	4.1274	3.48906	2.04744	-1.37441	-0.79222	4.89853	4.87536	-1.67499	4.74443	-1.45183	-1.63778	-0.881996	-1.29147	-1.57603	3.89261	3.25058	-0.279474	-1.57398	1.67337	1.34286	2.58651	-1.45027	0.217309	-1.41896	-0.7093	-1.66395	3.90356	-1.66156	2.21374	-1.50963	-1.60817	4.51115
hsa-miR-6839-3p	-1.27943	-0.159212	-5.35586	2.05618e-07	5.92595e-07	5.81534	DOWN	-1.64092	-1.56057	3.97554	3.3373	-0.753	-1.33044	0.99473	2.03283	-0.361248	-1.49655	5.34985	3.02196	-1.59132	-1.37441	3.77244	-1.15718	-1.12207	-1.67499	1.3279	2.72795	-0.572222	0.316983	2.14524	-1.57603	-1.66136	1.34849	0.146804	2.84856	-0.0826413	0.880452	-1.4824	-1.45027	-1.61629	-1.41896	-0.7093	2.59759	-0.884943	-1.66156	-1.66329	-1.50963	2.1739	-1.14451
hsa-miR-6841-3p	1.98067	1.0948	7.9123	1.04876e-13	5.748e-13	20.0216	UP	4.55825	3.40579	-1.63331	5.16531	-0.753	-1.33044	-1.63632	1.73508	-0.361248	-1.49655	-1.08331	4.64901	-1.59132	-1.37441	-0.79222	-1.15718	-1.12207	-1.67499	-1.63592	-1.45183	-1.63778	1.73508	2.56199	-1.57603	-0.93183	0.754228	-1.65392	0.67427	4.10432	1.11479	-1.4824	2.30408	-1.61629	4.44298	-0.7093	1.16171	-0.884943	-1.66156	3.93389	3.62258	1.69239	-1.14451
hsa-miR-6842-3p	-1.19418	0.603997	-4.43431	1.42936e-05	3.35129e-05	1.72243	DOWN	5.86461	4.28183	1.88982	1.924	-0.753	2.05374	1.63882	-1.62016	-0.361248	-1.49655	4.05258	3.85604	2.43923	2.47264	-0.79222	-1.15718	3.06573	2.95302	2.72349	2.92713	0.169196	-1.18356	-1.29147	1.19403	2.39614	3.64011	0.0790109	-1.57398	4.1848	0.195567	3.7959	2.00799	-1.61629	3.73546	3.52087	-1.66395	-0.884943	-0.731009	3.25454	1.73508	2.97147	3.66736
hsa-miR-6844	-1.44123	-0.405778	-5.89023	1.35382e-08	4.52154e-08	8.46321	DOWN	0.825113	-1.56057	2.99913	-1.6019	-0.753	-1.33044	-1.63632	-1.62016	5.28915	4.39345	-1.08331	1.44116	-1.59132	4.90225	-0.79222	-1.15718	4.89853	0.722352	2.2835	-1.45183	-1.63778	0.311709	-1.29147	-1.57603	-1.66136	-1.62534	2.14524	1.81372	-1.63472	3.53887	-1.4824	-1.45027	4.77721	1.65189	4.28507	3.00988	4.25805	-1.66156	-1.66329	-1.50963	0.21502	-1.14451
hsa-miR-6846-3p	2.47269	2.86935	10.1285	3.47932e-20	3.10956e-19	34.7895	UP	3.63148	3.09419	4.37395	2.78484	-0.753	-1.33044	3.346	2.01421	-0.361248	4.47159	-1.08331	-1.53249	4.29763	-1.37441	5.00986	-1.15718	-1.12207	1.77686	2.99727	-1.45183	-1.63778	2.6937	3.14822	1.57706	2.89601	0.452726	4.80386	3.2753	4.73713	4.99216	4.8286	-1.45027	-1.61629	-1.41896	-0.7093	4.42771	-0.884943	2.84466	5.06472	4.49817	-1.60817	-1.14451
hsa-miR-6847-3p	1.39258	1.0226	4.91966	1.64835e-06	4.27505e-06	3.80012	UP	-1.64092	-1.56057	-1.63331	6.07707	-0.753	5.5058	4.16637	-1.62016	-0.361248	1.3739	3.07034	-1.53249	-1.59132	-1.37441	-0.79222	-1.15718	-1.12207	-1.28489	-1.63592	-1.45183	-0.314309	0.40857	-1.29147	2.48213	-1.66136	-1.62534	-1.65392	-1.57398	4.40978	-0.553113	-1.4824	-1.45027	-1.61629	-1.41896	-0.7093	-1.66395	-0.884943	-1.66156	1.0872	3.18904	-1.60817	4.48744
hsa-miR-6847-5p	1.7895	0.692798	6.47044	5.78915e-10	2.20641e-09	11.5456	UP	3.01364	4.1149	2.05973	-1.6019	-0.753	-1.33044	-1.63632	-1.62016	-0.361248	-1.49655	-1.08331	-1.53249	-1.59132	-1.37441	-0.79222	-1.15718	-1.12207	2.69633	-1.63592	-1.45183	-1.63778	0.031387	-1.29147	-1.57603	-1.66136	0.224404	-1.65392	4.4391	-1.63472	-0.305335	-1.4824	3.33254	2.23256	-1.41896	-0.7093	-0.230128	-0.884943	-1.66156	2.91553	3.63781	2.74544	-1.14451
hsa-miR-6848-3p	1.07971	3.82139	4.56574	8.09774e-06	1.93938e-05	2.26739	UP	3.66955	3.44962	3.81167	4.25383	4.73541	3.60677	5.2775	4.03246	4.33301	3.71302	3.41764	4.80767	1.27578	2.89601	-0.79222	2.63375	6.23365	-0.424357	4.18812	4.45035	4.24235	4.37395	5.02546	2.89189	4.9728	4.86777	-1.65392	1.90292	5.34274	3.1706	4.1848	4.52616	4.6858	3.82233	-0.7093	3.09649	3.85604	1.6364	4.62652	1.51122	4.29573	2.62847
hsa-miR-6848-5p	1.05389	7.13841	15.1823	1.45909e-36	3.22636e-35	72.3049	UP	6.48334	6.63876	6.5013	5.95868	6.37834	7.36533	7.46683	6.90836	5.69614	6.73041	6.83266	6.25329	6.70994	6.78104	7.28421	6.07707	5.87065	6.17688	6.69116	6.92964	6.58349	7.30297	6.89867	6.5367	6.47391	6.25727	6.40475	6.09062	6.43103	6.81292	6.41284	7.095	5.88274	6.33574	5.62992	6.20723	6.60678	6.47391	7.02602	6.35197	6.97687	7.04373
hsa-miR-6849-3p	1.97958	2.49907	7.44073	1.9645e-12	9.48952e-12	17.1327	UP	5.14877	2.96448	3.70363	-1.6019	-0.753	-1.33044	3.10724	0.594304	-0.361248	1.95872	-1.08331	3.44962	2.11964	-1.37441	-0.79222	-1.15718	3.85039	0.21273	2.66273	-1.45183	3.71098	3.74376	3.5188	2.32776	1.98633	2.15747	2.82396	5.04686	0.23123	0.67427	-1.4824	3.65928	4.435	4.81341	-0.7093	-1.11748	-0.884943	-1.66156	-1.07404	-1.50963	1.16773	-1.14451
hsa-miR-6849-5p	-1.22059	4.71561	-5.47456	1.14151e-07	3.38885e-07	6.38694	DOWN	-0.605322	5.21711	5.53036	4.38992	5.59787	5.7668	6.26966	5.40243	5.21276	5.45106	5.40466	6.60678	5.5058	5.63523	4.68938	6.32009	6.45623	5.25203	5.32442	5.38841	5.42476	5.81517	6.03368	5.63523	5.81517	5.90816	5.60053	5.4434	5.06272	5.72552	4.91455	5.98584	5.96901	5.33566	-0.7093	5.65206	6.02674	3.84871	2.13374	4.12573	5.42476	3.55759
hsa-miR-6851-3p	1.17563	3.74852	5.39985	1.65506e-07	4.80773e-07	6.02604	UP	6.29462	-1.56057	5.64091	-1.6019	-0.753	4.55293	4.48579	2.69107	-0.361248	2.12962	-1.08331	4.41143	5.27977	4.68177	4.36646	4.03246	4.08997	4.66539	4.6985	3.80007	3.35843	4.23067	5.00389	4.1203	4.57222	3.87995	4.93023	3.28884	4.52434	4.1274	4.71115	5.06672	-1.61629	3.45834	-0.7093	1.87797	3.5486	3.20369	3.88913	1.43831	3.23967	4.6858
hsa-miR-6852-3p	1.91173	1.41834	7.26313	5.76541e-12	2.67419e-11	16.0727	UP	2.84856	-1.56057	2.97147	-1.6019	-0.753	-1.33044	-1.63632	-1.62016	5.27977	2.83654	-1.08331	-1.53249	1.95872	-1.37441	5.14087	3.01747	-1.12207	-1.67499	2.06294	2.41435	-1.63778	2.35998	-1.29147	2.42921	2.47519	-0.121128	-1.65392	3.66955	-1.63472	-0.585152	3.65928	3.10945	3.91125	-1.41896	-0.7093	2.13949	5.80506	-0.0826413	2.59491	-1.50963	-1.60817	-1.14451
hsa-miR-6853-5p	1.08199	0.603819	4.10559	5.59902e-05	0.000122018	0.418718	UP	-1.64092	-1.56057	2.68672	0.799961	-0.753	-1.33044	-1.63632	-1.62016	-0.361248	2.34264	3.0386	2.16242	-1.59132	3.9831	3.77612	5.05061	-1.12207	-1.36828	-1.63592	-1.45183	3.12419	-1.50802	-1.29147	-1.57603	2.04744	4.27811	-1.65392	3.71929	-1.63472	0.283891	-1.4824	2.75407	1.52385	3.4933	-0.7093	2.88624	4.85607	0.198104	0.256787	-1.50963	2.21867	-1.14451
hsa-miR-6854-3p	1.51147	0.351112	5.94798	9.98183e-09	3.40924e-08	8.76062	UP	0.648109	3.83572	-1.63331	2.16496	-0.753	-1.33044	-1.63632	1.47334	-0.361248	-1.49655	-1.08331	-1.53249	-1.59132	-1.37441	-0.79222	-1.15718	-1.12207	0.159209	-1.63592	-1.45183	2.09077	-0.00698261	-1.29147	-1.57603	3.16633	-1.62534	1.92176	-1.57398	-1.63472	-0.35723	3.59647	-1.45027	3.73966	-1.41896	-0.7093	4.73896	-0.884943	2.45378	0.392174	-1.50963	4.04706	-1.14451
hsa-miR-6855-5p	2.77	1.91342	10.189	2.26637e-20	2.0326e-19	35.2148	UP	1.66324	4.59074	1.5089	-1.6019	-0.753	-1.33044	-1.63632	3.78421	-0.361248	-1.49655	-1.08331	1.02202	4.65639	-1.37441	-0.79222	-1.15718	-1.12207	-1.08977	-1.63592	-1.45183	-1.63778	3.39241	-1.29147	3.93933	-1.66136	3.93754	4.29952	2.99727	-1.63472	2.15987	4.14363	-1.45027	-1.61629	-1.41896	-0.7093	3.86934	-0.884943	1.57706	-0.0706065	2.35998	2.83654	-1.14451
hsa-miR-6857-3p	2.26427	2.22167	8.93087	1.36119e-16	9.6716e-16	26.5914	UP	4.67094	-1.56057	-1.63331	1.07646	-0.753	-1.33044	2.77628	-1.62016	-0.361248	-1.49655	-1.08331	4.4028	-1.59132	3.14822	4.01313	-1.15718	-1.12207	0.447037	1.40669	-1.45183	-1.63778	-1.58317	4.50768	3.91911	3.57552	4.46162	-1.65392	-1.57398	4.12405	3.09419	1.98156	-1.45027	-1.61629	4.49254	-0.7093	2.71641	-0.884943	0.471187	-1.66329	2.56745	2.34264	4.87946
hsa-miR-6857-5p	3.02215	4.25565	10.8669	1.75182e-22	1.84156e-21	40.0426	UP	4.70927	0.700052	0.68857	0.736456	3.987	4.0615	6.64345	4.89853	-0.361248	-1.49655	3.06573	3.39241	3.74376	3.77244	5.59787	-1.15718	-1.12207	0.131809	4.73369	5.27977	4.65996	5.42476	5.34985	3.187	4.28183	4.97632	-0.2045	3.09649	4.41854	4.20441	4.09973	4.18812	4.85963	4.17757	-0.7093	0.91977	-0.884943	2.01998	5.63523	-1.50963	5.25614	-1.14451
hsa-miR-6860	1.61343	4.8807	8.64354	9.24268e-16	6.01713e-15	24.6962	UP	4.52252	-1.56057	3.85405	-1.6019	-0.753	3.72577	5.07821	5.17754	4.30392	3.89976	5.36518	1.74602	2.83862	5.2542	3.9303	5.38365	2.73439	5.05887	3.45386	4.02437	4.71292	5.20672	5.18562	5.23223	5.46811	5.85785	4.86379	4.20441	4.1274	5.62477	4.94153	5.36057	5.99264	4.7408	-0.7093	5.09332	5.4434	3.93389	3.12178	-1.50963	4.80954	-1.14451
hsa-miR-6861-3p	1.79133	4.30444	9.01852	7.5447e-17	5.4822e-16	27.1755	UP	5.73111	-1.56057	4.70383	-1.6019	4.31296	3.26986	4.92646	2.714	-0.361248	3.61803	-1.08331	1.86014	3.23165	3.09858	4.76047	3.65928	-1.12207	2.53946	4.435	1.68517	4.07083	4.39714	4.58149	4.02047	4.6858	4.63058	4.29061	4.61023	5.09562	2.90043	4.64509	4.61624	-1.61629	2.33981	4.65996	2.35547	-0.884943	5.30897	5.2149	4.45388	5.02336	4.25173
hsa-miR-6862-3p	1.76627	4.43676	8.21433	1.52509e-14	8.97216e-14	21.9252	UP	4.98823	5.64091	2.26683	-1.6019	4.21742	4.12405	4.97456	5.48305	4.60848	2.77406	-1.08331	-1.53249	4.75455	2.9577	6.11798	-1.15718	-1.12207	3.73966	3.96013	4.87946	4.00761	5.30265	4.71821	4.58883	4.83233	4.54708	4.08252	2.62847	4.7827	4.53782	5.53804	4.05054	0.857109	-1.41896	-0.7093	5.3223	-0.884943	3.86757	3.38598	4.81535	4.18646	2.61796
hsa-miR-6862-5p	1.03538	1.81416	3.75899	0.000216203	0.000440127	-0.861443	UP	2.47091	3.91125	3.28491	-1.6019	-0.753	-1.33044	1.77976	3.71098	-0.361248	-1.49655	-1.08331	-1.53249	3.62258	3.4933	-0.79222	-1.15718	-1.12207	2.22817	4.25805	-1.45183	-1.63778	2.52847	-1.29147	-1.57603	0.144356	1.87589	3.67781	4.50768	2.75019	4.52252	4.10662	-1.45027	-1.61629	-1.41896	-0.7093	4.39519	-0.884943	0.8355	4.01139	2.48213	2.26082	-1.14451
hsa-miR-6863	-1.17905	1.14157	-3.55921	0.000451524	0.000874083	-1.55396	DOWN	-1.64092	3.187	-0.454004	5.28692	-0.753	2.714	3.6297	4.38248	-0.361248	-1.49655	4.5299	-1.53249	3.2277	-1.37441	-0.79222	2.87528	3.87816	0.19303	4.22873	4.86171	0.489909	0.548735	-1.29147	-1.57603	-0.511787	-1.62534	-0.5573	-1.57398	-0.443174	2.17157	-1.4824	-1.45027	-1.61629	-1.41896	-0.7093	1.01877	3.96448	-0.758561	-0.627309	6.41284	-1.60817	4.27811
hsa-miR-6864-3p	-1.32211	1.14853	-4.30451	2.47431e-05	5.62643e-05	1.19743	DOWN	-1.64092	3.46708	4.70927	5.82705	5.16117	4.7827	1.9718	0.127491	4.95715	-1.49655	-1.08331	6.1037	1.84564	3.43085	-0.79222	5.11918	-1.12207	0.0834609	2.88802	-1.45183	2.70088	0.951752	3.79176	-1.57603	-1.66136	3.46919	-0.70583	-1.57398	-1.63472	3.02962	-1.4824	3.6916	4.40594	-1.41896	-0.7093	1.99821	-0.884943	-1.66156	2.07064	-1.50963	-1.60817	5.70775
hsa-miR-6866-3p	1.06046	1.35919	3.59353	0.00039876	0.000778401	-1.4374	UP	0.495617	-1.56057	5.14478	-1.6019	-0.753	-1.33044	1.86447	3.09649	-0.361248	-1.49655	-1.08331	5.00575	2.26082	-1.37441	-0.79222	3.4806	4.57409	1.65189	3.56174	-1.45183	-0.0349261	-1.67642	-1.29147	-1.57603	-1.66136	-1.62534	2.9428	-1.57398	-1.63472	-1.64422	2.2835	3.06573	2.42541	3.68744	-0.7093	0.615456	-0.884943	-1.66156	0.988487	2.18335	2.10772	3.79799
hsa-miR-6867-3p	1.82686	4.03647	8.73007	5.20739e-16	3.48746e-15	25.2637	UP	5.169	3.26986	5.0076	1.91952	-0.753	-1.33044	4.10432	4.05975	4.52434	3.54362	6.44735	3.2471	4.60848	3.35443	4.97456	4.59265	4.25805	3.99436	-1.63592	4.37395	2.32544	4.33301	4.57409	2.55954	1.0872	4.93023	4.47655	4.88679	4.5565	3.26271	3.41286	-1.45027	-1.61629	4.92252	5.75424	3.75214	4.60848	5.27092	4.57768	5.23223	4.44298	5.15252
hsa-miR-6867-5p	2.89848	0.985055	11.5846	9.18838e-25	1.10649e-23	45.2601	UP	-0.0631	-1.56057	0.536644	-1.6019	-0.753	-1.33044	-1.63632	2.5333	-0.361248	-1.49655	-1.08331	-1.53249	-1.59132	-1.37441	-0.79222	-1.15718	-1.12207	-1.67499	-1.63592	-1.45183	1.05107	-1.47245	-1.29147	-1.57603	2.19659	-1.62534	-1.65392	-1.57398	-1.63472	3.73546	-1.4824	-1.45027	0.183704	-1.41896	-0.7093	2.34647	-0.884943	-1.66156	2.9063	-1.50963	-1.60817	-1.14451
hsa-miR-6868-3p	2.28232	2.03454	8.70298	6.23397e-16	4.14252e-15	25.0857	UP	4.80007	-1.56057	2.67202	0.706444	-0.753	-1.33044	0.951752	0.137596	-0.361248	-1.49655	3.28491	-1.53249	1.47334	-1.37441	4.37763	4.05463	-1.12207	1.28821	-1.63592	2.56745	-1.63778	-0.184354	-1.29147	-1.57603	0.229054	-1.62534	4.59074	-1.57398	1.56523	0.302309	3.31545	-1.45027	3.52087	4.36646	-0.7093	4.60472	5.72552	3.45834	-1.66329	2.99194	-1.60817	4.28507
hsa-miR-6868-5p	1.02912	1.00708	3.81158	0.000177186	0.000364753	-0.6736	UP	3.31762	-1.56057	3.33033	-1.6019	-0.753	-1.33044	-1.63632	2.55669	-0.361248	-1.49655	5.32017	-1.53249	1.13526	4.5565	-0.79222	3.12178	5.2775	1.95632	-1.63592	-1.45183	-1.63778	3.59859	-1.29147	2.59491	-0.492017	0.0593174	-0.141509	-1.57398	-1.63472	-1.64422	-1.4824	-1.45027	2.29651	2.50351	-0.7093	2.06294	-0.884943	2.90422	2.06614	4.29573	-1.60817	-1.14451
hsa-miR-6870-3p	2.3098	3.16327	9.06916	5.35851e-17	3.91584e-16	27.5143	UP	3.98897	4.38814	3.86757	1.86014	-0.753	4.18994	-1.63632	-1.62016	-0.361248	3.44752	-1.08331	3.29904	1.73186	3.00556	4.75268	3.57026	-1.12207	3.4933	0.2734	-1.45183	4.39519	2.54939	4.02047	0.976035	4.24811	3.6916	0.873235	4.37203	5.05061	2.25116	4.22473	-1.45027	4.25593	2.62325	3.67564	3.48503	5.14478	4.86777	3.55517	4.61809	3.73966	4.90225
hsa-miR-6870-5p	1.53641	6.90658	15.1921	1.35374e-36	3.01944e-35	72.3795	UP	6.9407	4.61198	6.41284	6.01915	5.2662	6.36099	5.82125	5.74203	6.12597	6.63407	5.49932	4.83233	6.21847	5.83986	5.33351	7.32884	4.17023	5.71924	6.49207	6.20004	5.95214	6.19228	6.0121	6.36099	7.1997	6.42195	6.29905	6.56139	6.8879	6.21475	6.52722	5.43176	5.87373	6.41284	6.79086	6.17688	6.54426	7.4793	6.17688	6.5971	6.69116	6.43103
hsa-miR-6873-3p	3.11266	1.19704	12.3686	2.70225e-27	3.87222e-26	51.057	UP	4.70927	-1.56057	1.28821	-1.6019	-0.753	-1.33044	1.79243	-1.62016	-0.361248	-1.49655	-1.08331	-1.53249	-1.59132	-1.37441	-0.79222	-1.15718	-1.12207	-1.67499	3.64011	-1.45183	-1.63778	1.57093	-1.29147	3.25454	4.23676	2.62847	-1.65392	-1.57398	-1.63472	2.54684	-1.4824	-1.45027	-1.61629	1.99821	-0.7093	-1.66395	-0.884943	3.86757	-1.66329	-1.50963	-1.60817	-1.14451
hsa-miR-6874-3p	1.41296	-0.280113	6.783	9.78545e-11	4.07462e-10	13.2893	UP	-1.64092	-1.56057	2.98375	-1.6019	-0.753	-1.33044	-1.63632	-1.62016	-0.361248	-1.49655	-1.08331	-1.53249	-1.59132	-1.37441	-0.79222	-1.15718	-1.12207	-0.488756	-1.63592	-1.45183	-1.63778	-1.04967	-1.29147	2.74305	-1.66136	-1.62534	-1.65392	-1.57398	4.11671	-1.64422	-1.4824	-1.45027	-1.61629	-1.41896	-0.7093	-0.01735	-0.884943	-1.66156	-1.66329	-1.50963	-1.60817	-1.14451
hsa-miR-6875-3p	1.54688	4.02163	7.50059	1.36197e-12	6.7182e-12	17.4936	UP	4.7465	3.47367	5.0076	3.99993	5.42924	-1.33044	4.0488	4.36449	-0.361248	4.78681	5.28468	3.84496	4.02863	4.91455	-0.79222	-1.15718	5.30265	5.34517	4.23676	4.18812	3.91911	4.53782	4.32584	4.76406	4.92646	4.44634	4.67828	3.53887	3.87447	5.30265	4.29952	1.95872	3.5639	4.14929	-0.7093	3.97373	3.18535	3.48503	4.31296	-1.50963	4.96502	2.77184
hsa-miR-6875-5p	2.11882	8.37235	26.6868	1.76155e-72	3.76531e-70	154.712	UP	6.98822	6.12597	8.07172	7.14427	7.62351	7.83912	7.12574	7.50615	6.64345	8.28178	6.89867	5.80161	7.31679	7.26368	6.67121	7.5187	5.98584	6.78104	7.12574	8.15064	7.63577	7.00951	7.21241	6.99927	7.93993	7.18754	7.5187	6.97687	7.70433	6.52722	7.43362	6.07707	6.70994	6.72043	6.15511	7.4534	6.61624	7.99212	6.89867	6.29462	7.985	5.79527
hsa-miR-6876-3p	2.15473	1.10007	8.19514	1.7258e-14	1.00835e-13	21.8031	UP	-1.64092	-1.56057	0.149252	-1.6019	-0.753	-1.33044	-1.63632	-0.184354	-0.361248	4.31856	-1.08331	-1.53249	-1.59132	-1.37441	-0.79222	4.18132	-1.12207	3.76843	5.04128	2.56745	-1.63778	1.45158	-1.29147	-1.57603	-1.66136	1.47334	-1.65392	3.1957	1.5818	2.58937	3.0751	1.7261	1.57943	1.89658	-0.7093	1.58451	3.88579	3.46708	4.24049	-1.50963	-1.60817	-1.14451
hsa-miR-6876-5p	1.43641	2.82266	5.97636	8.5869e-09	2.95643e-08	8.90757	UP	3.52452	-1.56057	5.169	0.793539	-0.753	-1.33044	4.00964	3.23369	-0.361248	2.9063	3.10945	-1.53249	3.053	1.87797	-0.79222	-1.15718	3.03438	3.8263	3.43085	3.67369	3.20369	1.07646	3.4961	4.53943	3.31545	4.29952	-1.65392	2.84071	4.73369	4.27467	3.15324	3.35015	0.483209	-1.41896	-0.7093	-0.985274	3.48906	2.4432	3.13509	-1.50963	3.08366	2.83654
hsa-miR-6877-3p	1.29075	4.83244	6.17578	2.94159e-09	1.06872e-08	9.95438	UP	6.06192	4.37579	4.30745	4.76406	5.07022	4.10202	5.72552	5.4634	-0.361248	5.70189	2.93285	-1.53249	3.81843	4.81535	5.27092	-1.15718	-1.12207	4.73541	4.91886	5.32916	5.0818	5.26021	5.06672	5.30684	5.4634	5.13891	4.61198	5.24572	5.55209	4.44634	5.77878	-1.45027	3.23573	-1.41896	3.53429	5.13343	4.66539	5.45856	5.70189	3.80361	5.37447	-1.14451
hsa-miR-6878-3p	3.18888	1.19371	13.629	2.00573e-31	3.47615e-30	60.5207	UP	-1.64092	1.29155	4.19748	-1.6019	-0.753	4.00182	2.96448	-1.62016	-0.361248	-1.49655	-1.08331	-1.53249	1.55372	3.76406	-0.79222	-1.15718	-1.12207	2.34864	-1.63592	-1.45183	-1.63778	0.127491	-1.29147	1.60496	-1.66136	-1.62534	-1.65392	0.976035	-1.63472	-0.216552	3.43656	-1.45027	-1.61629	-1.41896	-0.7093	-1.66395	-0.884943	2.43923	3.10285	2.03283	-1.60817	-1.14451
hsa-miR-6878-5p	1.46992	2.28886	5.26495	3.20678e-07	9.0389e-07	5.38419	UP	4.3112	4.47494	1.48542	0.169196	-0.753	-1.33044	3.68952	1.94436	-0.361248	-1.49655	-1.08331	-1.53249	-1.59132	-1.37441	-0.79222	-1.15718	4.14713	4.24616	4.04706	-1.45183	2.63631	3.91125	-1.29147	2.79935	3.14822	4.64705	-1.65392	5.43427	-1.63472	4.36646	2.84071	-1.45027	1.86953	-1.41896	4.00182	2.35081	-0.884943	4.90039	2.76448	-1.50963	3.87816	3.45834
hsa-miR-6879-3p	1.08832	4.9872	5.3276	2.36211e-07	6.72453e-07	5.68073	UP	4.69666	5.06272	5.27523	3.53887	-0.753	6.19228	5.83636	4.96071	4.53943	5.427	5.2985	4.90416	5.10149	5.41356	5.5058	4.18994	4.32034	4.1149	4.87946	5.56246	5.31574	5.48829	5.49702	4.66352	5.2413	5.17332	5.1152	4.87946	5.40466	4.86578	6.03672	3.04332	4.26405	3.10502	-0.7093	2.5088	-0.884943	5.07238	5.42476	4.80386	4.27639	5.24572
hsa-miR-6880-5p	1.0621	7.4145	11.9852	4.72582e-26	6.28069e-25	48.2107	UP	6.32009	6.83266	7.32282	5.69614	5.88878	6.9407	6.73041	6.46485	6.23772	6.78104	7.15683	6.79086	7.26368	6.8879	7.31679	7.40263	7.83239	7.32884	7.22434	7.06565	6.47391	6.84282	7.15072	6.98822	6.56963	6.80126	6.87665	7.30297	6.80126	7.03251	6.91907	7.06055	7.51243	6.40475	5.01578	7.06565	6.98822	6.9407	6.5971	7.5187	6.39588	6.97687
hsa-miR-6881-3p	1.83361	1.64454	6.45214	6.41316e-10	2.44062e-09	11.4453	UP	4.53782	-1.56057	3.81695	-1.6019	-0.753	-1.33044	2.80826	3.82986	-0.361248	1.4609	3.4989	3.99265	2.31347	-1.37441	-0.79222	-1.15718	-1.12207	3.16847	-1.63592	-1.45183	0.352935	-0.90227	2.68237	3.07034	4.31664	0.11543	3.31762	-1.57398	2.21374	-1.64422	-1.4824	-1.45027	1.94436	2.68672	-0.7093	2.16496	-0.884943	-0.830044	0.542578	-1.50963	-1.60817	-1.14451
hsa-miR-6882-3p	3.06611	2.83108	12.3388	3.3796e-27	4.78933e-26	50.8345	UP	2.04744	-1.56057	4.81535	-1.6019	-0.753	3.52911	4.03246	3.0751	-0.361248	2.1739	4.2137	-1.53249	-1.59132	-1.37441	-0.79222	-1.15718	-1.12207	0.483209	-1.63592	3.32812	-1.63778	3.75616	3.23165	3.67564	0.828376	2.13949	0.0476652	3.02598	4.75268	4.21176	3.6424	-1.45027	4.07671	-1.41896	-0.7093	4.34211	4.76227	2.40219	3.63781	-1.50963	1.71448	-1.14451
hsa-miR-6883-3p	2.90171	2.45115	12.4627	1.33604e-27	1.92524e-26	51.7578	UP	4.35079	-1.56057	2.01998	-1.6019	-0.753	-1.33044	1.96437	-1.62016	-0.361248	3.95251	5.19184	4.77136	3.36322	-1.37441	-0.79222	3.28491	3.78204	-0.266556	-1.63592	-1.45183	2.9484	4.51463	-1.29147	4.29223	1.23051	4.20627	0.0143087	2.79693	2.32544	-1.64422	-1.4824	5.28692	-1.61629	2.05674	-0.7093	1.40394	-0.884943	3.28286	2.74305	-1.50963	-1.60817	-1.14451
hsa-miR-6883-5p	3.32124	1.01298	12.952	3.36932e-29	5.17504e-28	55.4199	UP	-1.64092	-1.56057	-1.63331	-1.6019	-0.753	-1.33044	-1.63632	-1.62016	-0.361248	2.24437	3.10067	-1.53249	-1.59132	-1.37441	-0.79222	-1.15718	-1.12207	-1.67499	0.256787	-1.45183	-1.63778	1.75743	-1.29147	-1.57603	-1.66136	-1.62534	-1.65392	-1.57398	-1.63472	-1.64422	1.61168	-1.45027	-1.61629	3.17544	-0.7093	-0.310426	-0.884943	-1.66156	-1.66329	-1.50963	-1.60817	-1.14451
hsa-miR-6884-3p	1.40928	4.24224	7.4577	1.77108e-12	8.65298e-12	17.2348	UP	4.73896	4.30933	4.90225	2.73631	4.31296	4.75268	4.02047	4.70739	-0.361248	4.44298	-1.08331	3.25058	3.46919	4.72407	5.20867	4.28183	4.75268	2.46166	4.08613	4.00182	4.64327	4.69289	4.82505	4.0689	5.01395	4.5	5.08603	4.29398	5.27092	4.85963	4.82126	4.74857	5.42476	4.28507	-0.7093	5.169	5.36518	4.77896	4.58323	4.52804	4.80192	-1.14451
hsa-miR-6884-5p	1.47017	0.827694	5.33955	2.22771e-07	6.37733e-07	5.73758	UP	1.81372	-1.56057	4.11671	-1.6019	3.74788	2.74781	-1.63632	1.08152	-0.361248	-1.49655	3.20369	4.22473	-1.59132	-1.37441	-0.79222	3.23369	-1.12207	0.511374	-0.542591	-1.45183	-1.63778	3.2377	3.6916	0.623074	-1.66136	-1.62534	-0.796198	3.71098	-1.63472	3.78836	-1.4824	4.17568	4.67094	-1.41896	-0.7093	3.67369	-0.884943	-1.66156	0.465687	-1.50963	0.108926	-1.14451
hsa-miR-6885-3p	2.05387	3.80229	9.83277	2.78953e-19	2.31558e-18	32.7246	UP	5.1152	4.29223	4.06339	4.80007	3.57552	2.77628	4.28898	4.60103	5.17754	-1.49655	4.74443	3.68195	3.90356	2.58325	-0.79222	-1.15718	-1.12207	3.78421	5.10893	3.55274	4.1149	4.67281	3.56174	3.85405	3.88913	4.14713	4.36828	4.15145	4.30933	1.66883	2.85565	2.46441	1.09743	-1.41896	4.03246	3.94113	4.41309	5.18151	4.53782	4.02437	4.71115	2.81257
hsa-miR-6886-3p	2.69231	3.73797	11.3256	6.17802e-24	7.04294e-23	43.3659	UP	4.18994	5.15252	0.187835	-1.6019	3.90711	2.34264	4.83233	4.80954	-0.361248	5.22388	-1.08331	-1.53249	4.33301	4.01313	-0.79222	-1.15718	-1.12207	3.52087	2.27166	3.85207	3.3373	4.32399	4.31472	4.5186	5.08603	4.39345	3.90356	1.98883	3.33254	5.81517	4.08063	3.21126	-1.61629	-1.41896	-0.7093	4.80954	-0.884943	4.29952	4.73369	5.69069	4.93961	-1.14451
hsa-miR-6886-5p	1.08406	3.00348	4.2861	2.67189e-05	6.03825e-05	1.12404	UP	2.67202	1.83204	3.46708	-1.6019	-0.753	-1.33044	3.73171	4.19177	4.75268	-1.49655	4.85201	1.97404	-1.59132	3.88376	-0.79222	-1.15718	8.97867	4.29223	5.12913	2.88213	4.36253	1.8061	3.66955	3.7621	1.78515	2.87754	0.0392891	4.62652	4.32213	-1.64422	2.37976	1.47925	3.37149	-1.41896	-0.7093	1.00713	4.39909	5.32442	4.92835	-1.50963	3.9701	-1.14451
hsa-miR-6887-3p	1.35866	4.20181	6.29492	1.53379e-09	5.6852e-09	10.5915	UP	2.49493	4.92252	5.17332	3.31154	4.80581	5.82705	4.42046	5.02757	5.07637	4.50768	4.93596	2.22817	4.4578	3.74788	4.80192	5.98924	2.64347	2.83425	4.45035	3.89621	3.2808	4.69666	4.42771	3.64725	3.83797	4.68938	4.26767	-1.57398	4.72972	4.42444	2.75213	4.64705	0.757757	2.4432	-0.7093	2.39171	-0.884943	4.22873	5.01212	5.10893	1.95392	4.44466
hsa-miR-6889-3p	1.65785	3.38508	6.64756	2.12804e-10	8.56895e-10	12.5268	UP	5.88878	-1.56057	3.18904	3.44125	4.45388	3.67564	4.50381	3.05507	-0.361248	-1.49655	5.17952	4.27811	0.886648	2.5088	-0.79222	-1.15718	-1.12207	-1.67499	3.57026	4.42046	3.38598	3.2734	4.27467	3.31979	4.42444	4.07277	2.84466	2.77628	5.00389	1.8873	4.19177	2.5333	3.57026	4.66726	3.50839	1.59224	3.48503	5.51554	3.48906	4.94153	-1.60817	4.23469
hsa-miR-6889-5p	1.62947	7.17431	18.4239	3.18009e-47	1.25491e-45	96.7718	UP	5.06672	5.54611	5.82705	4.91455	6.1407	7.23627	6.28646	6.65388	6.31169	6.70994	6.69116	6.3654	6.75993	6.42195	6.66236	6.25329	5.45357	6.83266	6.5013	6.56139	6.91907	5.98924	6.06192	6.34335	6.82289	6.78104	6.61624	6.27788	6.69116	6.79606	6.66236	6.43899	6.30348	5.393	5.65764	6.34335	5.84298	6.89867	6.3319	6.21475	6.49207	6.78104
hsa-miR-6890-3p	1.8615	3.53277	7.5562	9.67712e-13	4.82915e-12	17.8303	UP	5.15252	-1.56057	3.5945	2.02384	-0.753	4.19573	4.8286	4.86578	4.70383	4.81341	-1.08331	-1.53249	4.55091	5.2775	-0.79222	3.187	4.22294	-0.575396	3.9321	4.15517	4.46508	3.57026	3.39241	3.99265	3.87447	2.42731	4.1203	3.00988	4.96502	3.23165	4.52804	2.68015	5.10149	3.91718	-0.7093	5.01212	4.05975	-0.600696	4.86379	-1.50963	4.09973	2.53946
hsa-miR-6891-3p	1.45188	3.99503	7.44498	1.91415e-12	9.28849e-12	17.1583	UP	5.0076	4.5019	4.79822	2.47519	4.27639	3.987	1.61497	2.68455	4.07671	5.13694	4.91039	-1.53249	2.18335	8.71606	-0.79222	3.84871	3.94665	4.81535	3.29904	3.53887	4.44634	3.73966	4.00182	4.4578	4.64901	4.25383	4.5339	5.18987	4.96895	3.57026	4.41663	2.55954	4.63619	3.01555	4.73369	4.04706	3.84144	3.7016	4.42046	5.4367	4.98823	3.59647
hsa-miR-6891-5p	1.2115	6.80213	15.5435	9.28001e-38	2.24559e-36	75.05	UP	5.79527	3.10945	6.40475	6.04693	5.8461	5.47857	6.15511	5.35209	6.02674	5.81821	6.47862	4.17201	5.8461	6.36099	5.11918	5.93222	6.41284	5.37693	6.46485	6.36099	6.25329	6.06973	6.26125	6.43899	6.56139	6.41284	6.57438	6.14787	7.18156	6.68167	6.49207	6.11798	6.47391	6.80126	5.38365	6.41284	6.58784	7.12574	6.57914	6.87665	6.5189	7.16294
hsa-miR-6892-3p	1.20673	4.15068	5.70598	3.53056e-08	1.11252e-07	7.52874	UP	3.94846	5.12913	5.42924	3.94113	3.68744	4.83233	4.38408	5.20251	-0.361248	3.83347	-1.08331	-1.53249	4.8716	4.1848	3.68392	3.58824	-1.12207	4.66539	3.01364	4.77721	4.02863	4.42607	4.11309	4.06339	4.16242	4.66726	4.67281	4.7678	4.34896	4.76958	5.30684	5.55209	4.47817	4.92646	4.31296	4.46335	3.6089	5.01968	4.9902	4.87348	4.14929	2.88802
hsa-miR-6893-3p	2.3475	3.62441	10.2509	1.45975e-20	1.33247e-19	35.6514	UP	4.31664	0.61247	1.1749	-1.6019	3.81843	3.50427	3.37506	4.61198	4.51463	4.74857	-1.08331	2.20206	-1.59132	3.44334	-0.79222	-1.15718	-1.12207	3.69758	4.02437	2.55954	4.70383	4.09973	4.1848	4.75642	5.10526	4.28345	2.44578	3.89261	5.05887	3.68744	4.1397	-1.45027	-1.61629	-1.41896	-0.7093	3.19108	3.99993	5.71924	2.54188	-1.50963	4.42245	-1.14451
hsa-miR-6894-3p	2.83564	3.89902	12.0794	2.34244e-26	3.19594e-25	48.9087	UP	2.8798	4.83805	4.73896	-1.6019	-0.753	2.57046	3.65176	4.37763	-0.361248	2.97973	-1.08331	-1.53249	3.8263	3.04332	-0.79222	2.81717	-1.12207	5.14087	4.17945	3.02962	3.22325	3.96013	4.90608	4.09973	5.03343	4.4028	2.66507	3.9831	5.41586	4.74261	5.23644	-1.45027	4.20255	-1.41896	-0.7093	4.72407	-0.884943	4.46162	5.17332	3.81843	4.0689	2.99194
hsa-miR-6894-5p	1.43395	5.16589	8.31731	7.83519e-15	4.76239e-14	22.5832	UP	5.12713	4.57035	4.6247	3.82809	4.38611	2.23036	4.8173	5.59787	4.23262	4.73369	5.05512	5.59787	4.71469	3.95435	4.81341	4.89312	-1.12207	4.67828	5.97244	5.13694	4.71292	4.83999	5.07454	5.2662	5.04312	5.71355	5.12318	4.60103	4.08442	5.53036	4.57409	2.1105	4.08063	-1.41896	3.4933	5.04686	-0.884943	5.82705	5.28692	5.16716	5.52078	3.053
hsa-miR-7-5p	-1.38274	0.0816808	-5.04926	9.00179e-07	2.40517e-06	4.38465	DOWN	-1.64092	-1.56057	2.8798	1.43281	-0.753	-1.33044	-0.4035	2.5333	-0.361248	-1.49655	-1.08331	-1.53249	-1.59132	-1.37441	-0.79222	-1.15718	3.50839	1.38479	3.78836	-1.45183	4.01495	2.04253	-1.29147	-1.57603	-1.66136	0.500352	1.16171	-1.57398	-1.63472	-1.64422	-1.4824	-1.45027	-1.61629	-1.41896	-0.7093	-1.66395	-0.884943	4.64901	-1.66329	-1.50963	-1.60817	3.53887
hsa-miR-7106-3p	1.03051	4.38071	5.85097	1.66348e-08	5.49142e-08	8.26227	UP	4.07671	3.40579	5.77878	6.09062	3.48906	4.40594	4.7827	4.30745	5.22388	3.89441	-1.08331	5.50161	5.05887	-1.37441	5.73613	4.1848	-1.12207	3.04332	3.85207	4.72785	4.38088	4.25173	4.80581	4.00557	4.34896	3.77612	4.88135	4.51463	4.17757	4.76958	4.37763	4.67281	3.33033	4.63442	-0.7093	3.87816	-0.884943	-0.397133	3.45386	4.80386	2.68015	4.38814
hsa-miR-7106-5p	1.48068	5.40368	9.04282	6.40322e-17	4.66598e-16	27.3379	UP	3.25454	2.1222	4.96895	3.10067	3.67564	4.22873	5.11327	4.97456	4.27467	4.80954	5.83287	3.42183	-1.59132	2.78733	4.50768	4.37763	-1.12207	5.09332	4.88501	5.37939	5.67957	5.10893	5.65764	4.89853	5.10149	5.64091	5.16117	5.34274	5.8461	5.31574	5.43427	4.5	5.82705	4.48744	-0.7093	4.66352	5.2216	6.1407	5.45357	5.71355	5.93222	5.80852
hsa-miR-7109-3p	1.59986	4.69979	7.71549	3.60673e-13	1.87652e-12	18.8032	UP	5.30265	4.54526	4.95715	1.48842	4.50575	5.36057	5.52551	4.58149	-0.361248	5.05699	4.92835	5.427	5.26234	5.12513	5.97244	3.4933	-1.12207	1.56205	2.4112	3.93754	4.57768	4.59673	4.91039	4.98038	5.14478	4.80192	2.6084	4.61023	5.32442	4.96699	5.2985	4.29573	3.17952	2.92981	5.2985	4.20255	5.68502	5.28915	5.08	5.18987	5.2913	4.59074
hsa-miR-711	1.33552	7.91712	22.4043	8.07301e-60	9.00316e-58	125.678	UP	7.08956	7.46683	7.00951	6.44735	7.1997	7.70433	7.27766	7.92593	7.42691	7.08956	7.4793	6.68167	7.49237	6.81292	7.34033	6.32807	5.39071	7.5187	7.16294	7.40263	7.4534	7.39062	6.83266	7.53124	7.67375	7.62351	7.4793	7.23627	7.05546	7.3842	7.26368	7.36533	6.98822	7.05546	7.5187	7.25649	7.13781	7.82565	7.30297	7.04373	6.5529	6.9407
hsa-miR-7110-3p	2.46903	3.43024	9.91938	1.51988e-19	1.2995e-18	33.3269	UP	4.25173	3.00556	4.26017	2.45891	4.61624	3.84496	2.77184	-1.62016	-0.361248	-1.49655	-1.08331	3.12659	-1.59132	5.20251	4.29398	3.19339	-1.12207	5.01578	4.90225	4.77721	0.518087	2.82617	2.75407	5.13343	1.92998	3.43085	1.81941	3.96638	3.37506	3.63465	6.07707	2.23256	1.64663	3.99436	3.76406	2.12477	-0.884943	4.31856	4.02863	5.85785	5.06672	3.50427
hsa-miR-7110-5p	2.10786	6.91105	17.1673	4.05617e-43	1.35118e-41	87.3486	UP	5.8768	1.85002	5.89553	1.96697	5.39783	6.13301	5.36057	6.06973	5.95214	6.22958	6.63407	5.53518	6.01915	5.64091	6.78104	6.1407	-1.12207	6.37834	5.58763	5.93222	5.71355	5.70189	5.97948	6.22219	6.32009	6.00896	5.89553	6.43103	5.80161	5.70775	6.92964	5.57283	5.87373	3.96638	6.60678	6.06973	6.26966	7.05546	5.82705	5.83287	6.20723	5.36057
hsa-miR-7111-3p	1.19071	4.57764	6.98492	3.01777e-11	1.31867e-10	14.4448	UP	5.63523	6.51006	4.71645	0.892922	4.65245	4.85201	4.34557	4.24992	-0.361248	4.94937	5.17332	5.65764	4.53782	4.67468	5.2216	5.13891	4.7678	5.9208	3.75415	4.2137	4.35862	4.81341	3.23573	1.83473	5.22388	3.77244	5.07821	5.06079	5.19835	3.48906	5.01212	4.48196	4.79822	2.64585	4.82126	4.07671	4.44298	4.89502	5.27977	4.45388	5.0818	4.80581
hsa-miR-7112-5p	1.13194	4.73943	6.40716	8.24205e-10	3.11353e-09	11.1996	UP	3.98897	5.68502	5.11327	4.6066	-0.753	5.31109	4.88323	5.3378	4.1203	4.74443	4.89123	-1.53249	5.56246	2.59759	4.96895	3.2471	3.4032	5.66297	4.61624	5.04128	5.0314	4.31472	5.3378	4.68938	4.58497	5.07022	5.10709	5.1152	3.21939	4.5565	4.83611	5.19608	1.69239	-1.41896	4.75642	4.51463	-0.884943	5.14087	5.11713	2.66059	5.5409	4.05975
hsa-miR-7113-5p	2.01034	1.40658	6.9632	3.42838e-11	1.48795e-10	14.3194	UP	-1.64092	4.89312	4.57409	-1.6019	-0.753	2.10296	1.69717	1.29488	-0.361248	-1.49655	-1.08331	-1.53249	4.6858	4.16637	-0.79222	3.17544	-1.12207	2.6084	1.80332	-1.45183	3.13289	0.350061	-1.29147	-1.57603	-0.213861	2.03283	3.68744	4.47494	-1.63472	0.7507	5.27092	-1.45027	2.13374	-1.41896	-0.7093	3.65176	-0.884943	0.719098	0.805439	-1.50963	2.92444	-1.14451
hsa-miR-7114-5p	1.88465	7.54649	20.5155	6.2372e-54	4.3239e-52	112.166	UP	6.31169	5.49049	5.96901	5.97948	6.84282	6.85468	6.69116	6.34335	5.66864	6.5367	6.33574	5.3701	6.70052	6.1806	6.64345	6.31169	5.42924	6.52306	6.90836	6.64345	6.73041	6.96498	6.77033	6.73982	7.2493	6.86541	6.58784	6.85468	6.97092	6.66236	6.79606	6.57914	6.57438	6.70994	6.87665	6.62489	6.9407	7.50615	6.82777	7.18754	6.37834	7.67375
hsa-miR-7151-3p	2.52824	1.8758	9.74815	5.03849e-19	4.10277e-18	32.1384	UP	3.31762	-1.56057	5.55209	-1.6019	-0.753	-1.33044	-1.63632	-1.62016	-0.361248	-1.49655	-1.08331	4.14363	2.65845	-1.37441	-0.79222	-1.15718	5.19608	-0.599172	0.548735	2.73246	1.52046	-1.67642	3.64725	-1.57603	3.48503	3.1445	4.9377	-1.57398	2.2231	-0.261646	2.40806	3.34353	2.82176	4.34713	-0.7093	-1.66395	4.89853	4.16242	1.62158	3.54362	2.98749	-1.14451
hsa-miR-7152-3p	2.30988	1.39318	8.68719	6.92229e-16	4.55273e-15	24.9821	UP	3.12419	-1.56057	3.16633	3.13987	-0.753	-1.33044	0.640874	-1.62016	-0.361248	-1.49655	-1.08331	-1.53249	-1.59132	-1.37441	-0.79222	-1.15718	-1.12207	-1.67499	3.17302	-1.45183	-1.63778	-1.51065	-1.29147	2.2835	-1.66136	3.23967	4.41663	2.77184	-1.63472	-1.64422	4.70383	3.89976	3.92628	1.65816	-0.7093	3.20708	3.37327	-1.66156	0.224404	2.90043	-1.60817	-1.14451
hsa-miR-7152-5p	2.10608	2.05759	7.74922	2.92214e-13	1.53592e-12	19.0107	UP	3.07034	-1.56057	5.2985	1.7261	-0.753	2.17882	-1.63632	3.81695	-0.361248	1.33735	-1.08331	-1.53249	-1.59132	2.43384	-0.79222	-1.15718	-1.12207	-1.67499	3.72577	3.41286	-0.381244	-0.244	2.82176	-1.57603	2.06839	-0.314309	4.8173	-1.57398	4.44466	3.88913	3.9701	-1.45027	4.15145	2.73631	-0.7093	1.3306	-0.884943	0.267035	4.10662	-1.50963	1.67337	-1.14451
hsa-miR-7155-3p	1.74479	2.07685	6.06123	5.45867e-09	1.91539e-08	9.35005	UP	2.12477	5.69069	-1.63331	-1.6019	-0.753	-1.33044	2.82617	4.34023	-0.361248	-1.49655	-1.08331	-1.53249	-1.59132	-1.37441	-0.79222	-1.15718	-1.12207	3.11312	-1.63592	-1.45183	3.43891	3.8711	2.53946	-1.57603	4.51115	1.05752	3.01176	4.35862	2.9063	3.32441	3.61329	4.1848	-1.61629	-1.41896	-0.7093	4.19177	-0.884943	1.28214	2.1739	2.68237	4.32584	2.69633
[truncated: 67 more rows]
[truncated: 188 more columns]
